# Supplementary material for: Effect of duration of gonadotropin releasing hormone agonist on the outcome of in vitro fertilization-embryo transfer in a short-acting long regimen
Source: PubMed Central journal article supplement — Libyan J Med. 2019 Aug 13;14(1):1652058. doi: 10.1080/19932820.2019.1652058 (PMC8896834; doi:10.1080/19932820.2019.1652058), 2019-08-13
Supplement: ZLJM_A_1652058_SM5753.pdf [file ZLJM_A_1652058_SM5753.pdf]

| 分组 | REGCOD     | 姓名  | 年龄 | 姓名1 | 年龄1 | 不孕类型 | 不孕类型A | 不孕年限(年) |
|----|------------|-----|----|-----|-----|------|-------|---------|
| 3  | 2014020198 | 朱荣哲 | 37 | 李庆新 | 40  | 继发不孕 | 0     | 4       |
| 2  | 2014060082 | 王春洁 | 39 | 许日升 | 41  | 继发不孕 | 0     |         |
| 3  | 2014070017 | 张静  | 27 | 王国院 | 25  | 原发不孕 | 1     | 2       |
| 3  | 2014070056 | 孙萍  | 38 | 马辉  | 38  | 原发不孕 | 1     | 3       |
| 3  | 2014090013 | 王敏  | 38 | 王天翊 | 38  | 继发不孕 | 0     | 7       |
| 2  | 2014090028 | 金飞飞 | 31 | 赵显辉 | 31  | 原发不孕 | 1     | 2       |
| 3  | 2014100055 | 王丽波 | 36 | 车文杰 | 38  | 继发不孕 | 0     | 5       |
| 2  | 2014120124 | 王桂晶 | 34 | 李立山 | 33  | 继发不孕 | 0     | 2       |
| 2  | 2015010011 | 丁晓  | 29 | 马磊  | 31  | 继发不孕 | 0     | 6       |
| 3  | 2015010073 | 洪培柳 | 31 | 洪志兴 | 33  | 继发不孕 | 0     | 4       |
| 3  | 2015020047 | 吴霞  | 31 | 郜周斌 | 37  | 原发不孕 | 1     | 2       |
| 3  | 2015020087 | 朱金香 | 40 | 任彬彬 | 28  | 继发不孕 | 0     | 4       |
| 2  | 2015040079 | 马新娜 | 31 | 高建龙 | 31  | 原发不孕 | 1     | 3       |
| 3  | 2015040165 | 韩超  | 27 | 焦恒  | 30  | 继发不孕 | 0     | 4       |
| 2  | 2015050037 | 来丽华 | 29 | 周庆福 | 31  | 继发不孕 | 0     | 2       |
| 3  | 2015050053 | 徐明霞 | 28 | 柳晓辉 | 30  | 原发不孕 | 1     | 4       |
| 3  | 2015050080 | 王艳慧 | 27 | 郭成  | 31  | 原发不孕 | 1     | 3       |
| 3  | 2015050110 | 高改霞 | 34 | 马泽伟 | 42  | 原发不孕 | 1     | 6       |
| 3  | 2015050111 | 李霞  | 30 | 柳庆星 | 31  | 继发不孕 | 0     | 3       |
| 2  | 2015050112 | 师晶  | 35 | 王鲁  | 38  | 继发不孕 | 0     | 5       |
| 2  | 2015050126 | 李兆芹 | 27 | 武玉华 | 29  | 原发不孕 | 1     | 3       |
| 2  | 2015050134 | 仇清华 | 30 | 刘文磊 | 30  | 原发不孕 | 1     | 4       |
| 3  | 2015050137 | 李丹  | 26 | 刘文涛 | 31  | 继发不孕 | 0     | 1       |
| 3  | 2015050159 | 安然  | 24 | 乔建峰 | 27  | 原发不孕 | 1     | 3       |
| 2  | 2015050192 | 徐海风 | 29 | 刘凯  | 31  | 原发不孕 | 1     | 4       |
| 2  | 2015050198 | 于美丽 | 35 | 宫云亮 | 34  | 原发不孕 | 1     | 8       |
| 3  | 2015050212 | 杨新  | 33 | 肖传亮 | 34  | 原发不孕 | 1     | 3       |
| 3  | 2015060013 | 王静  | 24 | 赵凯  | 27  | 原发不孕 | 1     | 3       |
| 3  | 2015060014 | 张会婷 | 24 | 张彪  | 26  | 继发不孕 | 0     |         |
| 2  | 2015060085 | 冯振兰 | 33 | 殷长贵 | 31  | 继发不孕 | 0     | 1       |
| 3  | 2015060113 | 张薇  | 34 | 尹会光 | 36  | 原发不孕 | 1     | 2       |
| 2  | 2015060119 | 段凯英 | 39 | 周兆国 | 40  | 原发不孕 | 1     | 2       |
| 3  | 2015060135 | 马平  | 35 | 毕建平 | 36  | 继发不孕 | 0     | 1       |
| 3  | 2015060139 | 董雪兰 | 26 | 崔振博 | 27  | 原发不孕 | 1     | 4       |
| 3  | 2015060142 | 许伟伟 | 31 | 束宏图 | 36  | 原发不孕 | 1     | 7       |
| 2  | 2015060145 | 李朝霞 | 30 | 闫朝  | 31  | 原发不孕 | 1     | 2       |
| 3  | 2015060148 | 秦海洪 | 35 | 张峰  | 36  | 继发不孕 | 0     | 1       |
| 2  | 2015060154 | 雷娜娜 | 27 | 梁志  | 32  | 原发不孕 | 1     | 10      |
| 2  | 2015060167 | 宋友红 | 25 | 李义  | 25  | 原发不孕 | 1     | 3       |
| 2  | 2015060190 | 马真真 | 25 | 朱云凯 | 27  | 继发不孕 | 0     | 2       |
| 2  | 2015060201 | 王晴晴 | 28 | 贾文龙 | 27  | 原发不孕 | 1     | 5       |
| 2  | 2015060220 | 郑玉梅 | 29 | 刘仲旭 | 30  | 原发不孕 | 1     | 3       |
| 2  | 2015060221 | 林燕玲 | 27 | 徐闯  | 24  | 原发不孕 | 1     | 2       |
| 3  | 2015060226 | 刘翠  | 27 | 李晓岗 | 30  | 原发不孕 | 1     | 1       |
| 3  | 2015070010 | 刘钰  | 28 | 王文宁 | 28  | 继发不孕 | 0     | 2       |
| 3  | 2015070058 | 辛海霞 | 32 | 辛积浩 | 35  | 原发不孕 | 1     | 10      |
| 3  | 2015070063 | 刘秀霞 | 31 | 段宗贵 | 39  | 原发不孕 | 1     | 7       |
| 2  | 2015070094 | 吕广贤 | 33 | 兰俊杰 | 33  | 原发不孕 | 1     | 6       |
| 2  | 2015070096 | 陈玉芳 | 37 | 王世东 | 41  | 继发不孕 | 0     |         |

|   |            |     |    |     |    |      |   |    |
|---|------------|-----|----|-----|----|------|---|----|
| 2 | 2015070100 | 侯喜春 | 30 | 王文魁 | 30 | 原发不孕 | 1 | 1  |
| 2 | 2015070105 | 刘玉敬 | 31 | 李后乐 | 33 | 继发不孕 | 0 | 6  |
| 2 | 2015070107 | 许颖  | 34 | 马月涛 | 34 | 继发不孕 | 0 | 4  |
| 2 | 2015070138 | 刘晓凤 | 24 | 杨晨  | 28 | 继发不孕 | 0 | 1  |
| 1 | 2015070146 | 夏红梅 | 27 | 李庆福 | 26 | 原发不孕 | 1 | 3  |
| 2 | 2015070156 | 王立宏 | 31 | 刘宁  | 30 | 原发不孕 | 1 | 3  |
| 2 | 2015070176 | 冯亚宁 | 36 | 冯涛  | 36 | 继发不孕 | 0 | 4  |
| 3 | 2015070183 | 翟荣  | 32 | 李民  | 39 | 原发不孕 | 1 | 6  |
| 2 | 2015070184 | 乔乐燕 | 33 | 吕素涛 | 30 | 原发不孕 | 1 | 8  |
| 3 | 2015070197 | 刘振云 | 36 | 王庆刚 | 36 | 原发不孕 | 1 | 5  |
| 2 | 2015070198 | 李晶  | 30 | 张树林 | 51 | 继发不孕 | 0 | 5  |
| 2 | 2015070218 | 岳静  | 31 | 王勇  | 29 | 原发不孕 | 1 | 3  |
| 2 | 2015070221 | 张纹纹 | 31 | 王国庆 | 33 | 继发不孕 | 0 | 7  |
| 3 | 2015070222 | 张芳  | 33 | 周千洋 | 35 | 继发不孕 | 0 | 3  |
| 2 | 2015070223 | 王志静 | 37 | 唐超群 | 35 | 继发不孕 | 0 | 2  |
| 2 | 2015070225 | 张洪玲 | 25 | 张强  | 27 | 继发不孕 | 0 | 2  |
| 2 | 2015070229 | 亓燕  | 36 | 郭鹏  | 33 | 原发不孕 | 1 | 4  |
| 2 | 2015070231 | 钟玉娟 | 32 | 徐建刚 | 39 | 继发不孕 | 0 | 3  |
| 2 | 2015070232 | 孙姗姗 | 32 | 白春明 | 31 | 原发不孕 | 1 | 3  |
| 3 | 2015070244 | 冯英伟 | 34 | 刘学东 | 34 | 继发不孕 | 0 | 10 |
| 3 | 2015070246 | 杨立芹 | 24 | 王东  | 26 | 继发不孕 | 0 | 2  |
| 2 | 2015070261 | 刘爽  | 32 | 王志成 | 32 | 原发不孕 | 1 | 4  |
| 2 | 2015080002 | 黄真真 | 28 | 陈团辉 | 29 | 原发不孕 | 1 | 3  |
| 2 | 2015080023 | 呼群群 | 25 | 徐玉猛 | 26 | 继发不孕 | 0 | 1  |
| 2 | 2015080057 | 胡春花 | 26 | 武支友 | 26 | 原发不孕 | 1 | 3  |
| 3 | 2015080063 | 张信铃 | 31 | 尹文祥 | 27 | 原发不孕 | 1 | 2  |
| 2 | 2015080066 | 李士花 | 30 | 安建  | 34 | 原发不孕 | 1 | 3  |
| 2 | 2015080069 | 刘振兰 | 28 | 张剑  | 27 | 原发不孕 | 1 | 2  |
| 2 | 2015080112 | 王新荣 | 35 | 李爱民 | 33 | 原发不孕 | 1 | 11 |
| 2 | 2015080116 | 张艳  | 34 | 李振国 | 34 | 原发不孕 | 1 | 6  |
| 3 | 2015080129 | 王媛媛 | 26 | 张付鑫 | 29 | 原发不孕 | 1 | 7  |
| 2 | 2015080130 | 毛娟娟 | 30 | 杨文军 | 32 | 继发不孕 | 0 | 1  |
| 3 | 2015080131 | 董方  | 34 | 刘光源 | 36 | 继发不孕 | 0 | 6  |
| 2 | 2015080151 | 董学双 | 28 | 赵芝林 | 26 | 继发不孕 | 0 | 2  |
| 3 | 2015080158 | 张林芳 | 31 | 周继梁 | 33 | 继发不孕 | 0 | 5  |
| 2 | 2015080159 | 郑美夏 | 34 | 傅朋孟 | 36 | 原发不孕 | 1 | 7  |
| 2 | 2015080163 | 王倩  | 31 | 代宝刚 | 37 | 继发不孕 | 0 | 10 |
| 2 | 2015080167 | 王德凤 | 37 | 孔凡栋 | 39 | 原发不孕 | 1 | 6  |
| 2 | 2015080186 | 王习娟 | 40 | 郑松峰 | 43 | 继发不孕 | 0 | 4  |
| 2 | 2015080190 | 付秀美 | 31 | 党文涛 | 30 | 原发不孕 | 1 | 4  |
| 2 | 2015090001 | 马小霞 | 25 | 李玉银 | 25 | 继发不孕 | 0 | 1  |
| 2 | 2015090013 | 齐敏  | 26 | 刘君  | 27 | 原发不孕 | 1 | 4  |
| 1 | 2015090018 | 邵娟  | 29 | 赵龙飞 | 34 | 原发不孕 | 1 | 2  |
| 3 | 2015090047 | 单文萍 | 34 | 黄金峰 | 34 | 继发不孕 | 0 | 2  |
| 2 | 2015090059 | 姜华  | 35 | 侯峻巍 | 35 | 继发不孕 | 0 | 1  |
| 1 | 2015090064 | 党文雯 | 30 | 朱蓬  | 31 | 原发不孕 | 1 | 2  |
| 2 | 2015090081 | 陈合静 | 27 | 朱宪宾 | 27 | 原发不孕 | 1 | 5  |
| 1 | 2015090083 | 温若宇 | 25 | 温少鲁 | 29 | 原发不孕 | 1 | 3  |
| 2 | 2015090090 | 刘静  | 30 | 刘辉  | 30 | 原发不孕 | 1 | 5  |
| 2 | 2015090104 | 刘陆  | 33 | 姜建华 | 32 | 原发不孕 | 1 | 6  |

|   |            |     |    |     |    |      |   |    |
|---|------------|-----|----|-----|----|------|---|----|
| 2 | 2015090107 | 张丽  | 25 | 杜井杰 | 24 | 原发不孕 | 1 | 3  |
| 2 | 2015090110 | 贾光菊 | 29 | 史新峰 | 31 | 继发不孕 | 0 | 2  |
| 2 | 2015090120 | 钟敏  | 29 | 于少鹏 | 33 | 原发不孕 | 1 | 3  |
| 2 | 2015090129 | 齐文茜 | 35 | 朱海冬 | 34 | 原发不孕 | 1 | 3  |
| 2 | 2015090134 | 吴凤丽 | 36 | 于祥刚 | 46 | 原发不孕 | 1 | 6  |
| 2 | 2015090135 | 孙保霞 | 32 | 王永江 | 42 | 继发不孕 | 0 | 3  |
| 2 | 2015090154 | 魏绪荣 | 31 | 李常华 | 45 | 继发不孕 | 0 | 2  |
| 2 | 2015090157 | 迟晓妮 | 32 | 孙传超 | 32 | 原发不孕 | 1 | 3  |
| 2 | 2015090159 | 王丹  | 35 | 曲立波 | 36 | 原发不孕 | 1 | 3  |
| 2 | 2015090164 | 陈海霞 | 31 | 田荣河 | 33 | 继发不孕 | 0 | 2  |
| 2 | 2015090170 | 李成娟 | 34 | 徐炳栋 | 32 | 继发不孕 | 0 | 1  |
| 2 | 2015090179 | 常果  | 32 | 谢居科 | 31 | 继发不孕 | 0 |    |
| 2 | 2015090189 | 刘传新 | 28 | 刘康康 | 27 | 继发不孕 | 0 | 2  |
| 2 | 2015090193 | 颜娜  | 25 | 李波  | 25 | 原发不孕 | 1 | 1  |
| 2 | 2015090207 | 张立燕 | 39 | 杜华  | 41 | 继发不孕 | 0 | 3  |
| 2 | 2015090212 | 杨美玲 | 21 | 陈康龙 | 26 | 继发不孕 | 0 | 1  |
| 2 | 2015090224 | 刘欢  | 31 | 王经纬 | 30 | 原发不孕 | 1 | 5  |
| 2 | 2015090228 | 张燕  | 33 | 何立安 | 31 | 继发不孕 | 0 | 6  |
| 2 | 2015100003 | 王莉  | 31 | 马魁  | 33 | 原发不孕 | 1 |    |
| 3 | 2015100040 | 刘晓晓 | 24 | 盖旭伟 | 23 | 原发不孕 | 1 | 2  |
| 2 | 2015100043 | 张晓欣 | 35 | 武亨乾 | 28 | 原发不孕 | 1 | 1  |
| 3 | 2015100045 | 王茜  | 26 | 王启军 | 32 | 继发不孕 | 0 | 4  |
| 2 | 2015100056 | 杨冰倩 | 34 | 车增产 | 33 | 原发不孕 | 1 | 3  |
| 2 | 2015100068 | 仇伶燕 | 32 | 王飞  | 34 | 继发不孕 | 0 | 1  |
| 2 | 2015100075 | 程艳娟 | 35 | 张雨  | 36 | 继发不孕 | 0 | 5  |
| 2 | 2015100081 | 王翠  | 28 | 王家霖 | 29 | 原发不孕 | 1 | 3  |
| 2 | 2015100082 | 赵冉冉 | 27 | 王超  | 29 | 原发不孕 | 1 | 3  |
| 2 | 2015100111 | 周晓  | 24 | 安文荣 | 27 | 继发不孕 | 0 | 1  |
| 1 | 2015100112 | 王菊  | 34 | 刘海锋 | 32 | 继发不孕 | 0 | 2  |
| 3 | 2015100149 | 王磊  | 27 | 林志军 | 28 | 继发不孕 | 0 | 1  |
| 2 | 2015100166 | 李红  | 28 | 彭传佳 | 29 | 原发不孕 | 1 | 6  |
| 2 | 2015110014 | 王柏柏 | 25 | 李明  | 26 | 继发不孕 | 0 | 1  |
| 2 | 2015110023 | 张继红 | 34 | 张林  | 35 | 继发不孕 | 0 | 4  |
| 2 | 2015110024 | 颜红  | 25 | 王非  | 24 | 原发不孕 | 1 | 2  |
| 2 | 2015110025 | 盛静  | 31 | 孙赓  | 34 | 原发不孕 | 1 | 5  |
| 2 | 2015110026 | 王非非 | 28 | 郭健  | 27 | 原发不孕 | 1 | 5  |
| 1 | 2015110030 | 郑惠方 | 31 | 王田  | 30 | 原发不孕 | 1 | 3  |
| 2 | 2015110034 | 王小芳 | 37 | 刘瑜  | 37 | 继发不孕 | 0 | 5  |
| 2 | 2015110035 | 翟丹丹 | 27 | 韩怀乾 | 27 | 继发不孕 | 0 | 3  |
| 3 | 2015110040 | 王玉芬 | 39 | 姜培山 | 38 | 继发不孕 | 0 | 5  |
| 2 | 2015110072 | 高玉洁 | 30 | 于刚  | 31 | 原发不孕 | 1 | 4  |
| 3 | 2015110084 | 陈仪玮 | 31 | 庞志周 | 31 | 继发不孕 | 0 | 2  |
| 3 | 2015110087 | 王超  | 31 | 尚振岭 | 29 | 原发不孕 | 1 | 4  |
| 2 | 2015110093 | 李红  | 37 | 王少军 | 40 | 原发不孕 | 1 | 13 |
| 2 | 2015110096 | 王瑞瑞 | 27 | 任志勇 | 27 | 原发不孕 | 1 | 5  |
| 3 | 2015110100 | 周海燕 | 35 | 尹金杯 | 36 | 原发不孕 | 1 | 12 |
| 2 | 2015110125 | 卜丽娜 | 28 | 宋恩鲁 | 31 | 原发不孕 | 1 | 2  |
| 2 | 2015110129 | 李新颖 | 32 | 何兵  | 34 | 继发不孕 | 0 | 4  |
| 2 | 2015110134 | 武庆荣 | 36 | 陈慧生 | 35 | 继发不孕 | 0 | 2  |
| 2 | 2015110171 | 张荟洁 | 26 | 周伟  | 32 | 继发不孕 | 0 | 4  |

|   |            |     |    |     |    |      |   |    |
|---|------------|-----|----|-----|----|------|---|----|
| 2 | 2015110191 | 郑玉梅 | 29 | 刘仲旭 | 31 | 原发不孕 | 1 | 3  |
| 2 | 2015110197 | 赵桂香 | 33 | 丁立彬 | 31 | 继发不孕 | 0 | 2  |
| 2 | 2015110200 | 李圆圆 | 30 | 于刚  | 31 | 原发不孕 | 1 | 3  |
| 2 | 2015110205 | 杜盈盈 | 33 | 华仁贵 | 35 | 继发不孕 | 0 | 4  |
| 3 | 2015110206 | 董梅梅 | 24 | 柏宗涛 | 28 | 继发不孕 | 0 | 1  |
| 2 | 2015110229 | 朱孝红 | 28 | 肖亮  | 30 | 原发不孕 | 1 | 1  |
| 2 | 2015110231 | 迟玉凤 | 33 | 秦晓东 | 33 | 继发不孕 | 0 | 2  |
| 2 | 2015110241 | 张惠君 | 27 | 董文元 | 28 | 原发不孕 | 1 | 3  |
| 2 | 2015120005 | 周美荣 | 25 | 陈忠生 | 27 | 原发不孕 | 1 | 2  |
| 2 | 2015120029 | 毛粉梅 | 33 | 洒祥添 | 38 | 继发不孕 | 0 | 4  |
| 3 | 2015120039 | 秦玉芝 | 25 | 杜宗楼 | 27 | 原发不孕 | 1 | 4  |
| 2 | 2015120056 | 姜程玲 | 27 | 崔海东 | 27 | 原发不孕 | 1 | 2  |
| 3 | 2015120066 | 武庆红 | 40 | 刘晓东 | 46 | 继发不孕 | 0 | 3  |
| 1 | 2015120068 | 杨杨  | 25 | 孙海洋 | 27 | 原发不孕 | 1 | 2  |
| 2 | 2015120074 | 韩霜  | 31 | 陈阳  | 31 | 继发不孕 | 0 | 2  |
| 3 | 2015120085 | 张慧  | 37 | 石明  | 42 | 原发不孕 | 1 | 3  |
| 2 | 2015120089 | 田静静 | 32 | 赵辉  | 33 | 继发不孕 | 0 | 5  |
| 3 | 2015120091 | 臧华  | 31 | 范秋川 | 33 | 原发不孕 | 1 | 2  |
| 2 | 2015120095 | 赵丽  | 29 | 王佩冉 | 31 | 继发不孕 | 0 | 1  |
| 2 | 2015120099 | 王秀娟 | 36 | 阮希军 | 42 | 继发不孕 | 0 | 2  |
| 2 | 2015120100 | 李振振 | 29 | 刘德刚 | 31 | 原发不孕 | 1 | 6  |
| 2 | 2015120107 | 于晓琨 | 34 | 陈海波 | 32 | 继发不孕 | 0 | 4  |
| 3 | 2015120123 | 王静  | 28 | 李志祥 | 32 | 原发不孕 | 1 | 2  |
| 2 | 2015120145 | 宫凤香 | 26 | 张校扬 | 25 | 原发不孕 | 1 | 3  |
| 2 | 2015120179 | 马娜娜 | 31 | 谭花文 | 33 | 继发不孕 | 0 | 2  |
| 2 | 2015120180 | 明玉伟 | 30 | 赵学光 | 33 | 原发不孕 | 1 | 8  |
| 2 | 2015120214 | 李金花 | 33 | 邵佰虎 | 34 | 继发不孕 | 0 | 1  |
| 2 | 2015120223 | 辛慧莎 | 27 | 马良超 | 28 | 原发不孕 | 1 | 2  |
| 2 | 2015120224 | 张文娟 | 32 | 薄子健 | 35 | 原发不孕 | 1 | 7  |
| 2 | 2015120239 | 杨静  | 37 | 徐维国 | 38 | 继发不孕 | 0 | 7  |
| 2 | 2015120257 | 陈爱巧 | 40 | 袁春亮 | 44 | 继发不孕 | 0 | 1  |
| 3 | 2015120265 | 吴中妹 | 39 | 张加生 | 64 | 原发不孕 | 1 | 15 |
| 2 | 2016010025 | 滕小萌 | 33 | 陈守良 | 34 | 原发不孕 | 1 | 5  |
| 3 | 2016010139 | 李聪颖 | 30 | 张靖维 | 31 | 原发不孕 | 1 | 3  |
| 2 | 2016010141 | 亓红梅 | 40 | 马相东 | 42 | 继发不孕 | 0 | 3  |
| 2 | 2016010150 | 杜罕红 | 31 | 李建锐 | 29 | 原发不孕 | 1 | 3  |
| 3 | 2016010154 | 李慧  | 27 | 王海洋 | 29 | 原发不孕 | 1 | 2  |
| 3 | 2016020004 | 叶红  | 37 | 李昌博 | 38 | 继发不孕 | 0 | 2  |
| 3 | 2016020011 | 刘双  | 36 | 谷建华 | 39 | 原发不孕 | 1 | 1  |
| 3 | 2016020023 | 何飞云 | 38 | 翟书之 | 41 | 继发不孕 | 0 | 1  |
| 2 | 2016020044 | 姜楠  | 34 | 王天峰 | 38 | 原发不孕 | 1 | 4  |
| 3 | 2016020045 | 赵莉莉 | 32 | 李杨  | 25 | 继发不孕 | 0 | 1  |
| 2 | 2016020052 | 景爱玲 | 34 | 裘著林 | 36 | 继发不孕 | 0 | 1  |
| 2 | 2016020053 | 张文婧 | 29 | 马春福 | 32 | 原发不孕 | 1 | 3  |
| 2 | 2016020073 | 刘花  | 22 | 邵杨  | 26 | 继发不孕 | 0 | 1  |
| 2 | 2016020078 | 梁红  | 35 | 冯子杰 | 50 | 继发不孕 | 0 | 5  |
| 1 | 2016020095 | 常果  | 32 | 谢居科 | 31 | 继发不孕 | 0 | 1  |
| 2 | 2016020152 | 杨香美 | 32 | 赵子田 | 31 | 继发不孕 | 0 | 2  |
| 1 | 2016020153 | 王刘焕 | 33 | 孙安旺 | 33 | 继发不孕 | 0 | 1  |
| 2 | 2016030004 | 张利霞 | 25 | 张海强 | 27 | 继发不孕 | 0 | 4  |

|   |            |     |    |     |    |      |   |    |
|---|------------|-----|----|-----|----|------|---|----|
| 2 | 2016030019 | 王燕  | 37 | 张会冰 | 40 | 原发不孕 | 1 | 10 |
| 2 | 2016030023 | 张晓蕾 | 30 | 徐超  | 33 | 继发不孕 | 0 | 1  |
| 2 | 2016030028 | 孙珍  | 32 | 张明  | 33 | 原发不孕 | 1 | 3  |
| 2 | 2016030033 | 高风明 | 33 | 孙振峰 | 34 | 继发不孕 | 0 | 2  |
| 2 | 2016030041 | 侯振耀 | 27 | 刘虎  | 30 | 原发不孕 | 1 | 6  |
| 2 | 2016030060 | 王桂晶 | 36 | 李立山 | 35 | 继发不孕 | 0 | 2  |
| 2 | 2016030080 | 李瑜  | 34 | 史清晶 | 40 | 继发不孕 | 0 | 3  |
| 2 | 2016030096 | 黄晓彤 | 26 | 李涛  | 28 | 原发不孕 | 1 | 3  |
| 3 | 2016030123 | 张奉  | 31 | 闫伟  | 36 | 继发不孕 | 0 | 4  |
| 3 | 2016030146 | 吴艳丽 | 40 | 李建海 | 38 | 继发不孕 | 0 | 4  |
| 3 | 2016030149 | 郝霞  | 39 | 郝荣国 | 44 | 继发不孕 | 0 | 2  |
| 2 | 2016030162 | 刘建梅 | 40 | 李岩  | 40 | 继发不孕 | 0 | 5  |
| 3 | 2016030171 | 赵莉  | 37 | 丁洪海 | 37 | 继发不孕 | 0 | 3  |
| 2 | 2016030183 | 张淑华 | 30 | 耿斌  | 28 | 原发不孕 | 1 | 2  |
| 2 | 2016030185 | 刘艳青 | 37 | 万新权 | 37 | 继发不孕 | 0 | 5  |
| 1 | 2016030197 | 张雪  | 35 | 陈涛  | 36 | 继发不孕 | 0 | 5  |
| 3 | 2016030251 | 鲁桂芹 | 36 | 孙照国 | 38 | 原发不孕 | 1 | 13 |
| 2 | 2016030263 | 张吉明 | 37 | 张恒俊 | 41 | 继发不孕 | 0 | 5  |
| 2 | 2016030266 | 郑芳  | 34 | 李小波 | 36 | 继发不孕 | 0 | 11 |
| 2 | 2016030281 | 韩俊玲 | 28 | 王汝涛 | 29 | 继发不孕 | 0 | 3  |
| 2 | 2016030338 | 孙晶晶 | 36 | 邹立超 | 35 | 继发不孕 | 0 | 11 |
| 1 | 2016030344 | 纪艳青 | 27 | 商元星 | 26 | 原发不孕 | 1 | 4  |
| 2 | 2016040053 | 陈改霞 | 37 | 丁建华 | 38 | 继发不孕 | 0 | 1  |
| 2 | 2016040089 | 马培  | 26 | 张志明 | 30 | 原发不孕 | 1 | 3  |
| 2 | 2016040139 | 杜平平 | 27 | 林方坤 | 25 | 继发不孕 | 0 | 1  |
| 3 | 2016040140 | 李怀芳 | 39 | 颜伟  | 39 | 原发不孕 | 1 | 11 |
| 2 | 2016040149 | 冯振兰 | 34 | 殷长贵 | 32 | 继发不孕 | 0 | 2  |
| 1 | 2016040156 | 杨文静 | 29 | 李洪禄 | 34 | 继发不孕 | 0 | 3  |
| 2 | 2016040167 | 李孟  | 30 | 薛居存 | 27 | 原发不孕 | 1 | 1  |
| 2 | 2016040168 | 宋继岩 | 30 | 刘新栋 | 36 | 继发不孕 | 0 | 2  |
| 2 | 2016040201 | 杨娜娜 | 29 | 张华杰 | 28 | 原发不孕 | 1 | 6  |
| 2 | 2016040204 | 秦玉芝 | 27 | 杜宗楼 | 27 | 原发不孕 | 1 | 4  |
| 2 | 2016040210 | 李宁宁 | 30 | 李华  | 37 | 继发不孕 | 0 | 4  |
| 1 | 2016040265 | 张雪霞 | 22 | 黄山蒙 | 23 | 原发不孕 | 1 | 4  |
| 2 | 2016040308 | 马召雁 | 39 | 袁家平 | 45 | 继发不孕 | 0 | 13 |
| 2 | 2016040310 | 孙萍萍 | 32 | 季同  | 31 | 原发不孕 | 1 | 2  |
| 3 | 2016050014 | 张淑娥 | 30 | 杜扩祥 | 29 | 原发不孕 | 1 | 5  |
| 2 | 2016050020 | 刘振兰 | 29 | 张剑  | 28 | 原发不孕 | 1 | 2  |
| 3 | 2016050022 | 张芳  | 28 | 李焕刚 | 29 | 继发不孕 | 0 | 1  |
| 1 | 2016050025 | 尹利娟 | 27 | 杨伟明 | 31 | 原发不孕 | 1 | 4  |
| 3 | 2016050049 | 孙芬芬 | 28 | 高京伟 | 31 | 继发不孕 | 0 | 1  |
| 3 | 2016050085 | 李祥敏 | 36 | 何庆伟 | 32 | 继发不孕 | 0 | 1  |
| 2 | 2016050088 | 姚辉  | 36 | 王善斌 | 40 | 继发不孕 | 0 | 7  |
| 2 | 2016050101 | 王永静 | 28 | 张建新 | 27 | 继发不孕 | 0 | 1  |
| 2 | 2016050117 | 李倩倩 | 27 | 殷虎  | 26 | 原发不孕 | 1 | 3  |
| 2 | 2016050126 | 阚吉娟 | 35 | 张月波 | 35 | 继发不孕 | 0 | 3  |
| 2 | 2016050169 | 周姗姗 | 34 | 余洋  | 32 | 继发不孕 | 0 | 2  |
| 2 | 2016050182 | 毛焕英 | 29 | 赵海  | 30 | 原发不孕 | 1 | 5  |
| 2 | 2016050187 | 何洁  | 28 | 刘颖  | 29 | 原发不孕 | 1 | 3  |
| 1 | 2016050188 | 李晓娟 | 28 | 王忠强 | 28 | 继发不孕 | 0 | 3  |

|   |            |     |    |     |    |      |   |    |
|---|------------|-----|----|-----|----|------|---|----|
| 2 | 2016050190 | 王娟  | 39 | 黄东  | 40 | 继发不孕 | 0 | 1  |
| 2 | 2016050207 | 陈扬  | 31 | 鞠延洁 | 32 | 继发不孕 | 0 | 2  |
| 2 | 2016050208 | 高晶  | 34 | 田浩  | 35 | 继发不孕 | 0 | 4  |
| 2 | 2016050220 | 丁春杰 | 36 | 丁建辉 | 36 | 继发不孕 | 0 | 2  |
| 2 | 2016050227 | 彭敏  | 34 | 李正军 | 38 | 继发不孕 | 0 | 3  |
| 2 | 2016050243 | 许艳芳 | 38 | 李龙峰 | 55 | 继发不孕 | 0 | 2  |
| 1 | 2016050251 | 高羽  | 34 | 李美苗 | 35 | 继发不孕 | 0 | 1  |
| 1 | 2016060023 | 鞠晓艳 | 31 | 张磊  | 33 | 继发不孕 | 0 | 1  |
| 2 | 2016060054 | 刘立梅 | 35 | 黄福生 | 34 | 原发不孕 | 1 | 5  |
| 1 | 2016060064 | 韩帽  | 30 | 耿明明 | 33 | 原发不孕 | 1 | 5  |
| 1 | 2016060075 | 刘小文 | 33 | 徐峰  | 34 | 继发不孕 | 0 | 7  |
| 1 | 2016060086 | 华王倩 | 26 | 郑伟  | 26 | 原发不孕 | 1 | 2  |
| 1 | 2016060088 | 朱翠翠 | 28 | 张国良 | 29 | 原发不孕 | 1 | 1  |
| 2 | 2016060102 | 丁莎  | 30 | 赵云川 | 28 | 原发不孕 | 1 | 3  |
| 1 | 2016060117 | 庞恒月 | 28 | 王进超 | 29 | 继发不孕 | 0 | 2  |
| 2 | 2016060197 | 路艳杰 | 28 | 张如兵 | 25 | 原发不孕 | 1 | 4  |
| 2 | 2016060201 | 郑慧辉 | 30 | 董大荣 | 44 | 原发不孕 | 1 | 3  |
| 2 | 2016060213 | 于艳  | 36 | 王君海 | 40 | 继发不孕 | 0 | 2  |
| 1 | 2016060226 | 孔德珍 | 29 | 常佃宝 | 29 | 继发不孕 | 0 | 2  |
| 2 | 2016060244 | 代静  | 28 | 桑锐锐 | 26 | 继发不孕 | 0 | 1  |
| 2 | 2016060245 | 辛巧莲 | 31 | 赵葆光 | 34 | 继发不孕 | 0 | 1  |
| 2 | 2016060250 | 侯静  | 31 | 李振  | 30 | 继发不孕 | 0 | 3  |
| 3 | 2016060261 | 孙亭亭 | 27 | 王跃  | 28 | 原发不孕 | 1 | 2  |
| 1 | 2016060262 | 周燕  | 27 | 孙健  | 28 | 原发不孕 | 1 | 4  |
| 3 | 2016060275 | 潘芹  | 39 | 亓军  | 43 | 原发不孕 | 1 | 1  |
| 2 | 2016070005 | 崔艳濮 | 31 | 刘广飞 | 31 | 原发不孕 | 1 | 8  |
| 2 | 2016070018 | 孙林晓 | 29 | 宋述杰 | 29 | 原发不孕 | 1 | 2  |
| 2 | 2016070021 | 蒋丽丽 | 28 | 段京刚 | 37 | 继发不孕 | 0 | 5  |
| 2 | 2016070023 | 陈海迪 | 27 | 齐崇永 | 30 | 继发不孕 | 0 | 2  |
| 3 | 2016070024 | 杨学娟 | 29 | 刘传涛 | 29 | 原发不孕 | 1 | 6  |
| 2 | 2016070086 | 孙立霞 | 31 | 王志勇 | 34 | 继发不孕 | 0 | 3  |
| 2 | 2016070089 | 张丽华 | 28 | 李建敏 | 29 | 继发不孕 | 0 | 4  |
| 2 | 2016070092 | 李玮  | 26 | 杨帆  | 27 | 原发不孕 | 1 | 2  |
| 3 | 2016070093 | 史艳艳 | 29 | 金明  | 33 | 原发不孕 | 1 | 3  |
| 2 | 2016070103 | 韩苹  | 29 | 亓磊  | 26 | 原发不孕 | 1 | 5  |
| 2 | 2016070109 | 武瑞雪 | 38 | 王永明 | 39 | 原发不孕 | 1 | 12 |
| 2 | 2016070110 | 庄会妹 | 28 | 韩守锋 | 30 | 原发不孕 | 1 |    |
| 2 | 2016070133 | 卞静静 | 30 | 李廷磊 | 31 | 继发不孕 | 0 | 6  |
| 2 | 2016070149 | 韩萍萍 | 22 | 韩作福 | 25 | 原发不孕 | 1 | 1  |
| 3 | 2016070158 | 闫贵妮 | 30 | 李金融 | 33 | 继发不孕 | 0 | 3  |
| 2 | 2016070159 | 邓莉  | 34 | 魏志永 | 36 | 原发不孕 | 1 | 5  |
| 2 | 2016070165 | 王玉  | 27 | 张旭升 | 29 | 原发不孕 | 1 | 1  |
| 3 | 2016070179 | 范秀英 | 36 | 刘为  | 37 | 继发不孕 | 0 | 1  |
| 2 | 2016070188 | 陈秋燕 | 29 | 崔翔  | 28 | 原发不孕 | 1 | 3  |
| 2 | 2016070216 | 翟爽  | 32 | 朱玉磊 | 34 | 原发不孕 | 1 | 3  |
| 3 | 2016080015 | 王艳秋 | 32 | 王玉刚 | 37 | 继发不孕 | 0 | 2  |
| 3 | 2016080034 | 隋丽  | 32 | 赵贤真 | 37 | 继发不孕 | 0 | 3  |
| 2 | 2016080035 | 董照晶 | 29 | 郭正栋 | 27 | 继发不孕 | 0 | 1  |
| 2 | 2016080064 | 王丽丽 | 36 | 李胜国 | 37 | 继发不孕 | 0 | 7  |
| 1 | 2016080083 | 王小梅 | 37 | 高树华 | 51 | 继发不孕 | 0 | 9  |

|   |            |     |    |     |    |      |   |    |
|---|------------|-----|----|-----|----|------|---|----|
| 3 | 2016080092 | 程巧军 | 30 | 李正伟 | 29 | 原发不孕 | 1 | 5  |
| 2 | 2016080124 | 朱婷  | 29 | 于国庆 | 27 | 继发不孕 | 0 |    |
| 2 | 2016080132 | 徐文凤 | 31 | 李伟  | 33 | 继发不孕 | 0 | 3  |
| 3 | 2016080135 | 王金英 | 34 | 王兴  | 44 | 继发不孕 | 0 | 3  |
| 2 | 2016080182 | 张萍莉 | 38 | 王彦坤 | 37 | 继发不孕 | 0 | 3  |
| 2 | 2016080184 | 张扬  | 29 | 刘杨  | 35 | 继发不孕 | 0 | 3  |
| 3 | 2016080209 | 刘丙丽 | 26 | 付玉亮 | 27 | 原发不孕 | 1 | 6  |
| 2 | 2016080213 | 张京凤 | 34 | 王善刚 | 35 | 原发不孕 | 1 | 10 |
| 3 | 2016090010 | 张美荣 | 36 | 张仔燕 | 37 | 继发不孕 | 0 | 6  |
| 3 | 2016090037 | 屈衍敏 | 25 | 司呈飞 | 29 | 原发不孕 | 1 | 2  |
| 2 | 2016090042 | 马彩虹 | 26 | 李正  | 26 | 原发不孕 | 1 | 4  |
| 3 | 2016090095 | 邹莉  | 33 | 张国星 | 32 | 原发不孕 | 1 | 5  |
| 2 | 2016090193 | 赖欣  | 37 | 曹一鸣 | 42 | 继发不孕 | 0 | 4  |
| 2 | 2016090214 | 潘青  | 34 | 刘立成 | 33 | 继发不孕 | 0 | 1  |
| 1 | 2016090217 | 英倩  | 33 | 林学才 | 36 | 原发不孕 | 1 | 2  |
| 2 | 2016090218 | 邵德学 | 28 | 彭绵腾 | 29 | 原发不孕 | 1 | 2  |
| 2 | 2016090237 | 王娟  | 39 | 黄东  | 40 | 继发不孕 | 0 | 1  |
| 2 | 2016090251 | 侯妨  | 30 | 赵奉永 | 34 | 原发不孕 | 1 | 3  |
| 2 | 2016100011 | 许莹莹 | 29 | 张旺  | 30 | 原发不孕 | 1 | 5  |
| 2 | 2016100025 | 潘俊秀 | 27 | 马凯  | 27 | 原发不孕 | 1 | 2  |
| 2 | 2016100026 | 于红云 | 39 | 明军  | 35 | 继发不孕 | 0 | 1  |
| 2 | 2016100028 | 邓滕滕 | 29 | 鲁东方 | 32 | 原发不孕 | 1 | 1  |
| 1 | 2016100029 | 李龙婷 | 26 | 董峻豪 | 27 | 原发不孕 | 1 | 1  |
| 2 | 2016100030 | 丁娟  | 31 | 孙凯  | 34 | 原发不孕 | 1 | 4  |
| 2 | 2016100035 | 姜丽  | 35 | 吕昌磊 | 34 | 继发不孕 | 0 |    |
| 1 | 2016100038 | 张聪  | 28 | 郭洪瑞 | 29 | 原发不孕 | 1 | 3  |
| 3 | 2016100059 | 孙姣姣 | 28 | 蒋朋朋 | 28 | 原发不孕 | 1 | 6  |
| 2 | 2016100071 | 王红柳 | 26 | 任健  | 27 | 原发不孕 | 1 | 2  |
| 3 | 2016100077 | 齐红维 | 21 | 杜学云 | 22 | 原发不孕 | 1 | 2  |
| 3 | 2016100101 | 栾文娟 | 29 | 付晓明 | 28 | 原发不孕 | 1 | 4  |
| 2 | 2016100103 | 鞠超  | 26 | 刘明光 | 28 | 原发不孕 | 1 | 2  |
| 2 | 2016100104 | 范翠苹 | 33 | 范玉兴 | 34 | 继发不孕 | 0 | 2  |
| 1 | 2016100109 | 路迎春 | 30 | 李安全 | 30 | 继发不孕 | 0 | 1  |
| 2 | 2016100112 | 唐晓音 | 30 | 何春光 | 32 | 原发不孕 | 1 | 1  |
| 2 | 2016100114 | 代营营 | 30 | 孙家亮 | 32 | 原发不孕 | 1 | 3  |
| 3 | 2016100115 | 郑灵雪 | 23 | 毕云鹏 | 24 | 原发不孕 | 1 | 3  |
| 1 | 2016100116 | 李燕红 | 29 | 张涛  | 29 | 继发不孕 | 0 | 3  |
| 2 | 2016100124 | 刘欣欣 | 27 | 朱跃华 | 25 | 原发不孕 | 1 | 3  |
| 2 | 2016100125 | 杨倩  | 25 | 李云龙 | 26 | 原发不孕 | 1 | 2  |
| 3 | 2016100160 | 官莹  | 28 | 王蛟  | 35 | 继发不孕 | 0 | 1  |
| 1 | 2016100170 | 刘新  | 33 | 刘善活 | 36 | 继发不孕 | 0 | 2  |
| 2 | 2016100180 | 朱艳萍 | 29 | 王奎  | 26 | 继发不孕 | 0 | 2  |
| 2 | 2016100192 | 耿甜甜 | 27 | 董学鹏 | 25 | 原发不孕 | 1 | 1  |
| 3 | 2016100196 | 潘燕红 | 36 | 焦海峰 | 38 | 原发不孕 | 1 | 13 |
| 2 | 2016100198 | 李文静 | 21 | 李风阅 | 24 | 原发不孕 | 1 | 1  |
| 3 | 2016100204 | 宋海英 | 33 | 王宝  | 33 | 继发不孕 | 0 | 2  |
| 2 | 2016100213 | 李慧  | 31 | 王硕  | 32 | 原发不孕 | 1 | 5  |
| 2 | 2016100216 | 龚晓琳 | 27 | 张吉坤 | 29 | 继发不孕 | 0 | 3  |
| 2 | 2016100219 | 生建美 | 28 | 鞠波宇 | 26 | 原发不孕 | 1 | 3  |
| 2 | 2016100222 | 宋秋月 | 27 | 张满堂 | 26 | 继发不孕 | 0 | 2  |

|   |            |     |    |     |    |      |   |   |
|---|------------|-----|----|-----|----|------|---|---|
| 1 | 2016110015 | 邢宏雷 | 28 | 王强  | 29 | 继发不孕 | 0 | 2 |
| 2 | 2016110044 | 于美丽 | 37 | 宫云亮 | 35 | 原发不孕 | 1 | 8 |
| 3 | 2016110045 | 高雪  | 26 | 匡凯  | 28 | 原发不孕 | 1 | 1 |
| 2 | 2016110054 | 刘文凤 | 35 | 张义伟 | 34 | 继发不孕 | 0 | 1 |
| 2 | 2016110066 | 朵丽新 | 24 | 郭少雷 | 22 | 继发不孕 | 0 | 3 |
| 2 | 2016110070 | 于常芳 | 26 | 张斌  | 27 | 继发不孕 | 0 | 2 |
| 2 | 2016110095 | 刘薇  | 29 | 魏述刚 | 30 | 原发不孕 | 1 | 3 |
| 3 | 2016110126 | 陈翠英 | 25 | 田崇旺 | 28 | 原发不孕 | 1 | 4 |
| 2 | 2016110134 | 赵晴晴 | 28 | 卞聪  | 29 | 继发不孕 | 0 | 3 |
| 2 | 2016110141 | 范妮娜 | 33 | 赵小龙 | 31 | 原发不孕 | 1 | 4 |
| 2 | 2016110145 | 邢俊倩 | 28 | 王吉奎 | 27 | 继发不孕 | 0 | 2 |
| 2 | 2016110148 | 姚宗君 | 30 | 聂守义 | 31 | 继发不孕 | 0 |   |
| 2 | 2016110160 | 张文文 | 30 | 韩朋  | 32 | 继发不孕 | 0 | 3 |
| 1 | 2016110280 | 韩帼  | 30 | 耿明明 | 33 | 原发不孕 | 1 | 5 |
| 2 | 2016110281 | 于红  | 40 | 陶磊  | 43 | 继发不孕 | 0 | 6 |
| 2 | 2016110283 | 邹燕  | 30 | 刘林  | 35 | 继发不孕 | 0 | 2 |
| 2 | 2016120008 | 刘春  | 26 | 苑延滨 | 26 | 原发不孕 | 1 | 3 |
| 3 | 2016120019 | 韩娇  | 27 | 陈兴革 | 31 | 原发不孕 | 1 | 3 |
| 2 | 2016120024 | 任文文 | 26 | 孙光辉 | 27 | 原发不孕 | 1 | 4 |
| 2 | 2016120025 | 霍其珍 | 26 | 张彦顺 | 35 | 继发不孕 | 0 | 1 |
| 3 | 2016120037 | 马琳  | 31 | 商洪昌 | 33 | 继发不孕 | 0 | 2 |
| 3 | 2016120041 | 郑宁宁 | 28 | 王光宗 | 29 | 原发不孕 | 1 | 3 |
| 2 | 2016120054 | 李云  | 38 | 周翠升 | 45 | 继发不孕 | 0 | 1 |
| 2 | 2016120056 | 张春花 | 35 | 周艳文 | 32 | 继发不孕 | 0 | 4 |
| 2 | 2016120062 | 朱婷  | 29 | 于国庆 | 28 | 继发不孕 | 0 | 3 |
| 3 | 2016120068 | 靳倩  | 27 | 杨斌  | 30 | 原发不孕 | 1 | 1 |
| 3 | 2016120072 | 王辉  | 38 | 郝建飞 | 40 | 原发不孕 | 1 | 6 |
| 3 | 2016120100 | 尹莎莎 | 32 | 苏彦瑾 | 28 | 继发不孕 | 0 | 4 |
| 2 | 2016120112 | 胡振华 | 30 | 张付立 | 32 | 原发不孕 | 1 | 2 |
| 2 | 2016120121 | 陈红娟 | 28 | 黄凯  | 32 | 原发不孕 | 1 | 2 |
| 3 | 2016120135 | 张立伟 | 31 | 李良良 | 30 | 继发不孕 | 0 | 4 |
| 1 | 2016120144 | 于艳  | 36 | 王君海 | 41 | 继发不孕 | 0 | 2 |
| 2 | 2016120164 | 段婷婷 | 27 | 尚凡东 | 29 | 继发不孕 | 0 | 6 |
| 3 | 2016120176 | 田芹  | 31 | 亓越  | 37 | 继发不孕 | 0 | 3 |
| 2 | 2016120180 | 李国英 | 38 | 单重江 | 39 | 继发不孕 | 0 | 3 |
| 2 | 2016120215 | 刘芳琼 | 40 | 吴其奎 | 44 | 继发不孕 | 0 | 3 |
| 1 | 2017010008 | 郭桂芝 | 35 | 武锡刚 | 46 | 继发不孕 | 0 | 3 |
| 2 | 2017010009 | 宋丽君 | 37 | 刘福卿 | 56 | 继发不孕 | 0 | 2 |
| 3 | 2017010020 | 闫磊  | 29 | 翟荣强 | 30 | 继发不孕 | 0 | 1 |
| 3 | 2017010027 | 王凤儒 | 37 | 陈强  | 41 | 继发不孕 | 0 | 1 |
| 3 | 2017010042 | 田甜  | 29 | 庞振  | 30 | 继发不孕 | 0 | 2 |
| 3 | 2017010049 | 尹笑  | 27 | 徐加民 | 31 | 继发不孕 | 0 | 1 |
| 3 | 2017010058 | 王一帆 | 32 | 杨阳  | 34 | 继发不孕 | 0 | 2 |
| 3 | 2017010059 | 李真真 | 27 | 王浩宇 | 26 | 继发不孕 | 0 | 1 |
| 2 | 2017010064 | 孟宪立 | 31 | 袁哲  | 34 | 原发不孕 | 1 | 4 |
| 1 | 2017010065 | 周静  | 37 | 翟沂  | 35 | 继发不孕 | 0 | 1 |
| 2 | 2017010071 | 张光梓 | 32 | 张栋栋 | 34 | 继发不孕 | 0 | 3 |
| 1 | 2017010079 | 苑乐霞 | 29 | 孟庆石 | 34 | 继发不孕 | 0 | 3 |
| 2 | 2017010095 | 刘翠翠 | 27 | 赵旭  | 25 | 原发不孕 | 1 | 1 |
| 3 | 2017010096 | 郑焕英 | 24 | 王建章 | 25 | 原发不孕 | 1 | 3 |



|   |            |     |    |     |    |      |   |    |
|---|------------|-----|----|-----|----|------|---|----|
| 1 | 2017010109 | 陶园  | 33 | 刘金元 | 32 | 继发不孕 | 0 | 2  |
| 2 | 2017010110 | 纪燕  | 34 | 王彤  | 39 | 继发不孕 | 0 | 4  |
| 3 | 2017020005 | 张长美 | 28 | 许永传 | 31 | 继发不孕 | 0 | 3  |
| 3 | 2017020006 | 焦祿  | 35 | 于盟  | 36 | 继发不孕 | 0 | 3  |
| 1 | 2017020018 | 刘媛  | 35 | 刘志波 | 35 | 继发不孕 | 0 | 2  |
| 1 | 2017020020 | 梁芳  | 31 | 解传利 | 29 | 原发不孕 | 1 | 1  |
| 3 | 2017020022 | 张静丽 | 22 | 牛凤照 | 22 | 继发不孕 | 0 | 2  |
| 3 | 2017020036 | 罗锦旻 | 40 | 王凯  | 40 | 继发不孕 | 0 | 2  |
| 2 | 2017020050 | 朱翠翠 | 29 | 张国良 | 29 | 原发不孕 | 1 | 1  |
| 3 | 2017020054 | 高盼盼 | 26 | 孟令东 | 28 | 原发不孕 | 1 | 3  |
| 1 | 2017020062 | 刘玉玲 | 38 | 杨鲲  | 39 | 继发不孕 | 0 | 2  |
| 1 | 2017020064 | 蒋星  | 31 | 郭银杰 | 37 | 原发不孕 | 1 | 2  |
| 2 | 2017020067 | 王萌  | 28 | 郭钊  | 24 | 继发不孕 | 0 | 3  |
| 2 | 2017020068 | 司春超 | 28 | 孟浩奇 | 29 | 原发不孕 | 1 | 1  |
| 1 | 2017020075 | 杨秀霞 | 35 | 刘光义 | 33 | 原发不孕 | 1 | 2  |
| 2 | 2017020090 | 段广洋 | 25 | 董晓林 | 25 | 原发不孕 | 1 | 2  |
| 1 | 2017020091 | 亓惠  | 37 | 谭永宝 | 40 | 继发不孕 | 0 | 3  |
| 3 | 2017020100 | 郑翠翠 | 27 | 赵则明 | 28 | 继发不孕 | 0 | 3  |
| 3 | 2017020116 | 王欣玲 | 40 | 石长春 | 42 | 继发不孕 | 0 | 1  |
| 3 | 2017020120 | 王艳  | 34 | 魏征  | 37 | 原发不孕 | 1 | 3  |
| 3 | 2017020127 | 高广雪 | 26 | 孙海涛 | 24 | 原发不孕 | 1 | 3  |
| 3 | 2017020136 | 王霞  | 35 | 徐瑞红 | 38 | 继发不孕 | 0 | 3  |
| 1 | 2017020138 | 王娟  | 28 | 张瑞峰 | 30 | 继发不孕 | 0 | 1  |
| 2 | 2017020146 | 李雷  | 24 | 许锁锁 | 27 | 继发不孕 | 0 | 3  |
| 3 | 2017020148 | 张春青 | 32 | 朱秀峰 | 35 | 继发不孕 | 0 | 5  |
| 2 | 2017020153 | 程巧军 | 31 | 李正伟 | 30 | 原发不孕 | 1 | 5  |
| 1 | 2017020160 | 张红梅 | 35 | 常钦光 | 36 | 继发不孕 | 0 | 3  |
| 2 | 2017020166 | 张俊梅 | 39 | 杜法和 | 43 | 继发不孕 | 0 | 6  |
| 1 | 2017020169 | 高新  | 29 | 刘涛  | 29 | 原发不孕 | 1 | 6  |
| 1 | 2017020177 | 郑金凤 | 38 | 张金荣 | 40 | 继发不孕 | 0 | 1  |
| 3 | 2017020205 | 李娜  | 28 | 石崇起 | 29 | 原发不孕 | 1 | 3  |
| 1 | 2017020208 | 李申美 | 37 | 叶伟  | 35 | 继发不孕 | 0 | 1  |
| 1 | 2017020210 | 高旋  | 29 | 陈琦  | 27 | 原发不孕 | 1 | 1  |
| 1 | 2017020211 | 孟玲  | 38 | 李祎  | 46 | 继发不孕 | 0 | 2  |
| 1 | 2017030009 | 郝玉婷 | 37 | 杨亮  | 41 | 继发不孕 | 0 | 4  |
| 1 | 2017030016 | 钟清清 | 28 | 谭富健 | 27 | 原发不孕 | 1 | 9  |
| 1 | 2017030018 | 王海晴 | 30 | 梁乙凯 | 30 | 继发不孕 | 0 | 3  |
| 1 | 2017030026 | 牛传丽 | 30 | 孙兰强 | 29 | 原发不孕 | 1 | 1  |
| 3 | 2017030027 | 张聪  | 27 | 郭洪瑞 | 29 | 原发不孕 | 1 | 3  |
| 2 | 2017030047 | 王春平 | 30 | 卜瑞瑞 | 30 | 原发不孕 | 1 | 3  |
| 1 | 2017030061 | 周小艺 | 30 | 杲伟彬 | 31 | 原发不孕 | 1 | 2  |
| 1 | 2017030076 | 朱艳苓 | 38 | 张胜君 | 39 | 继发不孕 | 0 | 12 |
| 1 | 2017030078 | 孙树叶 | 28 | 李君  | 30 | 继发不孕 | 0 | 2  |
| 1 | 2017030084 | 王丽娟 | 37 | 姜传金 | 39 | 继发不孕 | 0 | 3  |
| 2 | 2017030087 | 徐恩娟 | 37 | 袁昌贵 | 36 | 原发不孕 | 1 | 4  |
| 1 | 2017030088 | 张艳  | 37 | 卢善辉 | 43 | 继发不孕 | 0 | 3  |
| 1 | 2017030089 | 翟爽  | 32 | 朱玉磊 | 35 | 原发不孕 | 1 | 3  |
| 1 | 2017030093 | 孙朝盟 | 28 | 王延峰 | 32 | 原发不孕 | 1 | 4  |
| 2 | 2017030097 | 杨景阁 | 30 | 杨有峰 | 28 | 原发不孕 | 1 | 4  |
| 3 | 2017030110 | 王桂华 | 31 | 姜俊宇 | 37 | 原发不孕 | 1 | 4  |

|   |            |     |    |     |    |      |   |    |
|---|------------|-----|----|-----|----|------|---|----|
| 2 | 2017030111 | 王喜艳 | 27 | 邵长伟 | 26 | 原发不孕 | 1 | 5  |
| 1 | 2017030117 | 楼建萌 | 29 | 谷洪波 | 28 | 原发不孕 | 1 | 6  |
| 2 | 2017030126 | 吴海燕 | 39 | 朱玉民 | 42 | 继发不孕 | 0 | 2  |
| 3 | 2017030127 | 田丹霞 | 29 | 郎福钊 | 27 | 继发不孕 | 0 | 1  |
| 3 | 2017030128 | 史长红 | 39 | 常明华 | 43 | 继发不孕 | 0 | 1  |
| 1 | 2017030129 | 王平  | 34 | 张晓东 | 38 | 继发不孕 | 0 | 7  |
| 1 | 2017030142 | 孙芳  | 34 | 张庆俊 | 27 | 继发不孕 | 0 | 3  |
| 3 | 2017030147 | 岳甜甜 | 28 | 窦峰  | 28 | 继发不孕 | 0 | 1  |
| 1 | 2017030157 | 张娜娜 | 38 | 李兆强 | 39 | 继发不孕 | 0 | 3  |
| 1 | 2017030158 | 张兰  | 40 | 李洪光 | 44 | 原发不孕 | 1 | 17 |
| 1 | 2017030163 | 费文霞 | 29 | 杨坤  | 28 | 原发不孕 | 1 | 2  |
| 2 | 2017030164 | 孙楠  | 29 | 焦贤义 | 34 | 原发不孕 | 1 | 4  |
| 2 | 2017030203 | 黄玲玲 | 26 | 胡涛涛 | 25 | 继发不孕 | 0 | 1  |
| 1 | 2017030205 | 马传花 | 29 | 王爱轻 | 30 | 原发不孕 | 1 | 3  |
| 1 | 2017030207 | 徐云鹤 | 29 | 卢兆乾 | 30 | 继发不孕 | 0 | 2  |
| 1 | 2017030210 | 王瑞  | 28 | 王福新 | 27 | 原发不孕 | 1 | 3  |
| 2 | 2017030213 | 屈衍敏 | 26 | 司呈飞 | 30 | 原发不孕 | 1 | 2  |
| 1 | 2017030219 | 董应新 | 27 | 李凯  | 29 | 原发不孕 | 1 | 5  |
| 3 | 2017030226 | 马红慧 | 39 | 孔凡彬 | 41 | 继发不孕 | 0 | 2  |
| 2 | 2017030261 | 韩秀芹 | 37 | 李廷茂 | 41 | 继发不孕 | 0 | 1  |
| 1 | 2017030279 | 公芳芳 | 26 | 乔昌圣 | 26 | 原发不孕 | 1 | 3  |
| 1 | 2017030290 | 李雪平 | 28 | 王远飞 | 27 | 原发不孕 | 1 | 4  |
| 1 | 2017030291 | 刘英  | 33 | 梁鹏  | 29 | 原发不孕 | 1 | 3  |
| 3 | 2017030292 | 赵成菊 | 39 | 马儒涛 | 39 | 继发不孕 | 0 | 7  |
| 2 | 2017030296 | 孙爱玲 | 34 | 王英奎 | 35 | 继发不孕 | 0 | 3  |
| 3 | 2017030299 | 李贞晓 | 28 | 臧书见 | 27 | 原发不孕 | 1 | 3  |
| 1 | 2017030301 | 徐梅英 | 25 | 刘萌萌 | 26 | 原发不孕 | 1 | 4  |
| 2 | 2017030306 | 唐建  | 32 | 白延林 | 32 | 继发不孕 | 0 | 2  |
| 1 | 2017030308 | 杨晶莎 | 27 | 胡连令 | 28 | 继发不孕 | 0 | 1  |
| 2 | 2017030311 | 付林林 | 27 | 孟纯民 | 41 | 继发不孕 | 0 | 1  |
| 1 | 2017030319 | 刘昕  | 33 | 刘军伟 | 31 | 原发不孕 | 1 | 5  |
| 3 | 2017030325 | 耿小妍 | 29 | 张继勇 | 29 | 原发不孕 | 1 | 5  |
| 1 | 2017030339 | 王敏  | 29 | 孙记乐 | 26 | 继发不孕 | 0 | 1  |
| 1 | 2017040001 | 徐大前 | 31 | 陈文波 | 31 | 原发不孕 | 1 | 3  |
| 1 | 2017040003 | 赵俊之 | 39 | 刘睿  | 42 | 继发不孕 | 0 | 2  |
| 3 | 2017040004 | 王国娟 | 27 | 丁同师 | 25 | 继发不孕 | 0 | 5  |
| 2 | 2017040014 | 陈军  | 36 | 胡学涛 | 35 | 继发不孕 | 0 | 3  |
| 1 | 2017040031 | 康慧娣 | 29 | 韩鹏远 | 35 | 原发不孕 | 1 | 1  |
| 3 | 2017040032 | 岳桃  | 27 | 秦川  | 30 | 继发不孕 | 0 | 3  |
| 2 | 2017040044 | 徐宝凤 | 39 | 刘学虎 | 34 | 继发不孕 | 0 | 3  |
| 1 | 2017040045 | 闫承欣 | 29 | 刘萌萌 | 26 | 原发不孕 | 1 | 2  |
| 2 | 2017040052 | 陈清云 | 38 | 孟凡龙 | 37 | 继发不孕 | 0 | 4  |
| 1 | 2017040055 | 张丛  | 29 | 王悝  | 34 | 原发不孕 | 1 | 6  |
| 1 | 2017040056 | 李世珍 | 31 | 杜世彬 | 31 | 继发不孕 | 0 | 2  |
| 2 | 2017040062 | 路垚  | 23 | 毕建军 | 23 | 继发不孕 | 0 | 1  |
| 2 | 2017040064 | 赵玉真 | 40 | 李庆国 | 35 | 继发不孕 | 0 | 1  |
| 3 | 2017040072 | 杨秀华 | 36 | 冯志瑞 | 38 | 继发不孕 | 0 | 2  |
| 1 | 2017040074 | 张韦韦 | 33 | 刘庆波 | 32 | 继发不孕 | 0 | 1  |
| 1 | 2017040076 | 王慧  | 29 | 张明  | 31 | 原发不孕 | 1 | 5  |
| 1 | 2017040079 | 杨小飞 | 28 | 尹基东 | 29 | 原发不孕 | 1 | 4  |

|   |            |     |    |     |    |      |   |    |
|---|------------|-----|----|-----|----|------|---|----|
| 1 | 2017040082 | 蒋蜜  | 29 | 陈连玄 | 29 | 继发不孕 | 0 | 1  |
| 2 | 2017040089 | 张丽丽 | 30 | 宋国辉 | 28 | 原发不孕 | 1 | 4  |
| 1 | 2017040092 | 李现敬 | 35 | 马光富 | 37 | 继发不孕 | 0 | 6  |
| 2 | 2017040111 | 刘丽丽 | 30 | 李川  | 28 | 原发不孕 | 1 | 6  |
| 1 | 2017040114 | 徐民  | 29 | 李肖  | 30 | 原发不孕 | 1 | 6  |
| 3 | 2017040131 | 王玉凤 | 34 | 夏传华 | 34 | 继发不孕 | 0 | 1  |
| 1 | 2017040148 | 牛青  | 25 | 刘巨澜 | 28 | 继发不孕 | 0 | 2  |
| 1 | 2017040149 | 刘露  | 27 | 张春海 | 28 | 继发不孕 | 0 | 1  |
| 3 | 2017040175 | 程雯雯 | 28 | 穆忍峰 | 33 | 继发不孕 | 0 | 2  |
| 1 | 2017040178 | 陈晓花 | 38 | 孔飞  | 43 | 继发不孕 | 0 | 2  |
| 2 | 2017040210 | 杜兰芳 | 34 | 王清元 | 35 | 继发不孕 | 0 | 4  |
| 2 | 2017040220 | 夏青云 | 33 | 李悦安 | 38 | 原发不孕 | 1 | 4  |
| 1 | 2017050003 | 杜金婵 | 30 | 刘宗义 | 32 | 继发不孕 | 0 | 6  |
| 1 | 2017050010 | 张运彩 | 35 | 吴大伟 | 32 | 继发不孕 | 0 | 1  |
| 1 | 2017050020 | 郝玉华 | 32 | 曹金飞 | 33 | 原发不孕 | 1 | 2  |
| 2 | 2017050039 | 张艳梅 | 28 | 梁超  | 27 | 继发不孕 | 0 | 2  |
| 1 | 2017050052 | 杨法君 | 38 | 李飞  | 33 | 继发不孕 | 0 | 6  |
| 1 | 2017050053 | 张艳菊 | 26 | 赵雪  | 27 | 原发不孕 | 1 | 3  |
| 3 | 2017050063 | 刘婷婷 | 34 | 王军  | 37 | 继发不孕 | 0 | 3  |
| 1 | 2017050069 | 韩丽  | 39 | 高建强 | 39 | 原发不孕 | 1 | 14 |
| 1 | 2017050074 | 怀松  | 29 | 刘根  | 27 | 原发不孕 | 1 | 2  |
| 1 | 2017050076 | 王先  | 26 | 贾忠要 | 27 | 原发不孕 | 1 | 2  |
| 1 | 2017050078 | 张淑娥 | 32 | 杜扩祥 | 30 | 继发不孕 | 0 | 5  |
| 2 | 2017050083 | 闫秀英 | 32 | 包海波 | 34 | 继发不孕 | 0 | 11 |
| 1 | 2017050100 | 王胜芳 | 27 | 李磊  | 28 | 原发不孕 | 1 | 4  |
| 3 | 2017050106 | 刘爱君 | 40 | 崔晋玮 | 44 | 继发不孕 | 0 | 4  |
| 1 | 2017050137 | 王素梅 | 37 | 董兴富 | 38 | 原发不孕 | 1 | 9  |
| 1 | 2017050138 | 战洪丽 | 39 | 杨占刚 | 38 | 继发不孕 | 0 | 3  |
| 3 | 2017050149 | 孙晓燕 | 39 | 韩彦勋 | 40 | 继发不孕 | 0 | 10 |
| 2 | 2017050162 | 张玉  | 31 | 周立斌 | 29 | 原发不孕 | 1 | 4  |
| 2 | 2017050164 | 张小琪 | 33 | 陈涛  | 34 | 继发不孕 | 0 | 1  |
| 1 | 2017050173 | 张金  | 30 | 吕海鹏 | 30 | 原发不孕 | 1 | 2  |
| 1 | 2017050182 | 闫海霞 | 30 | 刘阁  | 31 | 原发不孕 | 1 | 1  |
| 1 | 2017050201 | 闫艳梅 | 28 | 余肖  | 24 | 继发不孕 | 0 | 2  |
| 1 | 2017050202 | 孟庆玲 | 32 | 王昆明 | 29 | 继发不孕 | 0 | 5  |
| 1 | 2017050216 | 于路路 | 27 | 杨洋  | 27 | 原发不孕 | 1 | 5  |
| 1 | 2017050218 | 李百花 | 29 | 马小军 | 30 | 继发不孕 | 0 | 1  |
| 1 | 2017050219 | 潘玉秋 | 31 | 朱永光 | 40 | 继发不孕 | 0 | 3  |
| 1 | 2017050226 | 吴玉贞 | 36 | 龚英印 | 37 | 继发不孕 | 0 | 2  |
| 1 | 2017050228 | 林小雪 | 29 | 张磊  | 28 | 继发不孕 | 0 | 3  |
| 1 | 2017050230 | 胡春梅 | 36 | 郭瑞华 | 36 | 继发不孕 | 0 | 3  |
| 1 | 2017050244 | 康婷婷 | 29 | 王延超 | 30 | 继发不孕 | 0 | 3  |
| 1 | 2017050255 | 李玉  | 25 | 张培孟 | 27 | 原发不孕 | 1 | 5  |
| 2 | 2017050261 | 孙英英 | 29 | 黄小文 | 30 | 原发不孕 | 1 | 4  |
| 1 | 2017050269 | 张小红 | 29 | 霍明刚 | 30 | 继发不孕 | 0 | 3  |
| 1 | 2017060006 | 冯蕾  | 27 | 高华俊 | 28 | 原发不孕 | 1 | 3  |
| 1 | 2017060026 | 丛婷婷 | 29 | 董国伟 | 34 | 继发不孕 | 0 | 6  |
| 1 | 2017060027 | 李肖肖 | 29 | 李兰涛 | 26 | 原发不孕 | 1 | 7  |
| 1 | 2017060029 | 丁洁  | 28 | 王洪宪 | 28 | 原发不孕 | 1 | 3  |
| 3 | 2017060060 | 李相峰 | 38 | 李晓强 | 45 | 原发不孕 | 1 | 3  |

|   |            |     |    |     |    |      |   |    |
|---|------------|-----|----|-----|----|------|---|----|
| 1 | 2017060069 | 孙丹丹 | 30 | 刘晨  | 30 | 原发不孕 | 1 | 4  |
| 1 | 2017060074 | 韩伟伟 | 34 | 魏海峰 | 32 | 继发不孕 | 0 | 4  |
| 2 | 2017060104 | 罗兴玲 | 29 | 刘青松 | 31 | 原发不孕 | 1 | 3  |
| 2 | 2017060113 | 孟丛  | 27 | 王宏星 | 33 | 原发不孕 | 1 | 4  |
| 1 | 2017060121 | 常晶  | 30 | 李欣  | 28 | 原发不孕 | 1 | 4  |
| 1 | 2017060133 | 刘长芹 | 32 | 张洪涛 | 35 | 继发不孕 | 0 | 3  |
| 1 | 2017060135 | 苗文娟 | 31 | 张帅  | 29 | 原发不孕 | 1 | 3  |
| 1 | 2017060143 | 李莎  | 30 | 宋珂  | 31 | 原发不孕 | 1 | 2  |
| 1 | 2017060144 | 程林林 | 30 | 许红昌 | 35 | 原发不孕 | 1 | 5  |
| 1 | 2017060145 | 陈静  | 37 | 李绍良 | 36 | 原发不孕 | 1 | 2  |
| 1 | 2017060151 | 卢娟  | 29 | 秦承凯 | 30 | 原发不孕 | 1 | 2  |
| 1 | 2017060152 | 冀金燕 | 32 | 谭斌  | 34 | 继发不孕 | 0 | 2  |
| 3 | 2017060163 | 张贵霞 | 31 | 田伟伟 | 32 | 继发不孕 | 0 | 2  |
| 1 | 2017060167 | 付淑梅 | 35 | 耿文祥 | 33 | 继发不孕 | 0 | 7  |
| 3 | 2017060176 | 王炼  | 32 | 王斌  | 30 | 继发不孕 | 0 | 1  |
| 1 | 2017060184 | 于艳  | 39 | 高超  | 37 | 继发不孕 | 0 | 1  |
| 1 | 2017060200 | 吕梅杰 | 25 | 刘加勇 | 28 | 原发不孕 | 1 | 1  |
| 1 | 2017060202 | 郝玉婷 | 37 | 杨亮  | 41 | 继发不孕 | 0 | 4  |
| 1 | 2017060215 | 刘晋丽 | 30 | 张成艳 | 30 | 继发不孕 | 0 | 3  |
| 1 | 2017060231 | 李杰婷 | 30 | 慕晓冬 | 29 | 原发不孕 | 1 | 2  |
| 2 | 2017060234 | 乔洪珊 | 34 | 刘伟  | 36 | 继发不孕 | 0 | 2  |
| 1 | 2017060252 | 武璐  | 37 | 孙萌  | 36 | 继发不孕 | 0 | 9  |
| 1 | 2017060259 | 王玫  | 27 | 丁建成 | 26 | 继发不孕 | 0 | 1  |
| 1 | 2017060261 | 路士平 | 28 | 周长易 | 28 | 原发不孕 | 1 | 6  |
| 2 | 2017060267 | 李明玉 | 27 | 张红来 | 25 | 原发不孕 | 1 | 3  |
| 1 | 2017060297 | 王莹莹 | 29 | 王琪  | 28 | 原发不孕 | 1 | 5  |
| 1 | 2017060301 | 姚欣  | 24 | 周国峰 | 24 | 继发不孕 | 0 | 2  |
| 1 | 2017060302 | 刘媛媛 | 30 | 张宝平 | 31 | 继发不孕 | 0 | 7  |
| 1 | 2017060325 | 陈曦  | 34 | 刘健  | 32 | 原发不孕 | 1 | 1  |
| 3 | 2017070025 | 刘成丽 | 34 | 任光全 | 39 | 原发不孕 | 1 | 5  |
| 3 | 2017070028 | 毕秀云 | 40 | 王辉  | 41 | 继发不孕 | 0 | 2  |
| 1 | 2017070033 | 李婷婷 | 39 | 郭磊  | 37 | 继发不孕 | 0 | 11 |
| 1 | 2017070035 | 李巧丽 | 25 | 路茂井 | 27 | 原发不孕 | 1 | 3  |
| 1 | 2017070048 | 曹瑞平 | 30 | 郝勇  | 28 | 继发不孕 | 0 | 2  |
| 1 | 2017070051 | 王敏  | 31 | 刘文  | 35 | 原发不孕 | 1 | 3  |
| 1 | 2017070055 | 聂丽燕 | 40 | 方永震 | 41 | 继发不孕 | 0 | 1  |
| 1 | 2017070079 | 鲁云霞 | 34 | 罗震  | 35 | 原发不孕 | 1 | 6  |
| 1 | 2017070081 | 田秀玉 | 25 | 陈旭瑞 | 27 | 原发不孕 | 1 | 2  |
| 2 | 2017070089 | 王瑞雪 | 30 | 孔鹏  | 29 | 继发不孕 | 0 | 2  |
| 2 | 2017070095 | 伊西玲 | 31 | 刘磊  | 37 | 原发不孕 | 1 | 3  |
| 1 | 2017070101 | 刘雁林 | 30 | 赵伟  | 29 | 原发不孕 | 1 | 4  |
| 1 | 2017070104 | 朱秀灵 | 29 | 杜成汪 | 29 | 继发不孕 | 0 | 3  |
| 2 | 2017070105 | 陈晓霞 | 40 | 吕海峰 | 39 | 继发不孕 | 0 | 1  |
| 1 | 2017070109 | 徐文凤 | 32 | 李伟  | 34 | 继发不孕 | 0 | 3  |
| 3 | 2017070122 | 马媛  | 29 | 张秋福 | 28 | 原发不孕 | 1 | 5  |
| 1 | 2017070128 | 王孟艳 | 27 | 吴京州 | 26 | 继发不孕 | 0 | 3  |
| 1 | 2017070151 | 葛锦秀 | 34 | 亓玉春 | 35 | 继发不孕 | 0 | 5  |
| 1 | 2017070159 | 郭伟卫 | 32 | 石法豹 | 30 | 继发不孕 | 0 | 3  |
| 1 | 2017070161 | 邹丽霞 | 31 | 朱广超 | 27 | 继发不孕 | 0 | 1  |
| 2 | 2017070162 | 郑真真 | 27 | 王振国 | 26 | 继发不孕 | 0 | 3  |

|   |            |     |    |     |    |      |   |    |
|---|------------|-----|----|-----|----|------|---|----|
| 1 | 2017070166 | 马学飞 | 32 | 李佳  | 31 | 原发不孕 | 1 | 4  |
| 1 | 2017070168 | 齐晓惠 | 32 | 杨乐义 | 31 | 继发不孕 | 0 | 3  |
| 1 | 2017070170 | 商娜娜 | 30 | 高磊  | 28 | 原发不孕 | 1 | 1  |
| 1 | 2017070179 | 陈丽敏 | 29 | 田博  | 30 | 继发不孕 | 0 | 1  |
| 1 | 2017070189 | 孔秀荣 | 38 | 杨勇  | 43 | 继发不孕 | 0 | 2  |
| 1 | 2017070192 | 亓敏  | 26 | 景飞  | 28 | 原发不孕 | 1 | 3  |
| 1 | 2017070207 | 郭敏  | 29 | 王龙贤 | 28 | 原发不孕 | 1 | 4  |
| 1 | 2017070219 | 张艳蕊 | 27 | 韩泽强 | 27 | 继发不孕 | 0 | 4  |
| 1 | 2017070227 | 常莹莹 | 37 | 尹训刚 | 36 | 继发不孕 | 0 | 5  |
| 1 | 2017070239 | 于晓晓 | 28 | 赵立强 | 31 | 原发不孕 | 1 | 3  |
| 1 | 2017070240 | 左俊彩 | 27 | 金忠良 | 26 | 继发不孕 | 0 | 1  |
| 1 | 2017070254 | 孙珍淑 | 38 | 张洪余 | 38 | 继发不孕 | 0 | 3  |
| 1 | 2017070255 | 李雪花 | 28 | 王家勋 | 27 | 继发不孕 | 0 | 4  |
| 2 | 2017070258 | 刘芳  | 30 | 王瑞华 | 29 | 原发不孕 | 1 | 2  |
| 1 | 2017070263 | 宋春芬 | 27 | 康茂勇 | 29 | 原发不孕 | 1 | 5  |
| 1 | 2017070270 | 付绍丽 | 30 | 高峰  | 29 | 继发不孕 | 0 | 2  |
| 1 | 2017070279 | 米继盼 | 33 | 王增宽 | 35 | 继发不孕 | 0 | 3  |
| 1 | 2017080025 | 侯静静 | 25 | 王震  | 27 | 原发不孕 | 1 | 3  |
| 1 | 2017080028 | 王夏  | 36 | 孙仲夏 | 40 | 原发不孕 | 1 | 2  |
| 1 | 2017080029 | 王静  | 33 | 李俊福 | 52 | 继发不孕 | 0 | 13 |
| 1 | 2017080031 | 卢娜  | 27 | 王正男 | 27 | 原发不孕 | 1 | 5  |
| 1 | 2017080038 | 张楠  | 33 | 刘玉海 | 34 | 继发不孕 | 0 | 2  |
| 1 | 2017080040 | 吕其兰 | 34 | 于德胜 | 39 | 继发不孕 | 0 | 2  |
| 1 | 2017080060 | 宫玉荣 | 30 | 解维轮 | 30 | 原发不孕 | 1 | 3  |
| 1 | 2017080071 | 代倩倩 | 28 | 郭瑞宇 | 29 | 原发不孕 | 1 | 2  |
| 1 | 2017080072 | 程守珍 | 24 | 李松  | 26 | 原发不孕 | 1 | 2  |
| 1 | 2017080080 | 刘翠  | 35 | 李俊涛 | 35 | 继发不孕 | 0 | 2  |
| 1 | 2017080094 | 师文  | 30 | 沈晓旭 | 33 | 原发不孕 | 1 | 3  |
| 2 | 2017080096 | 姜清清 | 30 | 魏忠强 | 28 | 原发不孕 | 1 | 2  |
| 1 | 2017080099 | 杨晓妮 | 38 | 唐晓勇 | 40 | 继发不孕 | 0 | 1  |
| 1 | 2017080102 | 杨庆黎 | 26 | 刘志  | 27 | 继发不孕 | 0 | 3  |
| 1 | 2017080109 | 陶恒玉 | 30 | 杜兴强 | 30 | 原发不孕 | 1 | 4  |
| 1 | 2017080136 | 王爱玲 | 28 | 李新全 | 27 | 继发不孕 | 0 | 1  |
| 1 | 2017080152 | 王诗凤 | 24 | 李殿金 | 24 | 原发不孕 | 1 | 2  |
| 1 | 2017080154 | 隋桂花 | 36 | 杨永刚 | 37 | 继发不孕 | 0 | 4  |
| 1 | 2017080169 | 余宁宁 | 24 | 王振亚 | 24 | 继发不孕 | 0 | 3  |
| 1 | 2017080170 | 郭素霞 | 40 | 韦建辉 | 40 | 继发不孕 | 0 | 3  |
| 1 | 2017080176 | 吕唯琳 | 26 | 赵晓明 | 31 | 原发不孕 | 1 | 2  |
| 1 | 2017080177 | 付丽娜 | 29 | 郭洪峰 | 35 | 继发不孕 | 0 | 3  |
| 3 | 2017080187 | 王贞  | 35 | 刘卫生 | 38 | 继发不孕 | 0 | 3  |
| 1 | 2017080189 | 李雪平 | 28 | 王远飞 | 27 | 原发不孕 | 1 | 4  |
| 1 | 2017080199 | 范金兰 | 33 | 李福龙 | 32 | 继发不孕 | 0 | 1  |
| 2 | 2017080204 | 耿双  | 27 | 刘水  | 23 | 原发不孕 | 1 | 2  |
| 1 | 2017080217 | 颜红  | 27 | 王非  | 26 | 原发不孕 | 1 | 2  |
| 1 | 2017080219 | 张帅  | 29 | 王军  | 31 | 原发不孕 | 1 | 1  |
| 1 | 2017080223 | 张云  | 26 | 郭强  | 27 | 原发不孕 | 1 | 2  |
| 1 | 2017080224 | 张文文 | 28 | 葛荣才 | 27 | 继发不孕 | 0 | 3  |
| 1 | 2017080231 | 安海燕 | 39 | 崔杰  | 41 | 继发不孕 | 0 | 2  |
| 1 | 2017080237 | 刘思含 | 28 | 李洪野 | 30 | 原发不孕 | 1 | 1  |
| 1 | 2017080239 | 王海晶 | 27 | 程超  | 30 | 原发不孕 | 1 | 2  |

|   |            |     |    |     |    |      |   |   |
|---|------------|-----|----|-----|----|------|---|---|
| 3 | 2017080268 | 仪美娟 | 35 | 陈中磊 | 36 | 继发不孕 | 0 | 1 |
| 3 | 2017080279 | 毛甜甜 | 30 | 袁涛  | 32 | 原发不孕 | 1 | 6 |
| 1 | 2017090012 | 卢艳慧 | 35 | 张良孟 | 35 | 继发不孕 | 0 | 1 |
| 1 | 2017090031 | 杨晓娇 | 26 | 刘华  | 28 | 原发不孕 | 1 | 7 |
| 1 | 2017090033 | 刁莉  | 29 | 刘帅  | 29 | 继发不孕 | 0 | 1 |
| 1 | 2017090036 | 谷增燕 | 33 | 张敏  | 36 | 继发不孕 | 0 | 1 |
| 1 | 2017090059 | 于晓燕 | 31 | 张永祥 | 30 | 原发不孕 | 1 | 3 |
| 1 | 2017090076 | 周玉娟 | 27 | 张林海 | 28 | 原发不孕 | 1 | 4 |
| 1 | 2017090086 | 杜雨婷 | 27 | 李亚龙 | 28 | 原发不孕 | 1 | 4 |
| 1 | 2017090108 | 贾菲菲 | 28 | 傅博  | 31 | 原发不孕 | 1 | 4 |
| 1 | 2017090113 | 马晶  | 30 | 梁梓杨 | 26 | 原发不孕 | 1 | 1 |
| 1 | 2017090122 | 于亚妮 | 28 | 邹德政 | 31 | 原发不孕 | 1 | 4 |
| 2 | 2017090142 | 王焕焕 | 26 | 张伟红 | 25 | 继发不孕 | 0 | 4 |
| 1 | 2017090145 | 高杨  | 23 | 鹿伦富 | 25 | 原发不孕 | 1 | 1 |
| 2 | 2017090148 | 张茂嫒 | 29 | 赵海宽 | 28 | 原发不孕 | 1 | 3 |
| 2 | 2017090157 | 张璟  | 33 | 周明吉 | 32 | 原发不孕 | 1 | 4 |
| 3 | 2017090170 | 王楠  | 32 | 杜书雷 | 36 | 原发不孕 | 1 | 2 |
| 1 | 2017090182 | 韩学艳 | 33 | 王健  | 33 | 原发不孕 | 1 | 2 |
| 1 | 2017090186 | 高瑶瑶 | 34 | 姜会海 | 34 | 继发不孕 | 0 | 3 |
| 3 | 2017090202 | 吴磊  | 34 | 李磊  | 38 | 原发不孕 | 1 | 3 |
| 1 | 2017090217 | 卢路路 | 26 | 韩琦俊 | 24 | 原发不孕 | 1 | 3 |
| 1 | 2017090221 | 赵霏霏 | 35 | 滕炎树 | 33 | 原发不孕 | 1 | 7 |
| 1 | 2017090229 | 张仕红 | 32 | 刘成龙 | 32 | 继发不孕 | 0 | 2 |
| 1 | 2017090231 | 王颖  | 37 | 梁乃勤 | 50 | 继发不孕 | 0 | 1 |
| 1 | 2017090237 | 高盼盼 | 28 | 孟令东 | 29 | 原发不孕 | 1 | 3 |
| 1 | 2017090239 | 陈慧敏 | 26 | 刘继标 | 27 | 原发不孕 | 1 | 3 |
| 3 | 2017090246 | 刘太花 | 35 | 王殿才 | 45 | 继发不孕 | 0 | 2 |
| 1 | 2017090258 | 马天燕 | 34 | 李云亮 | 34 | 继发不孕 | 0 | 2 |
| 1 | 2017090272 | 王军  | 28 | 房磊  | 30 | 继发不孕 | 0 | 2 |
| 1 | 2017100016 | 肖娇妹 | 22 | 姜雪坤 | 24 | 原发不孕 | 1 | 4 |
| 1 | 2017100018 | 李惠慧 | 28 | 毕玉镇 | 29 | 原发不孕 | 1 | 2 |
| 1 | 2017100022 | 夏美娟 | 40 | 陈新华 | 42 | 继发不孕 | 0 | 2 |
| 1 | 2017100030 | 韩丽  | 34 | 刘小春 | 32 | 继发不孕 | 0 | 3 |
| 2 | 2017100036 | 黄丽  | 39 | 付似孔 | 37 | 继发不孕 | 0 | 1 |
| 1 | 2017100037 | 王兆霞 | 38 | 解西宁 | 34 | 继发不孕 | 0 | 3 |
| 1 | 2017100038 | 段俊霞 | 39 | 车建模 | 44 | 继发不孕 | 0 | 5 |
| 1 | 2017100040 | 李丹丹 | 28 | 边晨辉 | 27 | 原发不孕 | 1 | 2 |
| 2 | 2017100046 | 陈琳  | 33 | 杨达  | 31 | 原发不孕 | 1 | 5 |
| 1 | 2017100047 | 刘芬利 | 29 | 李磊磊 | 31 | 继发不孕 | 0 | 1 |
| 1 | 2017100068 | 王晶  | 29 | 于海帅 | 34 | 原发不孕 | 1 | 3 |
| 1 | 2017100087 | 冯鑫安 | 34 | 朱振东 | 36 | 原发不孕 | 1 | 2 |
| 1 | 2017100090 | 刘瑞法 | 29 | 孙长保 | 29 | 原发不孕 | 1 | 5 |
| 3 | 2017100122 | 翟新菊 | 36 | 李勇  | 41 | 继发不孕 | 0 | 1 |
| 1 | 2017100123 | 南霞  | 26 | 李宗波 | 28 | 原发不孕 | 1 | 2 |
| 3 | 2017100125 | 徐帆  | 24 | 刘科显 | 25 | 继发不孕 | 0 | 2 |
| 3 | 2017100126 | 张倩  | 32 | 赵佳炜 | 32 | 继发不孕 | 0 | 2 |
| 3 | 2017100127 | 张美  | 28 | 王澍  | 38 | 原发不孕 | 1 | 1 |
| 3 | 2017100137 | 刘冬菊 | 38 | 肖峰彬 | 42 | 继发不孕 | 0 | 3 |
| 2 | 2017100151 | 程爽  | 39 | 吕明华 | 44 | 继发不孕 | 0 | 1 |
| 1 | 2017100159 | 李洁  | 30 | 龙宝  | 30 | 原发不孕 | 1 | 3 |

|   |            |     |    |     |    |      |   |    |
|---|------------|-----|----|-----|----|------|---|----|
| 1 | 2017100162 | 石迎春 | 32 | 房昭进 | 32 | 原发不孕 | 1 | 5  |
| 1 | 2017100168 | 王贝贝 | 27 | 孔德龙 | 28 | 原发不孕 | 1 | 5  |
| 1 | 2017100171 | 曹德红 | 37 | 李国  | 38 | 继发不孕 | 0 | 6  |
| 1 | 2017100184 | 宋焕焕 | 31 | 刘洋  | 29 | 继发不孕 | 0 | 1  |
| 1 | 2017100198 | 王胜芳 | 27 | 李磊  | 28 | 原发不孕 | 1 | 4  |
| 1 | 2017100207 | 马静静 | 27 | 宋玉祥 | 27 | 原发不孕 | 1 | 1  |
| 1 | 2017100208 | 姜丽巧 | 34 | 王涛  | 32 | 继发不孕 | 0 | 2  |
| 1 | 2017100218 | 吴彦霞 | 35 | 王海明 | 31 | 继发不孕 | 0 | 1  |
| 1 | 2017100238 | 郭丛丛 | 36 | 邵立丙 | 37 | 原发不孕 | 1 | 3  |
| 1 | 2017100245 | 贾玉珊 | 26 | 李伟  | 27 | 继发不孕 | 0 | 3  |
| 1 | 2017110002 | 高莉丽 | 31 | 陈晨  | 32 | 原发不孕 | 1 | 2  |
| 3 | 2017110007 | 赵传菊 | 32 | 陈吉良 | 31 | 继发不孕 | 0 |    |
| 3 | 2017110018 | 田银霞 | 34 | 马延波 | 32 | 原发不孕 | 1 | 2  |
| 3 | 2017110020 | 全玉荣 | 35 | 孙呈强 | 36 | 继发不孕 | 0 | 3  |
| 1 | 2017110030 | 袁延荣 | 34 | 卢庆功 | 40 | 继发不孕 | 0 | 7  |
| 3 | 2017110053 | 王小霞 | 28 | 纪丰召 | 32 | 继发不孕 | 0 | 1  |
| 1 | 2017110073 | 王娟  | 39 | 梁光  | 40 | 继发不孕 | 0 | 2  |
| 3 | 2017110074 | 赵新杰 | 36 | 曹宁  | 36 | 继发不孕 | 0 | 1  |
| 1 | 2017110077 | 王静  | 25 | 张庆杰 | 28 | 原发不孕 | 1 | 4  |
| 3 | 2017110078 | 刘俐  | 30 | 焦峰  | 37 | 原发不孕 | 1 | 1  |
| 3 | 2017110086 | 王德翠 | 34 | 王帮全 | 35 | 继发不孕 | 0 | 1  |
| 1 | 2017110097 | 徐磊  | 33 | 范市委 | 32 | 继发不孕 | 0 | 5  |
| 1 | 2017110119 | 吴玉贞 | 36 | 龚英印 | 37 | 继发不孕 | 0 | 2  |
| 1 | 2017110121 | 马新玉 | 23 | 张甲志 | 27 | 原发不孕 | 1 | 3  |
| 1 | 2017110134 | 王娟  | 29 | 钱兵  | 28 | 原发不孕 | 1 | 3  |
| 1 | 2017110137 | 徐晓梅 | 32 | 姜彬  | 31 | 继发不孕 | 0 | 1  |
| 1 | 2017110141 | 刘希香 | 40 | 魏祥志 | 42 | 继发不孕 | 0 | 1  |
| 1 | 2017110142 | 矫晓晓 | 29 | 徐宗乾 | 34 | 原发不孕 | 1 | 3  |
| 1 | 2017110156 | 王芳  | 24 | 杨凯  | 28 | 原发不孕 | 1 | 2  |
| 1 | 2017110182 | 刘文华 | 39 | 杨建华 | 37 | 原发不孕 | 1 | 12 |
| 1 | 2017110184 | 边玉梅 | 28 | 王乃顺 | 30 | 继发不孕 | 0 | 3  |
| 1 | 2017110195 | 陈元元 | 33 | 徐保华 | 35 | 继发不孕 | 0 | 2  |
| 1 | 2017110204 | 杜金玲 | 35 | 焦志刚 | 37 | 继发不孕 | 0 | 1  |
| 1 | 2017110216 | 陈晓花 | 39 | 孔飞  | 43 | 继发不孕 | 0 | 2  |
| 1 | 2017110223 | 刘琳  | 35 | 林书峰 | 36 | 继发不孕 | 0 | 1  |
| 2 | 2017110271 | 任秀娟 | 27 | 王延林 | 27 | 原发不孕 | 1 | 2  |
| 1 | 2017110282 | 吕亚楠 | 26 | 张新鹏 | 23 | 继发不孕 | 0 | 2  |
| 1 | 2017110283 | 张静丽 | 24 | 牛凤照 | 23 | 继发不孕 | 0 | 2  |
| 3 | 2017110290 | 张慧芳 | 40 | 党传振 | 41 | 继发不孕 | 0 | 1  |
| 3 | 2017110292 | 鲍丛丛 | 30 | 梁延章 | 33 | 继发不孕 | 0 | 3  |
| 3 | 2017110305 | 刘珊珊 | 36 | 姜毅  | 34 | 继发不孕 | 0 |    |
| 3 | 2017120022 | 田芹  | 32 | 亓越  | 38 | 继发不孕 | 0 | 3  |
| 1 | 2017120028 | 柴永英 | 37 | 田效军 | 34 | 继发不孕 | 0 | 5  |
| 1 | 2017120065 | 赖欣  | 38 | 曹一鸣 | 43 | 继发不孕 | 0 | 4  |
| 2 | 2017120087 | 徐秋云 | 34 | 朱永峰 | 36 | 继发不孕 | 0 | 2  |
| 3 | 2017120094 | 耿艳艳 | 34 | 黄文起 | 33 | 继发不孕 | 0 | 3  |
| 3 | 2017120099 | 王艳  | 30 | 张吉峰 | 33 | 继发不孕 | 0 | 1  |
| 1 | 2017120105 | 范芳芳 | 35 | 张正光 | 35 | 继发不孕 | 0 | 3  |
| 1 | 2017120112 | 刘燕  | 31 | 吴庆伟 | 33 | 原发不孕 | 1 | 4  |
| 1 | 2017120117 | 王云辉 | 38 | 郑召环 | 39 | 继发不孕 | 0 | 4  |

|   |            |     |    |     |    |      |   |   |
|---|------------|-----|----|-----|----|------|---|---|
| 1 | 2017120133 | 陈晓霞 | 40 | 吕海峰 | 40 | 继发不孕 | 0 | 1 |
| 1 | 2017120134 | 吴艳梦 | 27 | 单连广 | 32 | 继发不孕 | 0 | 1 |
| 1 | 2017120148 | 肖永华 | 33 | 苏宝广 | 36 | 原发不孕 | 1 | 1 |
| 3 | 2017120149 | 李云芳 | 28 | 亓帅  | 30 | 原发不孕 | 1 | 1 |
| 1 | 2017120152 | 张亚楠 | 24 | 田飞  | 27 | 继发不孕 | 0 | 3 |
| 2 | 2017120153 | 刘立杰 | 31 | 黄建奎 | 31 | 原发不孕 | 1 |   |
| 2 | 2017120159 | 周宁宁 | 28 | 王廷民 | 27 | 原发不孕 | 1 |   |
| 3 | 2017120184 | 袁艳  | 34 | 毕鹏飞 | 37 | 原发不孕 | 1 | 9 |
| 1 | 2017120186 | 王娟  | 34 | 陈磊  | 35 | 继发不孕 | 0 | 2 |
| 1 | 2017120191 | 马艳玲 | 33 | 段超  | 35 | 继发不孕 | 0 | 6 |
| 1 | 2017120195 | 赵玲玉 | 27 | 高岩亮 | 28 | 继发不孕 | 0 | 1 |
| 3 | 2017120237 | 刘静  | 40 | 王锡亮 | 55 | 继发不孕 | 0 | 2 |
| 2 | 2017120241 | 高霞  | 28 | 孙玉广 | 29 | 原发不孕 | 1 | 5 |
| 1 | 2017120248 | 韩瑜  | 22 | 张书增 | 23 | 原发不孕 | 1 | 1 |
| 2 | 2017120259 | 张萌  | 30 | 苏延慧 | 33 | 原发不孕 | 1 | 6 |
| 1 | 2017120260 | 李传花 | 38 | 李海军 | 40 | 继发不孕 | 0 | 4 |
| 3 | 2017120267 | 邓祥红 | 39 | 陈福海 | 41 | 继发不孕 | 0 | 1 |
| 1 | 2018010023 | 徐莹莹 | 31 | 孙春亮 | 35 | 继发不孕 | 0 | 3 |
| 3 | 2018010035 | 巩倩倩 | 27 | 陈德福 | 28 | 原发不孕 | 1 | 2 |
| 3 | 2018010044 | 徐立婧 | 30 | 孙超  | 35 | 原发不孕 | 1 | 2 |
| 1 | 2018010072 | 张馨月 | 37 | 汤东  | 32 | 继发不孕 | 0 | 3 |
| 1 | 2018010083 | 孙丹丹 | 32 | 刘敬佩 | 31 | 继发不孕 | 0 | 1 |
| 3 | 2018010101 | 刘梅  | 38 | 周锋波 | 38 | 继发不孕 | 0 | 7 |
| 2 | 2018010110 | 王夏梦 | 27 | 康冬冬 | 27 | 继发不孕 | 0 | 2 |
| 3 | 2018010120 | 宫晓娜 | 39 | 刘冀中 | 41 | 继发不孕 | 0 | 2 |
| 1 | 2018010142 | 郑岩  | 30 | 刘致宇 | 30 | 原发不孕 |   | 4 |
| 3 | 2018010153 | 孙灵仙 | 40 | 冯文清 | 45 | 继发不孕 | 0 | 1 |



| 体重指数  | 基础FSH | 基础E2 | 基础P  | 基础PRL  | 基础LH  | 基础T   | 不孕因素      | 病历号           |
|-------|-------|------|------|--------|-------|-------|-----------|---------------|
| 20.31 | 5.07  | 38   | 0.35 |        | 2.23  |       | 输卵管因素     | 3701320001868 |
| 25.39 | 6.58  | 31   | 0.37 | 7.57   | 7.26  | 0.38  |           | 3701320002443 |
| 20.66 | 6.95  | 26   | 0.34 | 7.53   | 4.6   | 0.37  |           | 3701320002541 |
| 22.89 | 6.29  | 38   | 0.15 | 10.29  | 6     | 0.26  | 输卵管因素     | 3701320002498 |
| 20.32 | 6.28  | 8    | 0.11 |        | 3.76  |       | 输卵管因素     | 3701320002564 |
| 19.92 | 5.45  | 42   | 0.27 | 9.57   | 5.83  | 21.83 | 输卵管因素     | 3701320002581 |
| 21.88 | 6.88  | 56   | 1.33 | 308.9  | 4.72  | 0.68  | 子宫内位异位    | 3701320002655 |
| 27.34 | 6.67  | 36   | 0.36 |        | 2.06  |       | 输卵管因素     | 3701320003293 |
| 21.97 | 6.84  | 47   | 0.20 | 275.18 | 7.51  | 1.6   | 多囊卵巢综合    | 3701320004148 |
| 18.43 | 6.52  | 67   | 0.46 | 6.91   | 2.35  | 1.74  | 输卵管因素     | 3701320003159 |
| 22.04 | 8.45  | 48   | 0.12 |        | 5.4   | 0.41  |           | 3701320002871 |
| 24.03 | 9.60  | 11   | 0.08 |        | 3.2   | 0.21  | 输卵管因素     | 3701320003113 |
| 19.03 | 9.36  | 33   | 0.25 |        | 4.84  |       | 输卵管因素     | 3701320003200 |
| 31.96 | 6.25  | 15   | 0.08 | 15.3   | 10.2  | 0.56  | 多囊卵巢综合    | 3701320003090 |
| 18.37 | 7.17  | 23   | 0.10 |        | 2.67  |       | 输卵管因素     | 3701320003099 |
| 20.08 | 4.24  | 80   | 0.14 |        | 6.63  |       | 输卵管因素     | 3701320003071 |
| 18.42 | 6.48  | 13   | 0.18 | 10.3   | 5.6   | 0.78  | 输卵管因素     | 3701320003111 |
| 26.7  | 6.44  | 11   | 0.08 | 11.2   | 2.69  | 1.04  | 输卵管因素     | 3701320003082 |
| 22.03 | 4.25  | 49   | 0.18 | 12.3   | 4.02  | 0.23  | 输卵管因素     | 3701320003137 |
| 22.04 | 5.45  | 78   | 0.08 | 250.16 | 5.6   | 0.56  | 输卵管因素     | 3701320003146 |
| 23.44 | 5.07  | 32   | 0.47 | 33.6   | 7.48  | 0.56  | 多囊卵巢综合    | 3701320003552 |
| 20.96 | 6.13  | 32   | 0.35 |        | 4.36  |       | 输卵管因素     | 3701320003388 |
| 17.53 | 5.16  | 73   | 0.23 |        | 4.93  |       | 输卵管因素     | 3701320003119 |
| 20.94 | 5.03  | 63   | 0.37 |        | 5.8   |       | 输卵管因素     | 3701320003120 |
| 20.28 | 6.18  | 54   | 0.19 | 15.52  | 2.11  |       | 输卵管因素     | 3701320003144 |
| 24.09 | 6.58  | 13   | 0.20 |        | 2.6   | 0.25  | 输卵管因素     | 3701320002644 |
| 21.48 | 7.18  | 25   | 0.15 | 16.13  | 4.3   | 0.23  | 输卵管因素     | 3701320002416 |
| 22.19 | 6.04  | 14   | 0.35 |        | 6.98  | 1.67  | 输卵管因素     | 3701320003122 |
| 21.48 | 6.24  | 38   | 0.22 |        | 5.57  |       | 输卵管因素     | 3701320003121 |
| 23.44 | 6.25  | 39   | 1.03 |        | 2.79  | 0.87  | 多囊卵巢综合    | 3701320003207 |
| 20.86 | 6.04  | 68   | 0.29 |        | 9.62  |       |           | 3701320003181 |
| 22.94 | 6.67  | 37   | 0.54 |        | 2.91  | 0.87  |           | 3701320003202 |
| 22.58 | 6.46  | 32   | 0.07 |        | 3.6   | 0.25  |           | 3701320003199 |
| 26.89 | 6.91  | 22   | 0.08 | 21.3   | 5.4   | 0.58  | 子宫内位异位    | 3701320002331 |
| 22.22 | 6.10  | 86   | 0.63 |        | 11.61 |       | 多囊卵巢综合    | 3701320003123 |
| 23.14 | 5.13  | 64   | 0.95 |        | 4.39  | 1.63  | 慢性盆腔炎,多   | 3701320003219 |
| 41.02 | 5.57  | 21   | 0.08 | 32.3   | 4.2   | 0.25  | 多囊卵巢综合    | 3701320002386 |
| 22.23 | 5.76  | 37   | 0.72 |        | 3.7   | 0.97  | 输卵管因素     | 3701320003263 |
| 19.49 | 4.55  | 18   | 0.58 |        | 6.86  |       | 输卵管因素     | 3701320003150 |
| 22.04 | 4.38  | 22   | 0.08 |        | 3.6   | 0.24  | 输卵管因素     | 3701320003164 |
| 22.58 | 5.09  | 8    | 0.07 | 10     | 3.25  | 0.25  | 多囊卵巢综合    | 3701320001183 |
| 20.82 | 7.35  | 78   | 0.23 |        | 4.42  |       | 子宫内位异位    | 3701320003220 |
| 18.73 | 4.60  | 38   | 0.25 | 22.48  | 5.24  |       | 输卵管因素     | 3701320003170 |
| 25.22 | 5.23  | 22   | 0.27 |        | 2.22  |       | 输卵管因素     | 3701320003183 |
| 22.49 | 4.56  | 65   | 0.24 |        | 2.18  | 0.5   | 子宫内位异位    | 3701320000527 |
| 18.44 | 5.73  | 46   | 0.12 |        | 2.93  |       | 输卵管因素     | 3701320003258 |
| 39.18 | 4.73  | 52   | 1.10 |        | 7.91  | 0.37  | 多囊卵巢综合    | 3701320003173 |
| 22.04 | 5.11  | 29   | 0.60 |        | 3.98  | 0.48  | 输卵管因素     | 3701320003224 |
| 20.31 | 7.28  | 40   | 1.31 |        | 5.11  | 1.11  | 高龄, 输卵管因素 | 3701320001931 |

|       |       |    |      |      |       |      |         |               |
|-------|-------|----|------|------|-------|------|---------|---------------|
|       | 7.03  | 40 | 0.56 |      | 4.94  |      | 输卵管因素   | 3701320003171 |
| 19.88 | 8.11  | 17 | 0.26 |      | 6.05  | 0.15 | 输卵管因素   | 3701320003250 |
| 25.22 | 8.36  | 32 | 0.82 |      | 6.18  |      | 输卵管因素   | 3701320000304 |
| 39.04 | 8.67  | 17 | 0.45 |      | 5.52  |      | 输卵管因素   | 3701320003470 |
| 23.62 | 9.91  | 44 | 0.75 |      | 7.38  |      | 多囊卵巢综合  | 3701320003274 |
| 22.04 | 7.28  | 33 | 0.76 |      | 6.66  | 0.44 | 输卵管因素   | 3701320003259 |
| 19.72 | 8.73  | 59 | 0.47 |      | 7.99  | 2.07 | 输卵管因素   | 3701320003227 |
| 22.6  | 7.57  | 13 | 0.25 |      | 3.2   | 0.25 | 输卵管因素   | 3701320003336 |
| 27.06 | 8.64  | 29 | 0.23 |      | 7.5   |      | 输卵管因素   | 3701320002561 |
| 32.46 | 7.14  | 43 | 0.22 |      | 5.98  |      | 输卵管因素   | 3701320003237 |
| 22.22 | 8.11  | 28 | 0.19 |      | 7.19  | 0.4  | 输卵管因素   | 3701320003267 |
| 23.05 | 7.25  | 50 | 0.34 |      | 7.11  | 0.46 | 慢性盆腔炎,多 | 3701320003257 |
| 22.66 | 9.67  | 32 | 0.61 |      | 2.96  |      | 慢性宫颈炎   | 3701320003225 |
| 18.75 | 10.11 | 20 | 1.50 |      | 2.38  | 1.21 | 输卵管因素   | 3701320003284 |
| 17.3  | 5.42  | 55 | 0.71 |      | 6.74  |      | 输卵管因素   | 3701320002451 |
| 24.65 | 5.28  | 31 | 0.08 |      | 5.03  | 0.3  | 输卵管因素   | 3701320003242 |
| 23.88 | 8.33  | 31 | 0.27 |      | 6.41  |      | 输卵管因素   | 3701320003300 |
| 41.4  | 7.37  | 39 | 0.12 |      | 6.06  | 14.3 | 输卵管因素   | 3701320002332 |
| 24.75 | 7.76  | 34 | 0.37 |      | 7.19  |      | 输卵管因素   | 3701320003211 |
| 23.63 | 5.1   | 43 | 0.33 | 8.47 | 2.96  |      | 输卵管因素   | 3701320003266 |
| 20.57 | 9.90  | 34 | 1.04 |      | 4.35  |      | 输卵管因素   | 3701320003341 |
| 28.6  | 7.26  | 28 | 0.29 |      | 9.02  |      | 多囊卵巢综合  | 3701320003262 |
| 20.82 | 6.34  | 24 | 0.60 |      | 6.17  | 1.35 | 输卵管因素   | 3701320003320 |
| 23.05 | 9.27  | 33 | 0.49 |      | 2.76  | 1.04 | 输卵管因素   | 3701320003286 |
| 20.28 | 10.88 | 41 | 0.40 |      | 4.2   |      | 慢性盆腔炎,转 | 3701320003337 |
| 21.09 | 7.08  | 91 | 0.30 |      | 10.84 |      | 输卵管因素   | 3701320002806 |
| 20.83 | 7.07  | 52 | 0.31 |      | 4.21  |      | 输卵管因素   | 3701320003292 |
| 18.75 | 7.36  | 34 | 0.21 |      | 4.5   |      | 多囊卵巢综合  | 3701320003280 |
| 24.84 | 7.99  | 35 | 0.44 |      | 7.22  |      | 高龄,输卵管因 | 3701320003323 |
| 21.3  | 7.3   | 19 | 0.33 |      | 3.15  |      | 输卵管因素   | 3701320003291 |
| 26.37 | 9.49  | 30 | 0.28 |      | 2.97  |      | 输卵管因素   | 3701320003392 |
| 22.32 | 7.34  | 5  | 0.39 |      | 5.25  |      | 多囊卵巢综合  | 3701320002600 |
| 26.67 | 5.82  | 18 | 0.17 |      | 9.02  |      | 多囊卵巢综合  | 3701320003350 |
| 19.63 | 7.18  | 43 | 0.57 | 0.49 | 8.54  | 2.12 | 多囊卵巢综合  | 3701320003359 |
| 26.57 | 7.73  | 5  | 0.55 |      | 2.52  |      | 输卵管因素   | 3701320002935 |
| 21.43 | 7.75  | 36 | 0.55 |      | 2.06  | 0.83 | 输卵管因素   | 3701320003299 |
| 33.69 | 9.75  | 45 | 0.20 |      | 2.63  | 1.67 | 多囊卵巢综合  | 3701320003414 |
| 22.72 | 6.32  | 33 | 0.64 | 0.72 | 6.49  |      | 输卵管因素   | 3701320003409 |
| 21.09 | 9.52  | 15 | 0.19 |      | 3.92  |      | 高龄,输卵管因 | 3701320002569 |
| 20.7  | 8.15  | 40 | 0.28 |      | 4.27  |      | 输卵管因素   | 3701320003318 |
| 19.53 | 7.23  | 35 | 0.29 |      | 5.17  |      | 输卵管因素   | 3701320003417 |
| 17.65 | 7.15  | 33 | 0.54 |      | 7.27  |      | 多囊卵巢综合  | 3701320003401 |
| 17.58 | 10.30 | 55 | 0.17 | 9.87 | 6.11  | 0.33 | 输卵管因素   | 3701320003371 |
| 19.1  | 7.01  | 39 | 0.76 |      | 4.3   |      | 输卵管因素   | 3701320003330 |
| 17.57 | 9.23  | 77 | 1.15 |      | 8.48  |      | 输卵管因素   | 3701320002244 |
| 27.01 | 7.24  | 35 | 0.09 |      | 2.43  |      | 输卵管因素   | 3701320003406 |
| 18.59 | 7.99  | 33 | 0.40 |      | 3.54  | 0.25 | 输卵管因素   | 3701320003411 |
| 30.12 | 8.81  | 23 | 0.10 |      | 3.87  |      | 多囊卵巢综合  | 3701320003373 |
| 21.26 | 7.23  | 70 | 0.29 |      | 6.65  |      | 输卵管因素   | 3701320001099 |
| 21.72 | 7.54  | 55 | 0.93 |      | 5.06  | 1.04 | 输卵管因素   | 3701320002922 |

|       |      |    |      |        |      |      |          |               |
|-------|------|----|------|--------|------|------|----------|---------------|
| 23.34 | 5.91 | 10 | 0.29 |        | 5.75 |      | 输卵管因素    | 3701320003370 |
| 22.43 | 7.78 | 49 | 0.13 |        | 6.04 |      | 输卵管因素    | 3701320004012 |
| 20.31 | 8.95 | 26 | 0.61 |        | 7.38 |      | 多囊卵巢综合   | 3701320003546 |
| 22.04 | 7.42 | 47 | 0.01 |        | 7.52 |      | 慢性宫颈炎    | 3701320003387 |
| 24.16 | 7.36 | 35 | 0.34 |        | 2.82 |      | 输卵管因素    | 3701320002812 |
| 24.61 | 7.49 | 28 | 0.25 |        | 6.29 |      | 输卵管因素    | 3701320003464 |
| 37.72 | 6.54 | 49 | 0.78 |        | 4.77 |      | 输卵管因素    | 3701320003442 |
| 25.39 | 8.36 | 59 | 0.17 |        | 4.39 |      | 输卵管因素    | 3701320003363 |
| 23.44 | 7.11 | 19 | 0.29 |        | 4.97 |      | 输卵管因素    | 3701320003412 |
| 22.48 | 7.88 | 26 | 0.18 |        | 3.56 | 0.49 | 多囊卵巢综合   | 3701320003400 |
| 22.06 | 8.29 | 47 | 0.30 |        | 4.94 |      | 输卵管因素    | 3701320003407 |
| 19.92 | 8.20 | 54 | 0.16 |        | 4.21 |      | 多囊卵巢综合   | 3701320003428 |
| 24.03 | 7.86 | 67 | 0.76 |        | 9.58 |      | 多囊卵巢综合   | 3701320003426 |
| 22.89 | 8.98 | 16 | 0.30 |        | 2.82 |      | 输卵管因素    | 3701320003408 |
| 21.36 | 7.55 | 40 | 0.62 |        | 9.54 | 0.23 | 多囊卵巢综合   | 3701320002976 |
| 24.51 | 8.61 | 36 | 0.02 |        | 11.8 |      | 多囊卵巢综合   | 3701320003397 |
| 25.71 | 7.20 | 37 | 0.15 |        | 4.99 |      | 输卵管因素    | 3701320003399 |
| 27.68 | 7.74 | 22 | 0.65 |        | 4.39 | 0.55 | 输卵管因素    | 3701320003377 |
| 20.82 | 9.08 | 43 | 0.08 |        | 5.28 | 0.83 | 输卵管因素    | 3701320003355 |
| 23.44 | 8.49 | 56 | 0.19 |        | 3.2  | 0.18 | 输卵管因素    | 3701320003424 |
| 22.31 | 9.25 | 35 | 0.39 |        | 8.86 |      | 输卵管因素    | 3701320003469 |
| 23.23 | 8.24 | 64 | 0.38 |        | 2.99 |      | 输卵管因素    | 3701320003482 |
| 21.48 | 7.17 | 32 | 0.18 |        | 4.84 |      | 输卵管因素    | 3701320003458 |
| 22.03 | 7.71 | 42 | 0.72 |        | 8.22 | 0.26 | 输卵管因素    | 3701320003423 |
| 20.2  | 7.88 | 41 | 0.58 |        | 5.3  |      | 输卵管因素    | 3701230002932 |
| 26.08 | 8.54 | 46 | 0.16 |        | 8.86 |      | 多囊卵巢综合   | 3701320003468 |
| 19.77 | 7.61 | 36 | 0.34 |        | 3.4  |      | 输卵管因素    | 3701320003436 |
| 17.72 | 9.71 | 38 | 0.05 |        | 4.92 |      | 输卵管因素    | 3701320003517 |
| 23.88 | 8.12 | 28 | 0.10 |        | 3.39 | 0.15 | 输卵管因素    | 3701320002196 |
| 24.61 | 5.93 | 35 | 0.24 |        | 3.82 |      | 输卵管因素    | 3701320003477 |
| 26.57 | 7.81 | 40 | 0.25 |        | 3.07 |      | 输卵管因素    | 3701320003503 |
| 20.31 | 7.87 | 59 | 0.57 |        | 6.31 |      | 输卵管因素    | 3701320003050 |
| 27.34 | 6.26 | 34 | 0.71 |        | 4.11 |      | 慢性盆腔炎, 转 | 3701320003539 |
| 25.39 | 9.41 | 62 | 0.66 |        | 9.13 |      | 输卵管因素    | 3701320002870 |
| 17.51 | 7.16 | 35 | 0.26 |        | 4.98 |      | 输卵管因素    | 3701320003476 |
| 20.82 | 7.84 | 56 | 0.18 |        | 3.22 |      | 输卵管因素    | 3701320003461 |
| 19.1  | 7.72 | 53 | 0.45 |        | 8.67 | 0.37 | 输卵管因素    | 3701320003481 |
| 32.47 | 7.44 | 55 | 0.57 |        | 3.4  |      | 输卵管因素    | 3701320003549 |
| 26.45 | 8.42 | 24 | 0.69 |        | 3.47 | 1.63 | 多囊卵巢综合   | 3701320003516 |
| 21.3  | 7.53 | 21 | 0.21 |        | 3.25 |      | 输卵管因素    | 3701320000003 |
| 24.03 | 8.76 | 31 | 0.71 |        | 3.78 |      | 输卵管因素    | 3701320001893 |
| 21.91 | 7.92 | 35 | 0.50 |        | 4.98 |      | 输卵管因素    | 3701320003544 |
| 17.19 | 7.60 | 54 | 0.16 | 174.48 | 2.55 | 0.28 | 慢性盆腔炎, 转 | 3701320002480 |
| 25.39 | 8.96 | 43 | 0.16 |        | 3.88 |      | 输卵管因素    | 3701320003593 |
| 21.67 | 7.56 | 27 | 0.48 |        | 3.21 | 1.01 | 输卵管因素    | 3701320003527 |
| 20.81 | 9.10 | 74 | 0.20 |        | 3.72 | 0.42 | 输卵管因素    | 3701320003526 |
| 19.94 | 9.28 | 43 | 0.06 |        | 6.97 |      | 输卵管因素    | 3701320003592 |
| 24.24 | 5.91 | 41 | 0.26 |        | 3.9  |      | 慢性盆腔炎, 转 | 370132000216  |
| 21.48 | 7.48 | 21 | 0.03 |        | 3.2  | 0.25 | 输卵管因素    | 3701320003066 |
| 24.03 | 7.36 | 37 | 0.70 |        | 4.14 | 1.25 | 输卵管因素    | 3701320003543 |

|       |      |    |      |         |       |       |           |               |
|-------|------|----|------|---------|-------|-------|-----------|---------------|
| 20.82 | 7.56 | 78 | 0.19 |         | 4.42  |       | 子宫内膜异位    | 3701320003220 |
| 20.96 | 8.74 |    |      |         |       |       | 输卵管因素     | 3701320003586 |
| 22.58 | 8.82 | 52 | 0.48 |         | 9.98  |       | 输卵管因素     | 3701320003613 |
| 25.39 | 7.77 | 50 | 0.70 |         | 2.09  |       | 输卵管因素     | 3701320003541 |
| 25.39 | 8.31 | 42 | 0.66 |         | 4.22  |       | 输卵管因素     | 3701320003569 |
| 20.03 | 8.29 | 44 | 0.06 |         | 10.55 |       | 输卵管因素     | 3701320002532 |
| 31.24 | 7.55 | 35 | 0.20 |         | 4.35  |       | 输卵管因素     | 3701320003570 |
| 23.74 | 7.46 | 18 | 0.64 |         | 4.84  | 1.49  | 输卵管因素     | 3701320003525 |
| 22.04 | 8.09 | 35 | 0.14 |         | 8.78  |       | 多囊卵巢综合    | 3701320003578 |
| 25.3  | 9.47 | 50 | 0.17 |         | 2.87  | 1.32  | 输卵管因素     | 3701320003528 |
| 20.81 | 6.12 | 34 | 0.22 | 11.51   | 6.02  | 17.99 | 输卵管因素     | 3701320003601 |
| 20.55 | 4.72 | 44 | 0.64 |         | 11.27 | 1.15  |           | 3701320003577 |
| 23.38 | 6.47 | 50 | 0.62 |         | 6.54  | 0.76  | 高龄, 输卵管因素 | 3701320003555 |
| 22.66 | 6.66 | 44 | 0.65 |         | 5.51  |       | 输卵管因素     | 3701320003540 |
| 21.97 | 6.11 | 51 | 0.27 | 13.25   | 3.79  | 0.49  | 输卵管因素     | 3701320003529 |
| 25.78 | 4.64 | 74 | 0.62 |         | 3.78  | 1.21  | 高龄, 输卵管因素 | 3701320003531 |
| 20.7  | 6.21 | 52 | 0.67 | 0.35    | 7.26  | 0.69  | 输卵管因素     | 3701320003556 |
| 23.44 | 6.49 | 37 | 0.25 | 24.08   | 4.03  |       | 输卵管因素     | 3701320003545 |
| 19.95 | 8.62 | 18 | 0.17 |         | 3.82  |       | 输卵管因素     | 3701320003596 |
| 22.21 | 6.25 | 51 | 0.41 |         | 3.42  |       | 输卵管因素     | 3701320003572 |
| 28.48 | 7.75 | 42 | 0.13 |         | 4.42  |       | 输卵管因素     | 3701320003536 |
| 25.59 | 6.10 | 36 | 0.37 |         | 5.5   |       | 输卵管因素     | 3701320003607 |
| 24.8  | 7.38 | 33 | 0.79 | 15.74   | 3.25  | 0.3   | 多囊卵巢综合    | 3701320003567 |
| 18.82 | 6.25 | 47 | 0.53 |         | 5.91  |       |           | 3701320003579 |
| 20.08 | 6.06 | 51 | 0.35 | 18.59   | 5.11  |       | 子宫内膜异位    | 3701320003599 |
| 19.53 | 4.43 | 40 | 0.08 |         | 8.12  |       | 多囊卵巢综合    | 3701320003580 |
| 23.44 | 6.58 | 72 | 0.54 |         | 6.34  |       | 输卵管因素     | 3701320003617 |
| 21.09 | 5.07 | 38 | 0.49 |         | 3.82  |       | 输卵管因素     | 37013400037   |
| 19.49 | 7.55 | 45 | 0.37 | 348.1   | 5.18  | 1.35  | 输卵管因素     | 3701320003602 |
| 25.39 | 8.00 | 78 | 0.38 | 8.46    | 2.07  | 0.26  | 输卵管因素     | 3701320003614 |
| 22.19 | 5.88 | 48 | 0.32 |         | 5.21  |       | 输卵管因素     | 3701320003709 |
| 20.55 | 9.45 |    |      |         |       |       | 高龄, 输卵管因素 | 3701320003611 |
| 32.24 | 5.53 | 28 | 0.16 |         | 3.02  | 0.2   | 输卵管因素     | 370132000399  |
| 18.75 | 6.59 | 71 | 0.18 | 680.31  | 4.32  | 0.83  | 输卵管因素     | 3701320003688 |
| 22.89 | 7.72 | 35 | 0.28 |         | 4.48  |       | 输卵管因素     | 3701320003663 |
| 23.44 | 7.75 | 38 | 0.10 |         | 3.14  |       | 输卵管因素     | 3701320002195 |
| 17.36 | 7.76 | 44 | 0.40 | 399.83  | 5.95  | 0.3   | 输卵管因素     | 3701320003763 |
| 31.64 | 6.98 | 65 | 0.55 | 4871.76 | 3.16  | 1.21  | 输卵管因素     | 3701320003629 |
| 21.23 | 6.69 | 29 | 0.23 | 477     | 4.2   | 1.21  | 高龄, 输卵管因素 | 3701320003713 |
| 22.6  | 9.38 | 31 | 0.50 |         | 8.49  |       | 慢性宫颈炎     | 3701320003646 |
| 29.03 | 5.96 | 37 | 0.20 | 6161.78 | 7.52  | 0.33  | 多囊卵巢综合    | 3701320002214 |
| 20.31 | 6.18 | 41 | 0.58 |         | 7.91  |       | 输卵管因素     | 3701320003741 |
| 21.48 | 7.93 | 70 | 0.08 |         | 3.93  |       | 输卵管因素     | 3701320003739 |
| 18.75 | 6.04 | 31 | 0.36 |         | 6.47  |       | 输卵管因素     | 3701320003711 |
| 18.75 | 6.74 | 20 | 0.28 |         | 5.32  |       | 多囊卵巢综合    | 3701320003748 |
| 19.36 | 6.13 | 48 | 0.38 | 161.97  | 4.82  | 1.32  | 输卵管因素     | 3701320003774 |
| 19.92 | 5.42 | 54 | 0.46 |         | 5.24  |       | 多囊卵巢综合    | 3701320003428 |
| 20.7  | 7.05 | 46 | 0.41 |         | 5.21  |       | 输卵管因素     | 3701320003742 |
| 31.25 | 7.62 | 36 | 0.07 |         | 9.86  |       |           | 3701320003762 |
| 30.11 | 6.08 | 45 | 0.26 |         | 3.81  |       | 多囊卵巢综合    | 3701320003720 |

|       |      |    |      |        |       |       |        |               |
|-------|------|----|------|--------|-------|-------|--------|---------------|
| 27.48 | 5.75 | 53 | 0.52 |        | 3.92  |       | 多囊卵巢综合 | 3701320002301 |
| 22.32 | 6.61 | 44 | 0.05 |        | 8.96  |       | 多囊卵巢综合 | 3701320003883 |
| 21.6  | 6.21 | 42 | 0.21 |        |       |       | 输卵管因素  | 3701320002521 |
| 18.55 | 7.68 | 14 | 0.17 |        | 6.21  |       | 输卵管因素  | 3701320003429 |
| 23.31 | 6.78 | 36 | 0.23 |        | 4.48  |       | 输卵管因素  | 3701320003814 |
| 27.34 | 7.97 | 36 | 0.56 |        | 2.06  |       | 输卵管因素  | 3701320003293 |
| 22.83 | 6.60 | 47 | 0.25 | 557.77 | 7.57  |       | 输卵管因素  | 3701320003797 |
| 27.41 | 6.48 | 23 | 0.16 |        | 5.45  |       | 输卵管因素  | 3701320003964 |
| 33.3  | 5.26 | 46 | 0.56 | 14.3   | 4.56  | 0.23  | 输卵管因素  | 3701320003753 |
| 24.44 | 7.32 | 60 | 0.75 |        | 2.45  |       | 输卵管因素  | 3701320003853 |
| 25.39 | 5.53 | 25 | 0.40 | 296.16 | 3.89  | 0.8   | 输卵管因素  | 3701320003761 |
| 29.78 | 6.75 | 50 | 0.71 |        | 3.49  |       | 输卵管因素  | 3701320003784 |
| 23.44 | 7.78 | 36 | 0.49 | 9.28   | 3.1   | 0.5   | 输卵管因素  | 370132000751  |
| 20.32 | 6.24 | 20 | 0.70 | 334.96 | 3.64  | 0.25  | 输卵管因素  | 3701320003833 |
| 24.14 | 4.91 | 26 | 0.63 |        | 5.02  |       | 输卵管因素  | 3701320003806 |
| 23.34 | 6.62 | 35 | 0.32 |        | 4.89  |       | 输卵管因素  | 370132000145  |
| 29.3  | 6.25 | 44 | 0.14 | 145.22 | 2.25  | 1.84  | 输卵管因素  | 3701320003785 |
| 31.25 | 7.78 | 35 | 0.69 |        | 4.48  |       | 输卵管因素  | 3701320003866 |
| 26.67 | 4.71 | 37 | 0.19 |        | 3.2   | 0.37  | 输卵管因素  | 3701320001615 |
|       | 7.74 | 28 | 0.09 | 361.46 | 3.94  | 2.12  | 输卵管因素  | 3701320003877 |
| 19.53 | 8.77 | 43 | 0.34 |        | 4.42  | 0.97  | 多囊卵巢综合 | 3701320003185 |
| 19.29 | 5.05 | 62 | 0.17 |        | 4.53  |       | 子宫内异位  | 3701320003398 |
| 22.59 | 9.32 | 31 | 0.75 |        | 5.1   | 0.27  | 输卵管因素  | 3701320003440 |
| 21.09 | 6.70 | 62 | 0.19 |        | 4.05  |       | 输卵管因素  | 3701320003905 |
| 25.48 | 6.72 | 35 | 0.25 |        | 7.78  |       | 多囊卵巢综合 | 3701320003973 |
| 27.34 | 7.37 | 30 | 0.36 |        | 4.64  | 0.18  | 输卵管因素  | 3701320003302 |
| 23.44 | 8.98 | 39 | 0.30 |        | 2.79  | 0.87  | 多囊卵巢综合 | 3701320003207 |
|       | 6.13 | 51 | 0.65 |        | 5.75  |       | 输卵管因素  | 3701320001350 |
| 20.45 | 4.48 | 40 | 0.60 |        | 8.26  |       | 多囊卵巢综合 | 3701320003928 |
| 22.31 | 7.64 | 25 | 0.23 | 312.49 | 5.42  | 2.01  | 输卵管因素  | 3701320003942 |
| 28.34 | 6.04 | 36 | 0.30 |        | 12.27 | 0.39  | 输卵管因素  | 3701320004036 |
| 20.81 | 7.78 | 34 | 0.11 |        | 6.02  | 17.99 | 输卵管因素  | 3701320003601 |
| 25.28 | 7.47 | 43 | 0.38 | 7.36   | 8.03  | 0.63  | 多囊卵巢综合 | 3701320004055 |
| 21.09 | 5.81 | 35 | 0.55 |        | 4.11  |       | 多囊卵巢综合 | 3701320004028 |
| 20.2  | 4.59 | 60 | 0.66 | 310.58 | 2.96  | 0.4   | 输卵管因素  | 3701320003967 |
| 18.37 | 6.67 | 35 | 0.09 | 626    | 3.88  | 0.61  | 输卵管因素  | 3701320004661 |
| 22.06 | 7.78 | 77 | 0.24 |        | 6.36  |       | 输卵管因素  | 3701320003976 |
| 18.75 | 8.05 | 34 | 0.33 |        | 4.5   |       | 多囊卵巢综合 | 3701320003280 |
| 20.94 | 2.79 | 75 | 0.76 |        | 5.02  |       | 输卵管因素  | 3701320003948 |
| 30.12 | 4.68 | 40 | 0.37 |        | 7.78  |       | 多囊卵巢综合 | 3701320003937 |
| 22.49 | 5.62 | 46 | 0.38 | 257.79 | 5.08  | 0.56  | 多囊卵巢综合 | 3701320003944 |
| 20.2  | 5.04 | 41 | 0.04 | 322.24 | 2.14  | 69.4  | 输卵管因素  | 3701320004009 |
| 21.48 | 6.80 | 51 | 0.16 |        | 2.01  | 1.58  |        | 3701320003958 |
| 25.53 | 4.67 | 55 | 0.30 | 187.2  | 2.52  | 0.97  | 输卵管因素  | 3701320003984 |
| 22.04 | 6.62 | 35 | 0.55 |        | 9.86  |       | 多囊卵巢综合 | 3701320003960 |
| 25.78 | 5.30 | 23 | 0.27 | 32     | 4.2   | 0.25  | 输卵管因素  | 3701320004043 |
| 17.85 | 3.20 | 12 | 0.19 | 32     | 6.5   | 0.21  | 输卵管因素  | 3701320004045 |
| 27.34 | 6.30 | 23 | 0.68 | 21     | 3.6   | 0.25  | 输卵管因素  | 3701320004118 |
| 20.31 | 6.39 | 45 | 0.21 | 326.48 | 5.72  |       | 输卵管因素  | 3701320004090 |
| 21.26 | 7.25 | 29 | 0.30 | 499.26 | 8.29  | 1.35  | 输卵管因素  | 3701320004110 |

|       |      |    |      |        |       |       |           |               |
|-------|------|----|------|--------|-------|-------|-----------|---------------|
|       | 3.93 | 43 | 0.23 |        | 6.18  |       | 输卵管因素     | 3701320004084 |
| 22.66 | 4.80 | 56 | 0.31 |        | 6.56  |       | 输卵管因素     | 3701320004094 |
| 20.57 | 7.60 | 56 | 0.33 | 152.43 | 9.67  | 1.25  | 多囊卵巢综合    | 3701320004023 |
| 20.83 | 6.05 | 38 | 0.32 | 106    | 4.19  | 0.9   | 输卵管因素     | 3701320001721 |
| 18.83 | 6.46 | 70 | 0.73 | 796.27 | 5.78  | 1.7   | 输卵管因素     | 3701320004041 |
| 24.8  | 4.69 | 55 | 0.55 | 108.97 | 4.92  | 1.84  | 输卵管因素     | 3701320004144 |
| 25.24 | 5.76 | 50 | 0.34 |        | 2.51  |       | 输卵管因素     | 3701320004080 |
| 23.44 | 7.17 |    |      |        |       |       | 输卵管因素     | 3701320004044 |
| 23.44 | 6.57 |    |      |        |       |       | 输卵管因素     | 3701320004143 |
| 18.42 | 7.02 | 20 | 0.28 | 259.49 | 2.44  | 0.8   | 输卵管因素     | 3701320004059 |
| 20.66 | 6.91 | 25 | 0.20 |        | 4.65  |       | 输卵管因素     | 3701320004064 |
| 29    | 4.03 | 31 | 0.45 | 184.23 | 4.43  | 0.6   | 多囊卵巢综合    | 3701320004113 |
| 27.05 | 5.1  | 31 | 0.11 | 145.22 | 3.98  | 1.42  | 输卵管因素     | 3701320004111 |
| 22.03 | 5.13 | 31 | 0.46 |        | 5.06  |       | 输卵管因素     | 3701320004078 |
| 23.44 | 5.90 | 15 | 0.35 |        | 2.32  |       | 输卵管因素     | 3701320003634 |
| 21.34 | 3.43 | 18 | 0.49 |        | 3.72  |       | 输卵管因素     | 3701320004177 |
| 18.44 | 5.57 | 54 | 0.36 | 21.13  | 5.33  | 0.38  | 输卵管因素     | 3701320004138 |
| 21.71 | 9.53 | 0  | 0.28 |        |       |       | 高龄, 输卵管因素 | 3701320004131 |
| 21.94 | 6.89 | 48 | 0.40 |        | 5.69  |       | 输卵管因素     | 3701320001481 |
| 22.58 | 5.76 | 21 | 0.95 | 360.82 | 8.3   | 82.52 | 输卵管因素     | 3701320004139 |
| 24.68 | 7.54 | 20 | 0.78 | 12     | 3.97  | 0.24  | 输卵管因素     | 3701320004157 |
| 19.73 | 6.45 | 27 | 0.23 | 207.97 | 5.65  | 1.11  | 输卵管因素     | 3701320004146 |
| 27.51 | 6.57 | 21 | 1.10 | 438.84 | 3.63  | 1.21  | 输卵管因素     | 3701320004129 |
| 30.06 | 6.31 | 51 | 0.19 | 189.32 | 11.53 | 2.08  | 输卵管因素     | 3701320004196 |
| 29.03 | 5.55 | 46 | 1.21 |        | 2.89  |       | 高龄, 输卵管因素 | 3701320004187 |
| 29.24 | 4.68 | 31 | 0.57 |        | 4.48  |       | 输卵管因素     | 3701320004170 |
| 26.35 | 4.16 | 23 | 0.79 |        | 4.16  |       | 多囊卵巢综合    | 3701320004145 |
| 19.22 | 3.13 | 36 | 1.19 |        | 2.64  |       | 输卵管因素     | 3701320004193 |
| 22.04 | 5.33 | 27 | 1.03 |        | 3.77  |       | 输卵管因素     | 3701320004127 |
| 20.96 | 5.72 | 54 | 0.25 |        | 5.03  |       | 输卵管因素     | 3701320004158 |
| 25.71 | 6.63 | 62 | 0.38 | 178.5  | 4.15  | 1.04  | 输卵管因素     | 3701320004185 |
| 18.07 | 3.29 | 35 | 0.19 |        | 2.89  |       | 输卵管因素     | 3701320004240 |
| 28.69 | 5.77 | 41 | 0.54 |        | 3.61  |       | 输卵管因素     | 3701320004156 |
| 19.58 | 7.59 | 67 | 0.75 |        | 6.8   |       | 输卵管因素     | 3701320004191 |
| 22.66 | 6.41 | 51 | 0.49 |        | 5.99  |       | 输卵管因素     | 3701320004208 |
| 28.96 | 5.10 | 67 | 0.56 | 238.08 |       | 2.95  | 高龄, 输卵管因素 | 3701320004254 |
| 24.44 | 7.15 | 54 | 0.68 | 321.6  | 2.74  | 0.76  | 输卵管因素     | 3701320004228 |
| 20.83 | 6.92 | 43 | 0.49 |        | 4.41  |       | 输卵管因素     | 3701320004259 |
| 24.61 | 5.38 | 28 | 0.45 |        | 4.88  |       | 输卵管因素     | 3701320004260 |
| 24.03 | 4.38 | 76 | 0.21 | 204.79 | 3.57  | 1.67  | 输卵管因素     | 3701320004502 |
| 25.39 | 5.97 | 52 | 0.42 | 205.43 | 4.87  |       | 输卵管因素     | 3701320003887 |
| 22.68 | 5.13 | 68 | 0.44 | 211.36 | 12.18 | 1.84  | 输卵管因素     | 3701320004215 |
| 23.8  | 7.83 | 41 | 0.32 | 9.38   | 6.21  | 0.31  | 不明原因不孕    | 3701320004207 |
| 18.83 | 4.09 | 37 | 0.10 |        | 10.56 |       | 输卵管因素     | 3701320004253 |
| 23.88 | 5.66 | 33 | 0.72 |        | 6.04  |       | 多囊卵巢综合    | 3701320004280 |
| 21.26 | 5.16 | 59 | 0.20 | 3.67   | 5.84  | 0.4   | 输卵管因素     | 3701320004220 |
| 26.04 | 6.35 | 30 | 0.05 | 7.97   | 4.71  | 0.55  | 输卵管因素     | 3701320004214 |
| 19.1  | 7.10 | 65 | 0.49 | 135.04 | 6.52  | 2.15  | 多囊卵巢综合    | 3701320004277 |
| 28.72 | 5.29 | 57 | 0.23 | 131.44 | 4.14  | 1.11  | 输卵管因素     | 3701320004239 |
| 28.23 | 1.95 | 46 | 0.41 | 9.25   | 9.28  | 1.1   | 输卵管因素     | 3701320004278 |

|       |      |    |      |        |       |        |           |               |
|-------|------|----|------|--------|-------|--------|-----------|---------------|
| 23.19 | 6.14 | 56 | 0.76 | 564.34 | 10.18 | 225.55 | 输卵管因素     | 3701320004267 |
| 22.77 | 4.97 | 28 | 0.52 | 9.86   | 4     | 1.97   | 输卵管因素     | 3701320004233 |
| 25.39 | 3.15 | 12 | 0.43 |        | 4.22  |        | 输卵管因素     | 3701320004229 |
| 23.18 | 6.82 | 33 | 0.42 |        | 5.86  |        | 输卵管因素     | 3701320004243 |
| 26.57 | 4.57 | 0  | 0.74 | 11.16  | 8.58  | 0.66   | 输卵管因素     | 3701320004274 |
| 30.8  | 4.6  | 18 | 0.36 | 117.02 | 3.06  | 0.73   | 输卵管因素     | 3701320004292 |
| 22.58 | 6.85 | 25 | 0.78 |        | 4.06  |        | 输卵管因素     | 3701320004247 |
| 26.35 | 6.18 | 31 | 0.75 | 220.48 | 5.65  | 1.74   | 多囊卵巢综合    | 3701320004250 |
| 28.58 | 7.45 | 35 | 0.59 |        | 5.21  |        | 输卵管因素     | 3701320004296 |
| 26.84 | 5.33 | 57 | 0.14 | 152.85 | 10.21 | 1.77   | 输卵管因素     | 3701320004370 |
| 25.81 | 3.98 | 29 | 0.15 | 142.04 | 4.32  | 1.77   | 输卵管因素     | 3701320004388 |
| 20.7  | 4.63 | 57 | 0.74 |        | 4.28  | 0.1    | 输卵管因素     | 3701320003097 |
| 24.44 | 4.72 | 42 | 0.61 | 60     | 5.33  | 2.15   | 多囊卵巢综合    | 3701320004492 |
| 21.64 | 6.21 | 52 | 0.95 | 229.38 | 4.89  | 0.31   | 输卵管因素     | 3701320003779 |
| 19.23 | 5.23 | 48 | 0.75 | 162.39 | 4.98  | 1.32   | 输卵管因素     | 3701320004401 |
| 27.55 | 3.56 | 32 | 0.33 | 237.44 | 2.96  | 1.28   | 多囊卵巢综合    | 3701320004341 |
| 23.23 | 3.93 | 53 | 0.16 |        | 6.18  |        | 输卵管因素     | 3701320004084 |
| 20.2  | 6.41 | 28 | 0.61 |        | 5.37  | 0.56   | 输卵管因素     | 3701320003515 |
| 22.77 | 7.30 | 42 | 0.23 | 319.91 | 5.77  | 2.78   | 多囊卵巢综合    | 3701320004410 |
| 23.31 | 6.63 | 34 | 0.21 | 267.97 | 3.63  | 1.98   | 输卵管因素     | 3701320004379 |
| 24.03 | 7.18 | 54 | 0.33 | 287.47 | 2.96  | 6.84   | 高龄, 输卵管因素 | 3701320004461 |
| 24.46 | 5.14 | 29 | 0.17 |        | 5.61  |        | 多囊卵巢综合    | 3701320004371 |
| 20.2  | 5.36 | 27 | 0.77 | 357.01 | 4.87  | 1.8    | 输卵管因素     | 3701320004429 |
| 23.23 | 5.31 | 33 | 0.33 | 207.97 | 5.09  | 5.03   | 输卵管因素     | 3701320004367 |
| 22.89 | 7.05 | 33 | 0.77 | 211.79 | 2.07  | 0.94   | 输卵管因素     | 3701320004050 |
| 20.7  | 7.65 | 52 | 0.38 | 270.72 | 13.49 | 2.5    | 多囊卵巢综合    | 3701320004403 |
| 21.48 | 4.86 | 21 | 0.39 |        | 6.95  |        |           | 3701320003788 |
| 20.7  | 4.56 | 71 | 0.59 | 450.71 | 3.07  | 0.59   | 输卵管因素     | 3701320004413 |
| 19.03 | 5.73 | 42 | 0.48 | 13.04  | 6     | 0.75   |           | 3701320004375 |
| 15.24 | 5.73 | 23 | 0.65 |        | 5.92  |        | 输卵管因素     | 37013400054   |
| 18.82 | 5.85 | 24 | 0.28 | 218.57 | 4.8   | 1.18   | 多囊卵巢综合    | 3701320004408 |
| 35.55 | 4.81 | 51 | 0.65 |        | 3.08  | 2.78   | 多囊卵巢综合    | 3701320004539 |
| 18.9  | 5.11 | 47 | 0.25 |        | 8.38  |        | 输卵管因素     | 3701320004445 |
| 18.69 | 6.28 | 51 | 0.43 | 452.41 | 3.83  | 1.04   | 子宫内位      | 3701320004435 |
| 25.39 | 7.03 | 31 | 0.76 |        | 6.68  |        | 输卵管因素     | 3701320004418 |
| 22.04 | 8.11 | 58 | 0.70 | 9.8    | 4.27  |        | 输卵管因素, 性  | 3701320004397 |
| 26.35 | 6.62 | 82 | 0.37 |        | 7.2   |        | 输卵管因素     | 370132000515  |
| 18.03 | 4.96 | 54 | 0.54 |        | 4.64  |        | 子宫内位      | 3701320004648 |
| 21.48 | 6.94 | 21 | 0.66 |        | 5.39  |        | 多囊卵巢综合    | 3701320004504 |
| 18.75 | 8.36 | 63 | 0.47 | 431.63 | 6.44  |        | 输卵管因素     | 3701320004385 |
| 26.04 | 5.87 | 54 | 0.52 |        | 2.32  |        | 输卵管因素     | 3701320004452 |
| 24.77 | 4.99 | 53 | 0.28 | 195.04 | 5.31  | 2.29   | 多囊卵巢综合    | 3701320004409 |
| 19.05 | 6.61 | 51 | 0.66 | 219.63 | 2.75  |        | 多囊卵巢综合    | 3701320003941 |
| 20.2  | 3.39 | 50 | 0.26 |        | 2.67  |        |           | 3701320004518 |
| 25.1  | 3.57 | 29 | 0.23 |        | 6.44  |        | 多囊卵巢综合    | 3701320004407 |
| 16.94 | 5.30 | 9  | 0.53 |        | 5.43  | 0.3    | 输卵管因素     | 3701320003480 |
| 20.45 | 5.86 | 16 | 0.48 | 221.33 | 9.33  | 1.56   | 输卵管因素     | 3701320003923 |
| 24.84 | 7.04 | 28 | 0.69 |        | 7.05  | 0.83   | 多囊卵巢综合    | 3701320004412 |
| 20.89 | 4.90 | 36 | 0.67 |        | 4.32  |        | 输卵管因素     | 3701320004498 |
| 17.85 | 5.87 | 48 | 0.20 |        | 5.08  |        | 输卵管因素     | 3701320004464 |

|       |       |    |      |         |       |       |           |               |
|-------|-------|----|------|---------|-------|-------|-----------|---------------|
| 22.03 | 7.91  | 34 | 0.65 | 1139.92 | 5.77  | 1.04  | 输卵管因素     | 3701320004462 |
| 24.09 | 9.08  | 13 | 0.49 |         | 2.6   | 0.25  | 输卵管因素     | 3701320002644 |
| 19.59 | 5.72  | 38 | 0.38 | 432.9   | 6.55  | 0.54  |           | 3701320004565 |
| 24.54 | 7.28  | 10 | 0.39 |         | 6.74  |       | 多囊卵巢综合    | 3701320004472 |
| 26.57 | 5.73  | 53 | 0.44 | 231.08  | 5.79  | 2.88  | 多囊卵巢综合    | 3701320004560 |
| 24.84 | 2.76  | 21 | 0.52 | 470     | 4.99  |       | 输卵管因素     | 3701320004499 |
| 27.68 | 10.73 | 37 | 0.20 |         | 3.29  |       | 输卵管因素     | 3701320003847 |
| 20.17 | 7.51  | 35 | 0.05 | 194.4   | 3.91  | 0.58  | 输卵管因素     | 3701320004481 |
| 24.17 | 7.96  | 63 | 1.07 |         | 3.28  |       | 子宫内膜异位    | 3701320004516 |
| 32.03 | 6.26  | 33 | 0.47 | 181.68  | 7.91  | 3.3   | 多囊卵巢综合    | 3701320004458 |
| 27.94 | 4.58  | 83 | 0.52 | 486.8   | 6.67  |       | 输卵管因素     | 3701320004515 |
| 23.44 | 6.13  | 46 | 0.39 | 182.53  | 2.38  | 1.42  | 输卵管因素     | 3701320004493 |
| 30.04 | 6.24  | 67 | 1.18 |         | 3.82  |       | 多囊卵巢综合    | 3701320004563 |
| 18.42 | 7.02  | 20 | 0.32 | 259.49  | 2.44  | 0.8   | 输卵管因素     | 3701320004059 |
| 23.44 | 6.89  | 37 | 0.62 |         | 4.78  |       | 高龄, 输卵管因素 | 3701320004524 |
| 24.84 | 7.57  | 17 | 1.25 |         | 2.82  |       | 输卵管因素     | 3701320004065 |
| 24.17 | 6.30  | 12 | 1.07 | 32      | 3.6   | 0.21  | 输卵管因素     | 3701320004517 |
| 22.27 | 4.19  | 28 | 0.28 | 316.3   | 5.55  | 0.69  | 多囊卵巢综合    | 3701320004538 |
| 24.78 | 4.22  | 27 | 0.71 |         | 5.43  |       | 多囊卵巢综合    | 3701320004521 |
| 23.88 | 7.89  | 52 | 0.29 |         | 10.11 |       | 多囊卵巢综合    | 3701320004713 |
| 24.31 | 5.37  | 55 | 0.16 |         | 6.25  |       | 输卵管因素     | 3701320004569 |
| 23.63 | 8.64  | 42 | 0.17 |         | 5.14  | 0.42  | 输卵管因素     | 3701320002499 |
| 23.44 | 5.13  | 27 | 2.42 |         | 3.06  |       | 多囊卵巢综合    | 3701320002357 |
| 23.23 | 5.69  | 69 | 0.17 |         | 5.57  |       | 输卵管因素     | 3701320004520 |
| 22.77 | 4.97  | 28 | 0.60 | 9.86    | 4     | 1.97  | 输卵管因素     | 3701320004233 |
| 19.53 | 7.14  | 27 | 0.39 | 275.81  | 5.44  | 1.8   | 输卵管因素     | 3701320004562 |
| 20.7  | 4.45  | 25 | 0.30 |         | 5.85  |       | 输卵管因素     | 3701320004548 |
| 21.5  | 5.14  | 46 | 0.69 | 11.91   | 7.21  | 0.23  | 输卵管因素     | 3701320004607 |
| 27.34 | 6.40  | 23 | 0.29 |         | 6.5   | 1.8   | 输卵管因素     | 3701320004561 |
| 28.91 | 4.93  | 25 | 0.20 | 128.9   | 2.32  | 1.15  | 输卵管因素     | 3701320004633 |
| 22.86 | 5.60  | 61 | 0.20 | 387.75  | 4.68  | 2.32  |           | 3701320004549 |
| 21.71 | 5.57  | 23 | 0.24 |         | 3.36  |       | 高龄, 输卵管因素 | 3701320004131 |
| 19.53 | 8.11  | 20 | 0.95 | 146.07  | 6.91  | 0.83  | 输卵管因素     | 3701320004608 |
| 26.67 | 8.99  | 55 | 0.92 |         | 7.82  |       | 输卵管因素     | 3701320004618 |
| 22.06 | 7.25  | 32 | 0.25 | 184.02  | 2.73  | 1.77  | 输卵管因素     | 3701320004583 |
| 20.57 | 9.67  | 35 | 0.20 |         | 4.72  |       | 输卵管因素     | 3701320004617 |
| 31.25 | 10.11 | 43 | 0.50 |         | 2.57  |       | 输卵管因素     | 3701320004685 |
| 22.58 | 4.92  | 47 | 0.47 | 699.39  | 2.26  | 1.25  | 输卵管因素     | 3701320004622 |
| 29.9  | 7.26  | 25 | 0.78 |         | 8.33  |       | 输卵管因素     | 3701320004731 |
| 22.58 | 7.42  | 20 | 0.30 | 281.32  | 8.32  | 0.59  | 输卵管因素     | 3701320004162 |
| 21.48 | 7.31  | 67 | 0.18 |         | 6.23  |       | 输卵管因素     | 3701320004623 |
| 28.65 | 7.29  | 35 | 0.11 | 17.96   | 5.07  | 0.65  | 输卵管因素     | 3701320004654 |
| 22.6  | 7.28  | 79 | 0.50 |         | 2.37  |       | 慢性宫颈炎     | 3701320004584 |
| 22.58 | 8.45  | 85 | 0.15 |         | 9.81  |       | 输卵管因素     | 3701320004602 |
| 27.22 | 6.65  | 19 | 0.29 | 217.45  | 4.82  | 12.11 | 输卵管因素     | 3701320004361 |
| 22.38 | 7.57  | 30 | 0.46 | 156.9   | 6.09  | 0.31  | 输卵管因素     | 3701320004650 |
| 20.94 | 8.33  | 26 | 0.23 |         | 6.66  |       | 输卵管因素     | 3701320004657 |
| 18.69 | 7.37  | 26 | 0.18 | 296.16  | 7.22  | 1.84  | 多囊卵巢综合    | 3701320004582 |
| 24.01 | 6.54  | 71 | 0.30 | 214.97  | 5.18  |       | 多囊卵巢综合    | 3701320004620 |
| 20.81 | 7.76  | 43 | 0.14 |         | 4.01  |       | 输卵管因素     | 3701320004619 |



|       |       |    |      |         |       |        |           |               |
|-------|-------|----|------|---------|-------|--------|-----------|---------------|
| 19.23 | 7.85  | 50 | 0.22 |         | 5.67  |        | 子宫内膜异位    | 3701320003756 |
| 23.53 | 6.84  | 22 | 0.44 | 10.38   | 8.27  | 0.62   | 输卵管因素     | 3701320004631 |
| 26.04 | 7.75  | 21 | 0.18 |         | 3.6   |        | 输卵管因素     | 3701320004612 |
| 28.52 | 6.15  | 54 | 0.13 |         | 7.19  |        | 输卵管因素     | 370132000491  |
| 20.76 | 5.32  | 33 | 0.27 | 17.38   | 10.95 | 0.47   |           | 3701320004669 |
| 20.7  | 5.04  | 67 | 1.03 | 133.77  | 2.39  | 87.44  | 多囊卵巢综合    | 3701320004594 |
| 25.71 | 4.30  | 52 | 0.40 | 110.45  | 4.6   | 2.78   | 多囊卵巢综合    | 3701320004621 |
| 17.22 | 5.51  | 33 | 0.85 |         | 6.52  |        | 高龄, 输卵管因素 | 3701320004447 |
| 27.05 | 7.1   | 31 | 0.16 | 145.22  | 3.98  | 1.42   | 输卵管因素     | 3701320004111 |
| 20.31 | 7.28  | 38 | 1.00 | 287.68  | 11.62 |        | 输卵管因素     | 3701320004290 |
| 24.77 | 9.9   | 11 | 0.11 | 458.13  | 2.9   | 0.24   | 高龄, 输卵管因素 | 3701320004195 |
| 24.61 | 7.26  | 19 | 0.74 |         | 2.44  |        | 输卵管因素     | 3701320004628 |
| 17.72 | 8.34  | 62 | 0.57 | 320.12  | 3.69  | 2.74   | 输卵管因素     | 3701320004547 |
| 26.57 | 5.06  | 48 | 0.52 | 5304.24 | 7.81  | 2.13   | 多囊卵巢综合    | 3701320004640 |
| 24.22 | 7.20  | 33 | 0.21 |         | 5.6   |        | 输卵管因素     | 3701320004693 |
| 21.09 | 2.90  | 48 | 0.21 |         | 2.39  |        | 输卵管因素     | 3701320004645 |
| 24.77 | 7.69  | 46 | 0.36 | 168.12  | 4.75  | 0.31   | 输卵管因素     | 3701320004688 |
| 19.05 | 9.48  | 52 | 0.32 |         | 8.56  |        | 输卵管因素     | 3701320004646 |
| 23.34 | 4.47  | 49 | 0.15 |         | 7.58  |        | 输卵管因素     | 3701320004680 |
| 23.73 | 5.22  | 37 | 0.65 |         | 6.52  |        | 输卵管因素     | 3701320004714 |
| 21.48 | 8.27  | 44 | 0.78 | 344.71  | 6.21  | 2.12   | 多囊卵巢综合    | 3701320004701 |
| 26.72 | 4.70  | 67 | 0.24 |         | 3.79  |        | 输卵管因素     | 3701320004374 |
| 19.23 | 6.39  | 77 | 0.51 | 428.24  | 5.97  | 1.8    | 输卵管因素     | 3701320004705 |
| 20.7  | 4.80  | 27 | 0.68 |         | 4.17  |        | 输卵管因素     | 3701320004745 |
| 20.28 | 7.38  | 42 | 0.73 |         | 4.51  | 2.15   | 输卵管因素     | 3701320000061 |
| 23.19 | 6.14  | 56 | 0.44 | 564.34  | 10.18 | 225.55 | 输卵管因素     | 3701320004267 |
| 29.9  | 10.88 | 13 | 0.20 |         | 3.1   |        | 输卵管因素     | 3701320004676 |
| 25.7  | 7.08  | 31 | 0.50 | 9.74    | 4.88  | 0.35   | 输卵管因素     | 3701320004655 |
| 17.91 | 6.38  | 24 | 0.29 | 418.7   | 8.91  | 74.61  | 输卵管因素     | 3701320004338 |
| 25.7  | 6.09  | 34 | 0.25 |         | 5.7   |        | 输卵管因素     | 3701320004658 |
| 25    | 7.05  | 56 | 0.56 | 313.97  | 7.69  | 3.82   | 输卵管因素     | 3701320004684 |
| 22.89 | 6.96  | 64 | 0.17 |         | 4.23  |        | 输卵管因素     | 3701320003416 |
| 21.9  | 7.07  | 49 | 0.57 |         | 8.96  |        | 多囊卵巢综合    | 3701320004954 |
| 23.7  | 5.95  | 68 | 0.18 | 220.69  | 4.22  | 0.56   | 高龄, 输卵管因素 | 3701320004722 |
| 23.44 | 7.36  | 67 | 0.77 | 642.7   | 4.34  | 0.53   | 输卵管因素     | 3701320004356 |
| 26.6  | 4.17  | 44 | 0.30 |         | 6.23  |        | 输卵管因素     | 3701320004767 |
| 18.6  | 6.53  | 35 | 0.14 | 444.35  | 5.35  | 1.04   | 输卵管因素     | 3701320004708 |
| 31.2  | 5.32  | 56 | 0.39 |         | 8.25  |        | 输卵管因素     | 3701320004926 |
| 20.7  | 7.65  | 52 | 0.80 | 270.72  | 6.39  | 2.5    | 多囊卵巢综合    | 3701320004403 |
| 25.7  | 9.71  | 32 | 0.09 |         | 6.32  |        | 多囊卵巢综合    | 3701320004765 |
|       | 5.74  | 47 | 0.70 | 281.54  | 4.48  |        | 多囊卵巢综合    | 3701320004739 |
| 18.03 | 9.99  | 21 | 0.87 | 182.11  | 8.56  | 1.25   | 输卵管因素     | 3701320004453 |
| 23.4  | 7.68  | 52 | 0.46 |         | 5.52  |        |           | 3701320005167 |
| 21.6  | 5.27  | 42 | 0.57 | 197.7   | 10.32 | 1.7    | 多囊卵巢综合    | 3701320004807 |
| 27.5  | 4.23  | 29 | 0.22 | 251.86  | 4.68  | 1.01   | 输卵管因素     | 3701320004912 |
| 24.6  | 10.3  | 55 | 0.13 |         | 5.87  |        | 高龄, 输卵管因素 | 3701320004737 |
| 23.88 | 5.66  | 33 | 0.50 |         | 6.04  |        | 多囊卵巢综合    | 3701320004280 |
| 19.5  | 5.26  | 36 | 0.74 |         | 7.52  |        | 子宫内膜异位    | 3701320004706 |
| 24.46 | 4.63  | 46 | 0.42 | 204.58  | 6.01  | 1.77   | 多囊卵巢综合    | 3701320004184 |
| 20.8  | 7.26  | 56 | 0.08 |         | 4.59  |        | 输卵管因素     | 3701320004674 |

|       |      |    |      |        |       |      |           |               |
|-------|------|----|------|--------|-------|------|-----------|---------------|
| 26.2  | 5.30 | 28 | 0.59 | 27.47  | 5.32  | 0.31 | 输卵管因素     | 3701320004675 |
| 24.6  | 5.27 | 38 | 0.02 |        | 3.28  |      | 输卵管因素     | 3701320004721 |
| 25.3  | 7.34 | 43 | 0.71 |        | 2.5   |      | 输卵管因素     | 3701320004738 |
| 26    | 7.73 | 15 | 0.03 |        | 7.62  |      | 输卵管因素     | 3701320004761 |
| 23.63 | 6.98 | 13 | 0.12 |        | 3.71  |      | 输卵管因素     | 3701320004089 |
| 20.4  | 9.49 | 41 | 0.34 |        | 7.99  |      | 输卵管因素     | 3701320004776 |
| 23    | 6.75 | 36 | 0.21 |        | 4.99  |      | 输卵管因素     | 3701320004842 |
| 25.6  | 7.34 | 27 | 0.17 |        | 5.21  |      | 输卵管因素     | 3701320004844 |
| 24    | 8.82 | 50 | 0.38 | 13.62  | 5.21  | 0.9  | 输卵管因素     | 3701320004786 |
| 19.53 | 7.18 | 41 | 0.15 |        | 12.97 |      | 输卵管因素     | 3701320004230 |
| 21.2  | 5.63 | 49 | 0.40 | 376.09 | 3.17  |      | 输卵管因素     | 3701320004893 |
| 22.7  | 7.23 | 34 | 0.30 |        | 8.28  | 0.64 | 多囊卵巢综合    | 3701320004763 |
| 20    | 8.15 | 41 | 0.58 |        | 7.24  |      | 输卵管因素     | 3701320004796 |
| 20    | 9.82 | 52 | 0.32 |        | 6.35  |      | 多囊卵巢综合    | 3701320004864 |
| 29.3  | 5.77 | 37 | 0.42 | 235.74 | 9.97  | 2.05 | 多囊卵巢综合    | 3701320004811 |
| 23.5  | 3.98 | 44 | 0.59 | 390.5  | 4.89  | 0.35 | 多囊卵巢综合    | 3701320004830 |
| 26.84 | 5.33 | 57 | 0.05 | 152.85 | 10.08 | 1.77 | 输卵管因素     | 3701320004370 |
| 21.9  | 7.73 | 30 | 0.10 | 279.2  | 5.61  | 1.67 | 多囊卵巢综合    | 3701320004799 |
| 22    | 3.49 | 54 | 0.26 |        | 6.65  |      | 输卵管因素     | 3701320004758 |
|       | 5.12 | 38 | 0.14 | 15.33  | 3.41  | 0.28 | 输卵管因素     | 3701320004707 |
| 20.8  | 7.75 | 40 | 0.70 |        | 5.21  |      | 多囊卵巢综合    | 3701320004754 |
| 25.7  | 5.11 | 39 | 0.26 | 257.16 | 11.61 | 3.09 | 多囊卵巢综合    | 3701320004860 |
| 20.3  | 6.21 | 26 | 0.72 | 163.03 | 9.91  | 1.42 | 多囊卵巢综合    | 3701320004819 |
| 19.5  | 8.07 | 36 | 0.32 |        | 8.85  |      | 输卵管因素     | 3701320004756 |
| 23.4  | 5.71 | 65 | 0.24 |        | 4.91  |      | 输卵管因素     | 3701320004793 |
| 29.1  | 5.30 | 33 | 0.79 | 12.22  | 12.64 |      | 多囊卵巢综合    | 3701320004894 |
| 30.4  | 9.75 | 41 | 0.13 | 344.29 | 8.01  |      | 多囊卵巢综合    | 3701320004801 |
| 23.4  | 7.32 | 24 | 0.65 |        | 4.88  |      | 输卵管因素     | 3701320004775 |
| 32.3  | 8.91 | 36 | 0.13 |        | 5.65  |      | 多囊卵巢综合    | 3701320004865 |
| 32    | 5.03 | 47 | 0.47 |        | 2.97  |      | 多囊卵巢综合    | 3701320004938 |
| 24    | 1.62 | 55 | 0.35 | 11.23  | 8.41  | 0.82 | 输卵管因素     | 3701320005065 |
| 26.2  | 6.32 | 28 | 0.51 |        | 6.7   |      | 多囊卵巢综合    | 3701320004859 |
| 25.8  | 5.65 | 38 | 0.18 |        | 5.2   |      | 多囊卵巢综合    | 3701320004843 |
| 19.1  | 7.05 | 27 | 0.17 | 239.98 | 4.71  |      | 输卵管因素     | 3701320004834 |
| 25    | 8.52 | 41 | 0.47 | 193.77 | 2.88  | 1.74 | 高龄, 输卵管因素 | 3701320004852 |
| 23.7  | 8.15 | 56 | 0.39 | 410.64 | 5.39  | 3.23 | 输卵管因素     | 3701320004930 |
| 21.5  | 6.48 | 47 | 0.68 |        | 5.13  |      | 输卵管因素     | 3701320004808 |
| 20.7  | 7.46 | 23 | 0.29 | 9.11   | 4.83  | 0.26 | 输卵管因素     | 3701320004806 |
| 25.6  | 4.21 | 39 | 0.71 | 13.83  | 2.43  | 0.45 | 输卵管因素     | 3701320004904 |
| 24    | 2.70 | 65 | 0.09 | 355.95 | 5.74  | 1.08 | 输卵管因素     | 3701320004869 |
| 28.1  | 7.94 | 16 | 0.15 | 10.09  | 6     | 0.74 | 输卵管因素     | 3701320004923 |
| 20.8  | 7.99 | 72 | 0.63 | 202.04 | 10.39 | 1.01 | 输卵管因素     | 3701320004817 |
| 23    | 5.31 | 30 | 0.29 |        | 5.69  |      | 多囊卵巢综合    | 3701320004845 |
| 23.88 | 4.52 | 27 | 0.09 |        | 4.21  |      | 输卵管因素     | 3701320002362 |
| 29.3  | 3.25 | 32 | 0.27 | 331.57 | 3.36  | 1.94 | 输卵管因素     | 3701320004841 |
| 21.3  | 6.66 | 59 | 0.69 | 275.6  | 4.55  |      | 高龄, 输卵管因素 | 3701320004829 |
| 30    | 7.23 | 42 | 0.15 |        | 3.86  |      | 输卵管因素     | 3701320004905 |
| 22.7  | 6.27 | 34 | 0.53 |        | 8.58  |      | 多囊卵巢综合    | 3701320004826 |
| 21.1  | 7.15 | 38 | 0.74 | 301.04 | 5.55  | 1.49 | 输卵管因素     | 3701320004816 |
| 20.7  | 6.86 | 62 | 0.27 | 151.16 | 10.31 | 2.85 | 输卵管因素     | 3701320005010 |

|       |      |    |      |        |       |      |           |               |
|-------|------|----|------|--------|-------|------|-----------|---------------|
| 29.3  | 5.28 | 59 | 0.20 | 325.63 | 2.18  | 0.69 | 多囊卵巢综合    | 3701320004554 |
| 22.9  | 7.88 | 37 | 0.52 | 696.63 | 11.56 |      | 输卵管因素     | 3701320004785 |
| 25    | 10.3 | 38 | 0.35 | 161.76 | 2.6   |      | 输卵管因素     | 3701320004870 |
| 23.9  | 5.08 | 32 | 0.63 | 645.75 | 11.08 | 2.32 | 多囊卵巢综合    | 3701320004939 |
| 25.4  | 7.88 | 15 | 0.76 |        | 6     |      | 多囊卵巢综合    | 3701320004868 |
| 21.2  | 6.03 | 50 | 0.68 | 108.97 | 2.03  | 0.45 | 高龄, 输卵管因素 | 3701320004821 |
| 31.2  | 7.01 | 57 | 0.58 | 282.6  | 2.85  | 1.46 | 输卵管因素     | 3701320004853 |
| 26    | 7.24 | 41 | 0.57 |        | 4.14  |      | 输卵管因素     | 3701320004854 |
| 21.5  | 9.23 | 54 | 0.61 |        | 9.7   |      | 多囊卵巢综合    | 3701320005031 |
| 26.2  | 3.76 | 85 | 0.17 | 202.88 | 4.96  | 1.21 | 高龄, 输卵管因素 | 3701320004903 |
| 21.4  | 7.24 | 25 | 0.25 | 95.61  | 7.85  | 1.46 | 输卵管因素     | 3701320004946 |
| 29.1  | 6.03 | 44 | 0.42 | 4.87   | 5.26  |      | 输卵管因素     | 3701320004959 |
| 24    | 7.86 | 35 | 0.32 | 172.36 | 3.33  | 2.26 | 输卵管因素     | 3701320004985 |
| 21.48 | 9.70 | 34 | 0.42 | 8575.4 | 4.41  |      | 输卵管因素     | 3701320002207 |
| 24.77 | 6.94 | 29 | 0.45 | 11.12  | 4.01  | 0.83 | 多囊卵巢综合    | 370132003622  |
| 20.7  | 7.99 | 78 | 0.57 | 305.28 | 5     | 1.56 | 输卵管因素     | 3701320004935 |
| 25.7  | 7.10 | 59 | 0.24 | 11.1   | 4.85  |      | 输卵管因素     | 3701320005029 |
| 22.6  | 6.48 | 10 | 0.75 |        | 5.1   |      | 输卵管因素     | 3701320004977 |
| 20.8  | 5.06 | 71 | 0.35 |        | 3.26  |      | 高龄, 输卵管因素 | 3701320004909 |
| 24.8  | 6.10 | 18 | 0.73 |        | 2.8   |      |           | 3701320005035 |
| 30.8  | 7.83 | 11 | 0.39 |        | 4.03  |      | 多囊卵巢综合    | 3701320004986 |
| 29.1  | 4.49 | 74 | 0.39 | 213.7  | 10.1  |      | 多囊卵巢综合    | 3701320004979 |
| 22.06 | 7.78 | 77 | 0.69 |        | 6.36  |      | 输卵管因素     | 3701320003976 |
| 19.4  | 4.77 | 25 | 0.52 |        | 4.02  |      | 输卵管因素     | 3701320005062 |
| 20.6  | 6.18 | 44 | 0.20 |        | 8.33  |      | 输卵管因素     | 3701320004967 |
| 24.8  | 5.26 | 44 | 0.46 |        | 6.56  |      | 子宫内位      | 3701320004922 |
| 23.9  | 3.79 | 23 | 0.11 | 240.83 | 5.46  | 1.25 | 输卵管因素     | 3701320005011 |
| 25.7  | 2.15 | 79 | 0.52 | 106.85 | 6.25  |      | 多囊卵巢综合    | 3701320005044 |
| 24.2  | 8.81 | 29 | 0.63 | 468.94 | 6.45  | 1.74 | 输卵管因素     | 3701320005067 |
| 34.6  | 4.09 | 32 | 0.10 | 256.73 | 4.1   | 1.94 | 多囊卵巢综合    | 3701320005113 |
| 20.8  | 4.68 | 7  | 0.36 | 12.38  | 7.05  | 0.45 | 输卵管因素     | 3701320005061 |
| 29.3  | 7.18 | 53 | 0.20 |        | 5.49  |      | 多囊卵巢综合    | 3701320004951 |
| 24.8  | 7.23 | 15 | 0.29 | 338.35 | 6.42  | 2.67 | 多囊卵巢综合    | 3701320005017 |
| 20.2  | 7.85 | 38 | 0.35 | 291.92 | 8.56  | 1.7  | 输卵管因素     | 3701320004969 |
| 30.9  | 6.11 | 56 | 0.31 |        | 8.21  |      | 多囊卵巢综合    | 3701320005078 |
| 20.7  | 6.25 | 63 | 0.42 | 400.47 | 3.07  |      | 子宫内位      | 3701320004990 |
| 21.5  | 7.16 | 33 | 0.55 | 191.65 | 2.89  |      | 输卵管因素     | 3701320005023 |
| 25    | 7.54 | 57 | 0.78 | 10.55  | 3.11  | 0.26 | 输卵管因素     | 3701320004484 |
| 23.4  | 8.91 | 61 | 0.64 | 220.6  | 6.42  |      |           | 3701320004980 |
| 21    | 7.78 | 39 | 0.47 |        | 7.2   |      | 输卵管因素     | 3701320005075 |
| 20.4  | 3.01 | 19 | 0.16 |        | 3.21  |      | 输卵管因素     | 3701320004983 |
| 23.9  | 6.64 | 31 | 0.14 | 525.34 | 4.52  | 1.46 | 输卵管因素     | 3701320004978 |
| 24.1  | 4.82 | 69 | 0.66 |        | 6.95  |      | 多囊卵巢综合    | 3701320004833 |
| 22.7  | 7.13 | 29 | 0.52 |        | 4.33  |      | 输卵管因素     | 3701320004992 |
| 23.4  | 8.11 | 0  | 0.11 |        | 6.36  |      | 输卵管因素     | 3701320005097 |
| 18    | 6.01 | 24 | 0.82 | 300.48 | 5.28  | 0.41 | 输卵管因素     | 3701320005036 |
| 26.6  | 5.95 | 49 | 0.13 | 12.67  | 11.61 | 0.44 | 多囊卵巢综合    | 3701320005001 |
| 19.6  | 8.53 | 50 | 0.26 |        | 9.26  |      | 输卵管因素     | 3701320005052 |
| 21.9  | 5.40 | 78 | 0.17 | 259.49 | 9.92  | 1.01 | 多囊卵巢综合    | 3701320005013 |
| 20.5  | 4.77 | 15 | 0.28 |        | 3.01  |      | 高龄, 输卵管因素 | 3701320005003 |

|       |      |    |      |        |       |       |           |               |
|-------|------|----|------|--------|-------|-------|-----------|---------------|
| 25.3  | 7.96 | 33 | 0.42 |        | 4.25  |       | 输卵管因素     | 3701320005095 |
| 31.9  | 7.08 | 63 | 0.15 |        | 6.23  |       | 输卵管因素     | 3701320005172 |
| 20    | 7.42 | 32 | 0.52 |        | 8.78  |       | 多囊卵巢综合    | 3701320005054 |
| 20.2  | 6.20 | 23 | 0.67 | 887.43 | 4.23  | 1.53  | 输卵管因素     | 3701320005045 |
| 26.2  | 6.73 | 38 | 0.12 | 426.97 | 4.18  | 2.01  | 多囊卵巢综合    | 3701320005202 |
| 23    | 7.32 | 38 | 0.69 |        | 5.14  |       | 输卵管因素     | 3701320005069 |
| 27.3  | 5.03 | 21 | 0.18 | 162.82 | 3.89  | 1.63  | 多囊卵巢综合    | 3701320005118 |
| 36.7  | 4.04 | 32 | 0.51 |        | 4.58  |       | 输卵管因素     | 3701320005079 |
| 23.5  | 6.30 | 21 | 0.72 | 18     | 5.28  | 16.6  | 输卵管因素     | 3701320005120 |
| 24.17 | 7.56 | 26 | 0.40 |        | 7.32  |       | 输卵管因素     | 3701320002898 |
| 23.4  | 5.49 | 35 | 0.05 | 315.67 | 6.07  | 79.12 | 输卵管因素     | 37013400064   |
| 22.74 | 7.36 | 57 | 0.73 | 182.74 | 5.76  | 1.8   | 输卵管因素     | 3701320004540 |
| 21.88 | 5.44 | 15 | 0.56 |        | 4.75  |       | 输卵管因素     | 3701320001498 |
| 31.3  | 6.67 | 77 | 0.26 | 150.1  | 3.88  | 1.15  | 输卵管因素     | 3701320005088 |
| 20    | 6.89 | 35 | 0.67 | 264.15 | 5.72  | 1.04  | 输卵管因素     | 3701320005161 |
| 29.1  | 7.80 | 19 | 0.50 | 16.55  | 5.89  | 0.63  | 多囊卵巢综合    | 3701320005155 |
| 19.5  | 6.07 | 62 | 0.40 |        | 10.69 |       | 多囊卵巢综合    | 3701320005123 |
| 23.44 | 7.36 | 66 | 0.72 | 642.7  | 4.34  | 0.53  | 输卵管因素     | 3701320004356 |
| 23.5  | 6.27 | 41 | 0.78 | 199.07 | 6.85  | 1.94  | 多囊卵巢综合    | 3701320005142 |
| 21.59 | 5.82 | 39 | 0.67 |        | 2.78  |       | 输卵管因素     | 3701320005171 |
| 24.4  | 4.84 | 27 | 0.64 | 270.51 | 5.41  | 1.67  | 多囊卵巢综合    | 3701320005117 |
| 22.6  | 5.07 | 60 | 0.72 | 358.7  | 2.83  | 1.42  | 输卵管因素     | 3701320005125 |
| 22.9  | 7.49 | 57 | 0.43 |        | 4.56  |       | 多囊卵巢综合    | 3701320005179 |
| 26.7  | 3.71 | 31 | 0.82 |        | 2.34  |       | 输卵管因素     | 3701320005091 |
| 29    | 3.89 | 33 | 0.37 | 7.54   | 9.48  |       | 多囊卵巢综合    | 3701320005157 |
| 21.6  | 6.57 | 39 | 0.52 | 437.57 | 3     | 2.01  | 输卵管因素     | 3701320005152 |
| 22.3  | 5.27 | 64 | 0.34 | 319.27 | 6.79  | 1.77  | 输卵管因素     | 3701320005159 |
| 21.3  | 7.22 | 31 | 0.47 |        | 6.73  |       | 输卵管因素     | 3701320005108 |
| 22.6  | 6.87 | 72 | 0.23 |        | 4.48  |       |           | 3701320005227 |
| 26.5  | 7.91 | 40 | 0.24 |        | 3.29  |       | 高龄, 输卵管因素 | 3701320005151 |
| 27.6  | 4.69 | 52 | 0.36 |        | 6.41  |       | 高龄, 输卵管因素 | 3701320005132 |
| 19.11 | 6.10 | 25 | 0.36 | 10.1   | 6.2   | 0.2   | 输卵管因素     | 3701320003862 |
| 17.9  | 7.69 | 64 | 0.43 | 360.61 | 4.08  | 1.53  | 输卵管因素     | 3701320005330 |
| 20.5  | 7.54 | 51 | 0.42 | 272    | 2.96  | 1.28  | 输卵管因素     | 3701320005228 |
| 24    | 4.05 | 26 | 0.16 |        | 4.23  |       | 输卵管因素     | 3701320005188 |
| 24.6  | 5.26 | 42 | 0.15 |        | 2.82  |       | 输卵管因素     | 3701320005368 |
| 26    | 8.36 | 27 | 0.68 |        | 5.79  |       | 输卵管因素     | 3701320005136 |
| 23.4  | 7.64 | 71 | 0.23 |        | 3.38  |       | 输卵管因素     | 3701320005217 |
| 21.41 | 3.82 | 31 | 0.05 |        | 6.93  |       | 输卵管因素     | 3701320004150 |
| 23.2  | 6.84 | 29 | 0.42 | 210.09 | 8.16  | 1.08  | 输卵管因素     | 3701320005133 |
| 21.3  | 7.11 | 39 | 0.54 | 28.05  | 8.18  | 0.43  | 输卵管因素     | 3701320005185 |
| 29.9  | 6.42 | 37 | 0.16 |        | 12.23 | 0.35  | 输卵管因素     | 3701320005204 |
| 23.7  | 7.40 | 45 | 0.79 | 184.44 | 7.16  |       | 高龄, 输卵管因素 | 3701320005145 |
| 25.39 | 3.15 | 12 | 0.54 |        | 5.22  |       | 输卵管因素     | 3701320004229 |
| 22.58 | 7.35 | 56 | 0.77 | 213.91 | 2.67  | 1.49  | 输卵管因素     | 3701320004589 |
| 20.3  | 7.88 | 32 | 0.30 | 216.24 | 3.72  |       | 输卵管因素     | 3701320005160 |
| 27.3  | 7.86 | 2  | 0.12 | 166.42 | 3.22  | 1.84  | 输卵管因素     | 3701320005119 |
| 27.1  | 7.94 | 42 | 0.43 |        | 4.21  |       | 多囊卵巢综合    | 3701320005153 |
| 23.3  | 6.27 | 43 | 0.48 | 327.96 | 7.25  |       | 多囊卵巢综合    | 3701320005149 |
| 21.5  | 5.71 | 77 | 0.17 |        | 3.78  |       | 输卵管因素     | 3701320005189 |

|       |      |    |      |        |       |      |           |               |
|-------|------|----|------|--------|-------|------|-----------|---------------|
| 22.3  | 8.29 | 27 | 0.14 | 161.76 | 4.25  | 1.28 | 输卵管因素     | 3701320005210 |
| 26.7  | 6.60 | 65 | 0.52 |        | 3.31  |      | 输卵管因素     | 370132000309  |
| 24    | 7.63 | 38 | 0.22 | 329.66 | 3.57  | 1.84 | 输卵管因素     | 3701320005203 |
| 21.5  | 8.2  | 29 | 0.26 |        | 4.34  |      | 输卵管因素     | 3701320005177 |
| 25.4  | 7.86 | 56 | 0.67 | 196.52 | 2.81  | 1.04 | 高龄, 输卵管因素 | 3701320005181 |
| 22.8  | 0.88 | 18 | 0.53 | 76.11  | 4.29  | 1.01 | 多囊卵巢综合    | 3701320005190 |
| 22.8  | 9.27 | 36 | 0.34 |        | 5.33  |      | 输卵管因素     | 3701320005176 |
| 23.4  | 5.69 | 27 | 0.47 | 10.37  | 3.32  |      | 多囊卵巢综合    | 3701320005191 |
| 21.6  | 7.64 | 43 | 0.17 |        | 4.23  |      | 输卵管因素     | 370132000892  |
| 28.04 | 6.53 | 59 | 0.78 | 165.15 | 2.61  | 1.25 | 输卵管因素, 性  | 3701320005255 |
| 16.6  | 8.98 | 59 | 0.17 | 16.05  | 5.24  | 0.6  | 输卵管因素     | 3701320005236 |
| 23.6  | 7.55 | 45 | 0.27 | 15.42  | 5.48  | 0.31 | 输卵管因素     | 3701320005240 |
| 20.7  | 6.65 | 38 | 0.42 | 292.35 | 10.89 | 1.15 | 输卵管因素     | 3701320005232 |
| 22.7  | 8.61 | 45 | 0.16 | 587.45 | 5.78  | 1.32 | 输卵管因素     | 3701320005212 |
| 19.2  | 5.75 | 35 | 0.14 | 113.87 | 3.97  | 1.36 | 输卵管因素     | 3701320005216 |
| 20.3  | 6.49 | 76 | 0.53 |        | 7.8   |      | 多囊卵巢综合    | 3701320005183 |
| 24.8  | 9.68 | 57 | 0.69 |        | 6.88  |      | 免疫性不孕症    | 3701320005199 |
| 24    | 5.22 | 48 | 0.74 |        | 4.77  |      | 多囊卵巢综合    | 3701320005211 |
| 22.1  | 7.2  | 38 | 0.42 |        | 2.93  |      | 输卵管因素     | 3701320005200 |
| 35.9  | 5.10 | 62 | 0.10 | 144.8  | 3     | 1.21 | 输卵管因素     | 3701320005334 |
| 23.4  | 7.64 | 32 | 0.57 | 218.15 | 5.23  | 1.35 | 输卵管因素     | 3701320005251 |
| 19.2  | 7.74 | 46 | 0.59 | 177.44 | 5.82  | 1.6  | 输卵管因素     | 3701320005220 |
| 21.8  | 9.08 | 41 | 0.52 | 5.35   | 8.52  | 36.1 | 输卵管因素     | 3701320005207 |
| 20.8  | 6.93 | 32 | 0.37 | 12.06  | 6.91  | 0.47 | 输卵管因素     | 3701320005282 |
| 22.9  | 8.29 | 58 | 0.59 | 488.02 | 5.07  | 1.6  | 输卵管因素     | 3701320005329 |
| 32.8  | 6.52 | 34 | 0.56 | 408.74 | 2.82  | 1.53 | 输卵管因素     | 3701320005268 |
| 23.5  | 9.25 | 20 | 0.71 |        | 5.85  |      | 输卵管因素     | 3701320005270 |
| 22.04 | 5.28 | 15 | 0.89 |        | 4.58  |      | 多囊卵巢综合    | 3701320005222 |
| 20.4  | 8.24 | 74 | 0.74 | 27.35  | 7.03  | 1.25 |           | 3701320005237 |
| 25.4  | 7.17 | 18 | 0.68 | 196.95 | 8.05  | 0.28 | 输卵管因素     | 3701320005243 |
| 20.7  | 5.89 | 17 | 0.43 | 256.31 | 5.85  | 1.74 | 多囊卵巢综合    | 3701320005233 |
| 19.5  | 7.35 | 45 | 0.16 | 334.96 | 5.32  | 0.97 | 子宫内膜异位    | 3701320005277 |
| 22.2  | 6.97 | 26 | 0.55 | 22.52  | 3.45  | 0.46 | 输卵管因素     | 3701320005290 |
| 20.2  | 7.71 | 43 | 0.18 | 385.2  | 5.2   |      | 输卵管因素     | 3701320005244 |
| 22.5  | 7.88 | 25 | 0.60 |        | 4.8   |      | 输卵管因素     | 3701320005248 |
| 30.1  | 4.89 | 20 | 0.73 | 16.37  | 8.78  | 0.4  | 输卵管因素     | 3701320005264 |
| 28.5  | 8.54 | 17 | 0.32 | 20.37  | 10.17 | 1.44 | 输卵管因素     | 3701320005263 |
| 23.7  | 4.17 | 61 | 0.53 | 264.79 | 6.64  | 1.91 | 多囊卵巢综合    | 3701320005289 |
| 30.1  | 5.95 | 14 | 0.92 |        | 2.48  |      | 输卵管因素     | 3701320005296 |
| 24.1  | 7.27 | 40 | 0.68 | 174.48 | 3.2   | 0.97 | 输卵管因素     | 3701320005304 |
| 25.7  | 5.11 | 39 | 0.36 | 257.16 | 11.61 | 3.09 | 多囊卵巢综合    | 3701320004860 |
| 18.8  | 7.61 | 18 | 0.12 | 34.8   | 6.82  | 0.46 | 输卵管因素     | 3701320005265 |
| 22.5  | 4.62 | 28 | 1.21 |        | 3.06  |      |           | 3701320005370 |
| 25.39 | 6.35 | 61 | 0.36 |        | 9.13  |      | 输卵管因素     | 3701320002870 |
| 27.5  | 6.00 | 20 | 0.54 | 165.57 | 3.5   | 1.42 | 多囊卵巢综合    | 3701320005313 |
| 23.4  | 6.62 | 30 | 1.05 |        | 2.92  |      | 输卵管因素     | 3701320005271 |
| 19.6  | 9.71 | 22 | 0.42 | 241    | 5.08  |      | 输卵管因素     | 3701320005310 |
| 20.81 | 7.78 | 72 | 0.18 |        | 4.92  |      | 输卵管因素, 性  | 3701320004818 |
| 23.4  | 6.27 | 14 | 0.73 | 15.89  | 3.76  | 0.41 | 输卵管因素     | 3701320005241 |
| 24.8  | 7.89 | 14 | 0.35 |        | 2.07  |      | 输卵管因素     | 3701320005274 |

|       |      |    |      |         |       |      |             |               |
|-------|------|----|------|---------|-------|------|-------------|---------------|
| 24.2  | 8.12 | 44 | 0.25 |         | 4.95  |      | 输卵管因素       | 3701320005287 |
| 26.3  | 6.05 | 45 | 0.63 |         | 10.38 |      | 输卵管因素       | 3701320005528 |
| 26    | 5.29 | 19 | 0.53 | 6.04    | 6.31  | 0.6  | 输卵管因素       | 3701320005257 |
| 25.6  | 7.61 | 53 | 0.75 | 507.74  | 7     | 1.7  |             | 37013400066   |
| 27.5  | 7.35 | 21 | 0.67 | 11.92   | 6.79  | 0.52 | 输卵管因素       | 3701320005283 |
| 25.64 | 5.12 | 33 | 0.65 |         | 8.23  |      | 多囊卵巢综合      | 3701320005390 |
| 24.8  | 7.19 | 16 | 0.17 |         | 4.32  |      | 多囊卵巢综合      | 3701320005294 |
| 24.2  | 4.70 | 32 | 0.77 | 332.2   | 2.86  |      | 多囊卵巢综合      | 3701320005392 |
| 21.5  | 5.04 | 62 | 0.41 |         | 4.2   |      | 输卵管因素       | 3701320005306 |
| 19.6  | 7.57 | 13 | 0.59 | 261.61  | 4.62  | 1.42 | 输卵管因素       | 3701320005311 |
| 23    | 4.86 | 31 | 0.84 | 10.31   | 3.85  | 0.61 | 子宫内异位       | 3701320005276 |
| 24.7  | 7.93 | 49 | 0.58 | 343.23  | 6.17  | 0.8  | 输卵管因素       | 3701320005399 |
| 26    | 7.65 | 57 | 0.54 | 360.19  | 7.88  | 2.6  | 多囊卵巢综合      | 3701320005362 |
| 23.1  | 6.38 | 46 | 0.31 | 412.98  | 5.69  | 1.84 | 多囊卵巢综合      | 3701320005323 |
| 21.9  | 6.09 | 33 | 0.01 |         | 3.35  |      | 输卵管因素       | 3701320005378 |
| 19.9  | 7.81 | 26 | 0.41 | 5846.96 | 6.32  | 0.5  | 输卵管因素       | 3701320005347 |
| 29.7  | 4.88 | 38 | 0.11 | 153.91  | 7.69  |      | 多囊卵巢综合      | 3701320005458 |
| 23.8  | 7.78 | 40 | 0.57 | 136.74  | 3.41  | 2.15 | 输卵管因素       | 3701320005385 |
| 19.1  | 6.91 | 68 | 0.03 |         | 10.7  |      | 输卵管因素       | 3701320005380 |
| 24.4  | 7.26 | 41 | 0.68 | 263.94  | 3.94  | 1.32 | 子宫内异位       | 3701320005365 |
| 25.5  | 4.75 | 40 | 0.73 | 285.99  | 5     | 1.39 | 多囊卵巢综合      | 3701320005341 |
| 19.23 | 6.95 | 14 | 0.71 |         | 2.95  |      | 输卵管因素       | 3701320002779 |
| 19.6  | 9.41 | 33 | 0.21 | 198.64  | 3.11  |      | 输卵管因素       | 3701320001420 |
| 24.97 | 7.16 | 61 | 0.56 | 425.7   | 8.76  | 0.5  | 高龄, 输卵管因素   | 3701320004546 |
| 20.31 | 7.28 | 60 | 0.66 | 287.68  | 5.63  |      | 输卵管因素       | 3701320004290 |
| 20.7  | 7.84 | 25 | 0.69 |         | 5.58  |      | 输卵管因素       | 3701320005404 |
| 24.8  | 6.85 | 70 | 0.29 | 365.28  | 2.88  | 1.39 | 高龄, 输卵管因素   | 3701320005303 |
| 22    | 7.17 | 43 | 0.76 | 332.2   | 2.22  |      | 输卵管因素       | 3701320005352 |
| 22.9  | 5.31 | 69 | 0.76 | 298.07  | 7.65  |      | 多囊卵巢综合      | 3701320005429 |
| 25.8  | 7.72 | 43 | 0.58 |         | 5.46  |      | 多囊卵巢综合      | 3701320005395 |
| 19.9  | 7.44 | 21 | 0.55 |         | 3.49  |      |             | 3701320005457 |
| 25.6  | 3.55 | 33 | 0.62 | 164.72  | 4.35  | 1.98 | 高龄, 输卵管因素   | 3701320005509 |
| 27.9  | 8.42 | 17 | 0.58 |         | 2.78  |      | 输卵管因素       | 3701320005506 |
| 24.14 | 6.69 | 26 | 0.26 | 265.21  | 3.41  | 0.36 |             | 3701320004491 |
| 37.3  | 7.49 | 38 | 0.87 | 257.79  | 3.15  | 1.25 | 输卵管因素       | 3701320005573 |
| 22.2  | 4.93 | 22 | 0.62 |         | 4.92  |      | 输卵管因素       | 3701320005455 |
| 21.6  | 7.37 | 70 | 0.34 | 337.08  | 3.82  | 1.8  | 输卵管因素       | 3701320005387 |
| 19.7  | 4.79 | 44 | 0.30 |         | 8.02  |      | 输卵管因素       | 3701320005398 |
| 20.7  | 5.55 | 25 | 0.29 |         | 5.36  |      | 多囊卵巢综合      | 3701320005448 |
| 23.4  | 6.34 | 29 | 0.63 |         | 2.68  |      | 输卵管因素       | 3701320005397 |
| 19    | 7.53 | 40 | 0.17 |         | 6.3   |      | 卵巢早衰, 输卵管因素 | 3701320005547 |
| 30.4  | 4.92 | 49 | 0.54 | 327.75  | 3.94  | 1.63 | 多囊卵巢综合      | 3701320005414 |
| 22.3  | 5.75 | 21 | 0.74 |         | 3.23  |      | 输卵管因素       | 3701320005421 |
| 31.1  | 4.77 | 52 | 0.46 |         | 6.56  |      | 输卵管因素       | 37013400068   |
| 19.5  | 6.41 | 63 | 0.16 | 217.09  | 7.88  | 1.39 | 多囊卵巢综合      | 3701320005459 |
| 27.5  | 5.49 | 44 | 0.73 | 12.11   | 2.27  | 0.74 | 输卵管因素       | 3701320005438 |
| 23.5  | 7.92 | 32 | 0.21 | 9.82    | 5.29  | 0.35 | 输卵管因素       | 3701320005474 |
| 29.2  | 5.55 | 25 | 0.16 |         | 2.83  | 0.95 | 高龄          | 3701320005592 |
| 20.8  | 5.50 | 25 | 0.65 | 153.06  | 5.86  | 1.28 | 高龄, 输卵管因素   | 3701320005447 |
| 21.5  | 6.37 | 30 | 0.36 | 16.91   | 4.04  |      | 输卵管因素       | 3701320005443 |

|       |      |    |      |         |      |      |           |               |
|-------|------|----|------|---------|------|------|-----------|---------------|
| 32.7  | 4.26 | 30 | 0.43 | 544.84  | 2.63 | 1.39 | 多囊卵巢综合    | 3701320005500 |
| 21.4  | 6.56 | 38 | 0.37 | 60.5    | 3.87 | 0.69 | 输卵管因素     | 37013400067   |
| 22.6  | 6.89 | 49 | 0.63 |         | 2.25 |      | 输卵管因素     | 3701320005464 |
| 20.7  | 8.76 | 22 | 0.70 |         | 2.73 |      | 输卵管因素     | 3701320002949 |
| 20.6  | 6.18 | 44 | 0.40 |         | 8.33 |      | 输卵管因素     | 3701320004967 |
| 19.5  | 7.92 | 34 | 0.34 | 468.1   | 6.03 | 0.19 | 多囊卵巢综合    | 3701320005396 |
| 27.3  | 5.64 | 30 | 0.24 | 278.14  | 3.48 | 1.11 | 输卵管因素     | 3701320005508 |
| 24.8  | 7.97 | 36 | 0.18 |         | 5.43 |      | 多囊卵巢综合    | 3701320003630 |
| 22.2  | 4.78 | 56 | 0.72 | 355.31  | 3.3  | 1.56 | 输卵管因素     | 3701320005512 |
| 27.1  | 7.93 | 19 | 0.68 |         | 4.89 |      | 输卵管因素     | 3701320005462 |
| 17.6  | 7.6  | 50 | 0.76 | 311.8   | 9.26 | 0.39 | 输卵管因素     | 3701320005469 |
| 24.8  | 7.25 | 28 | 0.65 |         | 2.7  |      | 输卵管因素     | 3701320005484 |
| 19.1  | 3.90 | 47 | 0.55 |         | 3.26 |      |           | 3701320005156 |
| 23.7  | 5.94 | 64 | 0.16 |         | 4.94 |      | 输卵管因素     | 3701320005486 |
| 19.5  | 4.74 | 22 | 0.47 |         | 3.94 |      | 输卵管因素     | 3701320005695 |
| 24.5  | 8.96 | 37 | 0.29 | 222.18  | 9.08 | 2.6  | 输卵管因素     | 3701320005542 |
| 19.1  | 7.56 | 27 | 0.52 | 157.3   | 7.03 | 0.73 | 输卵管因素     | 3701320005570 |
| 22.9  | 4.91 | 37 | 0.64 | 324.36  | 5.16 | 0.52 | 输卵管因素     | 3701320005461 |
| 25.4  | 9.1  | 26 | 1.29 | 14.94   | 5.86 |      | 输卵管因素     | 3701320005571 |
| 20.8  | 9.28 | 55 | 0.40 | 361.46  | 4.38 | 0.45 | 输卵管因素     | 3701320005470 |
| 24.46 | 7.90 | 25 | 0.20 |         | 3.25 |      | 输卵管因素     | 3701320001630 |
| 20.7  | 5.61 | 11 | 0.74 |         | 2.57 |      | 输卵管因素     | 370132000254  |
| 23.4  | 8.91 | 61 | 0.31 | 220.6   | 6.42 |      |           | 3701320004980 |
| 18.7  | 7.48 | 34 | 0.00 |         | 7.88 |      | 多囊卵巢综合    | 3701320005496 |
| 35.2  | 7.36 | 29 | 0.56 |         | 3.31 |      | 子宫内位      | 3701320005563 |
| 21    | 2.29 | 24 | 1.03 |         | 2.38 |      | 输卵管因素     | 3701320005503 |
| 28    | 7.56 | 37 | 0.50 | 189.95  | 2.29 | 1.25 | 高龄, 输卵管因素 | 3701320005511 |
| 23.8  | 6.82 | 52 | 0.61 | 405.98  | 6.31 | 2.32 | 输卵管因素     | 3701320005499 |
| 17.2  | 5.54 | 37 | 1.11 | 298.71  | 4.79 | 1.21 | 子宫内位      | 3701320005545 |
| 24.2  | 4.87 | 51 | 0.21 |         | 4.03 |      | 输卵管因素     | 37013400069   |
| 20.43 | 5.07 | 42 | 1.05 |         | 6.36 |      | 输卵管因素     | 3701320002155 |
| 26    | 7.44 | 55 | 0.50 |         | 5.02 |      | 输卵管因素     | 3701320005558 |
| 20.4  | 6.30 | 55 | 0.78 | 219.4   | 7.05 |      | 输卵管因素     | 3701320005523 |
| 26.2  | 3.76 | 35 | 0.51 | 202.88  | 3.63 | 1.21 | 高龄, 输卵管因素 | 3701320004903 |
| 24.6  | 6.53 | 53 | 0.15 |         | 2.15 |      | 子宫内位      | 3701320005168 |
| 23.4  | 5.45 | 47 | 0.12 |         | 3.03 |      | 输卵管因素     | 3701320005537 |
| 26.6  | 6.67 | 11 | 0.23 | 209.67  | 2.38 | 1.42 | 输卵管因素     | 3701320005546 |
| 25.71 | 4.30 | 52 | 1.08 | 110.45  | 4.6  | 2.78 | 多囊卵巢综合    | 3701320004621 |
| 22.4  | 6.88 | 34 | 0.21 | 458.56  | 2.88 |      | 输卵管因素     | 3701320005548 |
| 17.6  | 7.34 | 28 | 0.37 | 245.5   | 6.99 | 2.36 | 多囊卵巢综合    | 3701320005596 |
| 20    | 5.57 | 60 | 0.63 |         | 4.94 |      | 输卵管因素     | 3701320005555 |
| 26.67 | 5.77 | 59 | 0.61 |         | 5.06 |      | 输卵管因素     | 3701320004618 |
| 27.3  | 8.74 | 46 | 1.03 | 316.73  | 10.8 | 2.57 | 输卵管因素     | 3701320005562 |
| 24.44 | 4.72 | 42 | 0.18 | 60      | 5.33 | 2.15 | 多囊卵巢综合    | 3701320004492 |
| 20.6  | 2.27 | 39 | 0.51 | 18.48   | 3.08 | 0.12 | 子宫内位      | 3701320005572 |
| 25.4  | 7.69 | 37 | 0.41 |         | 3.14 |      | 输卵管因素     | 3701320005636 |
| 18.4  | 6.07 | 12 | 0.53 | 8.45    | 7.69 | 0.33 | 输卵管因素     | 3701320005569 |
| 22.7  | 6.15 | 50 | 0.63 | 259.49  | 7.28 | 2.36 | 输卵管因素     | 3701320005581 |
| 23.8  | 7.48 | 16 | 0.08 | 211.79  | 5.38 | 1.46 | 输卵管因素, 性  | 3701320005585 |
| 30.8  | 5.57 | 26 | 1.01 | 1403.44 | 3.38 | 6.7  | 输卵管因素     | 3701320005587 |

|       |      |    |      |        |      |        |           |               |
|-------|------|----|------|--------|------|--------|-----------|---------------|
| 23.7  | 7.40 | 45 | 0.07 | 184.44 | 7.16 |        | 高龄, 输卵管因素 | 3701320005145 |
| 29.3  | 4.79 | 15 | 0.36 | 211.36 | 2.27 | 2.71   | 多囊卵巢综合征   | 3701320005640 |
| 22.9  | 6.87 | 28 | 0.24 |        | 3.09 |        | 输卵管因素     | 3701320005647 |
| 21.5  | 8.82 | 76 | 0.52 | 524.28 | 3.6  | 2.85   | 输卵管因素     | 3701320005635 |
| 33.2  | 6.92 | 28 | 0.01 | 410.86 | 2.63 | 1.67   | 输卵管因素     | 3701320005688 |
| 24.8  | 7.77 | 70 | 1.12 | 255.04 | 3.34 | 2.5    | 输卵管因素     | 3701320005607 |
| 22.5  | 7.50 | 31 | 0.38 | 366.97 | 6.2  | 1.21   | 输卵管因素     | 3701320005602 |
| 19.5  | 4.93 | 59 | 0.23 | 166    | 6.71 | 433.92 | 多囊卵巢综合征   | 3701320005599 |
| 25.71 | 9.32 | 13 | 0.03 |        | 10.2 | 0.25   | 多囊卵巢综合征   | 3701320003112 |
| 24.1  | 7.96 | 48 | 0.41 |        | 6.33 | 1.15   | 输卵管因素     | 3701320005648 |
| 27.3  | 7.73 | 73 | 0.23 | 231.29 | 3.06 | 2.43   | 输卵管因素     | 3701320005650 |
| 32.2  | 4.35 | 33 | 0.59 |        | 5.32 |        | 高龄, 输卵管因素 | 3701320005584 |
| 21.5  | 8.31 | 13 | 0.79 | 123.38 | 7.99 | 1.46   | 输卵管因素     | 3701320005641 |
| 18.1  | 8.29 | 26 | 0.46 |        | 9.48 |        | 多囊卵巢综合征   | 3701320005619 |
| 22.03 | 7.55 | 21 | 0.75 | 18.47  | 7.3  | 0.89   | 输卵管因素     | 3701320004406 |
|       | 3.50 | 57 | 0.48 | 393.4  | 5    |        | 输卵管因素     | 3701320005628 |
| 25.39 | 6.89 | 38 | 0.69 | 201.4  | 4.45 | 1.25   | 输卵管因素     | 3701320003671 |
| 23.7  | 6.56 | 22 | 0.23 |        | 5.02 |        | 子宫内膜异位    | 铁321          |
| 18.8  | 5.93 | 35 | 0.35 |        | 4.26 |        |           | 3701320005660 |
| 21.8  | 8.14 | 62 | 0.52 |        | 7.58 |        | 输卵管因素     | 3701320004997 |
| 25.3  | 2.95 | 39 | 1.01 |        | 5.79 |        | 输卵管因素     | 3701320005694 |
| 27.3  | 7.46 | 12 | 0.64 |        | 4.88 |        | 输卵管因素     | 3701320005726 |
| 18.4  | 8.01 | 25 | 0.29 |        | 2.21 |        | 高龄, 输卵管因素 | 3701320005662 |
| 21.9  | 5.28 | 50 | 1.06 | 9.72   | 2.43 | 0.63   | 输卵管因素     | 3701320005626 |
|       | 8.09 | 49 | 0.85 | 188.04 | 5.37 | 1.18   | 输卵管因素     | 3701320004984 |
| 18.8  | 5.85 | 48 | 0.48 | 538.5  | 6.61 | 1.54   | 输卵管因素     | 3701320005639 |
| 24.4  | 9.47 | 29 | 0.32 | 279.42 | 2.65 | 0.8    | 高龄, 输卵管因素 | 3701320005671 |



| ART方式 | 周期类型 | 周期序号 | 治疗方案  | 治疗用药      | H)总用量(GnRH) | H)总天数(GnRH) | G)总用量(GnRH) | G)总天数(GnRH) |
|-------|------|------|-------|-----------|-------------|-------------|-------------|-------------|
| 体外受精  | 新鲜周期 | 2    | 短效长方案 | 达必佳 (短效)  | 2000        | 10          | 450         | 2           |
| 体外受精  | 新鲜周期 | 1    | 短效长方案 | 达必佳 (短效)  | 2200        | 11          | 1650        | 11          |
| 体外受精  | 新鲜周期 | 1    | 短效长方案 | 达必佳 (短效)  | 1275        | 10          | 450         | 3           |
| 体外受精  | 新鲜周期 | 1    | 短效长方案 | 达菲林(长效),  | 2000        | 10          | 1500        | 10          |
| 体外受精  | 新鲜周期 | 1    | 短效长方案 | 达必佳 (短效)  | 1100        | 11          | 3300        | 11          |
| 体外受精  | 新鲜周期 | 1    | 短效长方案 | 克罗米芬, 达必佳 | 1200        | 8           | 1800        | 8           |
| 体外受精  | 新鲜周期 | 1    | 短效长方案 | 达必佳 (短效)  | 1725        | 10          | 1575        | 10          |
| 体外受精  | 新鲜周期 | 1    | 短效长方案 | 达必佳 (短效)  | 1050        | 7           | 300         | 2           |
| 体外受精  | 新鲜周期 | 1    | 短效长方案 | 达必佳 (短效)  | 1050        | 7           | 825         | 7           |
| 体外受精  | 新鲜周期 | 1    | 短效长方案 | 达必佳 (短效)  | 1350        | 9           | 2475        | 11          |
| 体外受精  | 新鲜周期 | 1    | 短效长方案 | 达菲林(短效),  | 1800        | 9           | 450         | 3           |
| 体外受精  | 新鲜周期 | 1    | 短效长方案 | 达菲林(短效),  | 2000        | 11          | 2025        | 13          |
| 体外受精  | 新鲜周期 | 1    | 短效长方案 | 达菲林(短效),  | 900         | 7           | 1500        | 8           |
| 体外受精  | 新鲜周期 | 1    | 短效长方案 | 达必佳 (短效)  | 1125        | 9           | 3825        | 12          |
| 体外受精  | 新鲜周期 | 1    | 短效长方案 | 达菲林(短效),  | 700         | 7           | 675         | 5           |
| 体外受精  | 新鲜周期 | 1    | 短效长方案 | 达必佳 (短效)  | 950         | 10          | 450         | 4           |
| 体外受精  | 新鲜周期 | 1    | 短效长方案 | 达必佳 (短效)  | 1350        | 10          | 750         | 4           |
| 体外受精  | 新鲜周期 | 1    | 短效长方案 | 达菲林(短效),  | 1500        | 12          | 975         | 7           |
| 体外受精  | 新鲜周期 | 1    | 短效长方案 | 达必佳 (短效)  | 1400        | 7           | 2175        | 12          |
| 体外受精  | 新鲜周期 | 1    | 短效长方案 | 达必佳 (短效)  | 1200        | 12          | 750         | 6           |
| 体外受精  | 新鲜周期 | 1    | 短效长方案 | 达必佳 (短效)  | 1500        | 11          | 600         | 5           |
| 体外受精  | 新鲜周期 | 1    | 短效长方案 | 达必佳 (短效)  | 1400        | 7           | 3300        | 8           |
| 体外受精  | 新鲜周期 | 1    | 短效长方案 | 达菲林(短效),  | 1050        | 9           | 300         | 3           |
| 体外受精  | 新鲜周期 | 1    | 短效长方案 | 达菲林(短效),  | 1050        | 7           | 450         | 3           |
| 体外受精  | 新鲜周期 | 1    | 短效长方案 | 达必佳 (短效)  | 2300        | 13          | 975         | 7           |
| 体外受精  | 新鲜周期 | 2    | 短效长方案 | 达菲林(短效),  | 1200        | 8           | 3675        | 14          |
| 体外受精  | 新鲜周期 | 3    | 短效长方案 | 达必佳 (短效)  | 1700        | 10          | 900         | 5           |
| 体外受精  | 新鲜周期 | 1    | 短效长方案 | 达必佳 (短效)  | 600         | 8           | 1012.5      | 8           |
| 体外受精  | 新鲜周期 | 1    | 短效长方案 | 达必佳 (短效)  | 600         | 8           | 1275        | 7           |
| 体外受精  | 新鲜周期 | 1    | 短效长方案 | 达菲林(短效),  | 1600        | 8           | 900         | 4           |
| 体外受精  | 新鲜周期 | 1    | 短效长方案 | 达必佳 (短效)  | 2200        | 11          | 825         | 11          |
| 体外受精  | 新鲜周期 | 1    | 短效长方案 | 达必佳 (短效)  | 2000        | 10          | 1500        | 10          |
| 体外受精  | 新鲜周期 | 1    | 短效长方案 | 达菲林(短效),  | 1750        | 10          | 825         | 7           |
| 体外受精  | 新鲜周期 | 2    | 短效长方案 | 达菲林(短效),  | 850         | 9           | 375         | 3           |
| 体外受精  | 新鲜周期 | 1    | 短效长方案 | 达菲林(短效),  | 825         | 11          | 825         | 13          |
| 体外受精  | 新鲜周期 | 1    | 短效长方案 | 达菲林(短效),  | 1050        | 7           | 1350        | 6           |
| 体外受精  | 新鲜周期 | 2    | 短效长方案 | 达菲林(短效),  | 1600        | 8           | 2325        | 8           |
| 体外受精  | 新鲜周期 | 1    | 短效长方案 | 达菲林(短效),  | 1200        | 8           | 150         | 2           |
| 体外受精  | 新鲜周期 | 1    | 短效长方案 | 达必佳 (短效)  | 800         | 8           | 1275        | 7           |
| 体外受精  | 新鲜周期 | 1    | 短效长方案 | 达菲林(短效),  | 700         | 7           | 1350        | 6           |
| 体外受精  | 新鲜周期 | 3    | 短效长方案 | 达菲林(短效),  | 1400        | 10          | 600         | 4           |
| 体外受精  | 新鲜周期 | 1    | 短效长方案 | 达菲林(短效),  | 1800        | 12          | 825         | 4           |
| 体外受精  | 新鲜周期 | 1    | 短效长方案 | 达菲林(短效),  | 1200        | 9           | 1050        | 6           |
| 体外受精  | 新鲜周期 | 1    | 短效长方案 | 达菲林(短效),  | 1200        | 9           | 1350        | 8           |
| 体外受精  | 新鲜周期 | 2    | 短效长方案 | 达菲林(短效),  | 900         | 6           | 300         | 2           |
| 体外受精  | 新鲜周期 | 1    | 短效长方案 | 达菲林(短效),  | 1600        | 8           | 450         | 2           |
| 体外受精  | 新鲜周期 | 1    | 短效长方案 | 达必佳 (短效)  | 2925        | 17          | 5850        | 18          |
| 体外受精  | 新鲜周期 | 1    | 短效长方案 | 达菲林(短效),  | 1800        | 12          | 2400        | 8           |
| 体外受精  | 新鲜周期 | 1    | 短效长方案 | 达必佳 (短效)  | 1500        | 10          | 375         | 10          |

|      |      |   |       |          |      |    |        |    |
|------|------|---|-------|----------|------|----|--------|----|
| 体外受精 | 新鲜周期 | 1 | 短效长方案 | 达菲林(短效), | 1050 | 8  | 750    | 6  |
| 体外受精 | 新鲜周期 | 1 | 短效长方案 | 达菲林(短效), | 1500 | 10 | 187.5  | 1  |
| 体外受精 | 新鲜周期 | 2 | 短效长方案 | 达菲林(短效), | 1350 | 10 | 600    | 5  |
| 体外受精 | 新鲜周期 | 1 | 短效长方案 | 达菲林(短效), | 1700 | 11 | 1200   | 7  |
| 体外受精 | 新鲜周期 | 1 | 短效长方案 | 达菲林(短效), | 1200 | 8  | 375    | 3  |
| 体外受精 | 新鲜周期 | 1 | 短效长方案 | 达菲林(短效), | 1200 | 8  | 300    | 3  |
| 体外受精 | 新鲜周期 | 1 | 短效长方案 | 达菲林(短效), | 1950 | 11 | 1200   | 5  |
| 体外受精 | 新鲜周期 | 1 | 短效长方案 | 达必佳 (短效) | 1350 | 11 | 975    | 7  |
| 体外受精 | 新鲜周期 | 2 | 短效长方案 | 达必佳 (短效) | 1425 | 9  | 1350   | 7  |
| 体外受精 | 新鲜周期 | 1 | 短效长方案 | 达菲林(短效), | 1350 | 9  | 4950   | 12 |
| 体外受精 | 新鲜周期 | 1 | 短效长方案 | 达菲林(短效), | 1200 | 9  | 825    | 5  |
| 体外受精 | 新鲜周期 | 1 | 短效长方案 | 达菲林(短效), | 1200 | 9  | 300    | 3  |
| 体外受精 | 新鲜周期 | 1 | 短效长方案 | 达菲林(短效), | 1950 | 12 | 150    | 2  |
| 体外受精 | 新鲜周期 | 1 | 短效长方案 | 达菲林(短效), | 1425 | 11 | 900    | 7  |
| 体外受精 | 新鲜周期 | 2 | 短效长方案 | 达菲林(短效), | 1350 | 10 | 1200   | 8  |
| 体外受精 | 新鲜周期 | 1 | 短效长方案 | 达菲林(短效), | 1800 | 9  | 150    | 1  |
| 体外受精 | 新鲜周期 | 1 | 短效长方案 | 达菲林(短效), | 1900 | 11 | 450    | 3  |
| 体外受精 | 新鲜周期 | 3 | 短效长方案 | 达菲林(短效), | 1600 | 9  | 1200   | 5  |
| 体外受精 | 新鲜周期 | 1 | 短效长方案 | 达菲林(短效), | 1000 | 5  | 900    | 4  |
| 体外受精 | 新鲜周期 | 1 | 短效长方案 | 达菲林(短效), | 1200 | 8  | 600    | 8  |
| 体外受精 | 新鲜周期 | 1 | 短效长方案 | 达菲林(短效), | 1250 | 9  | 375    | 3  |
| 体外受精 | 新鲜周期 | 1 | 短效长方案 | 达菲林(短效), | 1650 | 11 | 900    | 7  |
| 体外受精 | 新鲜周期 | 1 | 短效长方案 | 达菲林(短效), | 1350 | 10 | 600    | 6  |
| 体外受精 | 新鲜周期 | 1 | 短效长方案 | 达菲林(短效), | 1250 | 9  | 225    | 3  |
| 体外受精 | 新鲜周期 | 1 | 短效长方案 | 达菲林(短效), | 1200 | 9  | 600    | 5  |
| 体外受精 | 新鲜周期 | 2 | 短效长方案 | 达菲林(短效), | 1500 | 11 | 150    | 2  |
| 体外受精 | 新鲜周期 | 1 | 短效长方案 | 达必佳 (短效) | 1800 | 9  | 300    | 2  |
| 体外受精 | 新鲜周期 | 1 | 短效长方案 | 达必佳 (短效) | 1200 | 8  | 600    | 5  |
| 体外受精 | 新鲜周期 | 1 | 短效长方案 | 达菲林(短效), | 1600 | 9  | 1125   | 6  |
| 体外受精 | 新鲜周期 | 1 | 短效长方案 | 达菲林(短效), | 1200 | 8  | 675    | 5  |
| 体外受精 | 新鲜周期 | 1 | 短效长方案 | 达必佳 (短效) | 0    | 0  | 1800   | 7  |
| 体外受精 | 新鲜周期 | 2 | 短效长方案 | 达菲林(短效), | 1350 | 11 | 1087.5 | 14 |
| 体外受精 | 新鲜周期 | 1 | 短效长方案 | 达菲林(长效), | 600  | 6  | 1650   | 14 |
| 体外受精 | 新鲜周期 | 1 | 短效长方案 | 达必佳 (短效) | 1200 | 8  | 150    | 1  |
| 体外受精 | 新鲜周期 | 2 | 短效长方案 | 达菲林(短效), | 1400 | 7  | 225    | 2  |
| 体外受精 | 新鲜周期 | 1 | 短效长方案 | 达菲林(短效), | 1650 | 11 | 450    | 3  |
| 体外受精 | 新鲜周期 | 1 | 短效长方案 | 达菲林(短效), | 1875 | 11 | 1200   | 6  |
| 体外受精 | 新鲜周期 | 1 | 短效长方案 | 达必佳 (短效) | 2100 | 10 | 1050   | 5  |
| 体外受精 | 新鲜周期 | 5 | 短效长方案 | 达必佳 (短效) | 675  | 9  | 2025   | 9  |
| 体外受精 | 新鲜周期 | 1 | 短效长方案 | 达菲林(短效), | 1350 | 10 | 1275   | 9  |
| 体外受精 | 新鲜周期 | 1 | 短效长方案 | 达必佳 (短效) | 1350 | 10 | 150    | 2  |
| 体外受精 | 新鲜周期 | 1 | 短效长方案 | 达必佳 (短效) | 975  | 7  | 75     | 1  |
| 体外受精 | 新鲜周期 | 1 | 短效长方案 | 达必佳 (短效) | 1350 | 10 | 150    | 2  |
| 体外受精 | 新鲜周期 | 1 | 短效长方案 | 达菲林(短效), | 1350 | 10 | 300    | 3  |
| 体外受精 | 新鲜周期 | 2 | 短效长方案 | 达菲林(短效), | 2000 | 11 | 675    | 5  |
| 体外受精 | 新鲜周期 | 1 | 短效长方案 | 达必佳 (短效) | 1200 | 9  | 1050   | 6  |
| 体外受精 | 新鲜周期 | 1 | 短效长方案 | 达必佳 (短效) | 1575 | 11 | 75     | 1  |
| 体外受精 | 新鲜周期 | 1 | 短效长方案 | 达菲林(短效), | 1500 | 10 | 150    | 1  |
| 体外受精 | 新鲜周期 | 3 | 短效长方案 | 达菲林(短效), | 1200 | 9  | 3150   | 11 |
| 体外受精 | 新鲜周期 | 2 | 短效长方案 | 达菲林(短效), | 1800 | 10 | 1800   | 9  |

|      |      |   |       |          |      |    |        |    |
|------|------|---|-------|----------|------|----|--------|----|
| 体外受精 | 新鲜周期 | 1 | 短效长方案 | 达必佳(短效)  | 1200 | 9  | 450    | 4  |
| 体外受精 | 新鲜周期 | 1 | 短效长方案 | 达必佳(短效)  | 1200 | 8  | 600    | 4  |
| 体外受精 | 新鲜周期 | 1 | 短效长方案 | 达菲林(短效), | 1200 | 12 | 450    | 6  |
| 体外受精 | 新鲜周期 | 1 | 短效长方案 | 达菲林(短效), | 2025 | 10 | 900    | 6  |
| 体外受精 | 新鲜周期 | 2 | 短效长方案 | 达菲林(长效), | 1125 | 8  | 375    | 3  |
| 体外受精 | 新鲜周期 | 1 | 短效长方案 | 达必佳(短效)  | 1125 | 11 | 3225   | 10 |
| 体外受精 | 新鲜周期 | 1 | 短效长方案 | 达必佳(短效)  | 1200 | 9  | 600    | 5  |
| 体外受精 | 新鲜周期 | 1 | 短效长方案 | 达必佳(短效)  | 1850 | 10 | 450    | 4  |
| 体外受精 | 新鲜周期 | 1 | 短效长方案 | 达必佳(短效)  | 1425 | 12 | 1575   | 8  |
| 体外受精 | 新鲜周期 | 1 | 短效长方案 | 达必佳(短效)  | 1200 | 9  | 450    | 4  |
| 体外受精 | 新鲜周期 | 1 | 短效长方案 | 达必佳(短效)  | 1875 | 9  | 375    | 3  |
| 体外受精 | 新鲜周期 | 1 | 短效长方案 | 达必佳(短效)  | 825  | 8  | 600    | 5  |
| 体外受精 | 新鲜周期 | 1 | 短效长方案 | 达必佳(短效)  | 1050 | 8  | 3900   | 10 |
| 体外受精 | 新鲜周期 | 1 | 短效长方案 | 达菲林(长效), | 1650 | 14 | 750    | 6  |
| 体外受精 | 新鲜周期 | 2 | 短效长方案 | 达菲林(短效), | 1200 | 7  | 1800   | 6  |
| 体外受精 | 新鲜周期 | 1 | 短效长方案 | 达必佳(短效)  | 1275 | 10 | 900    | 5  |
| 体外受精 | 新鲜周期 | 1 | 短效长方案 | 达必佳(短效)  | 600  | 8  | 1987.5 | 15 |
| 体外受精 | 新鲜周期 | 1 | 短效长方案 | 达必佳(短效)  | 1950 | 10 | 525    | 4  |
| 体外受精 | 新鲜周期 | 1 | 短效长方案 | 达菲林(短效), | 850  | 9  | 600    | 5  |
| 体外受精 | 新鲜周期 | 1 | 短效长方案 | 达菲林(短效), | 1200 | 9  | 150    | 2  |
| 体外受精 | 新鲜周期 | 1 | 短效长方案 | 达必佳(短效)  | 1350 | 11 | 600    | 6  |
| 体外受精 | 新鲜周期 | 1 | 短效长方案 | 达必佳(短效)  | 1275 | 10 | 525    | 5  |
| 体外受精 | 新鲜周期 | 1 | 短效长方案 | 达必佳(短效)  | 2000 | 12 | 450    | 4  |
| 体外受精 | 新鲜周期 | 1 | 短效长方案 | 达必佳(短效)  | 1200 | 9  | 150    | 2  |
| 体外受精 | 新鲜周期 | 2 | 短效长方案 | 达必佳(短效)  | 1800 | 10 | 862.5  | 5  |
| 体外受精 | 新鲜周期 | 1 | 短效长方案 | 达必佳(短效)  | 1000 | 10 | 1200   | 7  |
| 体外受精 | 新鲜周期 | 1 | 短效长方案 | 达必佳(短效)  | 900  | 9  | 112.5  | 2  |
| 体外受精 | 新鲜周期 | 1 | 短效长方案 | 达必佳(短效)  | 1200 | 12 | 975    | 7  |
| 体外受精 | 新鲜周期 | 3 | 短效长方案 | 达必佳(短效)  | 1200 | 9  | 1725   | 13 |
| 体外受精 | 新鲜周期 | 1 | 短效长方案 | 达必佳(短效)  | 1200 | 9  | 600    | 5  |
| 体外受精 | 新鲜周期 | 1 | 短效长方案 | 达菲林(短效), | 1350 | 10 | 2325   | 8  |
| 体外受精 | 新鲜周期 | 2 | 短效长方案 | 达必佳(短效)  | 1350 | 9  | 675    | 9  |
| 体外受精 | 新鲜周期 | 1 | 短效长方案 | 达必佳(短效)  | 1275 | 10 | 1650   | 13 |
| 体外受精 | 新鲜周期 | 2 | 短效长方案 | 达菲林(短效), | 1200 | 8  | 300    | 2  |
| 体外受精 | 新鲜周期 | 1 | 短效长方案 | 达菲林(短效), | 1200 | 9  | 300    | 3  |
| 体外受精 | 新鲜周期 | 1 | 短效长方案 | 达必佳(短效)  | 1050 | 8  | 525    | 5  |
| 体外受精 | 新鲜周期 | 1 | 短效长方案 | 达必佳(短效)  | 1425 | 11 | 225    | 3  |
| 体外受精 | 新鲜周期 | 1 | 短效长方案 | 达必佳(短效)  | 1950 | 10 | 975    | 5  |
| 体外受精 | 新鲜周期 | 1 | 短效长方案 | 达必佳(短效)  | 900  | 9  | 1875   | 7  |
| 体外受精 | 新鲜周期 | 3 | 短效长方案 | 达菲林(短效), | 1425 | 11 | 825    | 6  |
| 体外受精 | 新鲜周期 | 2 | 短效长方案 | 达菲林(短效), | 1800 | 10 | 525    | 3  |
| 体外受精 | 新鲜周期 | 1 | 短效长方案 | 达菲林(短效), | 1500 | 7  | 0      | 0  |
| 体外受精 | 新鲜周期 | 3 | 短效长方案 | 达必佳(短效)  | 1200 | 9  | 1800   | 11 |
| 体外受精 | 新鲜周期 | 1 | 短效长方案 | 达必佳(短效)  | 1200 | 8  | 450    | 4  |
| 体外受精 | 新鲜周期 | 1 | 短效长方案 | 达必佳(短效)  | 1500 | 11 | 300    | 3  |
| 体外受精 | 新鲜周期 | 1 | 短效长方案 | 达菲林(短效), | 1050 | 7  | 1350   | 7  |
| 体外受精 | 新鲜周期 | 1 | 短效长方案 | 达必佳(短效)  | 1200 | 8  | 675    | 5  |
| 体外受精 | 新鲜周期 | 2 | 短效长方案 | 达必佳(短效)  | 1650 | 11 | 1950   | 6  |
| 体外受精 | 新鲜周期 | 2 | 短效长方案 | 达必佳(短效)  | 1200 | 10 | 150    | 2  |
| 体外受精 | 新鲜周期 | 1 | 短效长方案 | 达必佳(短效)  | 1500 | 11 | 300    | 3  |

|      |      |   |       |          |        |    |        |    |
|------|------|---|-------|----------|--------|----|--------|----|
| 体外受精 | 新鲜周期 | 2 | 短效长方案 | 达菲林(短效), | 1200   | 12 | 1012.5 | 14 |
| 体外受精 | 新鲜周期 | 1 | 短效长方案 | 达必佳(短效   | 1350   | 10 | 150    | 2  |
| 体外受精 | 新鲜周期 | 1 | 短效长方案 | 达必佳(短效   | 1237.5 | 12 | 1425   | 16 |
| 体外受精 | 新鲜周期 | 1 | 短效长方案 | 达菲林(短效), | 1050   | 7  | 3150   | 8  |
| 体外受精 | 新鲜周期 | 1 | 短效长方案 | 达必佳(短效   | 1200   | 9  | 1125   | 7  |
| 体外受精 | 新鲜周期 | 2 | 短效长方案 | 达必佳(短效   | 1350   | 10 | 300    | 3  |
| 体外受精 | 新鲜周期 | 1 | 短效长方案 | 达必佳(短效   | 850    | 9  | 1462.5 | 12 |
| 体外受精 | 新鲜周期 | 1 | 短效长方案 | 达必佳(短效   | 700    | 7  | 637.5  | 10 |
| 体外受精 | 新鲜周期 | 1 | 短效长方案 | 达必佳(短效   | 1350   | 9  | 525    | 3  |
| 体外受精 | 新鲜周期 | 1 | 短效长方案 | 达必佳(短效   | 1800   | 10 | 450    | 3  |
| 体外受精 | 新鲜周期 | 1 | 短效长方案 | 达必佳(短效   | 1200   | 9  | 225    | 3  |
| 体外受精 | 新鲜周期 | 1 | 短效长方案 | 达必佳(短效   | 1350   | 9  | 0      | 0  |
| 体外受精 | 新鲜周期 | 1 | 短效长方案 | 达菲林(短效), | 1650   | 11 | 825    | 11 |
| 体外受精 | 新鲜周期 | 1 | 短效长方案 | 达必佳(短效   | 1200   | 9  | 300    | 3  |
| 体外受精 | 新鲜周期 | 1 | 短效长方案 | 达必佳(短效   | 1600   | 9  | 525    | 3  |
| 体外受精 | 新鲜周期 | 1 | 短效长方案 | 达必佳(短效   | 1200   | 6  | 1350   | 6  |
| 体外受精 | 新鲜周期 | 1 | 短效长方案 | 达菲林(短效), | 1125   | 8  | 450    | 3  |
| 体外受精 | 新鲜周期 | 1 | 短效长方案 | 达菲林(短效), | 1275   | 10 | 225    | 3  |
| 体外受精 | 新鲜周期 | 1 | 短效长方案 | 达菲林(短效), | 1700   | 11 | 1200   | 7  |
| 体外受精 | 新鲜周期 | 1 | 短效长方案 | 达必佳(短效   | 1200   | 9  | 750    | 6  |
| 体外受精 | 新鲜周期 | 1 | 短效长方案 | 达必佳(短效   | 1200   | 8  | 1725   | 6  |
| 体外受精 | 新鲜周期 | 1 | 短效长方案 | 达必佳(短效   | 1200   | 6  | 975    | 5  |
| 体外受精 | 新鲜周期 | 1 | 短效长方案 | 达必佳(短效   | 1200   | 10 | 300    | 5  |
| 体外受精 | 新鲜周期 | 1 | 短效长方案 | 达必佳(短效   | 1275   | 9  | 225    | 2  |
| 体外受精 | 新鲜周期 | 1 | 短效长方案 | 达必佳(短效   | 800    | 8  | 750    | 9  |
| 体外受精 | 新鲜周期 | 1 | 短效长方案 | 达菲林(短效), | 1200   | 9  | 450    | 4  |
| 体外受精 | 新鲜周期 | 1 | 短效长方案 | 达必佳(短效   | 2000   | 10 | 450    | 4  |
| 体外受精 | 新鲜周期 | 2 | 短效长方案 | 达必佳(短效   | 750    | 8  | 525    | 9  |
| 体外受精 | 新鲜周期 | 1 | 短效长方案 | 达必佳(短效   | 2000   | 10 | 1650   | 7  |
| 体外受精 | 新鲜周期 | 1 | 短效长方案 | 达必佳(短效   | 1350   | 10 | 4595   | 9  |
| 体外受精 | 新鲜周期 | 1 | 短效长方案 | 达必佳(短效   | 1275   | 10 | 525    | 4  |
| 体外受精 | 新鲜周期 | 1 | 短效长方案 | 达菲林(短效), | 2700   | 12 | 1425   | 12 |
| 体外受精 | 新鲜周期 | 2 | 短效长方案 | 达菲林(短效), | 1050   | 7  | 3450   | 8  |
| 体外受精 | 新鲜周期 | 1 | 短效长方案 | 达菲林(短效), | 1800   | 11 | 600    | 4  |
| 体外受精 | 新鲜周期 | 1 | 短效长方案 | 达菲林(短效), | 1700   | 10 | 675    | 4  |
| 体外受精 | 新鲜周期 | 3 | 短效长方案 | 达菲林(短效), | 750    | 5  | 0      | 0  |
| 体外受精 | 新鲜周期 | 1 | 短效长方案 | 达必佳(短效   | 1200   | 8  | 450    | 3  |
| 体外受精 | 新鲜周期 | 1 | 短效长方案 | 达菲林(短效), | 1800   | 12 | 0      | 0  |
| 体外受精 | 新鲜周期 | 1 | 短效长方案 | 达必佳(短效   | 1800   | 10 | 900    | 5  |
| 体外受精 | 新鲜周期 | 1 | 短效长方案 | 达必佳(短效   | 1350   | 10 | 2400   | 11 |
| 体外受精 | 新鲜周期 | 2 | 短效长方案 | 达必佳(短效   | 1350   | 10 | 2325   | 10 |
| 体外受精 | 新鲜周期 | 1 | 短效长方案 | 达必佳(短效   | 1500   | 10 | 2100   | 10 |
| 体外受精 | 新鲜周期 | 1 | 短效长方案 | 达必佳(短效   | 1500   | 11 | 1050   | 5  |
| 体外受精 | 新鲜周期 | 1 | 短效长方案 | 达必佳(短效   | 2000   | 10 | 450    | 2  |
| 体外受精 | 新鲜周期 | 1 | 短效长方案 | 达必佳(短效   | 937.5  | 9  | 675    | 7  |
| 体外受精 | 新鲜周期 | 1 | 短效长方案 | 达必佳(短效   | 1950   | 11 | 525    | 3  |
| 体外受精 | 新鲜周期 | 2 | 短效长方案 | 达必佳(短效   | 1200   | 9  | 450    | 4  |
| 体外受精 | 新鲜周期 | 1 | 短效长方案 | 达必佳(短效   | 1350   | 10 | 300    | 3  |
| 体外受精 | 新鲜周期 | 1 | 短效长方案 | 达必佳(短效   | 1800   | 10 | 4200   | 10 |
| 体外受精 | 新鲜周期 | 1 | 短效长方案 | 达必佳(短效   | 1275   | 10 | 1725   | 12 |

|      |      |   |       |          |        |    |        |    |
|------|------|---|-------|----------|--------|----|--------|----|
| 体外受精 | 新鲜周期 | 2 | 短效长方案 | 达必佳(短效)  | 900    | 7  | 3412.5 | 14 |
| 体外受精 | 新鲜周期 | 1 | 短效长方案 | 达必佳(短效)  | 1275   | 10 | 450    | 6  |
| 体外受精 | 新鲜周期 | 3 | 短效长方案 | 达必佳(短效)  | 1800   | 9  | 825    | 10 |
| 体外受精 | 新鲜周期 | 2 | 短效长方案 | 达必佳(短效)  | 1350   | 11 | 1350   | 10 |
| 体外受精 | 新鲜周期 | 1 | 短效长方案 | 达必佳(短效)  | 1500   | 11 | 300    | 3  |
| 体外受精 | 新鲜周期 | 2 | 短效长方案 | 达必佳(短效)  | 1050   | 7  | 300    | 2  |
| 体外受精 | 新鲜周期 | 1 | 短效长方案 | 达必佳(短效)  | 1800   | 10 | 450    | 3  |
| 体外受精 | 新鲜周期 | 1 | 短效长方案 | 达必佳(短效)  | 700    | 7  | 1275   | 10 |
| 体外受精 | 新鲜周期 | 1 | 短效长方案 | 达必佳(短效)  | 1200   | 8  | 1500   | 8  |
| 体外受精 | 新鲜周期 | 1 | 短效长方案 | 达必佳(短效)  | 1200   | 6  | 1050   | 6  |
| 体外受精 | 新鲜周期 | 1 | 短效长方案 | 达必佳(短效)  | 1300   | 9  | 2100   | 9  |
| 体外受精 | 新鲜周期 | 1 | 短效长方案 | 达必佳(短效)  | 1875   | 13 | 3375   | 11 |
| 体外受精 | 新鲜周期 | 2 | 短效长方案 | 达菲林(短效), | 2000   | 10 | 1500   | 10 |
| 体外受精 | 新鲜周期 | 1 | 短效长方案 | 达菲林(短效), | 1050   | 7  | 2062.5 | 9  |
| 体外受精 | 新鲜周期 | 1 | 短效长方案 | 达必佳(短效)  | 1350   | 9  | 600    | 10 |
| 体外受精 | 新鲜周期 | 2 | 短效长方案 | 达必佳(短效)  | 1350   | 10 | 825    | 7  |
| 体外受精 | 新鲜周期 | 1 | 短效长方案 | 达必佳(短效)  | 1350   | 6  | 1350   | 9  |
| 体外受精 | 新鲜周期 | 1 | 短效长方案 | 达必佳(短效)  | 1350   | 6  | 2550   | 6  |
| 体外受精 | 新鲜周期 | 2 | 短效长方案 | 达必佳(短效)  | 1800   | 9  | 75     | 1  |
| 体外受精 | 新鲜周期 | 1 | 短效长方案 | 达必佳(短效)  | 1425   | 10 | 225    | 2  |
| 体外受精 | 新鲜周期 | 2 | 短效长方案 | 达菲林(短效), | 1425   | 11 | 1125   | 7  |
| 体外受精 | 新鲜周期 | 2 | 短效长方案 | 达必佳(短效)  | 1200   | 9  | 150    | 2  |
| 体外受精 | 新鲜周期 | 2 | 短效长方案 | 达必佳(短效)  | 1800   | 9  | 975    | 10 |
| 体外受精 | 新鲜周期 | 1 | 短效长方案 | 达必佳(短效)  | 1350   | 9  | 300    | 2  |
| 体外受精 | 新鲜周期 | 1 | 短效长方案 | 达必佳(短效)  | 1350   | 10 | 1575   | 7  |
| 体外受精 | 新鲜周期 | 2 | 短效长方案 | 达必佳(短效)  | 1800   | 9  | 150    | 1  |
| 体外受精 | 新鲜周期 | 2 | 短效长方案 | 达必佳(短效)  | 1350   | 10 | 1200   | 8  |
| 体外受精 | 新鲜周期 | 1 | 短效长方案 | 达必佳(短效)  | 1200   | 8  | 825    | 10 |
| 体外受精 | 新鲜周期 | 1 | 短效长方案 | 达必佳(短效)  | 1200   | 12 | 1725   | 10 |
| 体外受精 | 新鲜周期 | 1 | 短效长方案 | 达必佳(短效)  | 1800   | 12 | 600    | 7  |
| 体外受精 | 新鲜周期 | 1 | 短效长方案 | 达必佳(短效)  | 1200   | 8  | 6675   | 18 |
| 体外受精 | 新鲜周期 | 2 | 短效长方案 | 达必佳(短效)  | 1550   | 10 | 150    | 2  |
| 体外受精 | 新鲜周期 | 1 | 短效长方案 | 达必佳(短效)  | 1950   | 13 | 4800   | 20 |
| 体外受精 | 新鲜周期 | 1 | 短效长方案 | 达必佳(短效)  | 1650   | 11 | 1425   | 14 |
| 体外受精 | 新鲜周期 | 1 | 短效长方案 | 达必佳(短效)  | 1237.5 | 7  | 2025   | 12 |
| 体外受精 | 新鲜周期 | 1 | 短效长方案 | 达必佳(短效)  | 1150   | 7  | 2100   | 5  |
| 体外受精 | 新鲜周期 | 1 | 短效长方案 | 达必佳(短效)  | 1275   | 10 | 1125   | 6  |
| 体外受精 | 新鲜周期 | 2 | 短效长方案 | 达菲林(短效), | 1200   | 12 | 150    | 3  |
| 体外受精 | 新鲜周期 | 1 | 短效长方案 | 达必佳(短效)  | 1200   | 8  | 1500   | 7  |
| 体外受精 | 新鲜周期 | 1 | 短效长方案 | 达必佳(短效)  | 800    | 8  | 1275   | 11 |
| 体外受精 | 新鲜周期 | 1 | 短效长方案 | 达必佳(短效)  | 1237.5 | 7  | 750    | 4  |
| 体外受精 | 新鲜周期 | 1 | 短效长方案 | 达必佳(短效)  | 1050   | 7  | 3525   | 12 |
| 体外受精 | 新鲜周期 | 1 | 短效长方案 | 达必佳(短效)  | 1800   | 10 | 525    | 3  |
| 体外受精 | 新鲜周期 | 1 | 短效长方案 | 达菲林(短效), | 1200   | 9  | 150    | 2  |
| 体外受精 | 新鲜周期 | 1 | 短效长方案 | 达必佳(短效)  | 1200   | 9  | 300    | 3  |
| 体外受精 | 新鲜周期 | 1 | 短效长方案 | 达必佳(短效)  | 1500   | 10 | 600    | 4  |
| 体外受精 | 新鲜周期 | 1 | 短效长方案 | 达必佳(短效)  | 1200   | 9  | 300    | 3  |
| 体外受精 | 新鲜周期 | 1 | 短效长方案 | 达必佳(短效)  | 1650   | 13 | 3075   | 10 |
| 体外受精 | 新鲜周期 | 1 | 短效长方案 | 达必佳(短效)  | 650    | 7  | 450    | 4  |
| 体外受精 | 新鲜周期 | 1 | 短效长方案 | 达必佳(短效)  | 1350   | 10 | 825    | 6  |

|      |      |   |       |          |      |    |        |    |
|------|------|---|-------|----------|------|----|--------|----|
| 体外受精 | 新鲜周期 | 1 | 短效长方案 | 达必佳(短效)  | 1500 | 12 | 3675   | 12 |
| 体外受精 | 新鲜周期 | 1 | 短效长方案 | 达必佳(短效)  | 1425 | 11 | 675    | 6  |
| 体外受精 | 新鲜周期 | 1 | 短效长方案 | 达必佳(短效)  | 1800 | 12 | 1050   | 8  |
| 体外受精 | 新鲜周期 | 2 | 短效长方案 | 达菲林(短效), | 1200 | 8  | 1500   | 7  |
| 体外受精 | 卵子冷冻 | 1 | 短效长方案 | 达必佳(短效)  | 1200 | 8  | 1275   | 11 |
| 体外受精 | 新鲜周期 | 1 | 短效长方案 | 达必佳(短效)  | 1200 | 8  | 3150   | 10 |
| 体外受精 | 新鲜周期 | 1 | 短效长方案 | 达必佳(短效)  | 1800 | 9  | 825    | 10 |
| 体外受精 | 新鲜周期 | 1 | 短效长方案 | 达必佳(短效)  | 2400 | 12 | 1050   | 7  |
| 体外受精 | 新鲜周期 | 1 | 短效长方案 | 达必佳(短效)  | 1200 | 9  | 825    | 9  |
| 体外受精 | 新鲜周期 | 1 | 短效长方案 | 达必佳(短效)  | 2400 | 12 | 1575   | 13 |
| 体外受精 | 新鲜周期 | 1 | 短效长方案 | 达必佳(短效)  | 2400 | 12 | 2137.5 | 15 |
| 体外受精 | 新鲜周期 | 1 | 短效长方案 | 达必佳(短效)  | 1350 | 14 | 2062.5 | 15 |
| 体外受精 | 新鲜周期 | 1 | 短效长方案 | 达必佳(短效)  | 1350 | 9  | 637.5  | 10 |
| 体外受精 | 新鲜周期 | 1 | 短效长方案 | 达必佳(短效)  | 1500 | 11 | 300    | 3  |
| 体外受精 | 新鲜周期 | 2 | 短效长方案 | 达必佳(短效)  | 1575 | 12 | 900    | 7  |
| 体外受精 | 新鲜周期 | 1 | 短效长方案 | 达必佳(短效)  | 1200 | 9  | 600    | 5  |
| 体外受精 | 新鲜周期 | 1 | 短效长方案 | 达必佳(短效)  | 1650 | 11 | 450    | 6  |
| 体外受精 | 新鲜周期 | 1 | 短效长方案 | 达必佳(短效)  | 1200 | 6  | 600    | 2  |
| 体外受精 | 新鲜周期 | 2 | 短效长方案 | 达菲林(短效), | 1900 | 11 | 450    | 3  |
| 体外受精 | 新鲜周期 | 1 | 短效长方案 | 达必佳(短效)  | 1350 | 10 | 3975   | 12 |
| 体外受精 | 新鲜周期 | 1 | 短效长方案 | 达必佳(短效)  | 1200 | 8  | 750    | 10 |
| 体外受精 | 新鲜周期 | 1 | 短效长方案 | 达必佳(短效)  | 1300 | 13 | 750    | 8  |
| 体外受精 | 新鲜周期 | 1 | 短效长方案 | 达必佳(短效)  | 1600 | 9  | 750    | 4  |
| 体外受精 | 新鲜周期 | 1 | 短效长方案 | 达必佳(短效)  | 1425 | 11 | 900    | 7  |
| 体外受精 | 新鲜周期 | 1 | 短效长方案 | 达必佳(短效)  | 1250 | 7  | 3300   | 11 |
| 体外受精 | 新鲜周期 | 1 | 短效长方案 | 达必佳(短效)  | 1200 | 9  | 675    | 6  |
| 体外受精 | 新鲜周期 | 1 | 短效长方案 | 达必佳(短效)  | 1350 | 11 | 750    | 6  |
| 体外受精 | 新鲜周期 | 1 | 短效长方案 | 达必佳(短效)  | 700  | 7  | 600    | 4  |
| 体外受精 | 新鲜周期 | 1 | 短效长方案 | 达必佳(短效)  | 1200 | 8  | 300    | 2  |
| 体外受精 | 新鲜周期 | 1 | 短效长方案 | 达必佳(短效)  | 1800 | 10 | 450    | 3  |
| 体外受精 | 新鲜周期 | 1 | 短效长方案 | 达必佳(短效)  | 1200 | 8  | 750    | 4  |
| 体外受精 | 新鲜周期 | 1 | 短效长方案 | 达必佳(短效)  | 1125 | 11 | 712.5  | 8  |
| 体外受精 | 新鲜周期 | 1 | 短效长方案 | 达必佳(短效)  | 1200 | 8  | 1005   | 11 |
| 体外受精 | 新鲜周期 | 1 | 短效长方案 | 达必佳(短效)  | 1800 | 10 | 900    | 4  |
| 体外受精 | 新鲜周期 | 1 | 短效长方案 | 达必佳(短效)  | 1200 | 9  | 975    | 7  |
| 体外受精 | 新鲜周期 | 1 | 短效长方案 | 达必佳(短效)  | 2100 | 10 | 525    | 3  |
| 体外受精 | 新鲜周期 | 1 | 短效长方案 | 达必佳(短效)  | 450  | 3  | 1650   | 10 |
| 体外受精 | 新鲜周期 | 1 | 短效长方案 | 达必佳(短效)  | 1200 | 8  | 450    | 3  |
| 体外受精 | 新鲜周期 | 1 | 短效长方案 | 达必佳(短效)  | 1200 | 9  | 675    | 6  |
| 体外受精 | 新鲜周期 | 1 | 短效长方案 | 达必佳(短效)  | 1200 | 9  | 450    | 4  |
| 体外受精 | 新鲜周期 | 1 | 短效长方案 | 达必佳(短效)  | 1125 | 9  | 525    | 5  |
| 体外受精 | 新鲜周期 | 1 | 短效长方案 | 达菲林(短效), | 1200 | 10 | 825    | 8  |
| 体外受精 | 新鲜周期 | 1 | 短效长方案 | 达必佳(短效)  | 1750 | 9  | 1125   | 7  |
| 体外受精 | 新鲜周期 | 1 | 短效长方案 | 达必佳(短效)  | 1200 | 8  | 300    | 2  |
| 体外受精 | 新鲜周期 | 1 | 短效长方案 | 达必佳(短效)  | 1400 | 10 | 600    | 4  |
| 体外受精 | 新鲜周期 | 1 | 短效长方案 | 达必佳(短效)  | 1800 | 12 | 900    | 12 |
| 体外受精 | 新鲜周期 | 1 | 短效长方案 | 达必佳(短效)  | 1100 | 7  | 2400   | 11 |
| 体外受精 | 新鲜周期 | 1 | 短效长方案 | 达必佳(短效)  | 1200 | 9  | 900    | 6  |
| 体外受精 | 新鲜周期 | 1 | 短效长方案 | 达必佳(短效)  | 1350 | 10 | 2225   | 13 |
| 体外受精 | 新鲜周期 | 1 | 短效长方案 | 达必佳(短效)  | 1900 | 11 | 1200   | 5  |

|      |      |   |       |          |       |    |        |    |
|------|------|---|-------|----------|-------|----|--------|----|
| 体外受精 | 新鲜周期 | 1 | 短效长方案 | 达必佳(短效)  | 1425  | 11 | 1350   | 6  |
| 体外受精 | 新鲜周期 | 1 | 短效长方案 | 达必佳(短效)  | 1200  | 8  | 600    | 3  |
| 体外受精 | 新鲜周期 | 1 | 短效长方案 | 达菲林(短效), | 1350  | 10 | 750    | 6  |
| 体外受精 | 新鲜周期 | 1 | 短效长方案 | 达必佳(短效)  | 1600  | 8  | 1912.5 | 14 |
| 体外受精 | 新鲜周期 | 1 | 短效长方案 | 达菲林(短效), | 1800  | 10 | 750    | 4  |
| 体外受精 | 新鲜周期 | 1 | 短效长方案 | 达必佳(短效)  | 1800  | 9  | 450    | 2  |
| 体外受精 | 新鲜周期 | 1 | 短效长方案 | 达必佳(短效)  | 2200  | 11 | 825    | 11 |
| 体外受精 | 新鲜周期 | 1 | 短效长方案 | 达必佳(短效)  | 1350  | 9  | 1125   | 11 |
| 体外受精 | 新鲜周期 | 1 | 短效长方案 | 达必佳(短效)  | 1650  | 11 | 300    | 3  |
| 体外受精 | 新鲜周期 | 1 | 短效长方案 | 达必佳(短效)  | 600   | 6  | 1050   | 10 |
| 体外受精 | 新鲜周期 | 1 | 短效长方案 | 达必佳(短效)  | 700   | 7  | 2287.5 | 15 |
| 体外受精 | 新鲜周期 | 2 | 短效长方案 | 达必佳(短效)  | 1200  | 7  | 1275   | 9  |
| 体外受精 | 新鲜周期 | 1 | 短效长方案 | 达必佳(短效)  | 2700  | 13 | 450    | 3  |
| 体外受精 | 新鲜周期 | 2 | 短效长方案 | 达必佳(短效)  | 1200  | 9  | 525    | 4  |
| 体外受精 | 新鲜周期 | 1 | 短效长方案 | 达必佳(短效)  | 1650  | 13 | 1350   | 7  |
| 体外受精 | 新鲜周期 | 1 | 短效长方案 | 达必佳(短效)  | 1200  | 9  | 300    | 3  |
| 体外受精 | 新鲜周期 | 2 | 短效长方案 | 达必佳(短效)  | 1200  | 9  | 825    | 9  |
| 体外受精 | 新鲜周期 | 2 | 短效长方案 | 达菲林(短效), | 825   | 8  | 2250   | 15 |
| 体外受精 | 新鲜周期 | 1 | 短效长方案 | 达必佳(短效)  | 1350  | 10 | 3150   | 11 |
| 体外受精 | 新鲜周期 | 1 | 短效长方案 | 达必佳(短效)  | 1050  | 8  | 2775   | 12 |
| 体外受精 | 新鲜周期 | 1 | 短效长方案 | 达必佳(短效)  | 1800  | 10 | 1200   | 5  |
| 体外受精 | 新鲜周期 | 1 | 短效长方案 | 达必佳(短效)  | 1300  | 13 | 1237.5 | 14 |
| 体外受精 | 新鲜周期 | 1 | 短效长方案 | 达必佳(短效)  | 0     | 0  | 300    | 2  |
| 体外受精 | 新鲜周期 | 1 | 短效长方案 | 达必佳(短效)  | 1500  | 12 | 300    | 4  |
| 体外受精 | 新鲜周期 | 2 | 短效长方案 | 达必佳(短效)  | 1425  | 12 | 1500   | 13 |
| 体外受精 | 新鲜周期 | 1 | 短效长方案 | 达必佳(短效)  | 1100  | 11 | 450    | 5  |
| 体外受精 | 新鲜周期 | 2 | 短效长方案 | 达必佳(短效)  | 2250  | 10 | 975    | 10 |
| 体外受精 | 新鲜周期 | 1 | 短效长方案 | 达必佳(短效)  | 1200  | 12 | 825    | 8  |
| 体外受精 | 新鲜周期 | 1 | 短效长方案 | 达必佳(短效)  | 937.5 | 7  | 1162.5 | 7  |
| 体外受精 | 新鲜周期 | 1 | 短效长方案 | 达必佳(短效)  | 1350  | 9  | 0      | 0  |
| 体外受精 | 新鲜周期 | 1 | 短效长方案 | 达菲林(短效), | 700   | 7  | 300    | 1  |
| 体外受精 | 新鲜周期 | 1 | 短效长方案 | 达必佳(短效)  | 1200  | 10 | 2850   | 12 |
| 体外受精 | 新鲜周期 | 1 | 短效长方案 | 达必佳(短效)  | 1200  | 9  | 300    | 3  |
| 体外受精 | 新鲜周期 | 1 | 短效长方案 | 达必佳(短效)  | 1350  | 11 | 825    | 5  |
| 体外受精 | 新鲜周期 | 1 | 短效长方案 | 达必佳(短效)  | 1350  | 11 | 2025   | 8  |
| 体外受精 | 新鲜周期 | 1 | 短效长方案 | 达必佳(短效)  | 1200  | 9  | 450    | 4  |
| 体外受精 | 新鲜周期 | 2 | 短效长方案 | 达必佳(短效)  | 650   | 5  | 825    | 5  |
| 体外受精 | 新鲜周期 | 1 | 短效长方案 | 达必佳(短效)  | 1350  | 11 | 450    | 5  |
| 体外受精 | 新鲜周期 | 1 | 短效长方案 | 达必佳(短效)  | 1275  | 10 | 787.5  | 7  |
| 体外受精 | 新鲜周期 | 1 | 短效长方案 | 达必佳(短效)  | 1200  | 8  | 1350   | 11 |
| 体外受精 | 新鲜周期 | 1 | 短效长方案 | 达必佳(短效)  | 1900  | 11 | 900    | 5  |
| 体外受精 | 新鲜周期 | 1 | 短效长方案 | 达菲林(短效), | 1275  | 9  | 0      | 0  |
| 体外受精 | 新鲜周期 | 2 | 短效长方案 | 达菲林(短效), | 1050  | 7  | 450    | 2  |
| 体外受精 | 新鲜周期 | 1 | 短效长方案 | 达必佳(短效)  | 1050  | 7  | 1575   | 11 |
| 体外受精 | 新鲜周期 | 1 | 短效长方案 | 达必佳(短效)  | 1100  | 11 | 600    | 8  |
| 体外受精 | 新鲜周期 | 2 | 短效长方案 | 达菲林(短效), | 2475  | 11 | 1275   | 11 |
| 体外受精 | 新鲜周期 | 2 | 短效长方案 | 达必佳(短效)  | 1700  | 11 | 750    | 5  |
| 体外受精 | 新鲜周期 | 1 | 短效长方案 | 达菲林(长效), | 1200  | 8  | 300    | 2  |
| 体外受精 | 新鲜周期 | 1 | 短效长方案 | 达必佳(短效)  | 1200  | 9  | 150    | 2  |
| 体外受精 | 新鲜周期 | 1 | 短效长方案 | 达必佳(短效)  | 1200  | 9  | 375    | 3  |

|      |      |   |       |          |        |    |        |    |
|------|------|---|-------|----------|--------|----|--------|----|
| 体外受精 | 新鲜周期 | 1 | 短效长方案 | 达必佳(短效)  | 1500   | 9  | 450    | 3  |
| 体外受精 | 新鲜周期 | 3 | 短效长方案 | 达必佳(短效)  | 1200   | 8  | 5925   | 22 |
| 体外受精 | 新鲜周期 | 1 | 短效长方案 | 达必佳(短效)  | 1087.5 | 10 | 600    | 3  |
| 体外受精 | 新鲜周期 | 1 | 短效长方案 | 达必佳(短效)  | 1600   | 8  | 675    | 3  |
| 体外受精 | 新鲜周期 | 1 | 短效长方案 | 达必佳(短效)  | 1350   | 10 | 1350   | 9  |
| 体外受精 | 新鲜周期 | 1 | 短效长方案 | 达必佳(短效)  | 600    | 6  | 1725   | 12 |
| 体外受精 | 新鲜周期 | 2 | 短效长方案 | 达菲林(短效), | 1200   | 8  | 3750   | 9  |
| 体外受精 | 新鲜周期 | 1 | 短效长方案 | 达必佳(短效)  | 1200   | 9  | 1050   | 7  |
| 体外受精 | 新鲜周期 | 1 | 短效长方案 | 达必佳(短效)  | 1350   | 10 | 1200   | 8  |
| 体外受精 | 新鲜周期 | 1 | 短效长方案 | 达必佳(短效)  | 1350   | 10 | 1850   | 11 |
| 体外受精 | 新鲜周期 | 1 | 短效长方案 | 达必佳(短效)  | 1200   | 10 | 1200   | 7  |
| 体外受精 | 新鲜周期 | 1 | 短效长方案 | 达必佳(短效)  | 1200   | 8  | 1275   | 8  |
| 体外受精 | 新鲜周期 | 1 | 短效长方案 | 达必佳(短效)  | 1175   | 11 | 3375   | 16 |
| 体外受精 | 新鲜周期 | 2 | 短效长方案 | 达必佳(短效)  | 1350   | 7  | 2400   | 9  |
| 体外受精 | 新鲜周期 | 1 | 短效长方案 | 达必佳(短效)  | 1200   | 9  | 600    | 5  |
| 体外受精 | 新鲜周期 | 2 | 短效长方案 | 达必佳(短效)  | 2000   | 11 | 900    | 4  |
| 体外受精 | 新鲜周期 | 1 | 短效长方案 | 达必佳(短效)  | 1125   | 9  | 900    | 6  |
| 体外受精 | 新鲜周期 | 1 | 短效长方案 | 达必佳(短效)  | 450    | 4  | 300    | 3  |
| 体外受精 | 新鲜周期 | 1 | 短效长方案 | 达菲林(短效), | 675    | 7  | 1575   | 7  |
| 体外受精 | 新鲜周期 | 1 | 短效长方案 | 达必佳(短效)  | 1200   | 9  | 1650   | 7  |
| 体外受精 | 新鲜周期 | 1 | 短效长方案 | 达必佳(短效)  | 1350   | 14 | 1612.5 | 9  |
| 体外受精 | 新鲜周期 | 3 | 短效长方案 | 达菲林(短效), | 1350   | 9  | 300    | 8  |
| 体外受精 | 新鲜周期 | 2 | 短效长方案 | 达必佳(短效)  | 1200   | 12 | 1500   | 8  |
| 体外受精 | 新鲜周期 | 1 | 短效长方案 | 达必佳(短效)  | 1200   | 9  | 225    | 3  |
| 体外受精 | 新鲜周期 | 2 | 短效长方案 | 达必佳(短效)  | 1125   | 9  | 450    | 4  |
| 体外受精 | 新鲜周期 | 1 | 短效长方案 | 达必佳(短效)  | 1350   | 10 | 525    | 3  |
| 体外受精 | 新鲜周期 | 1 | 短效长方案 | 达必佳(短效)  | 2200   | 11 | 825    | 11 |
| 体外受精 | 新鲜周期 | 1 | 短效长方案 | 达必佳(短效)  | 1575   | 8  | 450    | 4  |
| 体外受精 | 新鲜周期 | 1 | 短效长方案 | 达必佳(短效)  | 1050   | 7  | 1575   | 7  |
| 体外受精 | 新鲜周期 | 1 | 短效长方案 | 达必佳(短效)  | 1350   | 11 | 300    | 4  |
| 体外受精 | 新鲜周期 | 1 | 短效长方案 | 达必佳(短效)  | 1200   | 9  | 300    | 3  |
| 体外受精 | 新鲜周期 | 2 | 短效长方案 | 达必佳(短效)  | 1000   | 5  | 1500   | 8  |
| 体外受精 | 新鲜周期 | 1 | 短效长方案 | 达必佳(短效)  | 1200   | 9  | 300    | 3  |
| 体外受精 | 新鲜周期 | 1 | 短效长方案 | 达必佳(短效)  | 1350   | 8  | 750    | 6  |
| 体外受精 | 新鲜周期 | 1 | 短效长方案 | 达必佳(短效)  | 1200   | 9  | 300    | 3  |
| 体外受精 | 新鲜周期 | 1 | 短效长方案 | 达必佳(短效)  | 2000   | 10 | 300    | 2  |
| 体外受精 | 新鲜周期 | 1 | 短效长方案 | 达必佳(短效)  | 1800   | 11 | 600    | 4  |
| 体外受精 | 新鲜周期 | 1 | 短效长方案 | 达必佳(短效)  | 1200   | 9  | 150    | 2  |
| 体外受精 | 新鲜周期 | 1 | 短效长方案 | 达必佳(短效)  | 1275   | 10 | 1200   | 7  |
| 体外受精 | 新鲜周期 | 3 | 短效长方案 | 达菲林(短效), | 0      | 0  | 3075   | 8  |
| 体外受精 | 新鲜周期 | 1 | 短效长方案 | 达必佳(短效)  | 1200   | 10 | 300    | 4  |
| 体外受精 | 新鲜周期 | 1 | 短效长方案 | 达必佳(短效)  | 1800   | 10 | 825    | 5  |
| 体外受精 | 新鲜周期 | 1 | 短效长方案 | 达必佳(短效)  | 1850   | 10 | 225    | 3  |
| 体外受精 | 新鲜周期 | 1 | 短效长方案 | 达必佳(短效)  | 1350   | 9  | 412.5  | 5  |
| 体外受精 | 新鲜周期 | 2 | 短效长方案 | 达必佳(短效)  | 1200   | 9  | 450    | 4  |
| 体外受精 | 新鲜周期 | 1 | 短效长方案 | 达必佳(短效)  | 1800   | 9  | 0      | 0  |
| 体外受精 | 新鲜周期 | 1 | 短效长方案 | 达必佳(短效)  | 1200   | 9  | 150    | 2  |
| 体外受精 | 新鲜周期 | 1 | 短效长方案 | 达必佳(短效)  | 1050   | 10 | 150    | 2  |
| 体外受精 | 新鲜周期 | 1 | 短效长方案 | 达必佳(短效)  | 1275   | 9  | 0      | 0  |
| 体外受精 | 新鲜周期 | 1 | 短效长方案 | 达必佳(短效)  | 1200   | 9  | 375    | 3  |



|      |      |   |       |          |      |    |       |    |
|------|------|---|-------|----------|------|----|-------|----|
| 体外受精 | 新鲜周期 | 3 | 短效长方案 | 达必佳(短效)  | 2000 | 10 | 1725  | 10 |
| 体外受精 | 新鲜周期 | 1 | 短效长方案 | 达必佳(短效)  | 1350 | 7  | 2850  | 9  |
| 体外受精 | 新鲜周期 | 1 | 短效长方案 | 达必佳(短效)  | 1650 | 12 | 300   | 3  |
| 体外受精 | 新鲜周期 | 4 | 短效长方案 | 达必佳(短效)  | 1200 | 12 | 1725  | 10 |
| 体外受精 | 新鲜周期 | 1 | 短效长方案 | 达必佳(短效)  | 1275 | 10 | 375   | 4  |
| 体外受精 | 新鲜周期 | 1 | 短效长方案 | 达必佳(短效)  | 1125 | 11 | 1725  | 7  |
| 体外受精 | 新鲜周期 | 1 | 短效长方案 | 达必佳(短效)  | 1200 | 9  | 2400  | 8  |
| 体外受精 | 新鲜周期 | 2 | 短效长方案 | 达必佳(短效)  | 1800 | 9  | 2325  | 9  |
| 体外受精 | 新鲜周期 | 2 | 短效长方案 | 达必佳(短效)  | 1250 | 9  | 900   | 4  |
| 体外受精 | 新鲜周期 | 2 | 短效长方案 | 达必佳(短效)  | 1350 | 11 | 300   | 4  |
| 体外受精 | 新鲜周期 | 2 | 短效长方案 | 达必佳(短效)  | 2000 | 10 | 1050  | 12 |
| 体外受精 | 新鲜周期 | 1 | 短效长方案 | 达必佳(短效)  | 1200 | 9  | 150   | 2  |
| 体外受精 | 新鲜周期 | 2 | 短效长方案 | 达必佳(短效)  | 1350 | 11 | 375   | 4  |
| 体外受精 | 新鲜周期 | 1 | 短效长方案 | 达必佳(短效)  | 1275 | 10 | 1950  | 8  |
| 体外受精 | 新鲜周期 | 1 | 短效长方案 | 达必佳(短效)  | 1150 | 7  | 3150  | 7  |
| 体外受精 | 新鲜周期 | 1 | 短效长方案 | 达必佳(短效)  | 1200 | 9  | 150   | 2  |
| 体外受精 | 新鲜周期 | 1 | 短效长方案 | 达必佳(短效)  | 1800 | 11 | 1125  | 6  |
| 体外受精 | 新鲜周期 | 1 | 短效长方案 | 达必佳(短效)  | 1050 | 7  | 750   | 4  |
| 体外受精 | 新鲜周期 | 1 | 短效长方案 | 达必佳(短效)  | 1500 | 6  | 1200  | 4  |
| 体外受精 | 新鲜周期 | 1 | 短效长方案 | 达必佳(短效)  | 1875 | 10 | 1275  | 7  |
| 体外受精 | 新鲜周期 | 1 | 短效长方案 | 达必佳(短效)  | 1200 | 8  | 300   | 2  |
| 体外受精 | 新鲜周期 | 2 | 短效长方案 | 达必佳(短效)  | 2025 | 10 | 825   | 5  |
| 体外受精 | 新鲜周期 | 1 | 短效长方案 | 达必佳(短效)  | 1275 | 10 | 225   | 3  |
| 体外受精 | 新鲜周期 | 1 | 短效长方案 | 达必佳(短效)  | 1200 | 9  | 525   | 4  |
| 体外受精 | 新鲜周期 | 3 | 短效长方案 | 达必佳(短效)  | 1200 | 9  | 300   | 3  |
| 体外受精 | 新鲜周期 | 2 | 短效长方案 | 达必佳(短效)  | 2025 | 9  | 675   | 3  |
| 体外受精 | 新鲜周期 | 1 | 短效长方案 | 达必佳(短效)  | 1200 | 9  | 2550  | 7  |
| 体外受精 | 新鲜周期 | 1 | 短效长方案 | 达必佳(短效)  | 1350 | 6  | 1950  | 11 |
| 体外受精 | 新鲜周期 | 2 | 短效长方案 | 达必佳(短效)  | 1800 | 10 | 450   | 3  |
| 体外受精 | 新鲜周期 | 1 | 短效长方案 | 达必佳(短效)  | 1200 | 8  | 225   | 2  |
| 体外受精 | 新鲜周期 | 1 | 短效长方案 | 达必佳(短效)  | 1275 | 10 | 525   | 5  |
| 体外受精 | 新鲜周期 | 3 | 短效长方案 | 达必佳(短效)  | 1875 | 10 | 0     | 0  |
| 体外受精 | 新鲜周期 | 1 | 短效长方案 | 达菲林(短效), | 1125 | 11 | 337.5 | 6  |
| 体外受精 | 新鲜周期 | 1 | 短效长方案 | 达必佳(短效)  | 1200 | 8  | 900   | 4  |
| 体外受精 | 新鲜周期 | 2 | 短效长方案 | 达必佳(短效)  | 1800 | 9  | 750   | 4  |
| 体外受精 | 新鲜周期 | 1 | 短效长方案 | 达必佳(短效)  | 1800 | 12 | 637.5 | 10 |
| 体外受精 | 新鲜周期 | 1 | 短效长方案 | 达必佳(短效)  | 1350 | 9  | 300   | 2  |
| 体外受精 | 新鲜周期 | 1 | 短效长方案 | 达必佳(短效)  | 1400 | 10 | 1350  | 12 |
| 体外受精 | 新鲜周期 | 2 | 短效长方案 | 达必佳(短效)  | 1200 | 9  | 375   | 3  |
| 体外受精 | 新鲜周期 | 1 | 短效长方案 | 达必佳(短效)  | 1200 | 9  | 150   | 2  |
| 体外受精 | 新鲜周期 | 1 | 短效长方案 | 达必佳(短效)  | 1200 | 9  | 150   | 2  |
| 体外受精 | 新鲜周期 | 2 | 短效长方案 | 达必佳(短效)  | 2475 | 11 | 225   | 1  |
| 体外受精 | 新鲜周期 | 1 | 短效长方案 | 达必佳(短效)  | 450  | 4  | 2100  | 10 |
| 体外受精 | 新鲜周期 | 1 | 短效长方案 | 达必佳(短效)  | 1875 | 10 | 900   | 4  |
| 体外受精 | 新鲜周期 | 1 | 短效长方案 | 达必佳(短效)  | 1200 | 9  | 450   | 4  |
| 体外受精 | 新鲜周期 | 1 | 短效长方案 | 达必佳(短效)  | 1350 | 8  | 1275  | 6  |
| 体外受精 | 新鲜周期 | 2 | 短效长方案 | 达必佳(短效)  | 1200 | 9  | 450   | 4  |
| 体外受精 | 新鲜周期 | 1 | 短效长方案 | 达必佳(短效)  | 1350 | 8  | 1350  | 6  |
| 体外受精 | 新鲜周期 | 2 | 短效长方案 | 达必佳(短效)  | 1200 | 9  | 825   | 6  |
| 体外受精 | 新鲜周期 | 1 | 短效长方案 | 达必佳(短效)  | 1275 | 6  | 975   | 5  |

|      |      |   |       |          |      |    |       |    |
|------|------|---|-------|----------|------|----|-------|----|
| 体外受精 | 新鲜周期 | 1 | 短效长方案 | 达必佳(短效)  | 1050 | 7  | 450   | 3  |
| 体外受精 | 新鲜周期 | 1 | 短效长方案 | 达必佳(短效)  | 1200 | 8  | 300   | 2  |
| 体外受精 | 新鲜周期 | 1 | 短效长方案 | 达必佳(短效)  | 2100 | 9  | 600   | 4  |
| 体外受精 | 新鲜周期 | 1 | 短效长方案 | 达必佳(短效)  | 1800 | 9  | 750   | 4  |
| 体外受精 | 新鲜周期 | 2 | 短效长方案 | 达必佳(短效)  | 1575 | 7  | 2250  | 6  |
| 体外受精 | 新鲜周期 | 1 | 短效长方案 | 达必佳(短效)  | 1900 | 11 | 750   | 4  |
| 体外受精 | 新鲜周期 | 1 | 短效长方案 | 达必佳(短效)  | 1875 | 9  | 375   | 3  |
| 体外受精 | 新鲜周期 | 1 | 短效长方案 | 达必佳(短效)  | 1350 | 10 | 2325  | 14 |
| 体外受精 | 新鲜周期 | 1 | 短效长方案 | 达必佳(短效)  | 2000 | 10 | 1350  | 6  |
| 体外受精 | 新鲜周期 | 3 | 短效长方案 | 达必佳(短效)  | 1900 | 10 | 150   | 2  |
| 体外受精 | 新鲜周期 | 1 | 短效长方案 | 达必佳(短效)  | 1125 | 8  | 150   | 2  |
| 体外受精 | 新鲜周期 | 1 | 短效长方案 | 达必佳(短效)  | 1200 | 8  | 150   | 2  |
| 体外受精 | 新鲜周期 | 1 | 短效长方案 | 达必佳(短效)  | 1275 | 10 | 600   | 5  |
| 体外受精 | 新鲜周期 | 1 | 短效长方案 | 达必佳(短效)  | 825  | 8  | 412.5 | 6  |
| 体外受精 | 新鲜周期 | 1 | 短效长方案 | 达必佳(短效)  | 900  | 7  | 3900  | 10 |
| 体外受精 | 新鲜周期 | 1 | 短效长方案 | 达必佳(短效)  | 825  | 7  | 375   | 5  |
| 体外受精 | 新鲜周期 | 2 | 短效长方案 | 达必佳(短效)  | 1275 | 10 | 225   | 3  |
| 体外受精 | 新鲜周期 | 1 | 短效长方案 | 达必佳(短效)  | 1350 | 11 | 1200  | 6  |
| 体外受精 | 新鲜周期 | 1 | 短效长方案 | 达必佳(短效)  | 1650 | 7  | 1050  | 4  |
| 体外受精 | 新鲜周期 | 1 | 短效长方案 | 达必佳(短效)  | 1200 | 6  | 1500  | 6  |
| 体外受精 | 新鲜周期 | 1 | 短效长方案 | 达必佳(短效)  | 1200 | 10 | 450   | 5  |
| 体外受精 | 新鲜周期 | 1 | 短效长方案 | 达必佳(短效)  | 825  | 7  | 4125  | 13 |
| 体外受精 | 新鲜周期 | 1 | 短效长方案 | 达必佳(短效)  | 1350 | 10 | 750   | 6  |
| 体外受精 | 新鲜周期 | 1 | 短效长方案 | 达必佳(短效)  | 1800 | 9  | 900   | 5  |
| 体外受精 | 新鲜周期 | 1 | 短效长方案 | 达必佳(短效)  | 2100 | 8  | 750   | 6  |
| 体外受精 | 新鲜周期 | 1 | 短效长方案 | 达必佳(短效)  | 1050 | 8  | 4350  | 17 |
| 体外受精 | 新鲜周期 | 1 | 短效长方案 | 达必佳(短效)  | 1425 | 13 | 3225  | 9  |
| 体外受精 | 新鲜周期 | 1 | 短效长方案 | 达必佳(短效)  | 1950 | 10 | 150   | 2  |
| 体外受精 | 新鲜周期 | 1 | 短效长方案 | 达必佳(短效)  | 1050 | 9  | 2550  | 14 |
| 体外受精 | 新鲜周期 | 1 | 短效长方案 | 达必佳(短效)  | 1800 | 9  | 4350  | 13 |
| 体外受精 | 新鲜周期 | 1 | 短效长方案 | 达必佳(短效)  | 1200 | 8  | 525   | 8  |
| 体外受精 | 新鲜周期 | 1 | 短效长方案 | 达必佳(短效)  | 825  | 7  | 525   | 5  |
| 体外受精 | 新鲜周期 | 1 | 短效长方案 | 达必佳(短效)  | 1050 | 9  | 1200  | 10 |
| 体外受精 | 新鲜周期 | 1 | 短效长方案 | 达必佳(短效)  | 1350 | 9  | 525   | 5  |
| 体外受精 | 新鲜周期 | 1 | 短效长方案 | 达必佳(短效)  | 1050 | 10 | 1425  | 11 |
| 体外受精 | 新鲜周期 | 1 | 短效长方案 | 达必佳(短效)  | 900  | 7  | 2850  | 7  |
| 体外受精 | 新鲜周期 | 1 | 短效长方案 | 达必佳(短效)  | 1500 | 10 | 450   | 3  |
| 体外受精 | 新鲜周期 | 1 | 短效长方案 | 达必佳(短效)  | 1450 | 9  | 675   | 4  |
| 体外受精 | 新鲜周期 | 1 | 短效长方案 | 达菲林(短效), | 1050 | 7  | 1650  | 5  |
| 体外受精 | 新鲜周期 | 1 | 短效长方案 | 达必佳(短效)  | 1350 | 10 | 300   | 3  |
| 体外受精 | 新鲜周期 | 1 | 短效长方案 | 达必佳(短效)  | 1350 | 12 | 1650  | 13 |
| 体外受精 | 新鲜周期 | 1 | 短效长方案 | 达必佳(短效)  | 1800 | 10 | 300   | 2  |
| 体外受精 | 新鲜周期 | 1 | 短效长方案 | 达必佳(短效)  | 1350 | 10 | 750   | 5  |
| 体外受精 | 新鲜周期 | 2 | 短效长方案 | 达必佳(短效)  | 1575 | 10 | 1875  | 9  |
| 体外受精 | 新鲜周期 | 1 | 短效长方案 | 达必佳(短效)  | 825  | 7  | 975   | 10 |
| 体外受精 | 新鲜周期 | 1 | 短效长方案 | 达必佳(短效)  | 1350 | 11 | 1350  | 12 |
| 体外受精 | 新鲜周期 | 1 | 短效长方案 | 达必佳(短效)  | 2175 | 10 | 750   | 4  |
| 体外受精 | 新鲜周期 | 1 | 短效长方案 | 达必佳(短效)  | 1275 | 10 | 375   | 4  |
| 体外受精 | 新鲜周期 | 1 | 短效长方案 | 达必佳(短效)  | 1350 | 10 | 150   | 2  |
| 体外受精 | 新鲜周期 | 1 | 短效长方案 | 达菲林(短效), | 1200 | 9  | 750   | 6  |

|      |      |   |       |          |       |    |        |    |
|------|------|---|-------|----------|-------|----|--------|----|
| 体外受精 | 新鲜周期 | 2 | 短效长方案 | 达必佳(短效)  | 900   | 8  | 3300   | 11 |
| 体外受精 | 新鲜周期 | 1 | 短效长方案 | 达必佳(短效)  | 1275  | 10 | 1725   | 10 |
| 体外受精 | 新鲜周期 | 1 | 短效长方案 | 达必佳(短效)  | 750   | 5  | 2550   | 8  |
| 体外受精 | 新鲜周期 | 1 | 短效长方案 | 达必佳(短效)  | 1275  | 9  | 150    | 2  |
| 体外受精 | 新鲜周期 | 1 | 短效长方案 | 达必佳(短效)  | 1200  | 8  | 600    | 4  |
| 体外受精 | 新鲜周期 | 1 | 短效长方案 | 达必佳(短效)  | 1200  | 6  | 0      | 0  |
| 体外受精 | 新鲜周期 | 1 | 短效长方案 | 达必佳(短效)  | 2025  | 10 | 600    | 5  |
| 体外受精 | 新鲜周期 | 1 | 短效长方案 | 达必佳(短效)  | 1275  | 10 | 1725   | 12 |
| 体外受精 | 新鲜周期 | 1 | 短效长方案 | 达菲林(短效), | 1350  | 10 | 1125   | 11 |
| 体外受精 | 新鲜周期 | 1 | 短效长方案 | 达必佳(短效)  | 2100  | 10 | 150    | 2  |
| 体外受精 | 新鲜周期 | 1 | 短效长方案 | 达必佳(短效)  | 1350  | 10 | 900    | 10 |
| 体外受精 | 新鲜周期 | 1 | 短效长方案 | 达菲林(短效), | 1350  | 9  | 975    | 10 |
| 体外受精 | 新鲜周期 | 1 | 短效长方案 | 达菲林(短效), | 1425  | 12 | 2625   | 9  |
| 体外受精 | 新鲜周期 | 2 | 短效长方案 | 达必佳(短效)  | 2175  | 13 | 3000   | 10 |
| 体外受精 | 新鲜周期 | 3 | 短效长方案 | 达菲林(短效), | 1050  | 7  | 1575   | 11 |
| 体外受精 | 新鲜周期 | 1 | 短效长方案 | 达必佳(短效)  | 1050  | 7  | 2100   | 8  |
| 体外受精 | 新鲜周期 | 1 | 短效长方案 | 达菲林(长效), | 1800  | 9  | 675    | 5  |
| 体外受精 | 新鲜周期 | 1 | 短效长方案 | 达菲林(短效), | 900   | 7  | 2475   | 8  |
| 体外受精 | 新鲜周期 | 1 | 短效长方案 | 达必佳(短效)  | 1500  | 10 | 750    | 10 |
| 体外受精 | 新鲜周期 | 1 | 短效长方案 | 达必佳(短效)  | 1350  | 10 | 1650   | 12 |
| 体外受精 | 新鲜周期 | 1 | 短效长方案 | 达菲林(短效), | 1050  | 7  | 2550   | 8  |
| 体外受精 | 新鲜周期 | 1 | 短效长方案 | 达菲林(短效), | 1200  | 9  | 1125   | 5  |
| 体外受精 | 新鲜周期 | 2 | 短效长方案 | 达菲林(短效), | 1425  | 11 | 675    | 6  |
| 体外受精 | 新鲜周期 | 1 | 短效长方案 | 达必佳(短效)  | 1350  | 10 | 975    | 7  |
| 体外受精 | 新鲜周期 | 1 | 短效长方案 | 达菲林(短效), | 1200  | 9  | 1650   | 9  |
| 体外受精 | 新鲜周期 | 1 | 短效长方案 | 达必佳(短效)  | 2175  | 12 | 2325   | 12 |
| 体外受精 | 新鲜周期 | 1 | 短效长方案 | 达菲林(短效), | 1000  | 10 | 975    | 11 |
| 体外受精 | 新鲜周期 | 1 | 短效长方案 | 达菲林(短效), | 1125  | 10 | 3375   | 14 |
| 体外受精 | 新鲜周期 | 1 | 短效长方案 | 达必佳(短效)  | 1500  | 10 | 0      | 0  |
| 体外受精 | 新鲜周期 | 1 | 短效长方案 | 达菲林(短效), | 1050  | 7  | 1275   | 7  |
| 体外受精 | 新鲜周期 | 1 | 短效长方案 | 达必佳(短效)  | 937.5 | 7  | 1387.5 | 11 |
| 体外受精 | 新鲜周期 | 1 | 短效长方案 | 达菲林(短效), | 1200  | 9  | 600    | 4  |
| 体外受精 | 新鲜周期 | 1 | 短效长方案 | 达菲林(短效), | 900   | 7  | 3600   | 10 |
| 体外受精 | 新鲜周期 | 1 | 短效长方案 | 达菲林(短效), | 1350  | 10 | 1050   | 7  |
| 体外受精 | 新鲜周期 | 1 | 短效长方案 | 达菲林(短效), | 1350  | 10 | 975    | 7  |
| 体外受精 | 新鲜周期 | 1 | 短效长方案 | 达菲林(短效), | 1200  | 9  | 300    | 3  |
| 体外受精 | 新鲜周期 | 1 | 短效长方案 | 达菲林(短效), | 1350  | 9  | 825    | 7  |
| 体外受精 | 新鲜周期 | 2 | 短效长方案 | 达必佳(短效)  | 1050  | 7  | 450    | 3  |
| 体外受精 | 新鲜周期 | 1 | 短效长方案 | 达菲林(短效), | 1350  | 10 | 1200   | 8  |
| 体外受精 | 新鲜周期 | 1 | 短效长方案 | 达菲林(短效), | 1350  | 10 | 150    | 2  |
| 体外受精 | 新鲜周期 | 1 | 短效长方案 | 达菲林(短效), | 1200  | 8  | 1350   | 8  |
| 体外受精 | 新鲜周期 | 1 | 短效长方案 | 达菲林(短效), | 1350  | 11 | 1050   | 5  |
| 体外受精 | 新鲜周期 | 1 | 短效长方案 | 达菲林(短效), | 1200  | 9  | 2700   | 13 |
| 体外受精 | 新鲜周期 | 1 | 短效长方案 | 达菲林(短效), | 1200  | 9  | 300    | 3  |
| 体外受精 | 新鲜周期 | 1 | 短效长方案 | 达必佳(短效)  | 1050  | 9  | 1012.5 | 11 |
| 体外受精 | 新鲜周期 | 1 | 短效长方案 | 达菲林(短效), | 1275  | 10 | 225    | 3  |
| 体外受精 | 新鲜周期 | 1 | 短效长方案 | 达菲林(短效), | 1200  | 9  | 825    | 9  |
| 体外受精 | 新鲜周期 | 1 | 短效长方案 | 达必佳(短效)  | 450   | 4  | 1125   | 8  |
| 体外受精 | 新鲜周期 | 1 | 短效长方案 | 达菲林(短效), | 1050  | 7  | 1575   | 7  |
| 体外受精 | 新鲜周期 | 1 | 短效长方案 | 达必佳(短效)  | 2925  | 13 | 1125   | 13 |

|      |      |   |       |          |       |    |       |    |
|------|------|---|-------|----------|-------|----|-------|----|
| 体外受精 | 新鲜周期 | 1 | 短效长方案 | 达必佳(短效)  | 937.5 | 7  | 975   | 7  |
| 体外受精 | 新鲜周期 | 1 | 短效长方案 | 达菲林(短效), | 1350  | 10 | 2550  | 8  |
| 体外受精 | 新鲜周期 | 1 | 短效长方案 | 达菲林(短效), | 1050  | 7  | 300   | 2  |
| 体外受精 | 新鲜周期 | 1 | 短效长方案 | 达菲林(短效), | 900   | 7  | 450   | 4  |
| 体外受精 | 新鲜周期 | 1 | 短效长方案 | 达菲林(短效), | 1350  | 11 | 2550  | 10 |
| 体外受精 | 新鲜周期 | 1 | 短效长方案 | 达菲林(短效), | 1200  | 8  | 600   | 4  |
| 体外受精 | 新鲜周期 | 1 | 短效长方案 | 达菲林(短效), | 1200  | 9  | 750   | 4  |
| 体外受精 | 新鲜周期 | 1 | 短效长方案 | 达菲林(短效), | 900   | 4  | 4050  | 9  |
| 体外受精 | 新鲜周期 | 1 | 短效长方案 | 达菲林(短效), | 1200  | 8  | 1275  | 6  |
| 体外受精 | 新鲜周期 | 2 | 短效长方案 | 达菲林(短效), | 1800  | 10 | 1125  | 6  |
| 体外受精 | 新鲜周期 | 1 | 短效长方案 | 达菲林(短效), | 1200  | 9  | 300   | 3  |
| 体外受精 | 新鲜周期 | 2 | 短效长方案 | 达菲林(短效), | 750   | 8  | 750   | 7  |
| 体外受精 | 新鲜周期 | 2 | 短效长方案 | 达菲林(短效), | 1200  | 9  | 675   | 5  |
| 体外受精 | 新鲜周期 | 1 | 短效长方案 | 达菲林(短效), | 1350  | 10 | 2325  | 9  |
| 体外受精 | 新鲜周期 | 1 | 短效长方案 | 达菲林(短效), | 1050  | 9  | 637.5 | 5  |
| 体外受精 | 新鲜周期 | 1 | 短效长方案 | 达菲林(短效), | 1875  | 9  | 825   | 5  |
| 体外受精 | 新鲜周期 | 1 | 短效长方案 | 达菲林(短效), | 900   | 6  | 900   | 4  |
| 体外受精 | 新鲜周期 | 3 | 短效长方案 | 达必佳(短效)  | 1200  | 8  | 3750  | 12 |
| 体外受精 | 新鲜周期 | 1 | 短效长方案 | 达菲林(短效), | 900   | 8  | 2025  | 8  |
| 体外受精 | 新鲜周期 | 1 | 短效长方案 | 达菲林(短效), | 1350  | 10 | 450   | 4  |
| 体外受精 | 新鲜周期 | 1 | 短效长方案 | 达菲林(短效), | 900   | 7  | 825   | 5  |
| 体外受精 | 新鲜周期 | 1 | 短效长方案 | 达菲林(短效), | 900   | 6  | 2700  | 12 |
| 体外受精 | 新鲜周期 | 1 | 短效长方案 | 达菲林(短效), | 1500  | 11 | 750   | 7  |
| 体外受精 | 新鲜周期 | 1 | 短效长方案 | 达菲林(短效), | 1050  | 7  | 1575  | 5  |
| 体外受精 | 新鲜周期 | 1 | 短效长方案 | 达菲林(短效), | 1050  | 11 | 3075  | 8  |
| 体外受精 | 新鲜周期 | 1 | 短效长方案 | 达必佳(短效)  | 937.5 | 9  | 1500  | 13 |
| 体外受精 | 新鲜周期 | 1 | 短效长方案 | 达菲林(短效), | 1200  | 9  | 150   | 2  |
| 体外受精 | 新鲜周期 | 1 | 短效长方案 | 达菲林(短效), | 1350  | 11 | 300   | 4  |
| 体外受精 | 新鲜周期 | 1 | 短效长方案 | 达菲林(短效), | 1200  | 9  | 300   | 3  |
| 体外受精 | 新鲜周期 | 1 | 短效长方案 | 达菲林(长效), | 1500  | 10 | 600   | 10 |
| 体外受精 | 新鲜周期 | 1 | 短效长方案 | 二至天癸方, 补 | 1350  | 9  | 675   | 9  |
| 体外受精 | 新鲜周期 | 2 | 短效长方案 | 达必佳(短效)  | 900   | 7  | 2100  | 10 |
| 体外受精 | 新鲜周期 | 1 | 短效长方案 | 达必佳(短效)  | 1050  | 8  | 1950  | 6  |
| 体外受精 | 新鲜周期 | 1 | 短效长方案 | 达菲林(短效), | 450   | 3  | 1500  | 7  |
| 体外受精 | 新鲜周期 | 1 | 短效长方案 | 达必佳(短效)  | 900   | 7  | 2325  | 14 |
| 体外受精 | 新鲜周期 | 1 | 短效长方案 | 达菲林(短效), | 1800  | 9  | 2550  | 12 |
| 体外受精 | 新鲜周期 | 1 | 短效长方案 | 达菲林(短效), | 900   | 8  | 1725  | 12 |
| 体外受精 | 新鲜周期 | 1 | 短效长方案 | 达菲林(短效), | 1200  | 8  | 300   | 2  |
| 体外受精 | 新鲜周期 | 3 | 短效长方案 | 达菲林(短效), | 900   | 8  | 600   | 6  |
| 体外受精 | 新鲜周期 | 1 | 短效长方案 | 达菲林(短效), | 900   | 8  | 600   | 6  |
| 体外受精 | 新鲜周期 | 1 | 短效长方案 | 达必佳(短效)  | 2100  | 12 | 825   | 6  |
| 体外受精 | 新鲜周期 | 1 | 短效长方案 | 达菲林(短效), | 1050  | 7  | 1350  | 11 |
| 体外受精 | 新鲜周期 | 1 | 短效长方案 | 达菲林(短效), | 800   | 8  | 2100  | 13 |
| 体外受精 | 新鲜周期 | 2 | 短效长方案 | 达菲林(短效), | 1875  | 9  | 825   | 5  |
| 体外受精 | 新鲜周期 | 2 | 短效长方案 | 达菲林(短效), | 1050  | 7  | 1125  | 5  |
| 体外受精 | 新鲜周期 | 1 | 短效长方案 | 达菲林(短效), | 975   | 7  | 1275  | 7  |
| 体外受精 | 新鲜周期 | 1 | 短效长方案 | 达必佳(短效)  | 600   | 4  | 3900  | 10 |
| 体外受精 | 新鲜周期 | 1 | 短效长方案 | 达菲林(短效), | 1050  | 8  | 450   | 4  |
| 体外受精 | 新鲜周期 | 1 | 短效长方案 | 达菲林(短效), | 1275  | 10 | 300   | 4  |
| 体外受精 | 新鲜周期 | 1 | 短效长方案 | 达菲林(短效), | 1350  | 9  | 375   | 3  |

|      |      |   |       |          |        |    |        |    |
|------|------|---|-------|----------|--------|----|--------|----|
| 体外受精 | 新鲜周期 | 1 | 短效长方案 | 达菲林(短效), | 1275   | 10 | 375    | 4  |
| 体外受精 | 新鲜周期 | 2 | 短效长方案 | 达菲林(短效), | 1275   | 10 | 975    | 10 |
| 体外受精 | 新鲜周期 | 1 | 短效长方案 | 达菲林(短效), | 1275   | 10 | 300    | 4  |
| 体外受精 | 新鲜周期 | 1 | 短效长方案 | 达必佳 (短效  | 1350   | 9  | 562.5  | 6  |
| 体外受精 | 新鲜周期 | 1 | 短效长方案 | 达菲林(短效), | 2100   | 10 | 750    | 5  |
| 体外受精 | 新鲜周期 | 1 | 短效长方案 | 达菲林(短效), | 1350   | 11 | 1200   | 8  |
| 体外受精 | 新鲜周期 | 1 | 短效长方案 | 达菲林(短效), | 1350   | 9  | 1200   | 5  |
| 体外受精 | 新鲜周期 | 1 | 短效长方案 | 达菲林(短效), | 1200   | 9  | 450    | 4  |
| 体外受精 | 新鲜周期 | 2 | 短效长方案 | 达菲林(短效), | 1200   | 9  | 450    | 4  |
| 体外受精 | 新鲜周期 | 1 | 短效长方案 | 达必佳 (短效  | 1337.5 | 10 | 1125   | 5  |
| 体外受精 | 新鲜周期 | 1 | 短效长方案 | 达必佳 (短效  | 1912.5 | 11 | 375    | 5  |
| 体外受精 | 新鲜周期 | 1 | 短效长方案 | 达必佳 (短效  | 2400   | 13 | 750    | 5  |
| 体外受精 | 新鲜周期 | 1 | 短效长方案 | 达菲林(短效), | 1200   | 8  | 600    | 4  |
| 体外受精 | 新鲜周期 | 1 | 短效长方案 | 达菲林(短效), | 1200   | 8  | 3150   | 9  |
| 体外受精 | 新鲜周期 | 1 | 短效长方案 | 达必佳 (短效  | 1350   | 9  | 787.5  | 11 |
| 体外受精 | 新鲜周期 | 1 | 短效长方案 | 达菲林(短效), | 1200   | 9  | 150    | 2  |
| 体外受精 | 新鲜周期 | 1 | 短效长方案 | 达必佳 (短效  | 1275   | 13 | 2175   | 13 |
| 体外受精 | 新鲜周期 | 1 | 短效长方案 | 达菲林(短效), | 1350   | 11 | 1200   | 7  |
| 体外受精 | 新鲜周期 | 1 | 短效长方案 | 达菲林(短效), | 1350   | 7  | 1200   | 9  |
| 体外受精 | 新鲜周期 | 1 | 短效长方案 | 达菲林(短效), | 900    | 8  | 4800   | 16 |
| 体外受精 | 新鲜周期 | 1 | 短效长方案 | 达菲林(短效), | 1200   | 9  | 1425   | 8  |
| 体外受精 | 新鲜周期 | 1 | 短效长方案 | 达菲林(短效), | 1500   | 10 | 225    | 3  |
| 体外受精 | 新鲜周期 | 1 | 短效长方案 | 达必佳 (短效  | 937.5  | 9  | 1500   | 11 |
| 体外受精 | 新鲜周期 | 1 | 短效长方案 | 达必佳 (短效  | 1200   | 7  | 975    | 5  |
| 体外受精 | 新鲜周期 | 1 | 短效长方案 | 达菲林(短效), | 1350   | 9  | 1800   | 7  |
| 体外受精 | 新鲜周期 | 1 | 短效长方案 | 达菲林(短效), | 1200   | 9  | 2475   | 11 |
| 体外受精 | 新鲜周期 | 1 | 短效长方案 | 达必佳 (短效  | 1250   | 7  | 2850   | 11 |
| 体外受精 | 新鲜周期 | 1 | 短效长方案 | 达菲林(短效), | 1275   | 10 | 600    | 4  |
| 体外受精 | 新鲜周期 | 1 | 短效长方案 | 达菲林(短效), | 1275   | 10 | 3450   | 10 |
| 体外受精 | 新鲜周期 | 1 | 短效长方案 | 达菲林(短效), | 1350   | 7  | 3000   | 8  |
| 体外受精 | 新鲜周期 | 1 | 短效长方案 | 达菲林(短效), | 1200   | 9  | 900    | 5  |
| 体外受精 | 新鲜周期 | 1 | 短效长方案 | 达菲林(短效), | 1350   | 9  | 600    | 4  |
| 体外受精 | 新鲜周期 | 1 | 短效长方案 | 达必佳 (短效  | 0      | 0  | 3375   | 12 |
| 体外受精 | 新鲜周期 | 1 | 短效长方案 | 达菲林(短效), | 1275   | 10 | 375    | 4  |
| 体外受精 | 新鲜周期 | 1 | 短效长方案 | 达必佳 (短效  | 3000   | 13 | 675    | 3  |
| 体外受精 | 新鲜周期 | 1 | 短效长方案 | 达必佳 (短效  | 2700   | 15 | 1062.5 | 11 |
| 体外受精 | 新鲜周期 | 1 | 短效长方案 | 达必佳 (短效  | 2700   | 16 | 1500   | 12 |
| 体外受精 | 新鲜周期 | 1 | 短效长方案 | 达菲林(短效), | 1200   | 9  | 150    | 2  |
| 体外受精 | 新鲜周期 | 1 | 短效长方案 | 达必佳 (短效  | 1625   | 14 | 7462.5 | 20 |
| 体外受精 | 新鲜周期 | 1 | 短效长方案 | 达必佳 (短效  | 1200   | 8  | 825    | 6  |
| 体外受精 | 新鲜周期 | 2 | 短效长方案 | 达必佳 (短效  | 1350   | 11 | 2625   | 13 |
| 体外受精 | 新鲜周期 | 1 | 短效长方案 | 达必佳 (短效  | 2675   | 13 | 600    | 8  |
| 体外受精 | 新鲜周期 | 1 | 短效长方案 | 达必佳 (短效  | 1000   | 8  | 225    | 5  |
| 体外受精 | 新鲜周期 | 3 | 短效长方案 | 达菲林(短效), | 1200   | 8  | 600    | 4  |
| 体外受精 | 新鲜周期 | 1 | 短效长方案 | 达菲林(短效), | 1350   | 11 | 2025   | 13 |
| 体外受精 | 新鲜周期 | 1 | 短效长方案 | 达菲林(短效), | 900    | 6  | 1125   | 5  |
| 体外受精 | 新鲜周期 | 1 | 短效长方案 | 达必佳 (短效  | 1200   | 8  | 975    | 6  |
| 体外受精 | 新鲜周期 | 2 | 短效长方案 | 达菲林(短效), | 1800   | 9  | 525    | 5  |
| 体外受精 | 新鲜周期 | 1 | 短效长方案 | 达必佳 (短效  | 2550   | 15 | 337.5  | 4  |
| 体外受精 | 新鲜周期 | 1 | 短效长方案 | 达菲林(短效), | 1350   | 10 | 1125   | 11 |

|      |      |   |       |          |        |    |        |    |
|------|------|---|-------|----------|--------|----|--------|----|
| 体外受精 | 新鲜周期 | 1 | 短效长方案 | 达必佳(短效)  | 2000   | 10 | 562.5  | 10 |
| 体外受精 | 新鲜周期 | 1 | 短效长方案 | 达必佳(短效)  | 1387.5 | 12 | 4125   | 16 |
| 体外受精 | 新鲜周期 | 1 | 短效长方案 | 达必佳(短效)  | 1350   | 8  | 1800   | 9  |
| 体外受精 | 新鲜周期 | 1 | 短效长方案 | 达必佳(短效)  | 900    | 7  | 1012.5 | 9  |
| 体外受精 | 新鲜周期 | 1 | 短效长方案 | 达必佳(短效)  | 900    | 7  | 1687.5 | 11 |
| 体外受精 | 新鲜周期 | 1 | 短效长方案 | 达菲林(短效), | 1200   | 9  | 975    | 5  |
| 体外受精 | 新鲜周期 | 1 | 短效长方案 | 达必佳(短效)  | 1350   | 10 | 450    | 4  |
| 体外受精 | 新鲜周期 | 1 | 短效长方案 | 达菲林(短效), | 1350   | 10 | 150    | 2  |
| 体外受精 | 新鲜周期 | 1 | 短效长方案 | 达菲林(短效), | 1275   | 10 | 675    | 4  |
| 体外受精 | 新鲜周期 | 1 | 短效长方案 | 达必佳(短效)  | 1500   | 10 | 675    | 6  |
| 体外受精 | 新鲜周期 | 1 | 短效长方案 | 达必佳(短效)  | 1200   | 8  | 1425   | 11 |
| 体外受精 | 新鲜周期 | 1 | 短效长方案 | 达菲林(短效), | 1350   | 10 | 900    | 10 |
| 体外受精 | 新鲜周期 | 1 | 短效长方案 | 达菲林(短效), | 1200   | 9  | 450    | 3  |
| 体外受精 | 新鲜周期 | 1 | 短效长方案 | 达必佳(短效)  | 1200   | 9  | 750    | 4  |
| 体外受精 | 新鲜周期 | 1 | 短效长方案 | 达必佳(短效)  | 1400   | 10 | 1350   | 8  |
| 体外受精 | 新鲜周期 | 1 | 短效长方案 | 达必佳(短效)  | 1400   | 7  | 2325   | 10 |
| 体外受精 | 新鲜周期 | 1 | 短效长方案 | 达必佳(短效)  | 1275   | 10 | 1575   | 6  |
| 体外受精 | 新鲜周期 | 1 | 短效长方案 | 达菲林(短效), | 1800   | 9  | 300    | 3  |
| 体外受精 | 新鲜周期 | 1 | 短效长方案 | 达菲林(短效), | 750    | 8  | 150    | 2  |
| 体外受精 | 新鲜周期 | 1 | 短效长方案 | 达必佳(短效)  | 1500   | 10 | 150    | 4  |
| 体外受精 | 新鲜周期 | 1 | 短效长方案 | 达菲林(短效), | 1200   | 8  | 1050   | 11 |
| 体外受精 | 新鲜周期 | 3 | 短效长方案 | 达必佳(短效)  | 1350   | 11 | 1650   | 10 |
| 体外受精 | 新鲜周期 | 3 | 短效长方案 | 达菲林(短效), | 1200   | 9  | 750    | 6  |
| 体外受精 | 新鲜周期 | 2 | 短效长方案 | 达菲林(短效), | 1800   | 9  | 1200   | 11 |
| 体外受精 | 新鲜周期 | 3 | 短效长方案 | 达菲林(短效), | 1050   | 8  | 1200   | 5  |
| 体外受精 | 新鲜周期 | 1 | 短效长方案 | 达菲林(短效), | 1425   | 11 | 1425   | 7  |
| 体外受精 | 新鲜周期 | 1 | 短效长方案 | 达必佳(短效)  | 1350   | 9  | 150    | 2  |
| 体外受精 | 新鲜周期 | 1 | 短效长方案 | 达菲林(短效), | 1350   | 10 | 675    | 6  |
| 体外受精 | 新鲜周期 | 1 | 短效长方案 | 达必佳(短效)  | 825    | 9  | 825    | 6  |
| 体外受精 | 新鲜周期 | 1 | 短效长方案 | 达菲林(短效), | 1200   | 9  | 2100   | 12 |
| 体外受精 | 新鲜周期 | 1 | 短效长方案 | 达必佳(短效)  | 1200   | 8  | 2325   | 9  |
| 体外受精 | 新鲜周期 | 1 | 短效长方案 | 达必佳(短效)  | 1800   | 10 | 750    | 4  |
| 体外受精 | 新鲜周期 | 1 | 短效长方案 | 达必佳(短效)  | 600    | 6  | 5175   | 17 |
| 体外受精 | 新鲜周期 | 2 | 短效长方案 | 达必佳(短效)  | 1200   | 7  | 1725   | 10 |
| 体外受精 | 新鲜周期 | 1 | 短效长方案 | 达菲林(短效), | 1200   | 9  | 2400   | 12 |
| 体外受精 | 新鲜周期 | 1 | 短效长方案 | 达必佳(短效)  | 1350   | 10 | 1125   | 6  |
| 体外受精 | 新鲜周期 | 1 | 短效长方案 | 达菲林(短效), | 1200   | 8  | 450    | 4  |
| 体外受精 | 新鲜周期 | 1 | 短效长方案 | 达菲林(短效), | 1050   | 8  | 1200   | 6  |
| 体外受精 | 新鲜周期 | 1 | 短效长方案 | 达必佳(短效)  | 1350   | 9  | 0      | 0  |
| 体外受精 | 新鲜周期 | 1 | 短效长方案 | 达菲林(短效), | 1350   | 10 | 225    | 3  |
| 体外受精 | 新鲜周期 | 1 | 短效长方案 | 达菲林(长效), | 2025   | 11 | 450    | 3  |
| 体外受精 | 新鲜周期 | 1 | 短效长方案 | 达必佳(短效)  | 1350   | 10 | 1050   | 8  |
| 体外受精 | 新鲜周期 | 1 | 短效长方案 | 达必佳(短效)  | 1225   | 8  | 2550   | 12 |
| 体外受精 | 新鲜周期 | 1 | 短效长方案 | 达必佳(短效)  | 1300   | 11 | 3600   | 13 |
| 体外受精 | 新鲜周期 | 1 | 短效长方案 | 达必佳(短效)  | 825    | 8  | 225    | 2  |
| 体外受精 | 新鲜周期 | 1 | 短效长方案 | 达必佳(短效)  | 1250   | 7  | 1200   | 6  |
| 体外受精 | 新鲜周期 | 1 | 短效长方案 | 达必佳(短效)  | 937.5  | 7  | 375    | 4  |
| 体外受精 | 新鲜周期 | 1 | 短效长方案 | 达必佳(短效)  | 1050   | 6  | 2025   | 9  |
| 体外受精 | 新鲜周期 | 1 | 短效长方案 | 达菲林(短效), | 1200   | 8  | 1125   | 11 |
| 体外受精 | 新鲜周期 | 1 | 短效长方案 | 达必佳(短效)  | 1200   | 9  | 825    | 7  |

|      |      |   |       |          |       |    |      |    |
|------|------|---|-------|----------|-------|----|------|----|
| 体外受精 | 新鲜周期 | 1 | 短效长方案 | 达必佳(短效)  | 1200  | 12 | 3975 | 15 |
| 体外受精 | 新鲜周期 | 1 | 短效长方案 | 达必佳(短效)  | 1200  | 8  | 375  | 3  |
| 体外受精 | 新鲜周期 | 1 | 短效长方案 | 达必佳(短效)  | 1200  | 8  | 675  | 3  |
| 体外受精 | 新鲜周期 | 4 | 短效长方案 | 达必佳(短效)  | 1200  | 6  | 975  | 5  |
| 体外受精 | 新鲜周期 | 2 | 短效长方案 | 达必佳(短效)  | 1200  | 8  | 675  | 3  |
| 体外受精 | 新鲜周期 | 1 | 短效长方案 | 达菲林(短效), | 1125  | 9  | 225  | 3  |
| 体外受精 | 新鲜周期 | 1 | 短效长方案 | 达必佳(短效)  | 1050  | 8  | 450  | 4  |
| 体外受精 | 新鲜周期 | 2 | 短效长方案 | 达必佳(短效)  | 1200  | 8  | 450  | 4  |
| 体外受精 | 新鲜周期 | 1 | 短效长方案 | 达必佳(短效)  | 1200  | 9  | 450  | 4  |
| 体外受精 | 新鲜周期 | 1 | 短效长方案 | 达必佳(短效)  | 1200  | 8  | 825  | 7  |
| 体外受精 | 新鲜周期 | 1 | 短效长方案 | 达必佳(短效)  | 1200  | 12 | 525  | 7  |
| 体外受精 | 新鲜周期 | 1 | 短效长方案 | 达必佳(短效)  | 0     | 0  | 2850 | 12 |
| 体外受精 | 新鲜周期 | 2 | 短效长方案 | 达必佳(短效)  | 1250  | 8  | 1800 | 10 |
| 体外受精 | 新鲜周期 | 1 | 短效长方案 | 达必佳(短效)  | 1200  | 10 | 1200 | 8  |
| 体外受精 | 新鲜周期 | 1 | 短效长方案 | 达菲林(短效), | 1200  | 9  | 2175 | 12 |
| 体外受精 | 新鲜周期 | 1 | 短效长方案 | 达必佳(短效)  | 1400  | 8  | 1350 | 6  |
| 体外受精 | 新鲜周期 | 1 | 短效长方案 | 达菲林(短效), | 1275  | 10 | 975  | 7  |
| 体外受精 | 新鲜周期 | 1 | 短效长方案 | 达菲林(短效), | 1500  | 10 | 750  | 10 |
| 体外受精 | 新鲜周期 | 1 | 短效长方案 | 达菲林(短效), | 1350  | 10 | 1425 | 12 |
| 体外受精 | 新鲜周期 | 1 | 短效长方案 | 达必佳(短效)  | 1800  | 9  | 0    | 0  |
| 体外受精 | 新鲜周期 | 3 | 短效长方案 | 达必佳(短效)  | 1250  | 7  | 2400 | 13 |
| 体外受精 | 新鲜周期 | 2 | 短效长方案 | 达必佳(短效)  | 1125  | 8  | 225  | 2  |
| 体外受精 | 新鲜周期 | 2 | 短效长方案 | 达必佳(短效)  | 1200  | 9  | 1050 | 5  |
| 体外受精 | 新鲜周期 | 1 | 短效长方案 | 达必佳(短效)  | 1200  | 9  | 300  | 3  |
| 体外受精 | 新鲜周期 | 1 | 短效长方案 | 达菲林(短效), | 1350  | 10 | 1800 | 11 |
| 体外受精 | 新鲜周期 | 1 | 短效长方案 | 达必佳(短效)  | 1200  | 10 | 600  | 7  |
| 体外受精 | 新鲜周期 | 1 | 短效长方案 | 达菲林(短效), | 1200  | 8  | 3075 | 14 |
| 体外受精 | 新鲜周期 | 1 | 短效长方案 | 达必佳(短效)  | 1125  | 9  | 225  | 3  |
| 体外受精 | 新鲜周期 | 1 | 短效长方案 | 达必佳(短效)  | 1350  | 10 | 300  | 3  |
| 体外受精 | 新鲜周期 | 1 | 短效长方案 | 达必佳(短效)  | 1350  | 9  | 675  | 9  |
| 体外受精 | 新鲜周期 | 2 | 短效长方案 | 达必佳(短效)  | 1200  | 8  | 1650 | 8  |
| 体外受精 | 新鲜周期 | 1 | 短效长方案 | 达菲林(短效), | 1050  | 7  | 900  | 9  |
| 体外受精 | 新鲜周期 | 1 | 短效长方案 | 达必佳(短效)  | 1350  | 10 | 1425 | 11 |
| 体外受精 | 新鲜周期 | 2 | 短效长方案 | 达必佳(短效)  | 1300  | 13 | 1050 | 13 |
| 体外受精 | 新鲜周期 | 2 | 短效长方案 | 达必佳(短效)  | 0     | 0  | 5550 | 18 |
| 体外受精 | 新鲜周期 | 1 | 短效长方案 | 达菲林(短效), | 900   | 6  | 750  | 4  |
| 体外受精 | 新鲜周期 | 1 | 短效长方案 | 达菲林(短效), | 1200  | 12 | 1725 | 12 |
| 体外受精 | 新鲜周期 | 2 | 短效长方案 | 达菲林(短效), | 1500  | 10 | 2325 | 12 |
| 体外受精 | 新鲜周期 | 1 | 短效长方案 | 达必佳(短效)  | 1200  | 7  | 1650 | 9  |
| 体外受精 | 新鲜周期 | 1 | 短效长方案 | 达必佳(短效)  | 862.5 | 8  | 375  | 4  |
| 体外受精 | 新鲜周期 | 1 | 短效长方案 | 达必佳(短效)  | 1250  | 8  | 1950 | 10 |
| 体外受精 | 新鲜周期 | 2 | 短效长方案 | 达必佳(短效)  | 1250  | 7  | 750  | 4  |
| 体外受精 | 新鲜周期 | 1 | 短效长方案 | 达必佳(短效)  | 1275  | 9  | 825  | 10 |
| 体外受精 | 新鲜周期 | 2 | 短效长方案 | 达菲林(短效), | 1200  | 8  | 1725 | 12 |
| 体外受精 | 新鲜周期 | 1 | 短效长方案 | 达菲林(短效), | 900   | 6  | 450  | 3  |
| 体外受精 | 新鲜周期 | 1 | 短效长方案 | 达菲林(短效), | 900   | 6  | 1800 | 11 |
| 体外受精 | 新鲜周期 | 1 | 短效长方案 | 达必佳(短效)  | 900   | 8  | 150  | 4  |
| 体外受精 | 新鲜周期 | 1 | 短效长方案 | 达菲林(短效), | 1400  | 7  | 450  | 3  |
| 体外受精 | 新鲜周期 | 1 | 短效长方案 | 达菲林(短效), | 1050  | 7  | 600  | 4  |
| 体外受精 | 新鲜周期 | 1 | 短效长方案 | 达菲林(短效), | 1350  | 10 | 2325 | 12 |

|      |      |   |       |          |       |    |      |    |
|------|------|---|-------|----------|-------|----|------|----|
| 体外受精 | 新鲜周期 | 2 | 短效长方案 | 达必佳(短效)  | 1350  | 11 | 2925 | 13 |
| 体外受精 | 新鲜周期 | 1 | 短效长方案 | 达菲林(短效), | 1200  | 10 | 2325 | 11 |
| 体外受精 | 新鲜周期 | 1 | 短效长方案 | 达菲林(短效), | 1350  | 9  | 1725 | 12 |
| 体外受精 | 新鲜周期 | 1 | 短效长方案 | 达菲林(短效), | 900   | 6  | 1725 | 5  |
| 体外受精 | 新鲜周期 | 1 | 短效长方案 | 达菲林(短效), | 1200  | 9  | 825  | 9  |
| 体外受精 | 新鲜周期 | 1 | 短效长方案 | 达菲林(短效), | 1500  | 10 | 2100 | 14 |
| 体外受精 | 新鲜周期 | 1 | 短效长方案 | 达菲林(短效), | 1350  | 10 | 525  | 4  |
| 体外受精 | 新鲜周期 | 1 | 短效长方案 | 达必佳(短效)  | 450   | 3  | 0    | 0  |
| 体外受精 | 新鲜周期 | 2 | 短效长方案 | 达菲林(短效), | 1200  | 8  | 1875 | 14 |
| 体外受精 | 新鲜周期 | 1 | 短效长方案 | 达菲林(短效), | 1900  | 11 | 1200 | 12 |
| 体外受精 | 新鲜周期 | 1 | 短效长方案 | 达菲林(短效), | 1200  | 8  | 4875 | 20 |
| 体外受精 | 新鲜周期 | 1 | 短效长方案 | 达必佳(短效)  | 1800  | 9  | 0    | 0  |
| 体外受精 | 新鲜周期 | 1 | 短效长方案 | 达菲林(短效), | 1050  | 7  | 600  | 2  |
| 体外受精 | 新鲜周期 | 1 | 短效长方案 | 达菲林(短效), | 1125  | 9  | 675  | 6  |
| 体外受精 | 新鲜周期 | 2 | 短效长方案 | 达菲林(短效), | 1200  | 9  | 225  | 3  |
| 体外受精 | 新鲜周期 | 1 | 短效长方案 | 达菲林(短效), | 1350  | 10 | 2775 | 14 |
| 体外受精 | 新鲜周期 | 3 | 短效长方案 | 达必佳(短效)  | 900   | 6  | 2625 | 11 |
| 体外受精 | 新鲜周期 | 1 | 短效长方案 | 达菲林(短效), | 1050  | 7  | 225  | 3  |
| 体外受精 | 新鲜周期 | 1 | 短效长方案 | 达必佳(短效)  | 937.5 | 7  | 900  | 6  |
| 体外受精 | 新鲜周期 | 2 | 短效长方案 | 达必佳(短效)  | 937.5 | 7  | 2100 | 12 |
| 体外受精 | 新鲜周期 | 1 | 短效长方案 | 达菲林(短效), | 0     | 0  | 4500 | 12 |
| 体外受精 | 新鲜周期 | 1 | 短效长方案 | 达菲林(短效), | 525   | 7  | 3825 | 14 |
| 体外受精 | 新鲜周期 | 1 | 短效长方案 | 达必佳(短效)  | 1350  | 9  | 675  | 9  |
| 体外受精 | 新鲜周期 | 1 | 短效长方案 | 达必佳(短效)  | 937.5 | 7  | 900  | 8  |
| 体外受精 | 新鲜周期 | 2 | 短效长方案 | 达必佳(短效)  | 1500  | 11 | 0    | 0  |
| 体外受精 | 新鲜周期 | 1 | 短效长方案 | 达菲林(短效), | 1050  | 8  | 300  | 3  |
| 体外受精 | 新鲜周期 | 1 | 短效长方案 | 达菲林(短效), | 2200  | 11 | 0    | 0  |



| (Gn启动)药品  | (Gn启动)剂量 | Gn启动)总剂量 | Gn启动)总天数 | (启动)时间(G   | GnE2  | GnLH | GnFSH | 备调节启动)药 |
|-----------|----------|----------|----------|------------|-------|------|-------|---------|
| 普丽康       | 200      | 2450     | 12       | 2014-04-01 | 31.00 | 1.47 | 6.84  | 达必佳(短效) |
| HMG,普丽康,达 | 350      | 3850     | 11       | 2014-06-27 | 28.00 | 1.85 | 4.02  | 达必佳(短效) |
| 果纳芬       | 150      | 1725     | 10       | 2014-08-13 | 34.00 | 2.82 | 5.66  | 达必佳(短效) |
| HMG,普丽康,达 | 350      | 3500     | 10       | 2014-07-18 | 35.00 | 1.53 | 5.31  | 达菲林(长效) |
| HMG,普丽康   | 400      | 4400     | 11       | 2014-08-27 | 33.00 | 2.25 | 1.34  | 达必佳(短效) |
| HMG,果纳芬   | 375      | 3000     | 8        | 2014-09-05 | 20.00 | 1.24 | 6.90  | 达菲林(短效) |
| HMG,果纳芬,达 | 300      | 3300     | 10       | 2014-10-22 | 40.00 | 1.30 | 4.93  | 达菲林(短效) |
| 果纳芬       | 150      | 1350     | 9        | 2015-08-27 | 15.00 | 1.40 | 4.16  | 达必佳(短效) |
| 普丽康       | 150      | 1875     | 10       | 2016-07-08 | 22.00 | 3.71 | 4.51  | 达必佳(短效) |
| HMG,果纳芬   | 300      | 3825     | 11       | 2015-07-02 | 29.00 | 1.08 | 4.50  | 达必佳(短效) |
| 普丽康       | 200      | 2250     | 12       | 2015-03-02 | 19.00 | 1.93 | 4.33  | 达菲林(短效) |
| HMG,普丽康   | 275      | 4025     | 13       | 2015-06-08 | 12.00 | 0.91 | 3.60  | 达菲林(短效) |
| 果纳芬       | 150      | 2400     | 13       | 2015-07-14 | 15.00 | 1.52 | 4.93  | 达菲林(短效) |
| 果纳芬       | 150      | 4950     | 18       | 2015-05-26 | 18.00 | 1.81 | 2.26  | 达必佳(短效) |
| 普丽康       | 100      | 1375     | 10       | 2015-07-10 | 21.00 | 1.51 | 2.97  | 达菲林(短效) |
| 普丽康       | 100      | 1400     | 12       | 2015-05-26 | 12.00 | 1.74 | 1.65  | 达必佳(短效) |
| 果纳芬       | 150      | 2100     | 12       | 2015-06-10 | 13.00 | 1.39 | 3.89  | 达菲林(短效) |
| 果纳芬       | 150      | 2475     | 15       |            | 16.00 | 0.95 | 1.98  | 达菲林(短效) |
| HMG,普丽康   | 275      | 3575     | 12       | 2015-06-23 | 19.00 | 1.41 | 4.16  | 达必佳(短效) |
| 普丽康       | 100      | 1950     | 14       | 2015-06-23 | 14.00 | 0.98 | 3.01  | 达必佳(短效) |
| 果纳芬       | 150      | 2100     | 14       | 2015-12-10 | 47.00 | 1.10 | 3.90  | 达必佳(短效) |
| 普丽康       | 200      | 4700     | 15       | 2015-09-25 | 26.00 | 1.39 | 3.79  | 达必佳(短效) |
| 果纳芬       | 112.5    | 1350     | 10       | 2015-06-16 | 9.00  | 1.73 | 3.24  | 达菲林(短效) |
| 果纳芬       | 150      | 1500     | 10       | 2015-06-16 | 43.00 | 1.73 | 4.27  | 达菲林(短效) |
| 普丽康       | 200      | 3275     | 13       | 2015-06-23 | 23.00 | 0.95 | 1.91  | 达必佳(短效) |
| 普丽康       | 150      | 4875     | 19       | 2015-08-27 | 17.00 | 0.85 | 3.80  | 达菲林(短效) |
| 普丽康       | 200      | 2600     | 12       | 2015-06-04 | 20.00 | 1.80 | 4.24  | 达必佳(短效) |
| 果纳芬       | 75       | 1612.5   | 13       | 2015-06-18 | 28.00 | 1.47 | 3.12  | 达必佳(短效) |
| 果纳芬       | 75       | 1875     | 12       | 2015-06-18 | 27.00 | 1.58 | 3.27  | 达必佳(短效) |
| 普丽康       | 200      | 2500     | 12       | 2015-07-22 | 21.00 | 1.31 | 2.98  | 达菲林(短效) |
| HMG,普丽康   | 275      | 3025     | 11       | 2015-07-03 | 13.00 | 1.54 | 3.30  | 达菲林(短效) |
| HMG,普丽康   | 350      | 3500     | 10       | 2015-07-24 | 11.00 | 1.44 | 4.08  | 达菲林(短效) |
| 普丽康       | 200      | 2575     | 12       | 2015-07-17 | 32.00 | 1.53 | 4.81  | 达菲林(短效) |
| 普丽康       | 100      | 1225     | 10       |            | 14.00 | 1.14 | 1.84  |         |
| HMG,果纳芬   | 112.5    | 1650     | 13       | 2015-06-18 | 33.00 | 1.17 | 2.41  | 达菲林(短效) |
| 果纳芬       | 150      | 2400     | 13       | 2015-07-23 | 10.00 | 1.71 | 3.12  | 达菲林(短效) |
| 普丽康       | 200      | 3925     | 16       | 2015-07-06 | 9.00  | 0.95 | 4.19  | 达菲林(短效) |
| 普丽康       | 150      | 1350     | 10       | 2015-08-18 | 20.00 | 1.58 | 2.90  | 达菲林(短效) |
| 普丽康       | 100      | 2075     | 12       | 2015-06-23 | 25.00 | 1.75 | 5.47  | 达必佳(短效) |
| 普丽康       | 100      | 2050     | 13       | 2015-06-29 | 29.00 | 1.72 | 2.92  | 达菲林(短效) |
| 普丽康       | 150      | 2000     | 12       | 2015-06-26 | 15.00 | 2.05 | 2.63  | 达菲林(短效) |
| 果纳芬       | 150      | 2625     | 16       | 2015-07-22 | 11.00 | 1.49 | 4.17  | 达菲林(短效) |
| 果纳芬       | 150      | 2250     | 13       | 2015-07-13 | 10.00 | 2.58 | 3.98  | 达菲林(短效) |
| 果纳芬       | 150      | 2550     | 15       | 2015-07-06 | 22.00 | 1.53 | 2.16  | 达菲林(短效) |
| 果纳芬       | 150      | 1200     | 8        | 2015-07-13 | 36.00 | 1.85 | 4.54  | 达菲林(短效) |
| 普丽康       | 200      | 2050     | 10       | 2015-08-21 | 28.00 | 1.21 | 3.09  | 达菲林(短效) |
| 果纳芬       | 150      | 8775     | 23       | 2015-07-08 | 32.00 | 1.49 | 3.40  | 达必佳(短效) |
| 果纳芬       | 150      | 4200     | 18       | 2015-07-22 | 24.00 | 1.22 | 4.24  | 达菲林(短效) |
| HMG,果纳芬   | 187.5    | 1875     | 10       | 2013-11-25 | 13.00 | 2.19 | 5.10  | 达必佳(短效) |

|           |       |        |    |            |       |      |      |         |
|-----------|-------|--------|----|------------|-------|------|------|---------|
| 果纳芬       | 150   | 1800   | 12 | 2015-07-13 | 11.00 | 3.26 | 5.11 | 达菲林(短效) |
| 果纳芬       | 150   | 1687.5 | 11 | 2015-08-12 | 11.00 | 1.70 | 2.81 | 达菲林(短效) |
| 果纳芬       | 150   | 1950   | 13 | 2015-08-03 | 20.00 | 2.99 | 4.46 | 达菲林(短效) |
| 普丽康       | 200   | 2900   | 14 | 2015-11-05 | 14.00 | 2.89 | 5.19 | 达菲林(短效) |
| 普丽康       | 150   | 1575   | 11 | 2015-08-21 | 44.00 | 3.49 | 2.78 | 达菲林(短效) |
| 普丽康       | 150   | 1500   | 11 | 2015-08-18 | 15.00 | 1.32 | 4.08 | 达菲林(短效) |
|           | 0     | 3150   | 14 | 2015-07-24 | 6.00  | 2.99 | 4.22 | 达菲林(短效) |
| 果纳芬       | 150   | 2325   | 12 | 2015-09-07 | 23.00 | 3.65 | 2.34 | 达必佳(短效) |
| 普丽康       | 200   | 2775   | 13 | 2015-07-21 | 13.00 | 0.83 | 4.20 | 达必佳(短效) |
| 果纳芬       | 150   | 6300   | 21 | 2015-07-22 | 23.00 | 2.42 | 2.75 | 达菲林(短效) |
| 普丽康       | 150   | 2025   | 12 | 2015-08-17 | 20.00 | 0.96 | 2.11 | 达菲林(短效) |
| 普丽康       | 150   | 1500   | 10 | 2015-08-24 | 15.00 | 1.49 | 5.09 | 达菲林(短效) |
| 果纳芬       | 150   | 2100   | 12 | 2015-07-27 | 26.00 | 2.28 | 4.15 | 达菲林(短效) |
| 普丽康       | 150   | 2325   | 12 | 2015-08-21 | 18.00 | 1.21 | 2.46 | 达菲林(短效) |
| 果纳芬       | 150   | 2550   | 13 | 2015-09-16 | 22.00 | 1.68 | 3.85 | 达菲林(短效) |
| 普丽康       | 200   | 1950   | 10 | 2015-08-17 | 35.00 | 2.00 | 3.20 | 达菲林(短效) |
| 普丽康       | 200   | 2350   | 11 | 2015-08-27 | 16.00 | 1.05 | 3.55 | 达菲林(短效) |
| 普丽康       | 200   | 2800   | 12 | 2015-09-11 | 46.00 | 0.89 | 1.76 | 达菲林(短效) |
| 普丽康       | 200   | 1900   | 9  | 2015-07-24 | 25.00 | 4.02 | 1.41 | 达菲林(短效) |
| HMG,普丽康   | 225   | 1800   | 8  | 2015-08-21 | 24.00 | 1.74 | 4.58 | 达菲林(短效) |
| 普丽康       | 150   | 1625   | 10 | 2015-09-14 | 13.00 | 3.81 | 4.94 | 达菲林(短效) |
| 普丽康       | 150   | 2550   | 14 | 2015-08-13 | 18.00 | 1.47 | 3.45 | 达菲林(短效) |
| 果纳芬       | 150   | 1950   | 12 | 2015-09-02 | 13.00 | 1.86 | 3.52 | 达菲林(短效) |
| 普丽康       | 150   | 1475   | 10 | 2015-08-24 | 22.00 | 1.60 | 3.08 | 达菲林(短效) |
| 普丽康       | 150   | 1800   | 12 | 2015-09-11 | 14.00 | 1.05 | 2.19 | 达菲林(短效) |
| 果纳芬       | 150   | 1650   | 11 | 2015-08-19 | 16.00 | 1.66 | 2.55 | 达菲林(短效) |
| 普丽康       | 200   | 2100   | 11 | 2015-08-24 | 16.00 | 1.48 | 4.97 | 达必佳(短效) |
| 普丽康       | 150   | 1800   | 13 | 2015-08-18 | 23.00 | 1.39 | 3.48 | 达必佳(短效) |
| 普丽康       | 200   | 2725   | 13 | 2015-09-02 | 15.00 | 2.24 | 3.46 | 达菲林(短效) |
| 普丽康       | 150   | 1875   | 11 | 2015-08-25 | 18.00 | 3.19 | 3.86 | 达菲林(短效) |
| HMG       | 225   | 1800   | 7  | 2015-10-08 | 46.00 | 1.80 | 3.27 | 达必佳(短效) |
| HMG,果纳芬   | 187.5 | 2437.5 | 14 | 2015-09-11 | 15.00 | 1.51 | 2.13 | 达菲林(短效) |
| HMG,普丽康   | 175   | 2250   | 14 | 2015-09-16 | 28.00 | 2.17 | 4.29 | 达菲林(长效) |
| 普丽康       | 150   | 1350   | 9  | 2015-09-25 | 42.00 | 1.47 | 3.47 | 达必佳(短效) |
| 普丽康       | 200   | 1625   | 9  | 2015-08-25 | 27.00 | 1.95 | 3.50 | 达菲林(短效) |
| 果纳芬       | 150   | 2100   | 11 | 2015-08-27 | 16.00 | 1.05 | 3.43 | 达菲林(短效) |
| 丽申宝       | 225   | 3075   | 13 | 2015-10-15 | 38.00 | 1.24 | 2.95 | 达菲林(短效) |
| 丽申宝       | 225   | 3150   | 13 | 2015-10-13 | 19.00 | 1.75 | 3.32 | 达必佳(短效) |
| HMG,果纳芬,普 | 300   | 2700   | 9  | 2015-08-12 | 11.00 | 2.19 | 3.38 | 达必佳(短效) |
| 果纳芬       | 150   | 2625   | 13 | 2015-08-31 | 15.00 | 1.64 | 2.48 | 达菲林(短效) |
| 果纳芬       | 150   | 1500   | 10 | 2015-10-20 | 31.00 | 2.36 | 5.01 | 达必佳(短效) |
| 丽申宝       | 150   | 1050   | 7  | 2015-10-16 | 27.00 | 1.70 | 4.06 | 达必佳(短效) |
| 丽申宝       | 150   | 1500   | 10 | 2015-09-29 | 13.00 | 1.65 | 2.13 | 达必佳(短效) |
| 果纳芬       | 150   | 1650   | 11 | 2015-09-07 | 28.00 | 1.72 | 5.39 | 达菲林(短效) |
| 普丽康       | 200   | 2675   | 12 | 2015-09-28 | 13.00 | 1.92 | 2.02 | 达菲林(短效) |
| 丽申宝       | 150   | 2250   | 13 | 2015-10-12 | 23.00 | 1.76 | 3.15 | 达必佳(短效) |
| 丽申宝       | 150   | 1650   | 11 | 2015-10-16 | 17.00 | 1.58 | 3.59 | 达必佳(短效) |
| 普丽康       | 150   | 1650   | 11 | 2015-09-29 | 21.00 | 1.48 | 2.57 | 达菲林(短效) |
| 果纳芬       | 150   | 4350   | 18 | 2015-11-23 | 39.00 | 0.85 | 3.52 | 达菲林(短效) |
| 普丽康       | 200   | 3600   | 14 | 2015-09-16 | 19.00 | 2.58 | 5.02 | 达菲林(短效) |

|         |       |        |    |            |       |      |      |         |
|---------|-------|--------|----|------------|-------|------|------|---------|
| 普丽康     | 150   | 1650   | 11 | 2015-09-28 | 13.00 | 4.61 | 4.13 | 达必佳(短效) |
| 普丽康     | 150   | 1800   | 12 | 2016-05-26 | 16.00 | 1.16 | 2.64 | 达必佳(短效) |
| 普丽康     | 100   | 1650   | 12 | 2015-12-10 | 38.00 | 1.12 | 3.64 | 达菲林(短效) |
| 丽申宝     | 225   | 2925   | 13 | 2015-09-28 | 34.00 | 3.01 | 4.03 | 达菲林(短效) |
| 果纳芬     | 150   | 1500   | 10 | 2015-09-03 | 15.00 | 1.42 | 4.83 | 达菲林(长效) |
| 果纳芬     | 112.5 | 4350   | 18 | 2015-10-29 | 30.00 | 3.59 | 4.07 | 达必佳(短效) |
| 果纳芬     | 150   | 1800   | 12 | 2015-10-26 | 21.00 | 1.82 | 2.44 | 达必佳(短效) |
| 普丽康     | 200   | 2300   | 11 | 2015-09-23 | 22.00 | 1.23 | 3.19 | 达必佳(短效) |
| 丽申宝     | 150   | 3000   | 15 | 2015-10-12 | 28.00 | 4.63 | 5.12 | 达必佳(短效) |
| 丽申宝     | 150   | 1650   | 11 | 2015-10-12 | 23.00 | 1.35 | 3.55 | 达必佳(短效) |
| 丽申宝     | 225   | 2250   | 10 | 2015-10-15 | 22.00 | 1.63 | 3.50 | 达必佳(短效) |
| 果纳芬     | 112.5 | 1425   | 11 | 2015-10-22 | 16.00 | 2.08 | 4.01 | 达必佳(短效) |
| 丽申宝     | 150   | 4950   | 16 | 2015-10-13 | 28.00 | 1.47 | 3.46 | 达必佳(短效) |
| 丽申宝     | 150   | 2400   | 14 | 2015-10-13 | 30.00 | 1.30 | 3.67 | 达菲林(长效) |
| 普丽康     | 200   | 3000   | 11 | 2015-11-19 | 18.00 | 1.79 | 2.94 | 达菲林(短效) |
| 丽申宝     | 150   | 2175   | 12 | 2015-10-08 | 25.00 | 1.71 | 2.96 | 达必佳(短效) |
| HMG,丽申宝 | 112.5 | 2587.5 | 15 | 2015-10-09 | 29.00 | 1.65 | 3.30 | 达必佳(短效) |
| 丽申宝     | 225   | 2475   | 11 | 2015-09-30 | 17.00 | 0.98 | 4.66 | 达必佳(短效) |
| 普丽康     | 100   | 1450   | 10 | 2015-09-23 | 19.00 | 1.68 | 4.95 | 达菲林(短效) |
| 丽申宝     | 150   | 1350   | 9  | 2015-10-23 | 24.00 | 1.54 | 6.56 | 达菲林(短效) |
| 果纳芬     | 150   | 1950   | 13 | 2015-11-04 | 27.00 | 1.60 | 3.29 | 达必佳(短效) |
| 丽申宝     | 150   | 1800   | 12 | 2015-11-11 | 44.00 | 1.67 | 3.30 | 达必佳(短效) |
| 普丽康     | 200   | 2450   | 12 | 2015-11-04 | 13.00 | 2.04 | 4.52 | 达必佳(短效) |
| 果纳芬     | 150   | 1350   | 9  | 2015-10-24 | 26.00 | 3.35 | 5.11 | 达必佳(短效) |
| 普丽康     | 200   | 2662.5 | 13 | 2015-10-20 | 35.00 | 1.74 | 4.55 | 达必佳(短效) |
| 普丽康     | 100   | 2200   | 12 | 2015-11-06 | 28.00 | 1.39 | 2.55 | 达必佳(短效) |
| 果纳芬     | 112.5 | 1012.5 | 9  | 2015-10-26 | 31.00 | 2.82 | 4.21 | 达必佳(短效) |
| 普丽康     | 100   | 2175   | 14 | 2015-11-23 | 22.00 | 1.45 | 2.35 | 达必佳(短效) |
| HMG,普丽康 | 225   | 2925   | 13 | 2015-10-29 | 30.00 | 0.92 | 4.04 | 达必佳(短效) |
| 果纳芬     | 150   | 1800   | 12 | 2015-11-04 | 39.00 | 1.53 | 4.41 | 达必佳(短效) |
| 果纳芬     | 150   | 3675   | 16 | 2015-11-17 | 38.00 | 1.35 | 3.54 | 达菲林(短效) |
| HMG,果纳芬 | 225   | 2025   | 9  | 2015-12-08 | 25.00 | 1.47 | 4.31 | 达必佳(短效) |
| HMG,丽申宝 | 225   | 2925   | 13 | 2015-12-03 | 31.00 | 1.10 | 3.70 | 达必佳(短效) |
| 普丽康     | 150   | 1500   | 10 | 2015-11-05 | 33.00 | 2.47 | 5.00 | 达菲林(短效) |
| 果纳芬     | 150   | 1500   | 10 | 2015-11-11 | 13.00 | 2.13 | 4.47 | 达菲林(短效) |
| 普丽康     | 150   | 1575   | 11 | 2015-11-04 | 27.00 | 2.32 | 2.94 | 达必佳(短效) |
| 果纳芬     | 150   | 1650   | 11 | 2015-11-12 | 33.00 | 1.56 | 3.43 | 达必佳(短效) |
| 丽申宝     | 225   | 2925   | 13 | 2015-12-09 | 50.00 | 1.26 | 4.29 | 达必佳(短效) |
| 果纳芬     | 112.5 | 2775   | 13 | 2015-11-24 | 31.00 | 1.58 | 3.15 | 达必佳(短效) |
| 普丽康     | 150   | 2250   | 14 | 2015-11-06 | 50.00 | 1.65 | 5.03 | 达菲林(短效) |
|         | 0     | 2325   | 11 | 2015-12-14 | 47.00 | 2.47 | 4.22 | 达菲林(短效) |
| 果纳芬,丽申宝 | 225   | 1500   | 7  | 2015-12-11 | 41.00 | 2.69 | 5.49 | 达菲林(短效) |
| 丽申宝     | 150   | 3000   | 15 | 2015-10-30 | 27.00 | 2.30 | 5.29 | 达必佳(短效) |
| 果纳芬     | 150   | 1650   | 12 | 2015-12-24 | 24.00 | 1.90 | 4.55 | 达必佳(短效) |
| 果纳芬     | 150   | 1800   | 12 | 2015-12-02 | 43.00 | 2.36 | 4.46 | 达必佳(短效) |
| 丽申宝     | 150   | 2400   | 14 | 2015-11-26 | 50.00 | 2.33 | 4.74 | 达菲林(短效) |
| 普丽康     | 150   | 1875   | 12 | 2015-12-24 | 35.00 | 3.37 | 5.83 | 达必佳(短效) |
| 果纳芬     | 150   | 3600   | 13 | 2015-12-03 | 30.00 | 0.90 | 2.65 | 达必佳(短效) |
| 果纳芬     | 150   | 1350   | 10 | 2015-11-17 | 30.00 | 1.68 | 2.92 | 达必佳(短效) |
| 果纳芬     | 150   | 1800   | 12 | 2015-12-08 | 26.00 | 1.80 | 3.66 | 达必佳(短效) |

|         |       |        |    |            |       |      |      |         |
|---------|-------|--------|----|------------|-------|------|------|---------|
| HMG,普丽康 | 137.5 | 2212.5 | 14 | 2015-12-14 | 34.00 | 2.28 | 4.37 | 达菲林(短效) |
| 果纳芬     | 150   | 1500   | 10 | 2015-12-24 | 24.00 | 4.48 | 3.08 | 达必佳(短效) |
| HMG,果纳芬 | 150   | 2662.5 | 16 | 2015-12-29 | 48.00 | 1.91 | 5.40 | 达必佳(短效) |
| 丽申宝     | 150   | 4200   | 15 | 2015-12-04 | 46.00 | 1.79 | 2.88 | 达菲林(短效) |
| 普丽康     | 150   | 2325   | 12 | 2015-12-17 | 36.00 | 2.22 | 5.41 | 达必佳(短效) |
| 果纳芬     | 150   | 1650   | 11 | 2015-12-03 | 42.00 | 1.70 | 4.30 | 达必佳(短效) |
| HMG,普丽康 | 137.5 | 2312.5 | 12 | 2015-12-18 | 50.00 | 1.21 | 3.16 | 达必佳(短效) |
|         | 0     | 1337.5 | 10 | 2015-12-02 | 36.00 | 2.69 | 4.36 | 达必佳(短效) |
| 丽申宝     | 150   | 1875   | 12 | 2015-12-12 | 14.00 | 1.84 | 2.95 | 达必佳(短效) |
| 普丽康     | 200   | 2250   | 11 | 2015-12-03 | 36.00 | 1.25 | 2.98 | 达必佳(短效) |
| 丽申宝     | 150   | 1425   | 10 | 2015-12-31 | 42.00 | 2.38 | 3.73 | 达必佳(短效) |
| 果纳芬     | 150   | 1350   | 9  | 2015-12-24 | 17.00 | 1.38 | 2.36 | 达必佳(短效) |
| HMG,果纳芬 | 225   | 2475   | 11 | 2015-12-18 | 18.00 | 1.80 | 3.00 | 达必佳(短效) |
| 普丽康     | 150   | 1500   | 10 | 2015-12-07 | 45.00 | 2.51 | 4.27 | 达必佳(短效) |
| 普丽康     | 200   | 2125   | 10 | 2015-12-07 | 24.00 | 1.83 | 3.37 | 达必佳(短效) |
| HMG,普丽康 | 425   | 2550   | 6  | 2015-12-04 | 15.00 | 1.61 | 1.15 | 达菲林(短效) |
| 果纳芬     | 150   | 1575   | 10 | 2015-12-16 | 43.00 | 2.67 | 5.79 | 达菲林(短效) |
| 丽申宝     | 150   | 1500   | 10 | 2015-12-09 | 38.00 | 3.35 | 2.42 | 达菲林(短效) |
| 普丽康     | 200   | 2900   | 14 | 2015-12-24 | 18.00 | 1.61 | 3.71 | 达菲林(短效) |
| 果纳芬     | 150   | 1950   | 13 | 2015-12-17 | 19.00 | 1.47 | 5.59 | 达必佳(短效) |
| 丽申宝     | 150   | 2925   | 14 | 2015-12-02 | 31.00 | 0.90 | 4.98 | 达必佳(短效) |
| 普丽康     | 200   | 2175   | 11 | 2016-01-03 | 48.00 | 1.46 | 3.19 | 达必佳(短效) |
| 果纳芬     | 150   | 1500   | 11 | 2015-12-18 | 20.00 | 1.84 | 4.28 | 达必佳(短效) |
| 果纳芬     | 150   | 1500   | 10 | 2015-12-22 | 19.00 | 2.79 | 5.08 | 达必佳(短效) |
| HMG,普丽康 | 175   | 1550   | 9  | 2015-12-29 | 42.00 | 1.59 | 4.84 | 达必佳(短效) |
| 丽申宝     | 150   | 1650   | 11 | 2015-12-21 | 17.00 | 1.45 | 4.57 | 达菲林(短效) |
| 普丽康     | 200   | 2450   | 11 | 2016-01-03 | 11.00 | 4.88 | 5.16 | 达必佳(短效) |
| HMG,普丽康 | 137.5 | 1275   | 9  | 2015-12-29 | 21.00 | 1.06 | 3.31 | 达必佳(短效) |
| 普丽康     | 200   | 3650   | 14 | 2015-12-25 | 18.00 | 1.34 | 3.52 | 达必佳(短效) |
| 果纳芬     | 150   | 5945   | 15 | 2016-01-02 | 39.00 | 1.50 | 3.00 | 达必佳(短效) |
| 果纳芬     | 150   | 1800   | 10 | 2016-03-01 | 11.00 | 1.62 | 3.86 | 达必佳(短效) |
| 果纳芬,贺美奇 | 300   | 4125   | 12 | 2016-01-01 | 10.00 | 1.57 | 4.95 | 达菲林(短效) |
| 果纳芬     | 150   | 4500   | 15 | 2016-02-14 | 15.00 | 1.43 | 3.93 | 达菲林(短效) |
| 普丽康     | 200   | 2400   | 11 | 2016-02-19 | 16.00 | 1.73 | 4.21 | 达菲林(短效) |
| 普丽康     | 200   | 2375   | 11 | 2016-02-14 | 16.00 | 2.17 | 5.02 | 达菲林(短效) |
| 果纳芬     | 150   | 750    | 5  | 2016-02-12 | 21.00 | 1.00 | 2.92 | 达菲林(短效) |
| 丽申宝     | 150   | 1650   | 11 | 2016-03-12 | 48.00 | 2.90 | 5.77 | 达必佳(短效) |
| 果纳芬     | 150   | 1800   | 12 | 2016-02-01 | 27.00 | 1.46 | 1.33 | 达菲林(短效) |
| 普丽康     | 200   | 2700   | 13 | 2016-03-01 | 18.00 | 1.90 | 5.45 | 达必佳(短效) |
| HMG,果纳芬 | 300   | 3750   | 11 | 2016-02-03 | 19.00 | 1.79 | 3.15 | 达必佳(短效) |
| 果纳芬     | 150   | 3675   | 18 | 2016-03-01 | 24.00 | 4.19 | 4.22 | 达必佳(短效) |
| 果纳芬     | 150   | 3600   | 17 | 2016-03-04 | 40.00 | 2.50 | 5.00 | 达必佳(短效) |
| 丽申宝     | 150   | 2550   | 12 | 2016-03-07 | 35.00 | 2.53 | 4.70 | 达必佳(短效) |
| 普丽康     | 200   | 2450   | 12 | 2016-03-01 | 12.00 | 1.79 | 3.88 | 达必佳(短效) |
| 果纳芬     | 112.5 | 1612.5 | 12 | 2016-03-09 | 30.00 | 1.79 | 2.56 | 达必佳(短效) |
| 普丽康     | 200   | 2475   | 11 | 2016-03-16 | 24.00 | 1.72 | 3.37 | 达必佳(短效) |
| 果纳芬     | 150   | 1650   | 11 | 2016-03-11 | 12.00 | 3.42 | 3.95 | 达必佳(短效) |
| 果纳芬     | 150   | 1650   | 11 | 2016-03-09 | 26.00 | 1.57 | 3.92 | 达必佳(短效) |
| 普丽康     | 200   | 6000   | 16 | 2016-03-10 | 21.00 | 1.63 | 3.80 | 达必佳(短效) |
| HMG,果纳芬 | 225   | 3000   | 12 | 2016-03-04 | 28.00 | 1.40 | 2.40 | 达必佳(短效) |

|           |       |        |    |            |       |      |      |         |
|-----------|-------|--------|----|------------|-------|------|------|---------|
| HMG,果纳芬   | 187.5 | 4312.5 | 14 | 2016-03-04 | 46.00 | 0.83 | 3.86 | 达必佳(短效) |
| 普丽康       | 150   | 1725   | 11 | 2016-04-14 | 19.00 | 3.40 | 3.34 | 达必佳(短效) |
| HMG,普丽康   | 275   | 2625   | 10 | 2016-06-21 | 17.00 | 0.96 | 5.81 | 达必佳(短效) |
| 果纳芬       | 150   | 2700   | 17 | 2016-03-03 | 21.00 | 1.68 | 5.24 | 达必佳(短效) |
| 丽申宝       | 150   | 1800   | 12 | 2016-03-25 | 38.00 | 1.52 | 3.89 | 达必佳(短效) |
| 果纳芬       | 150   | 1350   | 9  | 2016-03-07 | 15.00 | 1.40 | 4.16 | 达必佳(短效) |
| 普丽康       | 200   | 2250   | 11 | 2016-03-23 | 25.00 | 1.95 | 3.00 | 达必佳(短效) |
| HMG,普丽康   | 175   | 1975   | 10 | 2016-05-13 | 39.00 | 1.69 | 3.33 | 达必佳(短效) |
| HMG,普丽康   | 275   | 2700   | 8  | 2016-03-11 | 39.00 | 1.70 | 4.10 | 达必佳(短效) |
| 丽申宝       | 225   | 2250   | 10 | 2016-03-31 | 50.00 | 1.53 | 2.77 | 达菲林(短效) |
| HMG,普丽康   | 350   | 3400   | 9  | 2016-03-14 | 27.00 | 1.77 | 3.37 | 达必佳(短效) |
| 丽申宝       | 225   | 5250   | 15 | 2016-03-16 | 16.00 | 1.47 | 3.05 | 达必佳(短效) |
| HMG,普丽康   | 350   | 3500   | 10 | 2016-03-16 | 14.00 | 1.17 | 1.21 | 达菲林(短效) |
| 丽申宝       | 150   | 3112.5 | 13 | 2016-03-31 | 12.00 | 1.48 | 3.69 | 达菲林(短效) |
| HMG,普丽康,H | 375   | 1950   | 10 | 2016-03-23 | 22.00 | 4.36 | 2.44 | 达必佳(短效) |
| 普丽康       | 150   | 2175   | 11 | 2016-04-11 | 43.00 | 2.15 | 1.59 | 达必佳(短效) |
| HMG,丽申宝   | 300   | 2700   | 9  | 2016-03-23 | 27.00 | 1.53 | 3.76 | 达必佳(短效) |
| 丽申宝       | 225   | 3900   | 12 | 2016-04-06 | 17.00 | 2.96 | 4.99 | 达必佳(短效) |
| 普丽康       | 200   | 1875   | 10 | 2016-04-13 | 47.00 | 1.73 | 3.52 | 达必佳(短效) |
| 果纳芬       | 150   | 1650   | 11 | 2016-04-12 | 30.00 | 1.70 | 3.79 | 达必佳(短效) |
| 普丽康       | 150   | 2550   | 15 | 2016-03-30 | 20.00 | 0.80 | 3.30 | 达菲林(短效) |
| 普丽康       | 150   | 1350   | 9  | 2016-04-05 | 35.00 | 1.49 | 3.61 | 达必佳(短效) |
| HMG,普丽康   | 275   | 2775   | 10 | 2016-04-06 | 18.00 | 1.62 | 3.19 | 达必佳(短效) |
|           | 0     | 1650   | 11 | 2016-04-22 | 27.00 | 2.29 | 2.65 | 达必佳(短效) |
| 果纳芬       | 150   | 2925   | 15 | 2016-05-11 | 25.00 | 1.40 | 2.96 | 达必佳(短效) |
| 普丽康       | 200   | 1950   | 10 | 2016-04-20 | 24.00 | 1.08 | 3.25 | 达菲林(短效) |
| 果纳芬       | 150   | 2550   | 13 | 2016-05-05 | 42.00 | 1.94 | 2.67 | 达必佳(短效) |
| HMG,普丽康   | 225   | 2025   | 10 | 2016-06-08 | 36.00 | 1.25 | 4.16 | 达必佳(短效) |
| 普丽康       | 100   | 2925   | 16 | 2016-04-26 | 15.00 | 1.01 | 2.24 | 达必佳(短效) |
| 普丽康       | 150   | 2400   | 13 | 2016-05-03 | 21.00 | 1.68 | 2.29 | 达必佳(短效) |
| 普丽康       | 150   | 7875   | 22 | 2016-05-19 | 18.00 | 1.68 | 3.79 | 达必佳(短效) |
| 普丽康       | 200   | 1700   | 10 | 2016-04-28 | 34.00 | 2.51 | 3.00 | 达必佳(短效) |
| HMG,普丽康   | 187.5 | 6750   | 20 | 2016-05-31 | 17.00 | 1.53 | 3.25 | 达必佳(短效) |
| HMG,普丽康   | 225   | 3075   | 14 | 2016-05-26 | 35.00 | 4.11 | 5.81 | 达必佳(短效) |
| HMG,果纳芬,丽 | 262.5 | 3262.5 | 12 | 2016-05-16 | 31.00 | 2.19 | 3.27 | 达必佳(短效) |
| 普丽康       | 150   | 3250   | 12 | 2017-02-22 | 19.00 | 1.66 | 3.45 | 达必佳(短效) |
| 果纳芬       | 150   | 2400   | 13 | 2016-05-04 | 18.00 | 1.71 | 4.20 | 达必佳(短效) |
| 普丽康       | 100   | 1350   | 13 | 2016-05-20 | 19.00 | 3.79 | 4.39 | 达菲林(短效) |
| 普丽康       | 150   | 2700   | 11 | 2016-05-09 | 14.00 | 1.64 | 4.52 | 达必佳(短效) |
| HMG,普丽康   | 175   | 2075   | 11 | 2016-05-05 | 17.00 | 1.99 | 2.81 | 达必佳(短效) |
| 果纳芬,丽申宝   | 225   | 1987.5 | 8  | 2016-05-09 | 18.00 | 2.37 | 3.68 | 达必佳(短效) |
| HMG,果纳芬   | 300   | 4575   | 12 | 2016-05-23 | 19.00 | 1.88 | 1.48 | 达必佳(短效) |
| 普丽康       | 200   | 2325   | 11 | 2016-05-11 | 13.00 | 1.12 | 3.74 | 达必佳(短效) |
| 普丽康       | 150   | 1350   | 9  | 2016-05-19 | 40.00 | 1.46 | 3.67 | 达菲林(短效) |
| 普丽康       | 150   | 1500   | 10 | 2016-05-13 | 39.00 | 2.27 | 3.89 | 达菲林(短效) |
| 普丽康       | 150   | 2100   | 14 | 2016-06-02 | 15.00 | 2.54 | 2.20 | 达必佳(短效) |
| 普丽康       | 150   | 1500   | 10 | 2016-06-06 | 23.00 | 1.66 | 4.35 | 达必佳(短效) |
| 果纳芬       | 150   | 4725   | 16 | 2016-06-28 | 20.00 | 1.77 | 2.98 | 达必佳(短效) |
| 普丽康       | 100   | 1100   | 9  | 2016-06-08 | 46.00 | 2.03 | 3.85 | 达必佳(短效) |
| 果纳芬       | 150   | 2175   | 12 | 2016-06-28 | 21.00 | 1.41 | 4.20 | 达必佳(短效) |

|         |       |        |    |            |       |      |      |         |
|---------|-------|--------|----|------------|-------|------|------|---------|
| 普丽康     | 150   | 5175   | 20 | 2016-06-08 | 17.00 | 1.94 | 2.96 | 达必佳(短效) |
| 普丽康     | 150   | 2100   | 14 | 2016-06-15 | 25.00 | 1.96 | 2.32 | 达必佳(短效) |
| 普丽康     | 150   | 2850   | 13 | 2016-05-25 | 23.00 | 1.99 | 4.26 | 达必佳(短效) |
| 普丽康     | 200   | 2700   | 11 | 2016-08-08 | 17.00 | 1.53 | 2.68 | 达菲林(短效) |
| HMG,普丽康 | 225   | 2475   | 11 | 2016-06-02 | 14.00 | 1.69 | 2.78 | 达必佳(短效) |
| 普丽康     | 150   | 4350   | 15 | 2016-07-06 | 17.00 | 1.08 | 4.57 | 达必佳(短效) |
| HMG,普丽康 | 275   | 2625   | 10 | 2016-06-16 | 39.00 | 1.84 | 5.40 | 达必佳(短效) |
| 普丽康     | 200   | 3450   | 12 | 2016-06-03 | 18.00 | 1.88 | 1.66 | 达必佳(短效) |
| HMG,普丽康 | 225   | 2025   | 9  | 2016-07-11 | 10.00 | 2.22 | 5.42 | 达必佳(短效) |
| HMG,普丽康 | 275   | 3975   | 13 | 2016-06-08 | 13.00 | 2.75 | 4.71 | 达必佳(短效) |
|         | 0     | 4537.5 | 15 | 2016-06-08 | 25.00 | 1.49 | 3.28 | 达必佳(短效) |
| HMG,普丽康 | 137.5 | 3412.5 | 15 | 2016-06-27 | 31.00 | 2.24 | 3.81 | 达必佳(短效) |
| HMG,普丽康 | 187.5 | 1987.5 | 10 | 2016-06-30 | 46.00 | 1.73 | 5.39 | 达必佳(短效) |
| 果纳芬     | 150   | 1800   | 12 | 2016-06-14 | 34.00 | 1.17 | 4.54 | 达必佳(短效) |
| 果纳芬     | 150   | 2475   | 13 | 2016-06-14 | 43.00 | 2.21 | 4.56 | 达必佳(短效) |
| 普丽康     | 150   | 1800   | 12 | 2016-07-22 | 14.00 | 1.41 | 3.27 | 达必佳(短效) |
| 普丽康     | 150   | 2100   | 11 | 2016-07-08 | 17.00 | 3.25 | 4.39 | 达必佳(短效) |
| 普丽康     | 200   | 1800   | 8  | 2016-07-08 | 12.00 | 1.76 | 5.62 | 达必佳(短效) |
| 普丽康     | 200   | 2350   | 11 | 2016-08-11 | 44.00 | 0.88 | 4.41 | 达菲林(短效) |
| 果纳芬     | 150   | 5325   | 20 | 2016-06-28 | 28.00 | 4.22 | 3.52 | 达必佳(短效) |
| HMG,普丽康 | 187.5 | 1950   | 10 | 2016-07-13 | 25.00 | 2.05 | 4.35 | 达必佳(短效) |
| 普丽康     | 100   | 2050   | 13 | 2016-07-07 | 13.00 | 0.91 | 1.89 | 达必佳(短效) |
| 普丽康     | 200   | 2350   | 11 | 2016-07-04 | 13.00 | 2.44 | 3.07 | 达必佳(短效) |
| 普丽康     | 150   | 2325   | 12 | 2016-07-28 | 33.00 | 1.91 | 3.57 | 达必佳(短效) |
| HMG,普丽康 | 350   | 4550   | 11 | 2016-07-26 | 16.00 | 1.40 | 3.09 | 达必佳(短效) |
| 普丽康     | 150   | 1875   | 10 | 2016-07-21 | 36.00 | 1.44 | 2.72 | 达必佳(短效) |
| 普丽康     | 150   | 2100   | 13 | 2016-07-08 | 39.00 | 1.91 | 4.72 | 达必佳(短效) |
|         | 0     | 1300   | 11 | 2016-07-28 | 32.00 | 1.62 | 3.29 | 达必佳(短效) |
| 普丽康     | 150   | 1500   | 10 | 2016-07-05 | 18.00 | 2.75 | 2.90 | 达必佳(短效) |
| 普丽康     | 200   | 2250   | 11 | 2016-07-12 | 18.00 | 1.41 | 1.90 | 达必佳(短效) |
| 普丽康     | 150   | 1950   | 12 | 2016-07-25 | 19.00 | 2.04 | 3.31 | 达必佳(短效) |
| 果纳芬     | 112.5 | 1837.5 | 13 | 2016-08-24 | 31.00 | 1.59 | 3.13 | 达必佳(短效) |
| HMG,普丽康 | 187.5 | 2205   | 11 | 2016-07-12 | 14.00 | 1.48 | 4.58 | 达必佳(短效) |
| 普丽康     | 200   | 2700   | 12 | 2016-07-26 | 22.00 | 2.15 | 4.41 | 达必佳(短效) |
| 普丽康     | 150   | 2175   | 14 | 2016-08-01 | 16.00 | 2.31 | 4.40 | 达必佳(短效) |
| 丽申宝     | 225   | 2625   | 12 | 2016-08-30 | 45.00 | 1.17 | 4.64 | 达必佳(短效) |
| HMG,普丽康 | 225   | 2100   | 10 | 2016-08-16 | 25.00 | 0.97 | 3.92 | 达必佳(短效) |
| 普丽康     | 150   | 1650   | 11 | 2016-09-01 | 17.00 | 1.66 | 3.09 | 达必佳(短效) |
| 普丽康     | 150   | 1875   | 13 | 2016-09-02 | 25.00 | 4.96 | 4.37 | 达必佳(短效) |
| 果纳芬     | 150   | 1650   | 11 | 2016-11-28 | 38.00 | 1.41 | 4.46 | 达必佳(短效) |
| 果纳芬     | 150   | 1650   | 11 | 2016-10-25 | 39.00 | 2.36 | 4.35 | 达必佳(短效) |
| 普丽康     | 150   | 2025   | 12 | 2016-08-08 | 16.00 | 0.97 | 3.40 | 达菲林(短效) |
| 普丽康     | 200   | 2875   | 12 | 2016-08-01 | 20.00 | 1.60 | 1.63 | 达必佳(短效) |
| 普丽康     | 150   | 1500   | 10 | 2016-09-02 | 16.00 | 1.67 | 3.92 | 达必佳(短效) |
| 普丽康     | 150   | 2000   | 12 | 2016-09-12 | 13.00 | 1.94 | 3.69 | 达必佳(短效) |
| HMG,果纳芬 | 225   | 2700   | 12 | 2016-08-12 | 13.00 | 1.80 | 3.56 | 达菲林(短效) |
| HMG,普丽康 | 275   | 3500   | 11 | 2016-08-04 | 25.00 | 1.88 | 3.32 | 达必佳(短效) |
| 普丽康     | 150   | 2100   | 11 | 2016-09-08 | 41.00 | 1.66 | 3.33 | 达必佳(短效) |
| HMG,果纳芬 | 225   | 3575   | 13 | 2016-08-19 | 23.00 | 2.08 | 5.34 | 达必佳(短效) |
| 普丽康     | 200   | 3100   | 11 | 2016-09-08 | 15.00 | 1.77 | 3.30 | 达必佳(短效) |

|         |       |        |    |            |       |      |      |         |
|---------|-------|--------|----|------------|-------|------|------|---------|
| 普丽康     | 150   | 2775   | 14 | 2016-09-01 | 14.00 | 2.14 | 4.45 | 达必佳(短效) |
| 普丽康     | 150   | 1800   | 11 | 2016-08-19 | 44.00 | 2.24 | 3.63 | 达必佳(短效) |
| 果纳芬     | 150   | 2100   | 11 | 2016-08-17 | 18.00 | 0.92 | 2.99 | 达菲林(短效) |
| HMG,普丽康 | 275   | 3512.5 | 14 | 2016-08-25 | 19.00 | 1.48 | 1.88 | 达必佳(短效) |
| 普丽康     | 200   | 2550   | 12 | 2016-09-06 | 34.00 | 2.29 | 5.56 | 达菲林(短效) |
| 普丽康     | 200   | 2250   | 11 | 2016-09-14 | 29.00 | 1.14 | 4.20 | 达必佳(短效) |
| HMG,普丽康 | 275   | 3025   | 11 | 2016-08-30 | 13.00 | 1.82 | 1.73 | 达菲林(短效) |
| HMG,果纳芬 | 225   | 2475   | 11 | 2016-08-29 | 19.00 | 2.16 | 3.58 | 达必佳(短效) |
| 果纳芬     | 150   | 1950   | 12 | 2016-09-16 | 31.00 | 2.15 | 3.73 | 达菲林(短效) |
| HMG,普丽康 | 175   | 1650   | 10 | 2016-10-10 | 34.00 | 2.46 | 3.61 | 达必佳(短效) |
| HMG,普丽康 | 137.5 | 2987.5 | 15 | 2016-10-19 | 18.00 | 1.79 | 1.97 | 达必佳(短效) |
| HMG,普丽康 | 275   | 2475   | 9  | 2016-09-13 | 13.00 | 1.65 | 1.57 | 达必佳(短效) |
| 果纳芬     | 150   | 3150   | 13 | 2016-11-21 | 25.00 | 1.68 | 3.59 | 达必佳(短效) |
| 普丽康     | 150   | 1725   | 11 | 2016-09-30 | 45.00 | 2.30 | 4.19 | 达必佳(短效) |
| 果纳芬     | 150   | 3000   | 13 | 2016-10-25 | 33.00 | 2.02 | 5.23 | 达必佳(短效) |
| 普丽康     | 150   | 1500   | 10 | 2016-10-07 | 32.00 | 1.38 | 2.46 | 达必佳(短效) |
| HMG,普丽康 | 225   | 2025   | 9  | 2016-10-07 | 24.00 | 1.45 | 3.36 | 达必佳(短效) |
| HMG,果纳芬 | 150   | 3075   | 15 | 2016-11-04 | 36.00 | 1.71 | 3.04 | 达菲林(短效) |
| 果纳芬     | 150   | 4500   | 16 | 2016-10-26 | 40.00 | 1.92 | 4.06 | 达必佳(短效) |
| 果纳芬     | 150   | 3825   | 18 | 2016-10-11 | 45.00 | 2.23 | 3.77 | 达必佳(短效) |
| 普丽康     | 200   | 3000   | 13 | 2016-11-15 | 23.00 | 1.52 | 4.10 | 达必佳(短效) |
| HMG,普丽康 | 137.5 | 2537.5 | 14 | 2016-10-11 | 49.00 | 2.72 | 3.55 | 达必佳(短效) |
| HMG     | 150   | 300    | 2  | 2016-11-07 | 19.00 | 1.06 | 3.20 | 达必佳(短效) |
| 果纳芬     | 150   | 1800   | 12 | 2016-10-11 | 47.00 | 2.64 | 3.27 | 达必佳(短效) |
| HMG,普丽康 | 225   | 2925   | 13 | 2016-10-12 | 12.00 | 1.17 | 3.02 | 达必佳(短效) |
| 普丽康     | 100   | 1550   | 11 | 2016-10-28 | 50.00 | 2.72 | 4.81 | 达必佳(短效) |
| HMG,果纳芬 | 300   | 3225   | 10 | 2016-10-14 | 42.00 | 1.46 | 3.79 | 达菲林(短效) |
| 普丽康     | 100   | 2025   | 12 | 2016-10-31 | 15.00 | 1.45 | 3.56 | 达菲林(短效) |
| 果纳芬     | 150   | 2100   | 11 | 2016-10-17 | 23.00 | 1.53 | 3.57 | 达必佳(短效) |
| 果纳芬     | 150   | 1350   | 9  | 2016-10-18 | 14.00 | 2.14 | 1.97 | 达菲林(短效) |
| 普丽康     | 100   | 1000   | 8  | 2016-11-03 | 39.00 | 1.04 | 3.18 | 达菲林(短效) |
| HMG,普丽康 | 225   | 4050   | 12 | 2016-12-12 | 45.00 | 1.51 | 3.25 | 达必佳(短效) |
| 普丽康     | 150   | 1500   | 10 | 2016-11-11 | 24.00 | 1.51 | 2.36 | 达必佳(短效) |
| 果纳芬     | 150   | 2175   | 12 | 2016-11-07 | 45.00 | 1.62 | 3.92 | 达必佳(短效) |
| 果纳芬     | 150   | 3375   | 16 | 2016-10-28 | 28.00 | 3.21 | 5.25 | 达必佳(短效) |
| 果纳芬     | 150   | 1650   | 11 | 2016-10-20 | 43.00 | 1.86 | 3.78 | 达必佳(短效) |
| 普丽康     | 150   | 1475   | 8  | 2016-11-21 | 40.00 | 1.94 | 3.28 | 达必佳(短效) |
| 普丽康     | 150   | 1800   | 12 | 2017-02-16 | 19.00 | 1.20 | 1.11 | 达必佳(短效) |
| 果纳芬     | 150   | 2062.5 | 11 | 2016-11-28 | 26.00 | 0.89 | 3.08 | 达必佳(短效) |
| HMG,果纳芬 | 225   | 2550   | 11 | 2016-10-21 | 11.00 | 1.24 | 2.86 | 达必佳(短效) |
| 普丽康     | 200   | 2800   | 13 | 2016-11-11 | 35.00 | 1.62 | 2.74 | 达必佳(短效) |
| 普丽康     | 150   | 1275   | 9  | 2016-11-01 | 38.00 | 1.79 | 2.78 | 达菲林(短效) |
| 果纳芬     | 150   | 1500   | 9  | 2016-11-04 | 47.00 | 0.99 | 4.99 | 达菲林(短效) |
| HMG,果纳芬 | 225   | 2625   | 11 | 2016-12-02 | 44.00 | 1.87 | 2.69 | 达必佳(短效) |
| 普丽康     | 100   | 1700   | 13 | 2016-10-27 | 29.00 | 2.56 | 2.26 | 达必佳(短效) |
| HMG,果纳芬 | 300   | 3750   | 11 | 2016-10-19 | 25.00 | 1.80 | 2.87 | 达菲林(短效) |
| 普丽康     | 200   | 2450   | 11 | 2016-11-25 | 24.00 | 3.13 | 3.71 | 达必佳(短效) |
| 普丽康     | 150   | 1500   | 10 | 2016-11-01 | 25.00 | 1.15 | 2.95 | 达菲林(长效) |
| 果纳芬     | 150   | 1350   | 9  | 2016-11-28 | 26.00 | 0.81 | 4.83 | 达必佳(短效) |
| 普丽康     | 150   | 1575   | 10 | 2016-11-17 | 13.00 | 1.15 | 1.89 | 达必佳(短效) |

|         |       |        |    |            |       |      |      |         |
|---------|-------|--------|----|------------|-------|------|------|---------|
| 普丽康     | 200   | 1950   | 9  | 2016-11-17 | 12.00 | 2.00 | 4.71 | 达必佳(短效) |
| HMG,普丽康 | 225   | 7125   | 22 | 2016-11-07 | 13.00 | 1.79 | 3.90 | 达必佳(短效) |
| 果纳芬     | 150   | 1687.5 | 12 |            | 23.00 | 2.13 | 3.55 |         |
| 普丽康     | 200   | 2275   | 11 | 2016-11-18 | 15.00 | 1.42 | 4.09 | 达必佳(短效) |
| 果纳芬     | 150   | 2700   | 14 | 2016-12-15 | 37.00 | 1.11 | 3.12 | 达必佳(短效) |
| HMG,普丽康 | 175   | 2325   | 12 | 2016-11-25 | 30.00 | 1.94 | 2.22 | 达必佳(短效) |
| 普丽康     | 200   | 4950   | 13 | 2016-11-18 | 19.00 | 1.07 | 4.12 | 达菲林(短效) |
| 果纳芬     | 150   | 2250   | 12 | 2016-11-17 | 27.00 | 3.43 | 1.14 | 达必佳(短效) |
| 果纳芬     | 150   | 2550   | 13 | 2016-12-01 | 23.00 | 1.35 | 4.06 | 达必佳(短效) |
| HMG,果纳芬 | 225   | 3200   | 11 | 2016-11-15 | 29.00 | 1.79 | 2.38 | 达必佳(短效) |
| 果纳芬     | 150   | 2400   | 13 | 2016-12-01 | 40.00 | 1.62 | 1.86 | 达必佳(短效) |
| 果纳芬     | 150   | 2475   | 13 | 2016-11-23 | 29.00 | 2.77 | 4.78 | 达必佳(短效) |
| HMG,普丽康 | 175   | 4550   | 16 | 2016-12-15 | 31.00 | 1.78 | 3.25 | 达必佳(短效) |
| 果纳芬     | 225   | 3750   | 13 | 2016-12-05 | 13.00 | 2.75 | 4.71 | 达必佳(短效) |
|         | 0     | 1800   | 12 | 2016-12-06 | 35.00 | 1.59 | 2.44 | 达必佳(短效) |
| 普丽康     | 200   | 2900   | 13 | 2016-12-06 | 11.00 | 2.33 | 4.09 | 达必佳(短效) |
| 果纳芬     | 150   | 2025   | 12 | 2016-12-02 | 14.00 | 2.31 | 5.48 | 达必佳(短效) |
| 果纳芬     | 150   | 750    | 5  | 2016-12-16 | 46.00 | 2.03 | 4.06 | 达必佳(短效) |
| 果纳芬     | 112.5 | 2250   | 11 | 2016-12-05 | 29.00 | 2.55 | 3.60 | 达菲林(短效) |
| 普丽康     | 150   | 2850   | 12 | 2017-03-09 | 32.00 | 2.29 | 3.06 | 达必佳(短效) |
| 果纳芬     | 112.5 | 2962.5 | 18 | 2016-12-19 | 28.00 | 1.61 | 2.62 | 达必佳(短效) |
| HMG,果纳芬 | 187.5 | 1650   | 9  | 2016-12-12 | 13.00 | 1.59 | 1.88 | 达菲林(短效) |
| 普丽康     | 100   | 2700   | 13 | 2016-12-16 | 40.00 | 3.49 | 4.76 | 达必佳(短效) |
| 果纳芬     | 150   | 1425   | 10 | 2016-12-07 | 40.00 | 1.26 | 4.00 | 达必佳(短效) |
| 果纳芬     | 150   | 1575   | 10 | 2016-12-17 | 37.00 | 4.68 | 4.73 | 达必佳(短效) |
| 果纳芬     | 150   | 1875   | 11 | 2016-12-22 | 14.00 | 2.32 | 3.73 | 达必佳(短效) |
| HMG,普丽康 | 275   | 3025   | 11 | 2016-12-16 | 16.00 | 1.68 | 1.86 | 达菲林(短效) |
| 果纳芬,丽申宝 | 225   | 2025   | 9  | 2017-02-01 | 26.00 | 2.09 | 3.09 | 达必佳(短效) |
| 果纳芬     | 150   | 2625   | 14 | 2016-12-15 | 25.00 | 0.96 | 3.03 | 达必佳(短效) |
| 普丽康     | 150   | 1650   | 11 | 2017-02-09 | 47.00 | 2.21 | 4.40 | 达必佳(短效) |
| 普丽康     | 150   | 1500   | 10 | 2016-12-16 | 27.00 | 2.43 | 3.89 | 达必佳(短效) |
| HMG,普丽康 | 275   | 2500   | 8  | 2017-03-09 | 23.00 | 1.35 | 5.57 | 达必佳(短效) |
| 普丽康     | 150   | 1500   | 10 | 2017-02-02 | 38.00 | 1.83 | 5.20 | 达必佳(短效) |
| 丽申宝     | 187.5 | 2100   | 10 | 2017-02-06 | 16.00 | 0.88 | 1.96 | 达必佳(短效) |
| 普丽康     | 150   | 1500   | 10 | 2017-01-23 | 47.00 | 1.36 | 3.29 | 达必佳(短效) |
| 普丽康     | 200   | 2300   | 12 | 2017-02-03 | 11.00 | 1.63 | 1.89 | 达必佳(短效) |
| 普丽康     | 200   | 2400   | 11 | 2017-03-01 | 25.00 | 1.34 | 3.02 | 达必佳(短效) |
| 普丽康     | 150   | 1350   | 9  | 2017-02-08 | 39.00 | 1.08 | 4.96 | 达必佳(短效) |
| 普丽康     | 150   | 2475   | 14 | 2017-03-13 | 50.00 | 1.50 | 4.09 | 达必佳(短效) |
| HMG     | 225   | 3075   | 8  | 2016-12-23 | 16.00 | 2.45 | 4.31 | 达菲林(短效) |
| 普丽康     | 150   | 1500   | 10 | 2017-02-07 | 47.00 | 1.92 | 3.67 | 达必佳(短效) |
| 果纳芬,丽申宝 | 225   | 2625   | 12 | 2017-02-20 | 13.00 | 1.37 | 2.21 | 达必佳(短效) |
| 普丽康     | 200   | 2075   | 10 | 2017-01-25 | 14.00 | 1.45 | 2.16 | 达菲林(短效) |
| 丽申宝     | 187.5 | 1762.5 | 9  | 2017-02-01 | 17.00 | 2.43 | 3.33 | 达必佳(短效) |
| 普丽康     | 150   | 1650   | 11 | 2017-02-20 | 42.00 | 2.79 | 5.53 | 达必佳(短效) |
| 普丽康     | 200   | 1800   | 9  | 2017-02-20 | 24.00 | 1.17 | 3.17 | 达必佳(短效) |
| 普丽康     | 150   | 1350   | 9  | 2017-02-23 | 15.00 | 2.88 | 5.06 | 达必佳(短效) |
| 果纳芬     | 112.5 | 1200   | 10 | 2017-01-23 | 31.00 | 2.00 | 3.93 | 达必佳(短效) |
| 普丽康     | 150   | 1275   | 9  | 2017-02-07 | 50.00 | 2.53 | 3.06 | 达必佳(短效) |
| 普丽康     | 150   | 1575   | 10 | 2017-02-06 | 13.00 | 1.97 | 6.29 | 达必佳(短效) |



|         |       |        |    |            |       |      |      |         |
|---------|-------|--------|----|------------|-------|------|------|---------|
|         | 0     | 3725   | 10 | 2017-02-06 | 48.00 | 2.14 | 2.35 | 达菲林(短效) |
| 果纳芬,丽申宝 | 225   | 4200   | 13 | 2017-02-07 | 16.00 | 1.34 | 4.07 | 达必佳(短效) |
| 普丽康     | 150   | 1950   | 12 | 2017-02-03 | 46.00 | 1.24 | 4.58 | 达必佳(短效) |
| 普丽康     | 150   | 2925   | 14 | 2017-03-03 | 37.00 | 1.82 | 4.63 | 达必佳(短效) |
| 普丽康     | 150   | 1650   | 11 | 2017-02-24 | 26.00 | 1.45 | 2.78 | 达必佳(短效) |
| 普丽康     | 100   | 2850   | 13 | 2017-01-23 | 13.00 | 1.21 | 3.31 | 达必佳(短效) |
| 普丽康     | 150   | 3600   | 12 | 2017-02-06 | 12.00 | 2.02 | 2.77 | 达必佳(短效) |
| HMG,普丽康 | 425   | 4125   | 9  | 2017-02-08 | 15.00 | 1.25 | 2.34 | 达必佳(短效) |
| 普丽康     | 150   | 2150   | 11 | 2017-02-08 | 39.00 | 1.40 | 3.88 | 达必佳(短效) |
| 普丽康     | 150   | 1650   | 11 | 2017-02-09 | 12.00 | 1.47 | 4.37 | 达必佳(短效) |
| HMG,普丽康 | 275   | 3050   | 12 | 2017-02-10 | 42.00 | 1.44 | 2.46 | 达必佳(短效) |
| 普丽康     | 150   | 1350   | 9  | 2017-02-10 | 31.00 | 4.52 | 5.18 | 达必佳(短效) |
| 普丽康     | 150   | 1725   | 11 | 2017-02-16 | 16.00 | 2.41 | 6.81 | 达必佳(短效) |
| 普丽康     | 150   | 3225   | 15 | 2017-02-10 | 39.00 | 3.10 | 3.09 | 达必佳(短效) |
| 普丽康     | 150   | 4300   | 14 | 2017-03-01 | 31.00 | 2.37 | 3.86 | 达必佳(短效) |
| 普丽康     | 150   | 1350   | 9  | 2017-02-17 | 44.00 | 2.09 | 2.74 | 达必佳(短效) |
| 普丽康     | 200   | 2925   | 13 | 2017-03-01 | 35.00 | 1.27 | 5.09 | 达必佳(短效) |
| 丽申宝     | 150   | 1800   | 11 | 2017-02-20 | 31.00 | 1.55 | 3.04 | 达必佳(短效) |
| 丽申宝,普丽康 | 250   | 2700   | 10 | 2017-03-02 | 43.00 | 1.90 | 3.56 | 达必佳(短效) |
| 丽申宝     | 225   | 3150   | 14 | 2017-03-08 | 37.00 | 2.20 | 1.66 | 达必佳(短效) |
| 普丽康     | 150   | 1500   | 10 | 2017-03-07 | 47.00 | 1.76 | 5.19 | 达必佳(短效) |
| 丽申宝     | 225   | 2850   | 12 | 2017-03-01 | 23.00 | 2.05 | 2.38 | 达必佳(短效) |
| 普丽康     | 150   | 1500   | 10 | 2017-03-10 | 33.00 | 1.84 | 2.54 | 达必佳(短效) |
| 普丽康     | 150   | 1725   | 11 | 2017-03-24 | 22.00 | 2.41 | 2.92 | 达必佳(短效) |
| 普丽康     | 150   | 1500   | 10 | 2017-03-10 | 37.00 | 3.00 | 6.47 | 达必佳(短效) |
| 普丽康     | 225   | 2700   | 12 | 2017-03-08 | 33.00 | 3.03 | 4.52 | 达必佳(短效) |
| 普丽康     | 150   | 3750   | 14 | 2017-02-23 | 18.00 | 0.98 | 3.27 | 达必佳(短效) |
| HMG,丽申宝 | 300   | 3300   | 11 | 2017-02-23 | 40.00 | 1.63 | 3.38 | 达必佳(短效) |
| 普丽康     | 200   | 2250   | 11 | 2017-02-23 | 30.00 | 2.69 | 3.11 | 达必佳(短效) |
| 普丽康     | 150   | 1425   | 9  | 2017-02-24 | 23.00 | 1.00 | 3.87 | 达必佳(短效) |
| 丽申宝     | 150   | 1800   | 12 | 2017-02-28 | 46.00 | 2.55 | 4.91 | 达必佳(短效) |
| 普丽康     | 200   | 1875   | 10 | 2017-03-07 | 26.00 | 1.11 | 3.14 | 达必佳(短效) |
| 果纳芬     | 112.5 | 1462.5 | 11 | 2017-05-17 | 25.00 | 1.98 | 2.34 | 达菲林(短效) |
| 普丽康     | 150   | 2100   | 12 | 2017-03-13 | 23.00 | 1.90 | 5.52 | 达必佳(短效) |
| 普丽康     | 200   | 2550   | 11 | 2017-03-01 | 18.00 | 2.49 | 5.13 | 达必佳(短效) |
| 普丽康     | 150   | 2437.5 | 14 | 2017-03-27 | 19.00 | 2.30 | 3.56 | 达必佳(短效) |
| 普丽康     | 150   | 1650   | 11 | 2017-03-09 | 36.00 | 1.45 | 2.42 | 达必佳(短效) |
| HMG,普丽康 | 225   | 2750   | 12 | 2017-05-12 | 19.00 | 0.91 | 2.70 | 达必佳(短效) |
| 普丽康     | 150   | 1575   | 10 | 2017-03-02 | 50.00 | 1.62 | 4.44 | 达必佳(短效) |
| 普丽康     | 150   | 1350   | 9  | 2017-03-31 | 33.00 | 2.92 | 4.35 | 达必佳(短效) |
| 普丽康     | 150   | 1350   | 9  | 2017-03-24 | 16.00 | 1.20 | 2.68 | 达必佳(短效) |
| 普丽康     | 225   | 2700   | 12 | 2017-03-08 | 11.00 | 1.32 | 3.89 | 达必佳(短效) |
| HMG,果纳芬 | 187.5 | 2550   | 10 | 2017-07-22 | 15.00 | 3.65 | 2.87 | 达必佳(短效) |
| 丽申宝     | 150   | 2775   | 14 | 2017-04-07 | 20.00 | 1.87 | 4.16 | 达必佳(短效) |
| 果纳芬     | 150   | 1650   | 11 | 2017-05-05 | 47.00 | 0.81 | 4.87 | 达必佳(短效) |
| 普丽康     | 150   | 2625   | 11 | 2017-03-22 | 16.00 | 1.48 | 4.53 | 达必佳(短效) |
| 普丽康     | 150   | 1650   | 11 | 2017-03-14 | 19.00 | 2.95 | 5.32 | 达必佳(短效) |
| 丽申宝     | 225   | 2700   | 11 | 2017-03-09 | 49.00 | 1.79 | 4.19 | 达必佳(短效) |
| 普丽康     | 150   | 2025   | 11 | 2017-03-21 | 45.00 | 1.29 | 4.02 | 达必佳(短效) |
| 果纳芬,丽申宝 | 225   | 2250   | 9  | 2017-02-27 | 22.00 | 1.54 | 4.49 | 达必佳(短效) |

|         |       |        |    |            |       |      |      |         |
|---------|-------|--------|----|------------|-------|------|------|---------|
| 果纳芬     | 150   | 1500   | 10 | 2017-02-28 | 40.00 | 4.51 | 2.44 | 达必佳(短效) |
| 普丽康     | 150   | 1500   | 10 | 2017-03-13 | 21.00 | 1.90 | 2.86 | 达必佳(短效) |
| 普丽康     | 225   | 2700   | 11 | 2017-03-21 | 18.00 | 0.85 | 2.12 | 达必佳(短效) |
| 普丽康     | 200   | 2550   | 13 | 2017-03-23 | 12.00 | 2.50 | 6.86 | 达必佳(短效) |
| 丽申宝     | 225   | 3825   | 13 | 2017-03-14 | 13.00 | 1.63 | 4.70 | 达必佳(短效) |
| 普丽康     | 200   | 2650   | 12 | 2017-03-30 | 11.00 | 2.60 | 4.57 | 达必佳(短效) |
| 丽申宝     | 225   | 2250   | 10 | 2017-04-21 | 21.00 | 2.76 | 3.97 | 达必佳(短效) |
| HMG,果纳芬 | 187.5 | 3675   | 14 | 2017-04-14 | 22.00 | 1.60 | 4.09 | 达必佳(短效) |
| 普丽康     | 200   | 3350   | 13 | 2017-03-31 | 28.00 | 2.87 | 4.79 | 达必佳(短效) |
| 普丽康     | 200   | 2050   | 10 | 2017-03-23 | 27.00 | 4.76 | 3.73 | 达必佳(短效) |
| 果纳芬     | 150   | 1275   | 9  | 2017-05-05 | 11.00 | 1.08 | 3.64 | 达必佳(短效) |
| 普丽康     | 150   | 1350   | 10 | 2017-03-30 | 40.00 | 2.56 | 4.11 | 达必佳(短效) |
| 丽申宝     | 150   | 1875   | 12 | 2017-04-07 | 19.00 | 2.57 | 5.52 | 达必佳(短效) |
| 果纳芬     | 112.5 | 1237.5 | 9  | 2017-04-25 | 32.00 | 2.72 | 4.68 | 达必佳(短效) |
| 丽申宝     | 150   | 4800   | 15 | 2017-04-07 | 31.00 | 2.04 | 4.95 | 达必佳(短效) |
| 果纳芬     | 150   | 1200   | 9  | 2017-04-17 | 50.00 | 2.56 | 3.52 | 达必佳(短效) |
| 普丽康     | 150   | 1500   | 10 | 2017-03-21 | 26.00 | 0.87 | 3.65 | 达必佳(短效) |
| 普丽康     | 150   | 2550   | 13 | 2017-04-06 | 10.00 | 2.69 | 4.34 | 达必佳(短效) |
| 丽申宝,普丽康 | 300   | 2700   | 8  | 2017-03-29 | 23.00 | 1.45 | 3.25 | 达必佳(短效) |
| 丽申宝     | 225   | 2700   | 10 | 2017-03-09 | 23.00 | 1.64 | 2.03 | 达必佳(短效) |
| 普丽康     | 150   | 1650   | 11 | 2017-03-28 | 22.00 | 2.18 | 3.97 | 达必佳(短效) |
| 果纳芬     | 150   | 4950   | 17 | 2017-04-17 | 26.00 | 3.05 | 3.56 | 达必佳(短效) |
| 果纳芬     | 150   | 2100   | 11 | 2017-04-14 | 10.00 | 3.78 | 4.69 | 达必佳(短效) |
| 丽申宝,普丽康 | 300   | 2700   | 9  | 2017-03-29 | 11.00 | 2.20 | 5.29 | 达必佳(短效) |
| 丽申宝,普丽康 | 225   | 2850   | 10 | 2017-04-05 | 18.00 | 2.22 | 5.05 | 达必佳(短效) |
| HMG,丽申宝 | 225   | 5400   | 17 | 2017-04-21 | 46.00 | 1.79 | 4.03 | 达必佳(短效) |
| 果纳芬     | 150   | 4650   | 15 | 2017-04-04 | 28.00 | 2.72 | 4.36 | 达必佳(短效) |
| 普丽康     | 200   | 2100   | 11 | 2017-03-30 | 25.00 | 1.80 | 2.51 | 达必佳(短效) |
| HMG,果纳芬 | 225   | 3600   | 14 | 2017-04-21 | 44.00 | 3.06 | 3.56 | 达必佳(短效) |
| 丽申宝     | 225   | 6150   | 19 | 2017-05-05 | 42.00 | 1.75 | 4.60 | 达必佳(短效) |
| HMG,普丽康 | 187.5 | 1725   | 8  | 2017-06-21 | 24.00 | 2.28 | 3.59 | 达必佳(短效) |
| 果纳芬     | 150   | 1350   | 9  | 2017-04-10 | 23.00 | 1.68 | 4.18 | 达必佳(短效) |
| HMG,果纳芬 | 225   | 2250   | 10 | 2017-04-21 | 20.00 | 1.97 | 2.72 | 达必佳(短效) |
| 果纳芬     | 150   | 1875   | 10 | 2017-04-19 | 12.00 | 2.76 | 2.73 | 达必佳(短效) |
| HMG,果纳芬 | 225   | 2475   | 11 | 2017-04-21 | 10.00 | 2.24 | 5.85 | 达必佳(短效) |
| 果纳芬     | 150   | 3750   | 12 | 2017-05-05 | 15.00 | 1.45 | 3.07 | 达必佳(短效) |
| 普丽康     | 150   | 1950   | 11 | 2017-04-10 | 10.00 | 1.80 | 4.84 | 达必佳(短效) |
| 丽申宝,普丽康 | 175   | 2125   | 10 | 2017-04-10 | 14.00 | 2.00 | 3.23 | 达必佳(短效) |
| 果纳芬     | 150   | 2700   | 12 | 2017-04-27 | 43.00 | 1.66 | 1.16 | 达菲林(短效) |
| 果纳芬     | 150   | 1650   | 11 | 2017-04-25 | 47.00 | 2.03 | 3.12 | 达必佳(短效) |
| HMG,果纳芬 | 187.5 | 3000   | 13 | 2017-05-08 | 10.00 | 2.33 | 1.35 | 达必佳(短效) |
| 普丽康     | 200   | 2100   | 10 | 2017-04-11 | 16.00 | 2.34 | 5.75 | 达必佳(短效) |
| 果纳芬     | 150   | 2100   | 13 | 2017-04-18 | 29.00 | 3.14 | 4.39 | 达必佳(短效) |
| 果纳芬     | 225   | 3450   | 13 | 2017-04-24 | 13.00 | 1.79 | 4.28 | 达必佳(短效) |
| HMG,果纳芬 | 225   | 1800   | 10 | 2017-04-21 | 37.00 | 1.75 | 2.45 | 达必佳(短效) |
| HMG,果纳芬 | 225   | 2700   | 12 | 2017-04-13 | 22.00 | 2.57 | 3.41 | 达必佳(短效) |
| 丽申宝     | 225   | 2925   | 13 | 2017-04-28 | 38.00 | 1.91 | 2.67 | 达菲林(短效) |
| 果纳芬     | 150   | 1650   | 11 | 2017-04-14 | 48.00 | 1.51 | 2.05 | 达必佳(短效) |
| 果纳芬     | 150   | 1500   | 10 | 2017-04-14 | 18.00 | 2.33 | 5.22 | 达必佳(短效) |
| 果纳芬     | 150   | 1950   | 13 | 2017-05-31 | 29.00 | 1.95 | 3.85 | 达菲林(短效) |

|         |       |        |    |            |       |      |      |         |
|---------|-------|--------|----|------------|-------|------|------|---------|
| 果纳芬     | 112.5 | 4200   | 15 | 2017-03-31 | 40.00 | 1.79 | 4.56 | 达必佳(短效) |
| 普丽康     | 150   | 3000   | 14 | 2017-03-31 | 29.00 | 2.21 | 5.00 | 达必佳(短效) |
| 丽申宝     | 150   | 3300   | 11 | 2017-04-25 | 25.00 | 2.21 | 5.27 | 达必佳(短效) |
| 果纳芬     | 150   | 1425   | 10 | 2017-05-15 | 18.00 | 1.85 | 3.60 | 达必佳(短效) |
| 丽申宝     | 150   | 1800   | 10 | 2017-04-18 | 16.00 | 4.32 | 4.57 | 达必佳(短效) |
| 普丽康     | 200   | 1200   | 6  | 2017-04-19 | 39.00 | 2.31 | 5.64 | 达菲林(短效) |
| 丽申宝     | 225   | 2625   | 12 | 2017-04-21 | 10.00 | 1.75 | 3.44 | 达必佳(短效) |
| HMG,果纳芬 | 225   | 3000   | 12 | 2017-04-21 | 36.00 | 2.29 | 3.89 | 达必佳(短效) |
| HMG,果纳芬 | 225   | 2475   | 11 | 2017-06-02 | 31.00 | 1.52 | 6.00 | 达菲林(短效) |
| 丽申宝     | 225   | 2250   | 10 | 2017-05-04 | 48.00 | 1.83 | 4.18 | 达必佳(短效) |
| HMG,果纳芬 | 225   | 2250   | 10 | 2017-05-16 | 16.00 | 1.51 | 4.19 | 达必佳(短效) |
| HMG,果纳芬 | 225   | 2325   | 10 | 2017-05-22 | 14.00 | 1.57 | 3.84 | 达菲林(短效) |
| 果纳芬     | 150   | 4050   | 14 | 2017-05-26 | 13.00 | 2.30 | 3.57 | 达菲林(短效) |
| 丽申宝     | 225   | 5175   | 18 | 2017-05-05 | 11.00 | 1.40 | 3.26 | 达必佳(短效) |
| HMG,果纳芬 | 225   | 2625   | 11 | 2017-05-26 | 28.00 | 1.43 | 4.11 | 达菲林(短效) |
| 丽申宝     | 150   | 3150   | 13 | 2017-05-05 | 23.00 | 4.38 | 6.43 | 达必佳(短效) |
| 果纳芬     | 225   | 2475   | 11 | 2017-06-06 | 45.00 | 1.08 | 4.07 | 达菲林(长效) |
| 果纳芬     | 150   | 3375   | 13 | 2017-05-25 | 36.00 | 4.84 | 6.58 | 达菲林(短效) |
| HMG,果纳芬 | 225   | 2250   | 10 | 2017-05-08 | 17.00 | 2.48 | 1.44 | 达菲林(短效) |
| HMG,果纳芬 | 225   | 3000   | 12 | 2017-06-09 | 28.00 | 3.15 | 4.23 | 达必佳(短效) |
| 果纳芬     | 150   | 3600   | 13 | 2017-05-26 | 25.00 | 1.04 | 3.40 | 达菲林(短效) |
| 丽申宝     | 150   | 2325   | 12 | 2017-05-26 | 47.00 | 0.94 | 2.56 | 达菲林(短效) |
| 果纳芬     | 150   | 2100   | 14 | 2017-05-18 | 24.00 | 1.71 | 4.90 | 达菲林(短效) |
| 果纳芬     | 150   | 2325   | 12 | 2017-06-16 | 16.00 | 2.57 | 2.16 | 达必佳(短效) |
| 果纳芬     | 150   | 2850   | 13 | 2017-05-22 | 24.00 | 1.00 | 2.86 | 达菲林(短效) |
| HMG,果纳芬 | 375   | 4500   | 12 | 2017-05-12 | 14.00 | 2.85 | 1.66 | 达必佳(短效) |
| HMG,普丽康 | 175   | 1975   | 11 | 2017-06-02 | 18.00 | 1.05 | 2.56 | 达菲林(短效) |
| 果纳芬     | 150   | 4500   | 19 | 2017-06-02 | 19.00 | 1.59 | 3.75 | 达菲林(短效) |
| 果纳芬     | 150   | 1500   | 10 | 2017-06-21 | 17.00 | 1.05 | 2.48 | 达菲林(短效) |
| 果纳芬     | 150   | 2325   | 12 | 2017-06-30 | 35.00 | 3.76 | 5.06 | 达菲林(短效) |
| HMG,果纳芬 | 187.5 | 2325   | 11 | 2017-06-15 | 17.00 | 1.42 | 3.02 | 达必佳(短效) |
| 果纳芬     | 150   | 1800   | 11 | 2017-05-19 | 48.00 | 4.44 | 4.37 | 达菲林(短效) |
| 果纳芬     | 150   | 4500   | 15 | 2017-05-31 | 31.00 | 3.76 | 4.66 | 达菲林(短效) |
| 果纳芬     | 150   | 2400   | 13 | 2017-05-23 | 15.00 | 0.93 | 4.39 | 达菲林(短效) |
| 果纳芬     | 150   | 2325   | 12 | 2017-06-21 | 48.00 | 2.08 | 2.90 | 达菲林(短效) |
| 果纳芬     | 150   | 1500   | 10 | 2017-05-31 | 29.00 | 1.84 | 4.70 | 达菲林(短效) |
| 果纳芬     | 150   | 2175   | 11 | 2017-06-05 | 12.00 | 1.81 | 5.95 | 达菲林(短效) |
| 果纳芬     | 150   | 1500   | 10 | 2017-06-27 | 11.00 | 3.21 | 5.37 | 达必佳(短效) |
| 果纳芬     | 150   | 2550   | 13 | 2017-05-25 | 15.00 | 2.03 | 5.34 | 达菲林(短效) |
| 果纳芬     | 150   | 1500   | 10 | 2017-06-22 | 33.00 | 2.92 | 4.12 | 达菲林(短效) |
| 丽申宝     | 150   | 2550   | 13 | 2017-05-25 | 19.00 | 1.21 | 3.01 | 达菲林(短效) |
| 果纳芬     | 150   | 2400   | 12 | 2017-05-26 | 18.00 | 1.61 | 3.77 | 达菲林(短效) |
| HMG,丽申宝 | 225   | 3900   | 13 | 2017-05-31 | 28.00 | 1.74 | 5.28 | 达菲林(短效) |
| 果纳芬     | 150   | 1500   | 10 | 2017-05-31 | 36.00 | 2.13 | 4.66 | 达菲林(短效) |
| HMG,普丽康 | 187.5 | 2062.5 | 11 | 2017-06-26 | 17.00 | 1.86 | 2.42 | 达必佳(短效) |
| 果纳芬     | 150   | 1500   | 10 | 2017-06-09 | 30.00 | 1.07 | 2.29 | 达菲林(短效) |
| HMG,果纳芬 | 225   | 2025   | 9  | 2017-06-02 | 30.00 | 2.55 | 5.86 | 达菲林(短效) |
| HMG,果纳芬 | 150   | 1575   | 8  | 2017-06-12 | 25.00 | 1.21 | 1.98 | 达必佳(短效) |
| 丽申宝     | 150   | 2625   | 12 | 2017-06-02 | 38.00 | 1.46 | 2.53 | 达菲林(短效) |
| HMG,果纳芬 | 300   | 4050   | 13 | 2017-06-01 | 15.00 | 1.68 | 4.12 | 达菲林(短效) |

|         |       |        |    |            |       |      |      |         |
|---------|-------|--------|----|------------|-------|------|------|---------|
| 果纳芬     | 150   | 1912.5 | 11 | 2017-06-27 | 18.00 | 3.05 | 2.80 | 达必佳(短效) |
| 果纳芬     | 150   | 3900   | 12 | 2017-07-24 | 15.00 | 1.78 | 4.44 | 达菲林(短效) |
| 果纳芬     | 150   | 1350   | 9  | 2017-06-12 | 33.00 | 1.58 | 3.92 | 达菲林(短效) |
| 果纳芬     | 150   | 1350   | 9  | 2017-06-12 | 50.00 | 2.81 | 3.08 | 达菲林(短效) |
| 果纳芬     | 150   | 3900   | 14 | 2017-07-31 | 36.00 | 2.23 | 3.64 | 达菲林(短效) |
| 果纳芬     | 150   | 1800   | 10 | 2017-06-20 | 12.00 | 2.36 | 2.94 | 达菲林(短效) |
| 果纳芬     | 150   | 1950   | 11 | 2017-07-03 | 27.00 | 0.88 | 2.39 | 达菲林(短效) |
| 果纳芬     | 225   | 4950   | 13 | 2017-06-23 | 37.00 | 1.30 | 5.33 | 达菲林(短效) |
| 果纳芬     | 150   | 2475   | 12 | 2017-07-04 | 36.00 | 1.54 | 3.85 | 达菲林(短效) |
| 果纳芬     | 225   | 2925   | 13 | 2017-06-15 | 11.00 | 2.23 | 3.66 | 达菲林(短效) |
| 果纳芬     | 150   | 1500   | 10 | 2017-07-20 | 21.00 | 2.00 | 4.27 | 达菲林(短效) |
| 果纳芬     | 112.5 | 1500   | 11 | 2017-06-15 | 46.00 | 1.96 | 3.28 | 达菲林(短效) |
| 果纳芬     | 150   | 1875   | 12 | 2017-07-17 | 33.00 | 2.42 | 5.93 | 达菲林(短效) |
| 果纳芬     | 150   | 3675   | 14 | 2017-06-22 | 24.00 | 3.96 | 6.26 | 达菲林(短效) |
| 果纳芬     | 112.5 | 1687.5 | 11 | 2017-07-14 | 19.00 | 1.73 | 4.70 | 达菲林(短效) |
| 果纳芬     | 225   | 2700   | 12 | 2017-07-17 | 47.00 | 0.97 | 3.48 | 达菲林(短效) |
| 果纳芬     | 150   | 1800   | 10 | 2017-07-07 | 42.00 | 1.68 | 2.67 | 达菲林(短效) |
| HMG,普丽康 | 275   | 4950   | 12 | 2017-11-27 | 12.00 | 1.73 | 6.52 | 达必佳(短效) |
| 果纳芬     | 150   | 2925   | 12 | 2017-07-10 | 16.00 | 2.90 | 3.92 | 达菲林(短效) |
| 果纳芬     | 150   | 1800   | 12 | 2017-07-24 | 11.00 | 1.79 | 3.71 | 达菲林(短效) |
| 果纳芬     | 150   | 1725   | 10 | 2017-07-05 | 39.00 | 2.12 | 3.80 | 达菲林(短效) |
| HMG,果纳芬 | 225   | 3600   | 12 | 2017-07-04 | 10.00 | 2.92 | 4.89 | 达菲林(短效) |
| 果纳芬     | 150   | 2250   | 12 | 2017-07-27 | 20.00 | 1.24 | 4.55 | 达菲林(短效) |
| 果纳芬     | 150   | 2625   | 12 | 2017-06-26 | 23.00 | 1.60 | 3.13 | 达菲林(短效) |
| 普丽康     | 100   | 4125   | 15 | 2017-07-14 | 42.00 | 2.76 | 3.36 | 达菲林(短效) |
| HMG,果纳芬 | 150   | 2437.5 | 13 | 2017-07-17 | 26.00 | 1.73 | 3.66 | 达必佳(短效) |
| 果纳芬     | 150   | 1350   | 9  | 2017-07-20 | 18.00 | 3.36 | 4.91 | 达菲林(短效) |
| 果纳芬     | 150   | 1650   | 11 | 2017-06-29 | 32.00 | 2.63 | 4.82 | 达菲林(短效) |
| 普丽康     | 150   | 1500   | 10 | 2017-08-14 | 37.00 | 2.96 | 4.57 | 达菲林(短效) |
| HMG,果纳芬 | 187.5 | 2100   | 10 | 2017-07-14 | 16.00 | 3.55 | 2.65 | 达菲林(长效) |
| HMG,果纳芬 | 225   | 2025   | 9  | 2017-07-07 | 20.00 | 1.50 | 4.87 | 达菲林(短效) |
| HMG,果纳芬 | 300   | 3000   | 10 | 2017-06-23 | 35.00 | 2.79 | 3.62 | 达必佳(短效) |
| 果纳芬     | 150   | 3000   | 12 | 2017-09-19 | 15.00 | 2.77 | 4.81 | 达必佳(短效) |
| 果纳芬     | 150   | 1950   | 10 | 2017-08-14 | 42.00 | 1.31 | 4.03 | 达菲林(短效) |
| HMG,果纳芬 | 225   | 3225   | 14 | 2017-07-27 | 24.00 | 2.10 | 4.36 | 达必佳(短效) |
| HMG,普丽康 | 275   | 4350   | 12 | 2017-10-02 | 23.00 | 1.81 | 1.76 | 达菲林(短效) |
| HMG,果纳芬 | 225   | 2625   | 12 | 2017-07-10 | 28.00 | 1.47 | 5.49 | 达菲林(短效) |
| 普丽康     | 150   | 1500   | 10 | 2017-08-08 | 20.00 | 1.47 | 3.71 | 达菲林(短效) |
| 果纳芬     | 150   | 1500   | 10 | 2017-07-10 | 30.00 | 1.61 | 6.49 | 达菲林(短效) |
| 果纳芬     | 150   | 1500   | 10 | 2017-07-11 | 14.00 | 3.91 | 4.86 | 达菲林(短效) |
| 果纳芬,丽申宝 | 187.5 | 2925   | 13 | 2017-07-28 | 33.00 | 2.60 | 3.44 | 达必佳(短效) |
| HMG,果纳芬 | 225   | 2400   | 11 | 2017-08-04 | 11.00 | 1.30 | 5.40 | 达菲林(短效) |
| HMG,普丽康 | 175   | 2900   | 13 | 2017-07-12 | 22.00 | 1.48 | 3.64 | 达菲林(短效) |
| 果纳芬     | 225   | 2700   | 12 | 2017-07-12 | 23.00 | 1.80 | 2.36 | 达菲林(短效) |
| 果纳芬     | 150   | 2175   | 12 | 2017-07-13 | 18.00 | 1.55 | 3.97 | 达菲林(短效) |
| 果纳芬     | 150   | 2250   | 13 | 2017-07-17 | 19.00 | 1.50 | 4.02 | 达菲林(短效) |
| HMG,普丽康 | 450   | 4500   | 10 | 2017-07-05 | 23.00 | 1.05 | 1.28 | 达必佳(短效) |
| 果纳芬     | 150   | 1500   | 10 | 2017-07-18 | 10.00 | 1.75 | 2.40 | 达菲林(短效) |
| 果纳芬     | 150   | 1575   | 11 | 2017-07-17 | 28.00 | 2.30 | 3.13 | 达菲林(短效) |
| 果纳芬     | 150   | 1725   | 10 | 2017-08-01 | 37.00 | 1.82 | 2.39 | 达菲林(短效) |

|         |       |        |    |            |       |      |      |         |
|---------|-------|--------|----|------------|-------|------|------|---------|
| 普丽康     | 150   | 1650   | 11 | 2017-08-04 | 19.00 | 2.11 | 6.65 | 达菲林(短效) |
| HMG,普丽康 | 225   | 2250   | 10 | 2017-08-04 | 19.00 | 0.96 | 4.24 | 达菲林(短效) |
| 普丽康     | 150   | 1575   | 11 | 2017-08-04 | 23.00 | 1.27 | 3.31 | 达菲林(短效) |
| 果纳芬,丽申宝 | 187.5 | 1912.5 | 10 | 2017-07-28 | 43.00 | 3.07 | 5.04 | 达必佳(短效) |
| 果纳芬     | 225   | 2850   | 13 | 2017-07-24 | 31.00 | 2.14 | 4.68 | 达菲林(短效) |
| 果纳芬     | 150   | 2550   | 13 | 2017-07-28 | 28.00 | 1.71 | 1.53 | 达菲林(短效) |
| 果纳芬     | 150   | 2550   | 12 | 2017-07-24 | 40.00 | 2.88 | 4.95 | 达菲林(短效) |
| 普丽康     | 150   | 1650   | 11 | 2017-07-31 | 27.00 | 2.68 | 2.73 | 达菲林(短效) |
| 果纳芬     | 150   | 1650   | 11 | 2017-07-28 | 28.00 | 2.54 | 4.66 | 达菲林(短效) |
| 果纳芬     | 187.5 | 2462.5 | 10 | 2017-08-22 | 27.00 | 1.87 | 4.25 | 达必佳(短效) |
| HMG,果纳芬 | 187.5 | 2287.5 | 12 | 2017-08-14 | 11.00 | 1.34 | 1.38 | 达必佳(短效) |
| 果纳芬     | 225   | 3150   | 13 | 2017-08-14 | 17.00 | 2.32 | 3.38 | 达必佳(短效) |
| 果纳芬     | 150   | 1800   | 10 | 2017-08-15 | 13.00 | 2.33 | 2.72 | 达菲林(短效) |
| 普丽康     | 150   | 4350   | 15 | 2017-08-01 | 24.00 | 1.31 | 2.43 | 达菲林(短效) |
| HMG,果纳芬 | 187.5 | 2137.5 | 11 | 2017-08-08 | 32.00 | 1.80 | 3.89 | 达必佳(短效) |
| 普丽康     | 150   | 1350   | 9  | 2017-07-31 | 24.00 | 2.02 | 2.82 | 达菲林(短效) |
| HMG,果纳芬 | 225   | 3450   | 13 | 2017-07-31 | 20.00 | 1.24 | 2.66 | 达必佳(短效) |
| 普丽康     | 150   | 2550   | 14 | 2017-08-03 | 35.00 | 2.47 | 3.24 | 达菲林(短效) |
| HMG,普丽康 | 275   | 2550   | 9  | 2017-08-04 | 34.00 | 1.64 | 6.10 | 达菲林(短效) |
| HMG,果纳芬 | 225   | 5700   | 16 | 2017-09-18 | 36.00 | 1.61 | 5.51 | 达菲林(短效) |
| 普丽康     | 150   | 2625   | 12 | 2017-08-21 | 22.00 | 2.86 | 4.73 | 达菲林(短效) |
| 果纳芬     | 150   | 1725   | 10 | 2017-08-11 | 10.00 | 1.63 | 4.49 | 达菲林(短效) |
| HMG,果纳芬 | 187.5 | 2437.5 | 11 | 2017-08-04 | 20.00 | 2.47 | 4.42 | 达必佳(短效) |
| 普丽康     | 200   | 2175   | 10 | 2017-09-04 | 38.00 | 4.00 | 3.78 | 达必佳(短效) |
| 普丽康     | 150   | 3150   | 14 | 2017-09-18 | 22.00 | 2.23 | 2.88 | 达菲林(短效) |
| 普丽康     | 150   | 3675   | 15 | 2017-08-21 | 24.00 | 2.91 | 5.27 | 达菲林(短效) |
| 普丽康     | 200   | 4100   | 15 | 2017-08-24 | 10.00 | 3.02 | 4.53 | 达必佳(短效) |
| 果纳芬     | 150   | 1875   | 11 | 2017-08-11 | 18.00 | 1.68 | 2.80 | 达菲林(短效) |
| 普丽康     | 150   | 4725   | 15 | 2017-08-11 | 32.00 | 1.98 | 6.84 | 达菲林(短效) |
| 普丽康     | 200   | 4350   | 14 | 2017-08-15 | 35.00 | 2.84 | 5.82 | 达菲林(短效) |
| 果纳芬     | 150   | 2100   | 12 | 2017-08-14 | 29.00 | 1.79 | 3.83 | 达菲林(短效) |
| 果纳芬     | 150   | 1950   | 11 | 2017-08-31 | 11.00 | 1.49 | 3.34 | 达菲林(短效) |
| HMG,贺美奇 | 225   | 3375   | 12 | 2017-09-04 | 13.00 | 1.66 | 3.24 | 达必佳(短效) |
| 普丽康     | 150   | 1650   | 11 | 2017-08-18 | 42.00 | 1.26 | 4.60 | 达菲林(短效) |
| 果纳芬     | 225   | 3675   | 15 | 2017-08-18 | 25.00 | 3.41 | 5.01 | 达必佳(短效) |
| 果纳芬     | 187.5 | 3762.5 | 15 | 2017-08-21 | 38.00 | 3.40 | 4.29 | 达必佳(短效) |
| 普丽康     | 175   | 4200   | 16 | 2017-08-21 | 17.00 | 3.49 | 3.80 | 达必佳(短效) |
| 普丽康     | 150   | 1350   | 9  | 2017-09-08 | 38.00 | 3.15 | 2.99 | 达菲林(短效) |
| 普丽康     | 200   | 9087.5 | 24 | 2017-08-25 | 29.00 | 2.53 | 6.67 | 达必佳(短效) |
| 普丽康     | 150   | 2025   | 9  | 2017-09-08 | 43.00 | 1.93 | 5.81 | 达必佳(短效) |
| HMG,果纳芬 | 225   | 3975   | 13 | 2017-10-12 | 38.00 | 2.46 | 3.63 | 达必佳(短效) |
| 普丽康     | 200   | 3275   | 13 | 2017-08-24 | 25.00 | 3.47 | 3.71 | 达必佳(短效) |
| 普丽康     | 150   | 1225   | 9  | 2017-10-06 | 46.00 | 2.88 | 3.14 | 达必佳(短效) |
| 果纳芬     | 150   | 1800   | 12 | 2017-09-05 | 21.00 | 1.80 | 3.38 | 达菲林(短效) |
| HMG,普丽康 | 225   | 3375   | 13 | 2017-09-11 | 36.00 | 1.03 | 3.18 | 达菲林(短效) |
| 果纳芬     | 150   | 2025   | 11 | 2017-08-28 | 13.00 | 1.34 | 4.90 | 达菲林(短效) |
| 普丽康     | 150   | 2175   | 10 | 2017-09-14 | 30.00 | 1.69 | 4.75 | 达必佳(短效) |
| 普丽康     | 200   | 2325   | 10 | 2017-08-28 | 11.00 | 1.46 | 3.34 | 达菲林(短效) |
| 果纳芬     | 150   | 2887.5 | 15 | 2017-08-14 | 38.00 | 4.11 | 6.54 | 达必佳(短效) |
| HMG,果纳芬 | 225   | 2475   | 11 | 2017-08-29 | 11.00 | 1.53 | 4.36 | 达菲林(短效) |

|         |       |        |    |            |       |      |      |         |
|---------|-------|--------|----|------------|-------|------|------|---------|
| HMG,普丽康 | 237.5 | 2562.5 | 10 | 2017-09-08 | 25.00 | 2.16 | 3.98 | 达菲林(短效) |
| 果纳芬     | 150   | 5512.5 | 20 | 2017-11-15 | 32.00 | 1.76 | 4.22 | 达必佳(短效) |
| 果纳芬     | 187.5 | 3150   | 13 | 2017-08-21 | 34.00 | 3.16 | 3.62 | 达必佳(短效) |
| HMG,果纳芬 | 187.5 | 1912.5 | 9  | 2017-09-08 | 29.00 | 2.48 | 4.51 | 达必佳(短效) |
| HMG,果纳芬 | 187.5 | 2587.5 | 11 | 2017-09-05 | 37.00 | 3.83 | 4.69 | 达必佳(短效) |
| 普丽康     | 150   | 2175   | 12 | 2017-10-09 | 15.00 | 2.93 | 4.14 | 达菲林(短效) |
| 果纳芬     | 150   | 1800   | 12 | 2017-09-07 | 32.00 | 0.97 | 3.38 | 达必佳(短效) |
| 果纳芬     | 150   | 1500   | 10 | 2017-10-10 | 38.00 | 1.91 | 3.02 | 达菲林(短效) |
| 普丽康     | 150   | 1950   | 11 | 2017-09-11 | 30.00 | 1.73 | 3.49 | 达菲林(短效) |
| 果纳芬     | 150   | 2175   | 10 | 2017-09-14 | 10.00 | 1.34 | 4.17 | 达必佳(短效) |
| HMG,普丽康 | 225   | 2625   | 11 | 2017-08-30 | 32.00 | 1.34 | 3.21 | 达必佳(短效) |
| HMG,果纳芬 | 225   | 2250   | 10 | 2017-10-12 | 33.00 | 0.86 | 2.47 | 达菲林(短效) |
| 普丽康     | 150   | 1650   | 10 | 2017-10-02 | 35.00 | 4.56 | 3.74 | 达菲林(短效) |
| 普丽康     | 150   | 1950   | 11 | 2017-09-18 | 23.00 | 1.52 | 3.45 | 达必佳(短效) |
| 普丽康     | 200   | 2750   | 12 | 2017-10-05 | 16.00 | 1.84 | 3.77 | 达必佳(短效) |
| 普丽康     | 200   | 3725   | 14 | 2017-09-20 | 16.00 | 2.60 | 4.03 | 达必佳(短效) |
| 普丽康     | 150   | 2850   | 13 | 2017-10-26 | 46.00 | 3.51 | 4.71 | 达必佳(短效) |
| 普丽康     | 200   | 2100   | 10 | 2017-10-09 | 40.00 | 1.60 | 5.57 | 达菲林(短效) |
| 普丽康     | 100   | 900    | 8  | 2017-10-10 | 21.00 | 1.69 | 3.36 | 达菲林(短效) |
| 果纳芬     | 150   | 1650   | 11 | 2017-10-04 | 42.00 | 3.24 | 4.27 | 达菲林(短效) |
| HMG,普丽康 | 225   | 2250   | 11 | 2017-09-25 | 18.00 | 1.02 | 2.85 | 达菲林(短效) |
| 果纳芬     | 150   | 3000   | 15 | 2017-10-13 | 31.00 | 2.60 | 3.04 | 达必佳(短效) |
| 普丽康     | 150   | 1950   | 10 | 2017-09-26 | 32.00 | 1.41 | 4.61 | 达菲林(短效) |
| HMG,普丽康 | 275   | 3000   | 11 | 2017-10-02 | 12.00 | 2.77 | 2.73 | 达菲林(短效) |
| 果纳芬     | 150   | 2250   | 11 | 2017-10-10 | 17.00 | 1.93 | 2.54 | 达菲林(短效) |
| 果纳芬     | 150   | 2850   | 12 | 2017-10-12 | 16.00 | 2.40 | 3.84 | 达菲林(短效) |
| 果纳芬     | 150   | 1500   | 9  | 2017-09-15 | 43.00 | 1.07 | 2.72 | 达菲林(短效) |
| 果纳芬     | 150   | 2025   | 11 | 2017-09-28 | 39.00 | 1.33 | 3.62 | 达菲林(短效) |
| 普丽康     | 100   | 1650   | 12 | 2017-10-17 | 33.00 | 1.37 | 5.54 | 达必佳(短效) |
| HMG,普丽康 | 225   | 3300   | 12 | 2017-10-09 | 13.00 | 2.09 | 3.95 | 达菲林(短效) |
| 普丽康     | 150   | 3525   | 14 | 2017-10-25 | 36.00 | 2.43 | 4.20 | 达必佳(短效) |
| 普丽康     | 200   | 2550   | 12 | 2017-11-14 | 25.00 | 1.78 | 3.30 | 达必佳(短效) |
| HMG,普丽康 | 175   | 5775   | 17 | 2017-11-09 | 20.00 | 1.78 | 4.49 | 达必佳(短效) |
| HMG,普丽康 | 275   | 2925   | 10 | 2017-10-10 | 21.00 | 2.12 | 2.80 | 达必佳(短效) |
| HMG,果纳芬 | 300   | 3600   | 12 | 2017-12-08 | 35.00 | 0.97 | 4.85 | 达菲林(短效) |
| 普丽康     | 150   | 2475   | 12 | 2017-10-27 | 22.00 | 1.91 | 4.93 | 达必佳(短效) |
| 普丽康     | 150   | 1650   | 10 | 2017-10-10 | 27.00 | 1.81 | 2.68 | 达菲林(短效) |
| 果纳芬     | 150   | 2250   | 12 | 2017-10-11 | 30.00 | 2.65 | 5.15 | 达菲林(短效) |
| 普丽康     | 150   | 1350   | 9  | 2017-10-27 | 50.00 | 1.84 | 5.94 | 达必佳(短效) |
| 果纳芬     | 150   | 1575   | 11 | 2017-10-12 | 18.00 | 1.61 | 3.68 | 达菲林(短效) |
| 果纳芬     | 225   | 2475   | 11 | 2017-11-30 | 37.00 | 1.50 | 3.83 | 达菲林(长效) |
| 果纳芬     | 150   | 2400   | 12 | 2017-10-16 | 50.00 | 3.13 | 2.81 | 达必佳(短效) |
| HMG,普丽康 | 275   | 3775   | 12 | 2017-10-18 | 22.00 | 3.83 | 3.11 | 达必佳(短效) |
| HMG,普丽康 | 300   | 4900   | 13 | 2017-11-13 | 42.00 | 2.27 | 4.06 | 达必佳(短效) |
| 果纳芬     | 112.5 | 1050   | 9  | 2017-10-30 | 15.00 | 1.15 | 2.41 | 达必佳(短效) |
| 普丽康     | 200   | 2450   | 10 | 2017-10-25 | 13.00 | 1.47 | 1.04 | 达必佳(短效) |
| 果纳芬     | 150   | 1312.5 | 8  | 2017-11-07 | 19.00 | 1.74 | 3.46 | 达必佳(短效) |
| HMG,普丽康 | 275   | 3075   | 9  | 2017-12-21 | 17.00 | 2.82 | 5.71 | 达必佳(短效) |
| HMG,普丽康 | 225   | 2325   | 11 | 2017-10-20 | 20.00 | 1.69 | 2.78 | 达菲林(短效) |
| 普丽康     | 150   | 2025   | 11 | 2017-10-23 | 28.00 | 4.55 | 5.07 | 达必佳(短效) |

|         |       |        |    |            |       |      |      |         |
|---------|-------|--------|----|------------|-------|------|------|---------|
| HMG,普丽康 | 175   | 5175   | 15 | 2017-11-09 | 37.00 | 1.01 | 3.01 | 达必佳(短效) |
| 普丽康     | 150   | 1575   | 9  | 2017-10-27 | 11.00 | 3.77 | 4.55 | 达必佳(短效) |
| 普丽康     | 150   | 1875   | 11 | 2017-10-31 | 29.00 | 1.48 | 3.43 | 达必佳(短效) |
| 普丽康     | 200   | 2175   | 11 | 2017-11-01 | 37.00 | 1.19 | 3.25 | 达必佳(短效) |
| 普丽康     | 150   | 1875   | 11 | 2017-10-26 | 48.00 | 2.06 | 3.77 | 达必佳(短效) |
| 普丽康     | 150   | 1350   | 9  | 2017-10-13 | 31.00 | 2.18 | 3.73 | 达菲林(短效) |
| 果纳芬     | 150   | 1500   | 10 | 2017-11-16 | 44.00 | 1.39 | 3.65 | 达必佳(短效) |
| 普丽康     | 150   | 1650   | 10 | 2017-10-27 | 16.00 | 1.45 | 3.25 | 达必佳(短效) |
| 普丽康     | 150   | 1650   | 11 | 2017-11-16 | 32.00 | 1.80 | 3.60 | 达必佳(短效) |
| 普丽康     | 150   | 2025   | 11 | 2017-10-31 | 43.00 | 3.44 | 4.93 | 达必佳(短效) |
| 普丽康     | 100   | 1725   | 12 | 2017-11-01 | 11.00 | 2.73 | 3.74 | 达必佳(短效) |
| HMG     | 150   | 2850   | 12 | 2017-11-01 | 45.00 | 2.22 | 6.15 | 达必佳(短效) |
| HMG,普丽康 | 275   | 3050   | 10 | 2017-10-23 | 21.00 | 1.76 | 3.20 | 达必佳(短效) |
| 普丽康     | 150   | 2400   | 12 | 2017-11-02 | 46.00 | 2.71 | 4.91 | 达必佳(短效) |
| HMG,普丽康 | 225   | 3375   | 12 | 2018-02-12 | 19.00 | 1.59 | 3.64 | 达菲林(短效) |
| 普丽康     | 200   | 2750   | 11 | 2017-11-27 | 14.00 | 1.76 | 4.05 | 达必佳(短效) |
| 普丽康     | 150   | 2250   | 12 | 2017-12-08 | 12.00 | 1.21 | 3.76 | 达菲林(短效) |
| HMG,果纳芬 | 225   | 2250   | 10 | 2017-11-02 | 17.00 | 1.66 | 2.60 | 达菲林(短效) |
| HMG,果纳芬 | 225   | 2775   | 12 | 2017-12-07 | 24.00 | 1.86 | 3.87 | 达菲林(短效) |
| 普丽康     | 200   | 1800   | 9  | 2017-11-06 | 15.00 | 1.58 | 4.60 | 达菲林(短效) |
| HMG,普丽康 | 275   | 3650   | 13 | 2017-11-08 | 32.00 | 2.08 | 5.19 | 达必佳(短效) |
| 普丽康     | 150   | 1350   | 9  | 2017-11-09 | 36.00 | 1.95 | 3.93 | 达必佳(短效) |
| 普丽康     | 150   | 2250   | 12 | 2017-10-30 | 24.00 | 2.52 | 4.36 | 达必佳(短效) |
| 普丽康     | 150   | 1500   | 10 | 2017-11-13 | 33.00 | 1.81 | 3.73 | 达必佳(短效) |
| HMG,果纳芬 | 300   | 3150   | 11 | 2017-12-07 | 11.00 | 1.18 | 5.23 | 达菲林(短效) |
| 普丽康     | 150   | 1800   | 11 | 2017-11-13 | 24.00 | 2.38 | 2.29 | 达必佳(短效) |
| HMG,普丽康 | 225   | 4275   | 14 | 2017-11-14 | 17.00 | 1.78 | 4.34 | 达菲林(短效) |
| 果纳芬     | 150   | 1350   | 9  | 2017-11-14 | 34.00 | 4.36 | 5.48 | 达必佳(短效) |
| 果纳芬     | 150   | 1650   | 11 | 2017-12-01 | 31.00 | 1.61 | 4.48 | 达必佳(短效) |
| HMG,果纳芬 | 225   | 2025   | 9  | 2017-11-20 | 28.00 | 1.73 | 4.89 | 达必佳(短效) |
| 普丽康     | 150   | 2850   | 11 | 2017-11-28 | 12.00 | 2.06 | 5.33 | 达必佳(短效) |
| HMG,果纳芬 | 225   | 1950   | 9  | 2017-12-07 | 20.00 | 1.57 | 4.56 | 达菲林(短效) |
| HMG,果纳芬 | 225   | 2775   | 11 | 2017-11-20 | 41.00 | 2.58 | 5.23 | 达必佳(短效) |
| HMG,普丽康 | 175   | 2350   | 13 | 2017-11-07 | 49.00 | 1.26 | 1.90 | 达必佳(短效) |
| HMG     | 150   | 5550   | 18 | 2017-11-08 | 41.00 | 1.93 | 6.42 | 达必佳(短效) |
| 果纳芬     | 150   | 1650   | 10 | 2017-11-28 | 43.00 | 2.73 | 5.29 | 达菲林(短效) |
| HMG,普丽康 | 175   | 2925   | 12 | 2017-11-29 | 36.00 | 1.11 | 3.81 | 达菲林(短效) |
| HMG,普丽康 | 225   | 3825   | 12 | 2017-12-27 | 31.00 | 3.04 | 4.38 | 达菲林(短效) |
| HMG,普丽康 | 275   | 2850   | 9  | 2017-12-01 | 17.00 | 1.58 | 1.19 | 达必佳(短效) |
| 果纳芬     | 112.5 | 1237.5 | 11 | 2017-12-19 | 10.00 | 1.66 | 2.56 | 达必佳(短效) |
| HMG,普丽康 | 275   | 3200   | 10 | 2017-12-07 | 14.00 | 1.64 | 4.60 | 达必佳(短效) |
| 普丽康     | 200   | 2000   | 8  | 2017-12-04 | 38.00 | 1.72 | 2.20 | 达必佳(短效) |
| HMG,果纳芬 | 225   | 2100   | 10 | 2017-12-08 | 17.00 | 2.29 | 4.69 | 达必佳(短效) |
| HMG,普丽康 | 225   | 2925   | 12 | 2017-12-08 | 11.00 | 1.10 | 4.56 | 达菲林(短效) |
| 果纳芬     | 150   | 1350   | 9  | 2017-12-11 | 41.00 | 0.95 | 2.51 | 达菲林(短效) |
| HMG,果纳芬 | 225   | 2700   | 11 | 2017-12-29 | 22.00 | 0.84 | 2.86 | 达菲林(短效) |
| 果纳芬     | 112.5 | 1050   | 8  | 2017-12-12 | 19.00 | 1.67 | 3.67 | 达必佳(短效) |
| 普丽康     | 200   | 1850   | 10 | 2017-12-13 | 16.00 | 3.63 | 3.39 | 达菲林(短效) |
| 果纳芬     | 150   | 1650   | 11 | 2017-12-14 | 24.00 | 1.32 | 5.00 | 达菲林(短效) |
| HMG,果纳芬 | 300   | 3675   | 12 | 2017-12-14 | 38.00 | 2.78 | 4.11 | 达菲林(短效) |

|         |       |        |    |            |       |      |      |         |
|---------|-------|--------|----|------------|-------|------|------|---------|
| HMG,果纳芬 | 225   | 4275   | 13 | 2017-12-15 | 20.00 | 1.70 | 4.21 | 达必佳(短效) |
| HMG,普丽康 | 300   | 3525   | 11 | 2018-01-02 | 34.00 | 1.48 | 3.08 | 达菲林(短效) |
| HMG,普丽康 | 225   | 3075   | 12 | 2018-01-02 | 28.00 | 3.09 | 6.87 | 达菲林(短效) |
| 果纳芬     | 150   | 2625   | 11 | 2018-01-02 | 37.00 | 2.35 | 5.32 | 达菲林(短效) |
| HMG,普丽康 | 225   | 2025   | 9  | 2018-02-12 | 33.00 | 1.30 | 4.49 | 达菲林(短效) |
| HMG,果纳芬 | 225   | 3600   | 14 | 2017-12-18 | 24.00 | 2.04 | 4.20 | 达菲林(短效) |
| 普丽康     | 150   | 1875   | 12 | 2017-12-18 | 20.00 | 1.44 | 5.13 | 达菲林(短效) |
| 果纳芬     | 150   | 450    | 3  | 2017-12-22 | 34.00 | 4.66 | 5.06 | 达必佳(短效) |
| HMG,普丽康 | 225   | 3075   | 14 | 2017-12-25 | 22.00 | 4.54 | 2.75 | 达菲林(短效) |
| HMG,普丽康 | 275   | 3100   | 12 | 2018-01-04 | 16.00 | 2.28 | 6.01 | 达菲林(短效) |
| HMG,普丽康 | 225   | 6075   | 20 | 2017-12-27 | 43.00 | 1.37 | 4.44 | 达菲林(短效) |
| 普丽康     | 200   | 1800   | 9  | 2017-12-18 | 27.00 | 1.60 | 3.65 | 达菲林(短效) |
| 普丽康     | 150   | 1650   | 9  | 2017-12-31 | 29.00 | 2.95 | 5.25 | 达菲林(短效) |
| 果纳芬     | 150   | 1800   | 12 | 2017-12-26 | 25.00 | 2.86 | 3.84 | 达菲林(短效) |
| 普丽康     | 150   | 1425   | 10 | 2017-12-27 | 22.00 | 1.24 | 3.48 | 达菲林(短效) |
| HMG,果纳芬 | 300   | 4125   | 14 | 2017-12-28 | 11.00 | 0.88 | 4.03 | 达菲林(短效) |
| HMG,果纳芬 | 300   | 3525   | 11 | 2017-12-11 | 16.00 | 1.41 | 2.48 | 达必佳(短效) |
| 果纳芬     | 150   | 1275   | 7  | 2018-03-05 | 43.00 | 1.37 | 4.44 | 达菲林(短效) |
| 果纳芬     | 150   | 1837.5 | 10 | 2018-01-11 | 15.00 | 1.52 | 2.23 | 达必佳(短效) |
| HMG,果纳芬 | 225   | 3037.5 | 12 | 2017-12-25 | 14.00 | 1.73 | 3.71 | 达必佳(短效) |
| HMG     | 225   | 4500   | 12 | 2018-02-12 | 39.00 | 1.68 | 5.87 | 达菲林(短效) |
| HMG,果纳芬 | 150   | 4350   | 14 | 2018-02-21 | 31.00 | 1.07 | 4.57 | 达菲林(短效) |
| HMG,果纳芬 | 225   | 2025   | 9  | 2018-01-15 | 18.00 | 1.40 | 5.42 | 达菲林(短效) |
| HMG,果纳芬 | 187.5 | 1837.5 | 8  | 2018-01-02 | 32.00 | 4.70 | 4.32 | 达必佳(短效) |
| 普丽康     | 100   | 1500   | 11 | 2018-01-15 | 16.00 | 1.57 | 3.76 | 达菲林(短效) |
| 果纳芬     | 150   | 1350   | 9  | 2018-01-04 | 26.00 | 1.92 | 3.39 | 达菲林(短效) |
| 普丽康     | 200   | 2200   | 11 | 2018-01-31 | 17.00 | 1.90 | 6.66 | 达菲林(短效) |



| 备调节启动)剂 | 调节启动)总剂 | 调节启动)总天 | HCG日       | HCGE2   | HCGLH | HCGP  | 取卵日期       | (DO)获卵总数 |
|---------|---------|---------|------------|---------|-------|-------|------------|----------|
| 0.05    | 1.1     | 22      | 2014-04-27 | 3508.00 | 0.06  | 1.32  | 2014-04-29 | 12       |
| 0.1     | 1.1     | 17      | 2014-07-20 | 4187.00 | 0.46  | 1.07  | 2014-07-22 | 15       |
| 0.1     | 1.95    | 22      | 2014-09-04 | 4936.00 | 3.53  | 1.83  | 2014-09-06 | 16       |
| 0.9     | 2.1     | 22      | 2014-08-09 | 5060.00 | 0.82  | 1.45  | 2014-08-11 | 13       |
| 0.1     | 1.4     | 21      | 2014-09-17 | 2189.00 | 1.59  | 1.21  | 2014-09-19 | 2        |
| 0.1     | 1.2     | 17      | 2014-09-25 | 1674.00 | 0.68  | 0.63  | 2014-09-27 | 5        |
| 0.1     | 1.45    | 22      | 2014-11-13 | 2871.00 | 3.43  | 0.73  | 2014-11-15 | 12       |
| 0.1     | 1.2     | 17      | 2015-09-18 | 5.62    | 0.18  | 1.41  | 2015-09-20 | 10       |
| 0.1     | 1.1     | 15      | 2016-08-04 | 5060.00 | 1.94  | 1.41  | 2016-08-06 | 29       |
| 0.1     | 1.3     | 21      | 2015-07-25 | 3806.00 | 0.40  | 2.28  | 2015-07-27 | 5        |
| 0.1     | 1.3     | 19      | 2015-03-28 | 1920.00 | 0.32  | 2.03  | 2015-03-30 | 12       |
| 0.1     | 1.32    | 21      | 2015-07-05 | 2960.00 | 0.54  | 1.34  | 2015-07-07 | 8        |
| 0.1     | 1.2     | 17      | 2015-08-13 | 3345.00 | 0.39  | 1.74  | 2015-08-15 | 19       |
| 0.1     | 1.38    | 25      | 2015-06-27 | 5011.00 | 0.76  | 0.81  | 2015-06-29 | 25       |
| 0.1     | 1.14    | 17      | 2015-08-04 | 1611.00 | 0.22  | 1.12  | 2015-08-06 | 6        |
| 0.1     | 1.29    | 22      | 2015-06-21 | 5110.00 | 0.12  | 1.42  | 2015-06-23 | 19       |
| 0.05    | 0.95    | 19      | 2015-07-05 | 2115.00 | 0.38  | 1.58  | 2015-07-07 | 8        |
| 0.1     | 1.18    | 19      | 2015-06-25 | 4375.00 | 0.13  | 2.02  | 2015-06-27 | 10       |
| 0.1     | 1.14    | 20      | 2015-07-22 | 792.00  | 4.33  | 1.22  | 2015-07-24 | 2        |
| 0.1     | 1.14    | 17      | 2015-07-21 | 3336.00 | 0.49  | 2.84  | 2015-07-23 | 20       |
| 0.1     | 1.2     | 17      | 2016-01-06 | 1772.00 | 0.43  | 0.97  | 2016-01-08 | 11       |
| 0.1     | 1.2     | 17      | 2015-10-30 | 2172.00 | 1.75  | 1.80  | 2015-11-01 | 9        |
| 0.1     | 1.64    | 18      | 2015-07-10 | 4250.00 | 0.39  | 2.29  | 2015-07-12 | 11       |
| 0.1     | 1.19    | 18      | 2015-07-13 | 5110.00 | 0.73  | 0.91  | 2015-07-15 | 17       |
| 0.1     | 1.1     | 16      | 2015-07-20 | 2594.00 | 0.58  | 0.90  | 2015-07-22 | 5        |
| 0.1     | 1.2     | 17      | 2015-09-28 | 4616.00 | 1.62  | 1.02  | 2015-09-30 | 18       |
| 0.1     | 1.28    | 21      | 2015-07-01 | 2199.00 | 0.19  | 1.04  | 2015-07-03 | 6        |
| 0.1     | 1.28    | 21      | 2015-07-14 | 3107.00 | 0.26  | 0.59  | 2015-07-16 | 13       |
| 0.1     | 1.19    | 18      | 2015-07-16 | 5110.00 | 1.37  | 1.38  | 2015-07-18 | 24       |
| 0.1     | 1.15    | 16      | 2015-08-17 | 5110.00 | 1.22  | 1.04  | 2015-08-19 | 15       |
| 0.1     | 1.4     | 21      | 2015-07-28 | 1955.00 | 1.12  | 1.11  | 2015-07-30 | 8        |
| 0.1     | 1.2     | 17      | 2015-08-15 | 3155.00 | 0.63  | 0.61  | 2015-08-17 | 9        |
| 0.1     | 1.25    | 18      | 2015-08-12 | 1896.00 | 0.32  | 0.99  | 2015-08-14 | 7        |
| 0       | 1.28    | 21      | 2015-07-12 | 1331.00 | 0.43  | 2.15  | 2015-07-14 | 10       |
| 0.1     | 1.19    | 18      | 2015-07-14 | 4209.00 | 0.51  | 1.04  | 2015-07-16 | 0        |
| 0.1     | 1.1     | 15      | 2015-08-20 | 2266.00 | 1.06  | 0.85  | 2015-08-22 | 7        |
| 0.1     | 1.25    | 18      | 2015-08-08 | 2364.00 | 2.41  | 1.67  | 2015-08-10 | 3        |
| 0.1     | 1.2     | 17      | 2015-09-10 | 1326.00 | 0.89  | 1.01  | 2015-09-12 | 11       |
| 0.1     | 1.2     | 17      | 2015-07-22 | 2206.00 | 0.26  | 1.91  | 2015-07-24 | 11       |
| 0.1     | 1.14    | 17      | 2015-07-26 | 2291.00 | 0.76  | 1.14  | 2015-07-28 | 7        |
| 0.1     | 1.1     | 16      | 2015-07-22 | 4228.00 | 0.45  | 1.81  | 2015-07-24 | 15       |
| 0.1     | 1.2     | 17      | 2015-08-21 | 3673.00 | 1.40  | 28.00 | 2015-08-23 | 9        |
| 0.1     | 1.2     | 17      | 2015-08-09 | 2371.00 | 0.23  | 1.58  | 2015-08-11 | 12       |
| 0.1     | 1.19    | 18      | 2015-08-04 | 3176.00 | 0.64  | 1.29  | 2015-08-06 | 7        |
| 0.1     | 1.6     | 25      | 2015-08-07 | 4702.00 | 5.08  | 1.15  | 2015-08-09 | 8        |
| 0.1     | 1.25    | 18      | 2015-09-13 | 3036.00 | 0.21  | 1.55  | 2015-09-15 | 16       |
| 0.1     | 1.19    | 18      | 2015-08-14 | 568.00  | 0.37  | 0.32  | 2015-08-16 | 1        |
| 0.1     | 1.2     | 17      | 2015-08-24 | 2008.00 | 2.12  | 1.64  | 2015-08-26 | 8        |
| 0.1     | 1.2     | 17      | 2013-12-12 | 4962.00 | 1.78  | 1.74  | 2013-12-14 |          |

|     |      |    |            |         |      |      |            |    |
|-----|------|----|------------|---------|------|------|------------|----|
| 0.1 | 1.14 | 17 | 2015-08-08 | 296.00  | 0.83 | 0.66 | 2015-08-10 | 3  |
| 0.1 | 1.15 | 16 | 2015-09-06 | 3381.00 | 0.53 | 0.75 | 2015-09-08 | 14 |
| 0.1 | 1.2  | 17 | 2015-08-30 | 2326.00 | 0.56 | 0.49 | 2015-09-01 | 11 |
| 0.1 | 1.2  | 17 | 2015-12-02 | 1562.00 | 0.56 | 1.87 | 2015-12-04 | 6  |
| 0.1 | 1.05 | 14 | 2015-09-13 | 3445.00 | 0.42 | 1.22 | 2015-09-15 | 21 |
| 0.1 | 1.2  | 17 | 2015-09-11 | 2217.00 | 0.59 | 0.89 | 2015-09-13 | 12 |
| 0.1 | 1.2  | 17 | 2015-08-24 | 4493.00 | 3.43 | 1.47 | 2015-08-26 | 7  |
| 0.1 | 1.35 | 20 | 2015-10-06 | 5110.00 | 2.13 | 3.26 | 2015-10-08 | 25 |
| 0.1 | 1.2  | 17 | 2015-08-17 | 687.00  | 0.27 | 0.08 | 2015-08-19 | 3  |
| 0.1 | 1.45 | 22 | 2015-08-29 | 4194.00 | 1.86 | 0.57 | 2015-08-31 | 10 |
| 0.1 | 1.2  | 17 | 2015-09-11 | 3822.00 | 1.08 | 1.15 | 2015-09-13 | 20 |
| 0.1 | 1.15 | 16 | 2015-09-16 | 3732.00 | 0.85 | 1.01 | 2015-09-18 | 20 |
| 0.1 | 1.15 | 16 | 2015-08-24 | 2948.00 | 1.01 | 0.71 | 2015-08-26 | 7  |
| 0.1 | 1.25 | 18 | 2015-09-15 | 2943.00 | 0.72 | 1.15 | 2015-09-17 | 18 |
| 0.1 | 1.15 | 16 | 2015-10-12 | 3334.00 | 3.20 | 2.31 | 2015-10-14 | 13 |
| 0.1 | 1.2  | 17 | 2015-09-09 | 242.00  | 0.55 | 0.46 | 2015-09-11 | 5  |
| 0.1 | 1.2  | 17 | 2015-09-21 | 1294.00 | 1.25 | 1.08 | 2015-09-23 | 6  |
| 0.1 | 1.2  | 17 | 2015-10-07 | 5110.00 | 0.69 | 2.04 | 2015-10-09 | 19 |
| 0.1 | 1.15 | 16 | 2015-08-17 | 2882.00 | 0.96 | 2.67 | 2015-08-19 | 12 |
| 0.1 | 1.3  | 19 | 2015-09-11 | 1045.00 | 0.34 | 0.47 | 2015-09-13 | 3  |
| 0.1 | 1.3  | 19 | 2015-10-08 | 4775.00 | 0.12 | 1.78 | 2015-10-10 | 16 |
| 0.1 | 1.2  | 17 | 2015-09-09 | 3805.00 | 1.45 | 0.66 | 2015-09-11 | 16 |
| 0.1 | 1.1  | 15 | 2015-09-27 | 4901.00 | 1.70 | 2.01 | 2015-09-29 | 13 |
| 0.1 | 1.2  | 17 | 2015-09-16 | 1974.00 | 0.50 | 0.85 | 2015-09-18 | 24 |
| 0.1 | 1.2  | 17 | 2015-10-07 | 413.00  | 0.51 | 0.36 | 2015-10-09 | 14 |
| 0.1 | 1.25 | 18 | 2015-09-13 | 2742.00 | 1.18 | 1.05 | 2015-09-15 | 7  |
| 0.1 | 1.25 | 17 | 2015-09-18 | 827.00  | 0.33 | 2.11 | 2015-09-20 | 4  |
| 0.1 | 1.2  | 17 | 2015-09-14 | 5110.00 | 0.16 | 3.21 | 2015-09-16 | 33 |
| 0.1 | 1.2  | 17 | 2015-09-28 | 3408.00 | 0.90 | 3.07 | 2015-09-30 | 7  |
| 0.1 | 1.2  | 17 | 2015-09-18 | 780.00  | 0.62 | 0.49 | 2015-09-20 | 5  |
| 0.1 | 1.25 | 18 | 2015-11-02 | 1919.00 | 0.26 | 1.59 | 2015-11-04 | 7  |
| 0.1 | 1.2  | 17 | 2015-10-08 | 3703.00 | 0.60 | 1.45 | 2015-10-10 | 20 |
| 0.1 | 1.3  | 19 | 2015-10-15 | 1196.00 | 1.45 | 1.35 | 2015-10-17 | 1  |
| 0.1 | 1.2  | 17 | 2015-10-18 | 4505.00 | 0.55 | 2.54 | 2015-10-20 | 24 |
| 0.1 | 1.25 | 18 | 2015-09-18 | 2025.00 | 1.08 | 1.64 | 2015-09-20 | 16 |
| 0.1 | 1.2  | 17 | 2015-09-21 | 2960.00 | 0.31 | 0.47 | 2015-09-23 | 9  |
| 0.1 | 1.2  | 17 | 2015-11-11 | 3223.00 | 1.12 | 2.70 | 2015-11-13 | 12 |
| 0.1 | 1.2  | 17 | 2015-11-09 | 2836.00 | 2.29 | 2.28 | 2015-11-11 | 6  |
| 0.1 | 1.6  | 16 | 2015-09-04 | 441.00  | 5.66 | 0.68 | 2015-09-04 | 1  |
| 0.1 | 1.2  | 17 | 2015-09-27 | 4140.00 | 1.38 | 1.65 | 2015-09-29 | 6  |
| 0.1 | 1.2  | 17 | 2015-11-13 | 4079.00 | 0.63 | 2.36 | 2015-11-15 | 15 |
| 0.1 | 1.2  | 17 | 2015-11-06 | 1370.00 | 0.27 | 2.14 | 2015-11-08 | 15 |
| 0.1 | 1.05 | 14 | 2015-10-23 | 3964.00 | 1.64 | 1.77 | 2015-10-25 | 16 |
| 0.1 | 1.7  | 18 | 2015-10-02 | 2129.00 | 0.47 | 2.17 | 2015-10-04 | 23 |
| 0.1 | 1.2  | 17 | 2015-10-24 | 4433.00 | 0.74 | 2.31 | 2015-10-26 | 7  |
| 0.1 | 1.05 | 14 | 2015-11-08 | 4385.00 | 1.02 | 1.09 | 2015-11-10 | 17 |
| 0.1 | 1.2  | 17 | 2015-11-10 | 2505.00 | 0.51 | 2.48 | 2015-11-12 | 8  |
| 0.1 | 1.05 | 14 | 2015-10-23 | 2396.00 | 1.23 | 1.31 | 2015-10-25 | 19 |
| 0.1 | 1.2  | 17 | 2015-12-24 | 4599.00 | 0.33 | 1.42 | 2015-12-26 | 11 |
| 0.1 | 1.15 | 16 | 2015-10-12 | 3077.00 | 0.67 | 1.27 | 2015-10-14 | 14 |

|      |      |    |            |         |      |      |            |    |
|------|------|----|------------|---------|------|------|------------|----|
| 0.1  | 1.2  | 17 | 2015-10-22 | 2493.00 | 1.03 | 0.69 | 2015-10-24 | 13 |
| 0.1  | 1.1  | 15 | 2016-06-19 | 3928.00 | 1.31 | 0.96 | 2016-06-21 | 11 |
| 0.1  | 1.2  | 17 | 2016-01-04 | 4901.00 | 1.92 | 1.17 | 2016-01-06 | 13 |
| 0.1  | 1.2  | 17 | 2015-10-29 | 3187.00 | 2.19 | 2.39 | 2015-10-31 | 15 |
| 0.1  | 1.2  | 17 | 2015-09-27 | 1371.00 | 0.47 | 0.74 | 2015-09-29 | 4  |
| 0.1  | 1.2  | 17 | 2015-11-30 | 4901.00 | 1.47 | 2.33 | 2015-12-02 | 22 |
| 0.1  | 1.2  | 17 | 2015-11-21 | 2171.00 | 1.05 | 0.93 | 2015-11-23 | 9  |
| 0.1  | 1.2  | 17 | 2015-10-19 | 5110.00 | 0.19 | 2.12 | 2015-10-21 | 22 |
| 0.1  | 1.2  | 17 | 2015-11-10 | 5110.00 | 0.76 | 1.85 | 2015-11-12 | 24 |
| 0.1  | 1.2  | 17 | 2015-11-06 | 4901.00 | 1.27 | 1.77 | 2015-11-08 | 17 |
| 0.1  | 1.2  | 17 | 2015-11-08 | 1898.00 | 0.83 | 0.95 | 2015-11-10 | 8  |
| 0.1  | 1.2  | 17 | 2015-11-16 | 2999.00 | 2.09 | 1.47 | 2015-11-18 | 15 |
| 0.1  | 1.2  | 17 | 2015-11-12 | 4082.00 | 0.93 | 1.44 | 2015-11-14 | 10 |
| 0.1  | 1.2  | 17 | 2015-11-09 | 3271.00 | 0.98 | 2.56 | 2015-11-11 | 24 |
| 0.05 | 0.8  | 16 | 2015-12-14 | 1636.00 | 2.14 | 2.50 | 2015-12-16 | 0  |
| 0.1  | 1.2  | 17 | 2015-11-04 | 4743.00 | 0.44 | 1.17 | 2015-11-06 | 12 |
| 0.1  | 1.2  | 17 | 2015-11-06 | 4559.00 | 1.43 | 0.80 | 2015-11-08 | 15 |
| 0.1  | 1.2  | 17 | 2015-10-25 | 1669.00 | 0.38 | 1.52 | 2015-10-27 | 8  |
| 0.1  | 1.2  | 17 | 2015-10-17 | 1347.00 | 0.80 | 0.99 | 2015-10-19 | 9  |
| 0.1  | 1.3  | 19 | 2015-11-15 | 181.00  | 0.24 | 0.45 | 2015-11-17 | 2  |
| 0.1  | 1.2  | 17 | 2015-12-02 | 2905.00 | 0.74 | 1.47 | 2015-12-04 | 18 |
| 7    | 49.7 | 21 | 2015-12-08 | 2308.00 | 0.63 | 1.78 | 2015-12-10 | 9  |
| 0.1  | 1.2  | 17 | 2015-11-30 | 2511.00 | 0.80 | 1.83 | 2015-12-02 | 10 |
| 0.1  | 1.15 | 16 | 2015-11-15 | 3204.00 | 0.14 | 1.02 | 2015-11-17 | 15 |
| 0.1  | 1.2  | 17 | 2015-11-16 | 2277.00 | 2.04 | 4.76 | 2015-11-18 | 11 |
| 0.1  | 1.2  | 17 | 2015-12-02 | 3820.00 | 0.62 | 0.91 | 2015-12-04 | 23 |
| 0.1  | 1.2  | 17 | 2015-11-18 | 2795.00 | 0.69 | 0.92 | 2015-11-20 | 20 |
| 0.1  | 1.2  | 17 | 2015-12-21 | 4901.00 | 0.59 | 1.81 | 2015-12-23 | 14 |
| 0.1  | 1.05 | 14 | 2015-11-25 | 4901.00 | 0.76 | 1.63 | 2015-11-27 | 24 |
| 0.1  | 1.5  | 23 | 2015-12-05 | 1669.00 | 0.55 | 1.37 | 2015-12-07 | 11 |
| 0.1  | 1.2  | 17 | 2015-12-16 | 4459.00 | 0.30 | 1.24 | 2015-12-18 | 23 |
| 0.1  | 1.2  | 17 | 2015-12-31 | 3349.00 | 0.13 | 1.81 | 2016-01-02 | 10 |
| 0.1  | 1.2  | 17 | 2015-12-31 | 1828.00 | 0.44 | 1.35 | 2016-01-02 | 8  |
| 0.1  | 1.15 | 16 | 2015-11-29 | 1744.00 | 0.40 | 2.48 | 2015-12-01 | 12 |
| 0.1  | 1.2  | 17 | 2015-12-05 | 1328.00 | 0.62 | 1.60 | 2015-12-07 | 15 |
| 0.1  | 1.2  | 17 | 2015-11-30 | 2406.00 | 0.29 | 2.79 | 2015-12-02 | 18 |
| 0.1  | 1.05 | 14 | 2015-12-07 | 4901.00 | 0.64 | 1.36 | 2015-12-09 | 14 |
| 0.1  | 1.2  | 17 | 2016-01-05 | 3812.00 | 0.67 | 1.42 | 2016-01-07 | 18 |
| 0.1  | 1.2  | 17 | 2015-12-21 | 4901.00 | 2.71 | 1.67 | 2015-12-23 | 17 |
| 0.1  | 1.3  | 19 | 2015-12-02 | 1281.00 | 0.43 | 1.06 | 2015-12-03 | 2  |
| 0.1  | 1.2  | 17 | 2016-01-08 | 4901.00 | 1.01 | 3.28 | 2016-01-10 | 10 |
| 0.1  | 1.5  | 23 | 2016-01-04 | 4901.00 | 3.00 | 1.19 | 2016-01-06 | 13 |
| 0.1  | 1.6  | 25 | 2015-11-30 | 2493.00 | 0.21 | 3.48 | 2015-12-02 | 8  |
| 0.1  | 1.2  | 17 | 2016-01-19 | 4901.00 | 0.41 | 2.37 | 2016-01-21 | 22 |
| 0.1  | 1.2  | 17 | 2015-12-27 | 2284.00 | 0.06 | 0.98 | 2015-12-29 | 11 |
| 0.1  | 1.4  | 21 | 2015-12-27 | 1380.00 | 1.49 | 1.14 | 2015-12-29 | 6  |
| 0.1  | 1.2  | 17 | 2016-01-18 | 3238.00 | 1.23 | 1.75 | 2016-01-20 | 17 |
| 0.1  | 1.2  | 17 | 2015-12-30 | 2089.00 | 0.92 | 1.66 | 2016-01-01 | 7  |
| 0.1  | 1.2  | 17 | 2015-12-11 | 2635.00 | 0.58 | 2.03 | 2015-12-13 | 20 |
| 0.1  | 1.15 | 16 | 2016-01-03 | 3405.00 | 0.74 | 1.17 | 2016-01-05 | 9  |

|      |      |    |            |         |      |      |            |    |
|------|------|----|------------|---------|------|------|------------|----|
| 0.1  | 1.2  | 17 | 2016-01-10 | 4179.00 | 0.88 | 1.63 | 2016-01-12 | 26 |
| 0.1  | 1.2  | 17 | 2016-01-17 | 2231.00 | 1.00 | 0.55 | 2016-01-19 | 11 |
| 0.1  | 1.2  | 17 | 2016-01-27 | 2813.00 | 1.33 | 1.01 | 2016-01-29 | 9  |
| 0.1  | 1.2  | 17 | 2015-01-02 | 4901.00 | 1.46 | 1.10 | 2016-01-04 | 14 |
| 0.1  | 1.3  | 19 | 2016-01-12 | 3587.00 | 0.16 | 1.32 | 2016-01-14 | 15 |
| 0.1  | 1.2  | 17 | 2015-12-28 | 4593.00 | 1.42 | 3.02 | 2015-12-30 | 15 |
| 0.1  | 1.15 | 16 | 2016-01-12 | 1718.00 | 2.16 | 1.30 | 2016-01-14 | 13 |
| 0.1  | 1.2  | 17 | 2015-12-26 | 3045    | 0.34 | 0.81 | 2015-12-28 | 22 |
| 0.1  | 1.2  | 17 | 2016-01-15 | 1296.00 | 1.30 | 1.24 | 2016-01-17 | 13 |
| 0.1  | 1.2  | 17 | 2015-12-28 | 3266.00 | 0.46 | 3.71 | 2015-12-30 | 16 |
| 0.1  | 1.25 | 18 | 2016-01-22 | 3319.00 | 0.19 | 1.38 | 2016-01-24 | 12 |
| 0.1  | 1.2  | 17 | 2016-01-16 | 3118.00 | 0.33 | 1.02 | 2016-01-18 | 25 |
| 0.1  | 2.1  | 21 | 2016-01-08 | 4901.00 | 2.27 | 1.16 | 2016-01-10 | 13 |
| 0.1  | 1.05 | 14 | 2015-12-31 | 4901.00 | 0.50 | 2.32 | 2016-01-02 | 16 |
| 0.1  | 1.2  | 17 | 2015-12-31 | 2114.00 | 1.47 | 1.80 | 2016-01-02 | 8  |
| 0.1  | 1.7  | 24 | 2015-12-28 | 4901.00 | 1.43 | 3.63 | 2015-12-30 | 17 |
| 0.1  | 1.2  | 17 | 2016-01-09 | 4244.00 | 0.35 | 1.10 | 2016-01-11 | 11 |
| 0.1  | 1.25 | 18 | 2016-01-04 | 1220.00 | 0.16 | 0.38 | 2016-01-06 | 15 |
| 0.1  | 1.2  | 17 | 2016-01-20 | 2957.00 | 0.85 | 1.40 | 2016-01-22 | 9  |
| 0.1  | 1.2  | 17 | 2016-01-13 | 3145.00 | 0.25 | 0.81 | 2016-01-15 | 18 |
| 0.1  | 1.2  | 17 | 2015-12-29 | 1371.00 | 1.73 | 1.04 | 2015-12-31 | 6  |
| 0.01 | 0.52 | 16 | 2016-01-25 | 3030.00 | 0.40 | 1.30 | 2016-01-27 | 11 |
| 0.1  | 1.25 | 18 | 2016-01-11 | 3608.00 | 0.19 | 1.36 | 2016-01-13 | 26 |
| 0.1  | 1.2  | 17 | 2016-01-16 | 2430.00 | 1.04 | 1.28 | 2016-01-18 | 13 |
| 0.1  | 1.2  | 17 | 2016-01-21 | 3505.00 | 0.57 | 2.61 | 2016-01-23 | 6  |
| 0.1  | 1.2  | 17 | 2016-01-15 | 4901.00 | 0.36 | 1.99 | 2016-01-17 | 19 |
| 0.1  | 1.2  | 17 | 2016-01-29 | 3135.00 | 0.59 | 1.33 | 2016-01-31 | 17 |
| 0.1  | 2.2  | 17 | 2016-01-21 | 3780.00 | 0.21 | 1.81 | 2016-01-23 | 27 |
| 0.05 | 0.8  | 16 | 2016-01-23 | 2993.00 | 2.05 | 1.10 | 2016-01-25 | 9  |
| 0.1  | 1.2  | 17 | 2016-01-27 | 1471.00 | 0.72 | 1.51 | 2016-01-29 | 9  |
| 0.1  | 1.2  | 17 | 2016-03-25 | 1196.00 | 0.85 | 1.25 | 2016-03-27 | 6  |
| 0.1  | 2.6  | 26 | 2016-01-27 | 3072.00 | 1.77 | 0.93 | 2016-01-29 | 12 |
| 0.1  | 1.1  | 15 | 2016-03-14 | 3422.00 | 1.50 | 0.50 | 2016-03-16 | 15 |
| 0.1  | 1.3  | 19 | 2016-03-15 | 2610.00 | 0.23 | 1.87 | 2016-03-17 | 12 |
| 0.1  | 1.1  | 15 | 2016-03-08 | 1707.00 | 1.26 | 2.79 | 2016-03-10 | 8  |
| 0.1  | 1.7  | 17 | 2016-03-05 | 3800.00 | 4.96 | 1.48 | 2016-03-07 | 13 |
| 0.1  | 1.2  | 20 | 2016-04-07 | 1010.00 | 0.21 | 0.91 | 2016-04-09 | 4  |
| 0.1  | 2.2  | 22 | 2016-02-24 | 2255.00 | 3.32 | 0.61 | 2016-02-26 | 7  |
| 0.05 | 0.9  | 18 | 2016-03-27 | 2644.00 | 1.22 | 1.31 | 2016-03-29 | 4  |
| 0.05 | 1.1  | 22 | 2016-02-28 | 2881.00 | 0.50 | 1.55 | 2016-03-01 | 11 |
| 0.1  | 1.2  | 17 | 2016-04-01 | 3048.00 | 0.58 | 0.64 | 2016-04-03 | 7  |
| 0.1  | 1.35 | 21 | 2016-04-03 | 1899.00 | 0.14 | 0.84 | 2016-04-05 | 8  |
| 0.1  | 1.2  | 17 | 2016-04-03 | 2680.00 | 0.79 | 0.90 | 2016-04-05 | 8  |
| 0.05 | 0.85 | 17 | 2016-03-27 | 2030.00 | 0.96 | 1.41 | 2016-03-29 | 10 |
| 0.1  | 1.2  | 17 | 2016-04-04 | 4448.00 | 0.11 | 1.21 |            | 32 |
| 0.05 | 0.8  | 16 | 2016-04-10 | 1978.00 | 1.45 | 1.48 | 2016-04-12 | 7  |
| 0.1  | 1.05 | 14 | 2016-04-05 | 4638.00 | 0.69 | 0.39 | 2016-04-07 | 18 |
| 0.1  | 1.2  | 17 | 2016-04-03 | 1953.00 | 0.86 | 2.53 | 2016-04-05 | 7  |
| 0.05 | 0.7  | 14 | 2016-04-07 | 4839.00 | 0.48 | 0.67 | 2016-04-09 | 13 |
| 0.05 | 0.75 | 15 | 2016-03-30 | 1771.00 | 0.89 | 0.90 | 2016-04-01 | 6  |

|      |      |    |            |         |      |      |            |    |
|------|------|----|------------|---------|------|------|------------|----|
| 0.1  | 1.1  | 15 | 2016-04-01 | 4839.00 | 1.16 | 0.73 | 2016-04-03 | 10 |
| 0.1  | 1.2  | 17 | 2016-05-09 | 4839.00 | 1.03 | 1.90 | 2016-05-11 | 25 |
| 0.05 | 0.8  | 16 | 2016-07-15 | 2512.00 | 0.82 | 0.83 | 2016-07-17 | 9  |
| 0.1  | 1.1  | 15 | 2016-04-02 | 3939.00 | 0.69 | 2.02 | 2016-04-04 | 10 |
| 0.1  | 1.2  | 17 | 2016-04-20 | 1232    | 0.76 | 2.9  | 2016-04-22 | 7  |
| 0.1  | 1.2  | 17 | 2016-03-30 | 885.00  | 0.22 | 0.92 | 2016-04-01 | 7  |
| 0.1  | 1.1  | 15 | 2016-04-17 | 4839.00 | 1.52 | 1.07 | 2016-04-19 | 16 |
| 0.1  | 1.1  | 15 | 2016-06-06 | 2534.00 | 0.68 | 1.00 | 2016-06-08 | 13 |
| 0.05 | 0.95 | 19 | 2016-04-05 | 909.00  | 1.44 | 0.44 | 2016-04-07 | 7  |
| 0.05 | 1.1  | 22 | 2016-05-01 | 956.00  | 1.10 | 0.35 | 2016-05-03 | 3  |
| 0.05 | 1.1  | 22 | 2016-04-06 | 1740.00 | 0.76 | 1.52 | 2016-04-08 | 10 |
| 0.05 | 0.8  | 16 | 2016-04-14 | 1157.00 | 6.06 | 1.26 | 2016-04-16 | 3  |
| 0.1  | 1.6  | 21 | 2016-04-07 | 1940.00 | 1.22 | 0.95 | 2016-04-09 | 12 |
| 0.05 | 0.8  | 16 | 2016-04-27 | 1528.00 | 3.58 | 0.92 | 2016-04-29 | 6  |
| 0.1  | 1.2  | 17 | 2016-04-18 | 4839.00 | 2.64 | 2.19 | 2016-04-20 | 24 |
| 0.1  | 1.05 | 14 | 2016-05-06 | 4839.00 | 2.20 | 1.42 | 2016-05-08 | 15 |
| 0.05 | 1.1  | 22 | 2016-04-14 | 2281.00 | 4.94 | 0.55 | 2016-04-16 | 7  |
| 0.05 | 0.8  | 16 | 2016-05-04 | 623.00  | 1.89 | 0.94 | 2016-05-06 | 3  |
| 0.1  | 1.2  | 17 | 2016-05-07 | 774.00  | 0.48 | 1.73 | 2016-05-09 | 8  |
| 0.1  | 1.2  | 17 | 2016-05-07 | 2015.00 | 0.55 | 2.44 | 2016-05-09 | 18 |
| 0.05 | 0.75 | 15 | 2016-04-29 | 4839.00 | 1.06 | 0.78 | 2016-05-01 | 11 |
| 0.05 | 0.7  | 14 | 2016-04-28 | 2369.00 | 0.63 | 2.28 | 2016-04-30 | 17 |
| 0.05 | 0.8  | 16 | 2016-04-30 | 1351.00 | 0.34 | 1.34 | 2016-05-02 | 7  |
| 0.1  | 1.2  | 17 | 2016-05-16 | 2404.00 | 0.53 | 1.75 | 2016-05-18 | 14 |
| 0.1  | 1.1  | 15 | 2016-06-08 | 2967.00 | 2.25 | 0.58 | 2016-06-10 | 8  |
| 0.05 | 0.9  | 18 | 2016-05-13 | 2784.00 | 0.39 | 1.14 | 2016-05-15 | 13 |
| 0.1  | 1.1  | 15 | 2016-06-01 | 4839.00 | 1.49 | 1.36 | 2016-06-03 | 22 |
| 0.1  | 1.05 | 14 | 2016-07-03 | 1159.00 | 0.69 | 0.29 | 2016-07-05 | 6  |
| 0.1  | 1.1  | 15 | 2016-05-25 | 4839.00 | 0.33 | 2.35 | 2016-05-27 | 23 |
| 0.1  | 1.2  | 17 | 2016-05-30 | 2932.00 | 0.68 | 3.00 | 2016-06-01 | 22 |
| 0.1  | 1.1  | 15 | 2016-06-25 | 1074.00 | 1.88 | 0.16 | 2016-06-27 | 14 |
| 0.1  | 1.15 | 16 | 2016-05-22 | 2655.00 | 0.14 | 1.54 | 2016-05-24 | 12 |
| 0.1  | 1.1  | 15 | 2016-07-04 | 3362.00 | 1.08 | 1.05 | 2016-07-06 | 18 |
| 0.1  | 1.05 | 14 | 2016-06-22 | 3055.00 | 0.84 | 1.10 | 2016-06-24 | 8  |
| 0.05 | 0.8  | 16 | 2016-06-07 | 2287.00 | 3.21 | 1.15 | 2016-06-09 | 7  |
| 0.05 | 0.8  | 16 | 2017-03-20 | 1460.00 | 2.77 | 2.24 | 2017-03-22 | 2  |
| 0.1  | 1.5  | 23 | 2016-06-08 | 1906.00 | 1.10 | 1.48 | 2016-06-10 | 10 |
| 0.1  | 1.15 | 16 | 2016-06-17 | 4839.00 | 0.15 | 3.18 | 2016-06-19 | 29 |
| 0.05 | 0.9  | 18 | 2016-06-03 | 1203.00 | 0.37 | 1.45 | 2016-06-05 | 4  |
| 0.1  | 1.05 | 14 | 2016-05-29 | 3591.00 | 0.79 | 1.32 | 2016-05-31 | 38 |
| 0.05 | 0.95 | 19 | 2016-06-01 | 4839.00 | 2.16 | 1.27 | 2016-06-03 | 18 |
| 0.05 | 1.3  | 26 | 2016-06-18 | 2846.00 | 1.70 | 1.23 | 2016-06-20 | 2  |
| 0.1  | 1.1  | 15 | 2016-06-05 | 1454.00 | 1.33 | 2.26 | 2016-06-07 | 10 |
| 0.1  | 1.1  | 15 | 2016-06-11 | 4839.00 | 0.95 | 2.08 | 2016-06-13 | 28 |
| 0.1  | 1.1  | 15 | 2016-06-06 | 2898.00 | 1.86 | 2.30 | 2016-06-08 | 8  |
| 0.1  | 1.1  | 15 | 2016-06-29 | 2026.00 | 1.06 | 0.25 | 2016-07-01 | 9  |
| 0.1  | 1.1  | 15 | 2016-06-29 | 4839.00 | 0.92 | 1.73 | 2016-07-01 | 20 |
| 0.1  | 1.2  | 17 | 2016-07-27 | 2109.00 | 0.89 | 1.01 | 2016-07-29 | 14 |
| 0.1  | 1.1  | 15 | 2016-07-03 | 2656.00 | 1.46 | 0.50 | 2016-07-05 | 6  |
| 0.1  | 1.05 | 14 | 2016-07-23 | 2310.00 | 0.76 | 0.50 | 2016-07-25 | 13 |

|      |      |    |            |         |      |      |            |    |
|------|------|----|------------|---------|------|------|------------|----|
| 0.1  | 1.15 | 16 | 2016-07-11 | 2688.00 | 1.10 | 0.58 | 2016-07-13 | 8  |
| 0.1  | 1.1  | 15 | 2016-07-13 | 4839.00 | 0.77 | 2.57 | 2016-07-15 | 26 |
| 0.1  | 1.1  | 15 | 2016-06-21 | 4233.00 | 1.98 | 1.43 | 2016-06-23 | 10 |
| 0.05 | 0.8  | 16 | 2016-09-02 | 5060.00 | 1.30 | 0.54 | 2016-09-04 | 11 |
| 0.1  | 1.1  | 15 | 2016-06-28 | 2537.00 | 2.08 | 0.85 | 2016-06-30 | 4  |
| 0.05 | 0.8  | 16 | 2016-08-03 | 920.00  | 2.71 | 1.02 | 2016-08-05 | 2  |
| 0.05 | 0.7  | 14 | 2016-07-10 | 3341.00 | 0.56 | 0.85 | 2016-07-12 | 10 |
| 0.1  | 1.05 | 14 | 2016-06-29 | 4839.00 | 1.05 | 1.69 | 2016-07-01 | 15 |
| 0.1  | 1.2  | 17 | 2016-08-03 | 2713.00 | 0.42 | 1.61 | 2016-08-05 | 11 |
| 0.1  | 1.05 | 14 | 2016-07-05 | 2316.00 | 1.35 | 2.24 | 2016-07-07 | 11 |
| 0.2  | 1.15 | 14 | 2016-07-06 | 1067.00 | 0.47 | 0.58 | 2016-07-08 | 7  |
| 0.1  | 1.05 | 14 | 2016-07-25 | 4839.00 | 2.55 | 1.70 | 2016-07-27 | 22 |
| 0.1  | 1.05 | 14 | 2016-07-24 | 1620.00 | 0.26 | 0.84 | 2016-07-26 | 12 |
| 0.1  | 1.1  | 15 | 2016-07-09 | 1416.00 | 1.17 | 0.97 | 2016-07-11 | 7  |
| 0.1  | 1.05 | 14 | 2016-07-11 | 2772.00 | 1.08 | 1.51 | 2016-07-13 | 10 |
| 0.1  | 1.2  | 17 | 2016-08-16 | 2306.00 | 0.20 | 1.12 | 2016-08-18 | 7  |
| 0.1  | 1.15 | 16 | 2016-08-01 | 4641.00 | 0.78 | 1.76 | 2016-08-03 | 14 |
| 0.1  | 1.2  | 17 | 2016-07-30 | 804.00  | 0.38 | 0.61 | 2016-08-01 | 6  |
| 0.05 | 0.7  | 14 | 2016-09-05 | 1241.00 | 1.48 | 0.59 | 2016-09-07 | 5  |
| 0.1  | 1.2  | 17 | 2016-08-01 | 4403.00 | 2.53 | 0.49 | 2016-08-03 | 15 |
| 0.1  | 1.2  | 17 | 2016-08-06 | 1063.00 | 0.40 | 0.79 | 2016-08-08 | 7  |
| 0.1  | 1.2  | 17 | 2016-08-03 | 5060.00 | 0.40 | 1.99 | 2016-08-05 | 21 |
| 0.05 | 1.25 | 25 | 2016-07-29 | 5060.00 | 2.11 | 1.48 | 2016-07-31 | 18 |
| 0.1  | 1.05 | 14 | 2016-08-23 | 5060.00 | 0.12 | 1.73 | 2016-08-25 | 19 |
| 0.05 | 1    | 20 | 2016-08-20 | 962.00  | 0.15 | 1.31 | 2016-08-22 | 6  |
| 0.1  | 1.1  | 15 | 2016-08-13 | 5060.00 | 1.08 | 0.99 | 2016-08-15 | 30 |
| 0.1  | 1.15 | 16 | 2016-08-03 | 3742.00 | 0.67 | 1.14 | 2016-08-05 | 10 |
| 0.1  | 1.1  | 15 | 2016-08-22 | 4484.00 | 1.80 | 1.17 | 2016-08-24 | 9  |
| 0.1  | 1.2  | 17 | 2016-07-29 | 4354.00 | 0.46 | 2.41 | 2016-07-31 | 25 |
| 0.05 | 0.86 | 18 | 2016-08-06 | 1565.00 | 0.72 | 1.58 | 2016-08-08 | 9  |
| 0.1  | 1.15 | 16 | 2016-08-20 | 3432.00 | 1.09 | 1.79 | 2016-08-22 | 18 |
| 0.1  | 1.1  | 15 | 2016-09-20 | 3290.00 | 0.43 | 0.88 | 2016-09-22 | 11 |
| 0.1  | 1.1  | 15 | 2016-08-05 | 1898.00 | 0.66 | 0.54 | 2016-08-07 | 8  |
| 0.05 | 0.9  | 18 | 2016-08-21 | 2142.00 | 1.12 | 1.39 | 2016-08-23 | 9  |
| 0.1  | 1.2  | 17 | 2016-08-28 | 5060.00 | 0.76 | 1.39 | 2016-08-30 | 23 |
| 0.1  | 1.1  | 15 | 2016-09-25 | 3347.00 | 1.53 | 1.86 | 2016-09-27 | 14 |
| 0.1  | 1.1  | 15 | 2016-09-09 | 2453.00 | 1.06 | 0.88 | 2016-09-11 | 5  |
| 0.1  | 1.1  | 15 | 2016-09-26 | 3365.00 | 0.81 | 0.87 | 2016-09-28 | 14 |
| 0.1  | 1.2  | 17 | 2016-09-27 | 3425.00 | 0.40 | 1.07 | 2016-09-29 | 25 |
| 0.1  | 1.25 | 18 | 2016-12-22 | 3326.00 | 0.66 | 1.22 | 2016-12-24 | 12 |
| 0.1  | 1.2  | 17 | 2016-11-18 | 1925.00 | 0.68 | 1.32 | 2016-11-20 | 10 |
| 0.1  | 1.2  | 17 | 2016-09-03 | 1805.00 | 0.82 | 0.58 | 2016-09-05 | 13 |
| 0.05 | 1.2  | 24 | 2016-08-28 | 4436.00 | 0.57 | 0.52 | 2016-08-30 | 18 |
| 0.1  | 1.1  | 15 | 2016-09-25 | 3080.00 | 0.52 | 2.97 | 2016-09-27 | 17 |
| 0.1  | 1.2  | 17 | 2016-10-08 | 1932.00 | 0.72 | 1.14 | 2016-10-10 | 12 |
| 0.1  | 1.8  | 24 | 2016-09-05 | 3554.00 | 2.58 | 0.88 | 2016-09-07 | 10 |
| 0.05 | 1.1  | 22 | 2016-09-02 | 1857.00 | 0.25 | 0.57 | 2016-09-04 | 5  |
| 0.1  | 1.2  | 17 | 2016-10-03 | 5060.00 | 0.65 | 2.86 | 2016-10-05 | 26 |
| 0.05 | 0.8  | 16 | 2016-09-14 | 2265.00 | 4.41 | 0.65 | 2016-09-16 | 7  |
| 0.1  | 1.05 | 14 | 2016-10-03 | 5060.00 | 2.72 | 1.48 | 2016-10-05 | 15 |

|      |      |    |            |         |      |      |            |    |
|------|------|----|------------|---------|------|------|------------|----|
| 0.05 | 0.9  | 18 | 2016-09-29 | 3949.00 | 0.41 | 4.74 | 2016-10-01 | 9  |
| 0.1  | 1.1  | 15 | 2016-09-12 | 1492.00 | 1.87 | 1.49 | 2016-09-14 | 10 |
| 0.1  | 1.1  | 15 | 2016-09-11 | 5060.00 | 0.79 | 0.51 | 2016-09-13 | 21 |
| 0.05 | 1.25 | 25 | 2016-09-21 | 5060.00 | 1.12 | 2.57 | 2016-09-23 | 33 |
| 0.1  | 1.2  | 17 | 2016-10-02 | 2059.00 | 0.62 | 3.16 | 2016-10-04 | 14 |
| 0.1  | 1.2  | 17 | 2016-10-09 | 3753.00 | 0.43 | 2.23 | 2016-10-11 | 20 |
| 0.1  | 1.7  | 24 | 2016-09-22 | 5060.00 | 1.76 | 2.18 | 2016-09-24 | 23 |
| 0.1  | 1.2  | 17 | 2016-09-23 | 5060.00 | 1.70 | 1.05 | 2016-09-25 | 28 |
| 0.1  | 1.75 | 23 | 2016-10-09 | 2608.00 | 0.88 | 0.76 | 2016-10-11 | 9  |
| 0.1  | 1.45 | 22 | 2016-11-07 | 4345.00 | 0.58 | 0.63 | 2016-11-09 | 10 |
| 0.1  | 1.1  | 15 | 2016-11-16 | 3748.00 | 0.56 | 1.19 | 2016-11-18 | 21 |
| 0.05 | 1.05 | 21 | 2016-10-04 | 1895.00 | 2.11 | 0.59 | 2016-10-06 | 11 |
| 0.1  | 1.3  | 15 | 2016-12-18 | 4800.00 | 5.89 | 1.65 | 2016-12-20 | 23 |
| 0.1  | 1.2  | 17 | 2016-10-25 | 4316.00 | 2.25 | 1.67 | 2016-10-27 | 10 |
| 0.1  | 1.05 | 14 | 2016-11-21 | 5060.00 | 1.51 | 1.50 | 2016-11-23 | 8  |
| 0.1  | 1.2  | 17 | 2016-10-30 | 1260.00 | 0.33 | 0.60 | 2016-11-01 | 20 |
| 0.1  | 1.2  | 17 | 2016-10-30 | 903.00  | 0.20 | 0.69 | 2016-11-01 | 8  |
| 0.1  | 1.2  | 17 | 2016-12-02 | 3066.00 | 2.18 | 1.80 | 2016-12-04 | 8  |
| 0.1  | 1.2  | 17 | 2016-11-24 | 4637.00 | 1.67 | 1.36 | 2016-11-26 | 7  |
| 0.1  | 1.2  | 17 | 2016-11-11 | 1486.00 | 1.68 | 1.37 | 2016-11-13 | 10 |
| 0.1  | 1.1  | 15 | 2016-12-12 | 4800.00 | 2.66 | 2.34 | 2016-12-14 | 11 |
| 0.1  | 1.2  | 17 | 2016-11-08 | 4071.00 | 0.86 | 1.62 | 2016-11-10 | 26 |
| 0.1  | 1.05 | 14 | 2016-11-30 | 3696.00 | 0.41 | 1.05 | 2016-12-02 | 13 |
| 0.1  | 1.2  | 17 | 2016-11-06 | 5060.00 | 1.53 | 1.13 | 2016-11-08 | 13 |
| 0.05 | 0.8  | 16 | 2016-11-08 | 5060.00 | 0.22 | 1.01 | 2016-11-10 | 8  |
| 0.1  | 1.05 | 14 | 2016-11-22 | 1183.00 | 1.90 | 1.31 | 2016-11-24 | 11 |
| 0.1  | 1.85 | 22 | 2016-11-05 | 1367.00 | 1.75 | 2.47 | 2016-11-07 | 3  |
| 0.1  | 1.2  | 17 | 2016-11-26 | 2858.00 | 0.43 | 1.56 | 2016-11-28 | 25 |
| 0.05 | 0.9  | 18 | 2016-11-10 | 2482.00 | 0.41 | 1.31 | 2016-11-12 | 15 |
| 0.1  | 1.25 | 19 | 2016-11-07 | 5060.00 | 3.14 | 1.67 | 2016-11-09 | 15 |
| 0.1  | 1.1  | 15 | 2016-11-24 | 2045.00 | 0.79 | 1.70 | 2016-11-26 | 16 |
| 0.1  | 1.2  | 17 | 2017-01-06 | 2360.00 | 0.96 | 1.64 | 2017-01-08 | 3  |
| 0.1  | 1.05 | 14 | 2016-12-05 | 4800.00 | 2.17 | 1.55 | 2016-12-07 | 16 |
| 0.1  | 1.2  | 17 | 2016-12-03 | 2728.00 | 1.04 | 1.98 | 2016-12-05 | 20 |
| 0.1  | 1.2  | 17 | 2016-11-27 | 1003.00 | 1.03 | 1.00 | 2016-11-29 | 5  |
| 0.1  | 1.3  | 19 | 2016-11-20 | 2074.00 | 1.29 | 0.84 | 2016-11-22 | 10 |
| 0.1  | 1.05 | 14 | 2016-12-14 | 4800.00 | 0.77 | 1.86 | 2016-12-16 | 17 |
| 0.1  | 1.2  | 17 | 2017-03-14 | 4572.00 | 0.66 | 1.88 | 2017-03-16 | 12 |
| 0.1  | 1.1  | 15 | 2016-12-23 | 3236.00 | 0.65 | 1.70 | 2016-12-25 | 10 |
| 0.05 | 0.9  | 18 | 2016-11-15 | 2722.00 | 0.69 | 1.64 | 2016-11-17 | 10 |
| 0.1  | 1.05 | 14 | 2016-12-06 | 4800.00 | 0.68 | 1.82 | 2016-12-08 | 20 |
| 0.1  | 1.1  | 15 | 2016-11-24 | 4021.00 | 0.61 | 2.99 | 2016-11-26 | 30 |
| 0.1  | 1.2  | 17 | 2016-11-29 | 5060.00 | 1.08 | 1.84 | 2016-12-01 | 17 |
| 0.05 | 1.2  | 24 | 2016-12-29 | 1610.00 | 0.60 | 0.55 | 2016-12-31 | 6  |
| 0.1  | 1.1  | 15 | 2016-11-23 | 5060.00 | 3.22 | 1.44 | 2016-11-25 | 31 |
| 0.1  | 1.45 | 20 | 2016-11-08 | 5060.00 | 1.38 | 1.75 | 2016-11-10 | 7  |
| 0.1  | 1.1  | 15 | 2016-12-21 | 5060.00 | 0.78 | 2.86 | 2016-12-23 | 15 |
| 0.1  | 1.1  | 15 | 2016-11-24 | 3772.00 | 0.50 | 1.54 | 2016-11-26 | 24 |
| 0.1  | 1.1  | 15 | 2016-12-21 | 2628.00 | 3.45 | 4.84 | 2016-12-23 | 7  |
| 0.1  | 1.1  | 15 | 2016-12-11 | 3109.00 | 1.21 | 1.60 | 2016-12-13 | 11 |

|      |      |    |            |         |      |      |            |    |
|------|------|----|------------|---------|------|------|------------|----|
| 0.05 | 0.7  | 14 | 2016-12-11 | 1733.00 | 0.60 | 1.47 | 2016-12-13 | 6  |
| 0.1  | 1.2  | 17 | 2016-12-13 | 4313.00 | 1.62 | 0.70 | 2016-12-15 | 16 |
| 0    | 1.1  | 22 | 2017-01-16 | 3325.00 | 0.15 | 0.99 | 2017-01-18 | 11 |
| 0.1  | 1.1  | 15 | 2016-12-13 | 5060.00 | 2.55 | 1.04 | 2016-12-15 | 35 |
| 0.1  | 1.1  | 15 | 2017-01-11 | 2043.00 | 1.28 | 0.75 | 2017-01-13 | 6  |
| 0.1  | 1.1  | 15 | 2016-12-21 | 5060.00 | 0.85 | 1.64 | 2016-12-23 | 27 |
| 0.1  | 1.2  | 17 | 2016-12-18 | 4800.00 | 0.65 | 2.13 | 2016-12-20 | 13 |
| 0.05 | 1.15 | 23 | 2016-12-15 | 5060.00 | 0.24 | 1.11 | 2016-12-17 | 18 |
| 0.05 | 0.8  | 16 | 2016-12-28 | 2847.00 | 1.47 | 1.07 | 2016-12-30 | 10 |
| 0.1  | 1.1  | 15 | 2016-12-09 | 4800.00 | 1.11 | 1.18 | 2016-12-11 | 32 |
| 0.1  | 1.1  | 15 | 2016-12-28 | 2330.00 | 1.24 | 0.67 | 2016-12-30 | 13 |
| 0.05 | 0.8  | 16 | 2016-12-19 | 2013.00 | 1.96 | 1.04 | 2016-12-21 | 4  |
| 0.1  | 1.1  | 15 | 2017-01-14 | 4623.00 | 0.94 | 1.19 | 2017-01-16 | 12 |
| 0.05 | 0.7  | 14 | 2017-01-01 | 1006.00 | 1.72 | 0.51 | 2017-01-03 | 5  |
| 0.1  | 1.1  | 15 | 2017-01-02 | 1909.00 | 1.46 | 0.55 | 2017-01-04 | 2  |
| 0.1  | 1.2  | 17 | 2017-01-02 | 1357.00 | 0.60 | 1.13 | 2017-01-04 | 6  |
| 0.1  | 1.1  | 15 | 2016-12-28 | 1664.00 | 2.03 | 1.14 | 2016-12-30 | 13 |
| 0.05 | 0.9  | 18 | 2017-01-07 | 4800.00 | 0.48 | 1.20 | 2017-01-09 | 30 |
| 0.1  | 1.1  | 15 | 2016-12-30 | 2549.00 | 3.30 | 2.10 | 2017-01-01 | 14 |
| 0.05 | 0.8  | 16 | 2017-04-04 | 2594.00 | 1.93 | 0.21 | 2017-04-06 | 16 |
| 0.05 | 1.2  | 24 | 2017-01-21 | 4800.00 | 0.66 | 1.42 | 2017-01-23 | 23 |
| 0.1  | 1.35 | 20 | 2017-01-01 | 4800.00 | 2.08 | 1.27 | 2017-01-03 | 23 |
| 0.05 | 0.8  | 16 | 2017-01-11 | 4800.00 | 1.95 | 0.87 | 2017-01-13 | 28 |
| 0.7  | 1.4  | 15 | 2016-12-30 | 4800.00 | 0.33 | 2.21 | 2017-01-01 | 21 |
| 0.05 | 0.85 | 17 | 2017-01-11 | 1276.00 | 0.55 | 1.61 | 2017-01-13 | 5  |
| 0.05 | 1.1  | 22 | 2017-01-14 | 3861.00 | 3.75 | 1.68 | 2017-01-16 | 9  |
| 0.1  | 1.5  | 23 | 2017-01-08 | 4800.00 | 1.16 | 1.12 | 2017-01-10 | 22 |
| 0.05 | 1.1  | 22 | 2017-02-24 | 4800.00 | 0.22 | 2.41 | 2017-02-26 | 25 |
| 0.1  | 1.1  | 15 | 2017-01-12 | 884.00  | 1.37 | 0.84 | 2017-01-14 | 6  |
| 0.05 | 0.8  | 16 | 2017-03-06 | 3234.00 | 0.86 | 0.79 | 2017-03-08 | 17 |
| 0.05 | 0.9  | 18 | 2017-01-09 | 3421.00 | 0.35 | 0.79 | 2017-01-11 | 13 |
| 0.05 | 0.7  | 14 | 2017-04-02 | 1313.00 | 1.92 | 1.49 | 2017-04-04 | 4  |
| 0.1  | 1.2  | 17 | 2017-02-25 | 427.00  | 0.47 | 0.51 | 2017-02-27 | 3  |
| 0.05 | 0.9  | 18 | 2017-03-02 | 3536.00 | 0.48 | 1.23 | 2017-03-04 | 14 |
| 0.05 | 0.8  | 16 | 2017-02-16 | 1470.00 | 0.64 | 1.53 | 2017-02-18 | 7  |
| 0.05 | 0.8  | 16 | 2017-03-01 | 1855.00 | 5.84 | 1.29 | 2017-03-03 | 4  |
| 0.05 | 0.7  | 14 | 2017-03-26 | 1504.00 | 1.16 | 1.32 | 2017-03-28 | 8  |
| 0.05 | 0.8  | 16 | 2017-03-03 | 2417    | 0.72 | 2.1  | 2017-03-05 | 7  |
| 0.05 | 1    | 20 | 2017-04-13 | 1168.00 | 1.49 | 0.27 | 2017-04-15 | 4  |
| 0.05 | 0.9  | 18 | 2017-01-16 | 1593.00 | 1.28 | 0.38 | 2017-01-18 | 3  |
| 0.05 | 0.9  | 18 | 2017-03-03 | 4800.00 | 0.62 | 2.73 | 2017-03-05 | 31 |
| 0.05 | 1.05 | 21 | 2017-03-17 | 2567.00 | 0.18 | 0.40 | 2017-03-19 | 12 |
| 0.1  | 1.4  | 21 | 2017-02-16 | 1641.00 | 3.37 | 0.87 | 2017-02-18 | 7  |
| 0.05 | 1.1  | 22 | 2017-02-22 | 4800.00 | 5.64 | 2.03 |            | 13 |
| 0.05 | 0.85 | 17 | 2017-03-16 | 631.00  | 0.62 | 0.64 | 2017-03-18 | 8  |
| 0.05 | 0.7  | 14 | 2017-03-15 | 1877.00 | 3.06 | 1.63 | 2017-03-17 | 7  |
| 0.05 | 0.8  | 16 | 2017-03-18 | 1168.00 | 0.85 | 0.63 | 2017-03-20 | 7  |
| 0.05 | 0.7  | 14 | 2017-02-16 | 4800.00 | 3.05 | 1.81 | 2017-02-18 | 18 |
| 0.05 | 0.8  | 16 | 2017-03-02 | 4528.00 | 1.38 | 3.55 | 2017-03-04 | 14 |
| 0.05 | 0.9  | 18 | 2017-03-02 | 3058.00 | 1.41 | 1.17 | 2017-03-04 | 16 |



|      |      |    |            |         |      |      |            |    |
|------|------|----|------------|---------|------|------|------------|----|
| 0.1  | 1.05 | 14 | 2017-02-27 | 1492.00 | 1.02 | 0.82 | 2017-03-01 | 2  |
| 0.05 | 0.85 | 17 | 2017-03-06 | 1276.00 | 1.50 | 0.69 | 2017-03-08 | 6  |
| 0.05 | 1.15 | 23 | 2017-02-26 | 754.00  | 0.26 | 1.03 | 2017-02-28 | 5  |
| 0.05 | 0.9  | 18 | 2017-03-30 | 3307.00 | 0.52 | 1.78 | 2017-04-01 | 17 |
| 0.05 | 0.7  | 14 | 2017-03-21 | 4800.00 | 3.29 | 1.87 | 2017-03-23 | 12 |
| 0.05 | 0.7  | 14 | 2017-02-20 | 4800.00 | 2.07 | 1.18 | 2017-02-22 | 22 |
| 0.05 | 0.9  | 18 | 2017-03-04 | 1939.00 | 1.01 | 1.39 | 2017-03-06 | 17 |
| 0.1  | 1.45 | 22 | 2017-03-03 | 2759.00 | 1.46 | 1.64 | 2017-03-05 | 5  |
| 0.05 | 0.8  | 16 | 2017-03-05 | 2913.00 | 0.29 | 0.97 | 2017-03-07 | 15 |
| 0.05 | 0.95 | 19 | 2017-03-06 | 3107.00 | 1.39 | 4.43 | 2017-03-08 | 8  |
| 0.05 | 0.7  | 14 | 2017-03-07 | 959.00  | 2.28 | 0.48 | 2017-03-09 | 4  |
| 0.05 | 0.7  | 14 | 2017-03-05 | 1577.00 | 0.36 | 0.72 | 2017-03-07 | 12 |
| 0.1  | 1.2  | 17 | 2017-03-13 | 1833.00 | 1.61 | 2.44 | 2017-03-15 | 11 |
| 0.05 | 0.8  | 16 | 2017-03-11 | 2078.00 | 1.42 | 0.64 | 2017-03-13 | 12 |
| 0.05 | 0.7  | 14 | 2017-03-29 | 4800.00 | 3.31 | 1.33 | 2017-03-31 | 15 |
| 0.1  | 1.1  | 15 | 2017-03-13 | 4800.00 | 1.61 | 1.89 | 2017-03-15 | 21 |
| 0.05 | 0.7  | 14 | 2017-03-27 | 2277.00 | 1.76 | 0.61 | 2017-03-29 | 8  |
| 0.05 | 1.05 | 21 | 2017-03-13 | 4800.00 | 2.42 | 1.11 | 2017-03-15 | 22 |
| 0.05 | 0.9  | 18 | 2017-03-24 | 2224.00 | 0.50 | 1.25 | 2017-03-26 | 10 |
| 0.05 | 0.9  | 18 | 2017-04-05 | 4800.00 | 1.82 | 1.44 | 2017-04-07 | 16 |
| 0.05 | 0.9  | 18 | 2017-03-31 | 3254.00 | 0.66 | 0.73 | 2017-04-02 | 16 |
| 0.05 | 1.15 | 23 | 2017-04-05 | 3325.00 | 1.40 | 1.15 | 2017-04-07 | 12 |
| 0.05 | 0.7  | 14 | 2017-04-03 | 4800.00 | 0.64 | 0.82 | 2017-04-05 | 15 |
| 0.1  | 1.15 | 16 | 2017-04-18 | 4160.00 | 1.54 | 2.25 | 2017-04-20 | 25 |
| 0.05 | 0.95 | 19 | 2017-04-06 | 2956.00 | 0.98 | 1.09 | 2017-04-08 | 19 |
| 0.05 | 0.8  | 16 | 2017-04-03 | 2469.00 | 0.56 | 2.00 | 2017-04-05 | 12 |
| 0.05 | 0.7  | 14 | 2017-03-23 | 1386.00 | 0.63 | 1.10 | 2017-03-25 | 4  |
| 0.05 | 0.8  | 16 | 2017-03-17 | 4800.00 | 0.41 | 1.13 | 2017-03-19 | 18 |
| 0.05 | 0.7  | 14 | 2017-03-20 | 4800.00 | 5.02 | 1.59 | 2017-03-22 | 7  |
| 0.05 | 0.7  | 14 | 2017-03-19 | 1914.00 | 1.91 | 0.76 | 2017-03-21 | 9  |
| 0.05 | 0.9  | 18 | 2017-03-26 | 3031.00 | 1.48 | 2.53 | 2017-03-28 | 13 |
| 0.05 | 0.7  | 14 | 2017-03-31 | 2009.00 | 0.96 | 0.87 | 2017-04-02 | 9  |
| 0.05 | 0.7  | 14 | 2017-06-12 | 4936    | 2.81 | 1.85 | 2017-06-14 | 24 |
| 0.05 | 0.7  | 14 | 2017-04-08 | 1569.00 | 9.50 | 0.44 | 2017-04-10 | 5  |
| 0.05 | 0.7  | 14 | 2017-03-26 | 567.00  | 7.62 | 0.56 | 2017-03-28 | 2  |
| 0.05 | 0.7  | 14 | 2017-04-24 | 4800.00 | 0.58 | 0.50 | 2017-04-26 | 18 |
| 0.05 | 0.7  | 14 | 2017-04-03 | 4800.00 | 1.11 | 2.00 | 2017-04-05 | 15 |
| 0.05 | 0.7  | 14 | 2017-06-06 | 4936    | 1.42 | 1.33 | 2017-06-08 | 38 |
| 0.05 | 1.1  | 22 | 2017-03-30 | 4059.00 | 0.72 | 1.83 | 2017-04-01 | 20 |
| 0.05 | 0.8  | 16 | 2017-04-23 | 4800.00 | 0.62 | 0.89 | 2017-04-25 | 30 |
| 0.05 | 0.7  | 14 | 2017-04-16 | 4800.00 | 2.49 | 1.26 | 2017-04-18 | 17 |
| 0.05 | 0.7  | 14 | 2017-04-03 | 3479.00 | 2.59 | 0.89 | 2017-04-05 | 5  |
| 0.05 | 0.7  | 14 | 2017-08-15 | 1028.00 | 1.9  | 0.31 | 2017-08-17 | 5  |
| 0.05 | 0.7  | 14 | 2017-05-05 | 4800.00 | 0.67 | 1.54 | 2017-05-07 | 19 |
| 0.05 | 0.85 | 17 | 2017-06-02 | 4365.00 | 0.51 | 0.89 | 2017-06-04 | 16 |
| 0.05 | 0.7  | 14 | 2017-04-15 | 1480.00 | 4.12 | 0.34 | 2017-04-17 | 3  |
| 0.05 | 0.7  | 14 | 2017-04-07 | 1550.00 | 1.37 | 0.80 | 2017-04-09 | 6  |
| 0.05 | 0.7  | 14 | 2017-04-03 | 3990.00 | 1.21 | 0.75 | 2017-04-05 | 5  |
| 0.05 | 0.8  | 16 | 2017-04-15 | 3159.00 | 1.62 | 0.45 | 2017-04-17 | 20 |
| 0.05 | 1.05 | 18 | 2017-03-23 | 1798.00 | 0.65 | 1.23 | 2017-03-25 | 9  |

|      |      |    |            |         |      |      |            |    |
|------|------|----|------------|---------|------|------|------------|----|
| 0.05 | 0.85 | 17 | 2017-03-23 | 3785.00 | 0.25 | 0.55 | 2017-03-25 | 11 |
| 0.05 | 0.7  | 14 | 2017-04-06 | 4055.00 | 0.43 | 0.87 | 2017-04-08 | 16 |
| 0.05 | 0.8  | 16 | 2017-04-16 | 2417.00 | 1.40 | 0.80 | 2017-04-18 | 13 |
| 0.05 | 1.2  | 24 | 2017-04-22 | 2625.00 | 0.53 | 0.23 | 2017-04-24 | 8  |
| 0.05 | 0.9  | 18 | 2017-04-10 | 1857.00 | 0.86 | 0.84 | 2017-04-12 | 10 |
| 0.05 | 0.7  | 14 | 2017-04-25 | 4800.00 | 1.20 | 1.52 | 2017-04-27 | 16 |
| 0.05 | 0.7  | 14 | 2017-05-15 | 4316.00 | 1.5  | 0.99 | 2017-05-17 | 9  |
| 0.1  | 1.3  | 19 | 2017-05-15 | 2120.00 | 2.19 | 0.57 | 2017-05-17 | 4  |
| 0.05 | 0.7  | 14 | 2017-04-27 | 4800.00 | 1.42 | 0.53 | 2017-04-29 | 12 |
| 0.05 | 0.7  | 14 | 2017-04-16 | 1692.00 | 4.20 | 0.54 | 2017-04-18 | 5  |
| 0.05 | 0.7  | 14 | 2017-05-26 | 1835.00 | 0.4  | 1.5  | 2017-05-28 | 8  |
| 0.05 | 0.8  | 16 | 2017-04-23 | 4800.00 | 0.58 | 1.63 | 2017-04-25 | 21 |
| 0.05 | 0.8  | 16 | 2017-05-02 | 3690.00 | 1.07 | 0.97 | 2017-05-04 | 9  |
| 0.05 | 0.7  | 14 | 2017-05-18 | 4800.00 | 1.6  | 3.61 | 2017-05-20 | 11 |
| 0.05 | 0.7  | 14 | 2017-05-06 | 3403.00 | 3.86 | 0.42 | 2017-05-08 | 18 |
| 0.05 | 0.7  | 14 | 2017-05-10 | 4800.00 | 0.73 | 2.72 | 2017-05-12 | 44 |
| 0.05 | 0.8  | 16 | 2017-04-15 | 4800.00 | 1.09 | 0.77 | 2017-04-17 | 19 |
| 0.05 | 0.7  | 14 | 2017-05-03 | 4786.00 | 2.11 | 1.43 | 2017-05-05 | 16 |
| 0.05 | 1    | 20 | 2017-04-22 | 1875.00 | 1.20 | 1.22 | 2017-04-24 | 7  |
| 0.05 | 0.75 | 15 | 2017-04-03 | 3197.00 | 0.77 | 1.22 | 2017-04-05 | 14 |
| 0.05 | 0.7  | 14 | 2017-04-21 | 4800.00 | 1.77 | 0.86 | 2017-04-23 | 24 |
| 0.05 | 0.7  | 14 | 2017-05-17 | 3895    | 0.78 | 0.53 | 2017-05-19 | 4  |
| 0.05 | 0.7  | 14 | 2017-05-08 | 4800    | 1.25 | 1.18 | 2017-05-10 | 15 |
| 0.05 | 1    | 20 | 2017-04-23 | 1625.00 | 0.23 | 0.88 | 2017-04-25 | 8  |
| 0.05 | 0.8  | 16 | 2017-04-29 | 4800    | 0.47 | 1.32 | 2017-05-01 | 27 |
| 0.05 | 0.9  | 18 | 2017-05-26 | 4800    | 0.94 | 2.61 | 2017-05-28 | 29 |
| 0.05 | 0.7  | 14 | 2017-05-03 | 4800    | 5.56 | 1.72 | 2017-05-05 | 6  |
| 0.05 | 0.8  | 16 | 2017-04-25 | 2363.00 | 1.74 | 1.27 | 2017-04-27 | 17 |
| 0.05 | 0.7  | 14 | 2017-05-18 | 1344.00 | 1.28 | 1.16 | 2017-05-20 | 8  |
| 0.1  | 1.2  | 17 | 2017-06-09 | 2122.00 | 2.19 | 0.54 | 2017-06-11 | 9  |
| 0.05 | 0.7  | 14 | 2017-07-13 | 4297.00 | 1.49 | 0.96 | 2017-07-15 | 14 |
| 0.05 | 0.9  | 18 | 2017-05-17 | 4800.00 | 6.03 | 1.46 | 2017-05-19 | 17 |
| 0.05 | 0.7  | 14 | 2017-05-15 | 4800.00 | 0.68 | 1.47 | 2017-05-17 | 21 |
| 0.05 | 0.7  | 14 | 2017-05-13 | 3030.00 | 3.01 | 1.20 | 2017-05-15 | 10 |
| 0.05 | 0.7  | 14 | 2017-05-16 | 2717.00 | 1.45 | 0.93 | 2017-05-18 | 10 |
| 0.05 | 1.15 | 20 | 2017-06-07 | 1749.00 | 2.50 | 1.31 | 2017-06-09 | 5  |
| 0.05 | 0.8  | 16 | 2017-05-05 | 4531.00 | 2.41 | 1.43 | 2017-05-07 | 10 |
| 0.05 | 0.7  | 14 | 2017-05-04 | 2576.00 | 2.30 | 1.68 | 2017-05-06 | 14 |
| 0.05 | 0.95 | 19 | 2017-05-29 | 2263.00 | 2.13 | 1.78 | 2017-05-31 | 7  |
| 0.05 | 0.8  | 16 | 2017-05-19 | 2333.00 | 0.87 | 1.48 | 2017-05-21 | 11 |
| 0.05 | 0.7  | 14 | 2017-06-04 | 4260.00 | 1.44 | 0.76 | 2017-06-06 | 13 |
| 0.05 | 0.8  | 16 | 2017-05-07 | 768.00  | 0.69 | 0.33 | 2017-05-09 | 14 |
| 0.05 | 0.7  | 14 | 2017-05-15 | 3580.00 | 1.04 | 2.20 | 2017-05-17 | 19 |
| 0.05 | 0.7  | 14 | 2017-05-20 | 1263.00 | 1.56 | 0.47 | 2017-05-22 | 7  |
| 0.05 | 0.8  | 16 | 2017-05-15 | 4800.00 | 0.34 | 0.88 | 2017-05-17 | 38 |
| 0.05 | 0.8  | 16 | 2017-05-10 | 4800.00 | 0.72 | 3.54 | 2017-05-12 | 10 |
| 0.05 | 0.9  | 18 | 2017-05-29 | 2842.00 | 0.75 | 2.11 |            | 13 |
| 0.05 | 0.7  | 14 | 2017-05-09 | 4800.00 | 2.70 | 0.89 | 2017-05-11 | 17 |
| 0.05 | 0.7  | 14 | 2017-05-07 | 1051.00 | 2.63 | 0.58 | 2017-05-09 | 7  |
| 0.05 | 0.7  | 14 | 2017-06-27 | 4839.00 | 0.30 | 1.54 | 2017-06-29 | 16 |

|      |      |    |            |         |      |      |            |    |
|------|------|----|------------|---------|------|------|------------|----|
| 0.05 | 0.7  | 14 | 2017-04-29 | 1641.00 | 2.97 | 0.61 | 2017-05-01 | 10 |
| 0.05 | 0.8  | 16 | 2017-04-27 | 1839.00 | 1.09 | 0.50 | 2017-04-29 | 9  |
| 0.05 | 0.7  | 14 | 2017-05-19 | 1233.00 | 2.92 | 1.12 | 2017-05-21 | 4  |
| 0.05 | 0.8  | 16 | 2017-06-09 | 4936.00 | 1.50 | 1.37 | 2017-06-11 | 18 |
| 0.05 | 0.7  | 14 | 2017-05-12 | 4800.00 | 1.55 | 2.35 | 2017-05-14 | 25 |
| 0.1  | 1.6  | 19 | 2017-05-08 | 2879.00 | 5.47 | 0.64 | 2017-05-10 | 10 |
| 0.05 | 0.7  | 14 | 2017-05-16 | 1834.00 | 1.12 | 1.34 | 2017-05-18 | 8  |
| 0.05 | 0.7  | 14 | 2017-05-16 | 4800.00 | 0.56 | 1.24 | 2017-05-18 | 23 |
| 0.05 | 0.9  | 18 | 2017-07-01 | 4936.00 | 1.52 | 0.72 | 2017-07-03 | 10 |
| 0.05 | 0.7  | 14 | 2017-05-29 | 2640.00 | 2.40 | 1.67 | 2017-05-31 | 6  |
| 0.05 | 0.75 | 15 | 2017-06-11 | 4469.00 | 0.89 | 1.81 | 2017-06-13 | 10 |
| 0.1  | 1.15 | 15 | 2017-06-14 | 2569.00 | 1.25 | 1.46 | 2017-06-16 | 11 |
| 0.05 | 0.7  | 14 | 2017-06-22 | 4936.00 | 2.23 | 2.22 | 2017-06-24 | 33 |
| 0.05 | 0.7  | 14 | 2017-06-05 | 4936.00 | 0.64 | 2.49 | 2017-06-07 | 6  |
| 0.05 | 0.7  | 14 | 2017-06-20 | 2232.00 | 1.39 | 0.54 | 2017-06-22 | 9  |
| 0.05 | 0.85 | 17 | 2017-06-08 | 4936.00 | 8.14 | 1.30 | 2017-06-10 | 10 |
| 0.05 | 0.7  | 14 | 2017-07-01 | 2286.00 | 1.68 | 0.88 | 2017-07-03 | 9  |
| 0.05 | 0.7  | 14 | 2017-06-21 | 4936.00 | 1.15 | 1.48 | 2017-06-23 | 20 |
| 0.1  | 1.6  | 21 | 2017-05-31 | 4800.00 | 3.31 | 1.54 | 2017-06-02 | 12 |
| 0.05 | 0.7  | 14 | 2017-07-03 | 4936.00 | 0.79 | 1.58 | 2017-07-05 | 19 |
| 0.05 | 0.7  | 14 | 2017-06-22 | 4936.00 | 2.00 | 3.20 | 2017-06-24 | 25 |
| 0.05 | 0.7  | 14 | 2017-06-21 | 2562.00 | 2.53 | 1.84 | 2017-06-23 | 14 |
| 0.05 | 0.7  | 14 | 2017-06-15 | 4936.00 | 1.10 | 1.76 | 2017-06-17 | 23 |
| 0.05 | 0.75 | 15 | 2017-07-11 | 2988.00 | 0.27 | 0.95 | 2017-07-13 | 10 |
| 0.05 | 0.7  | 14 | 2017-06-17 | 4936.00 | 1.17 | 2.10 | 2017-06-19 | 22 |
| 0.05 | 1.2  | 24 | 2017-06-05 | 4936.00 | 4.64 | 1.90 | 2017-06-07 | 8  |
| 0.05 | 0.7  | 14 | 2017-06-27 | 1151.00 | 1.21 | 0.59 | 2017-06-29 | 5  |
| 0.05 | 0.7  | 14 | 2017-07-04 | 4628.00 | 2.07 | 1.51 | 2017-07-06 | 19 |
| 0.1  | 1.45 | 22 | 2017-07-13 | 4936.00 | 2.71 | 0.73 | 2017-07-15 | 19 |
| 0.05 | 0.8  | 16 | 2017-07-26 | 4936.00 | 1.93 | 1.48 | 2017-07-28 | 24 |
| 0.05 | 0.8  | 16 | 2017-07-11 | 4936.00 | 0.36 | 1.63 | 2017-07-13 | 28 |
| 0.05 | 0.7  | 14 | 2017-06-12 | 4388.00 | 0.10 | 0.83 | 2017-06-14 | 22 |
| 0.05 | 0.7  | 14 | 2017-06-28 | 4936.00 | 1.46 | 0.70 | 2017-06-30 | 19 |
| 0.05 | 0.7  | 14 | 2017-06-18 | 4936.00 | 4.21 | 1.36 | 2017-06-20 | 12 |
| 0.05 | 0.7  | 14 | 2017-07-17 | 4936.00 | 2.24 | 0.80 | 2017-07-19 | 7  |
| 0.05 | 0.7  | 14 | 2017-06-23 | 2848.00 | 1.22 | 0.74 | 2017-06-25 | 17 |
| 0.05 | 0.7  | 14 | 2017-06-30 | 4936.00 | 1.52 | 1.17 | 2017-07-02 | 14 |
| 0.05 | 0.7  | 14 | 2017-07-20 | 1213.00 | 0.72 | 0.40 | 2017-07-22 | 6  |
| 0.05 | 0.7  | 14 | 2017-06-21 | 4936.00 | 0.78 | 1.27 | 2017-06-23 | 12 |
| 0.05 | 0.7  | 14 | 2017-07-16 | 4936.00 | 2.12 | 1.67 | 2017-07-18 | 20 |
| 0.05 | 0.7  | 14 | 2017-06-21 | 4936.00 | 1.29 | 0.88 | 2017-06-23 | 12 |
| 0.05 | 0.7  | 14 | 2017-06-21 | 4936.00 | 1.01 | 2.05 | 2017-06-23 | 16 |
| 0.05 | 0.7  | 14 | 2017-06-27 | 4936.00 | 0.78 | 1.32 | 2017-06-29 | 14 |
| 0.05 | 0.8  | 16 | 2017-06-24 | 1135.00 | 0.41 | 1.03 | 2017-06-26 | 5  |
| 0.05 | 0.7  | 14 | 2017-07-21 | 4936.00 | 0.65 | 1.72 | 2017-07-23 | 22 |
| 0.05 | 0.7  | 14 | 2017-07-03 | 3412.00 | 0.28 | 1.19 | 2017-07-05 | 10 |
| 0.05 | 0.7  | 14 | 2017-06-26 | 3737.00 | 0.83 | 0.48 | 2017-06-28 | 5  |
| 0.05 | 0.7  | 14 | 2017-07-08 | 4936.00 | 0.68 | 1.47 | 2017-07-10 | 28 |
| 0.05 | 0.7  | 14 | 2017-06-27 | 4936.00 | 1.72 | 2.17 | 2017-06-29 | 7  |
| 0.1  | 1.55 | 24 | 2017-06-25 | 1761.00 | 1.22 | 1.04 | 2017-06-27 | 5  |

|      |      |    |            |         |       |      |            |    |
|------|------|----|------------|---------|-------|------|------------|----|
| 0.05 | 0.7  | 14 | 2017-07-21 | 4936.00 | 1.07  | 1.24 | 2017-07-23 | 24 |
| 0.05 | 0.7  | 14 | 2017-08-19 | 1241.00 | 2.34  | 1.23 | 2017-08-21 | 9  |
| 0.05 | 0.8  | 16 | 2017-07-07 | 4936.00 | 10.50 | 1.18 | 2017-07-09 | 16 |
| 0.05 | 0.8  | 16 | 2017-07-04 | 2795.00 | 0.54  | 0.94 | 2017-07-06 | 10 |
| 0.05 | 0.7  | 14 | 2017-08-28 | 4936.00 | 0.75  | 1.50 | 2017-08-30 | 31 |
| 0.05 | 0.7  | 14 | 2017-07-14 | 2571.00 | 3.04  | 0.80 | 2017-07-16 | 9  |
| 0.05 | 0.7  | 14 | 2017-07-28 | 4098.00 | 1.23  | 0.98 | 2017-07-30 | 18 |
| 0.05 | 0.7  | 14 | 2017-07-20 | 903.00  | 2.53  | 0.52 | 2017-07-22 | 4  |
| 0.05 | 0.7  | 14 | 2017-07-29 | 4739.00 | 2.01  | 1.82 | 2017-07-31 | 23 |
| 0.05 | 0.7  | 14 | 2017-07-12 | 4936.00 | 1.01  | 1.15 | 2017-07-14 | 16 |
| 0.05 | 0.7  | 14 | 2017-08-12 | 1857.00 | 1.75  | 0.83 | 2017-08-14 | 10 |
| 0.05 | 0.7  | 14 | 2017-07-10 | 3073.00 | 0.68  | 0.88 | 2017-07-12 | 8  |
| 0.05 | 0.9  | 18 | 2017-08-15 | 1955.00 | 1.40  | 0.84 | 2017-08-17 | 7  |
| 0.05 | 0.7  | 14 | 2017-07-19 | 2597.00 | 1.47  | 0.85 | 2017-07-21 | 10 |
| 0.05 | 0.9  | 18 | 2017-08-12 | 4558.00 | 5.22  | 0.83 | 2017-08-14 | 8  |
| 0.05 | 0.7  | 14 | 2017-08-11 | 3501.00 | 2.93  | 1.04 | 2017-08-13 | 9  |
| 0.05 | 0.7  | 14 | 2017-07-30 | 4936.00 | 0.98  | 0.67 | 2017-08-01 | 14 |
| 0.05 | 0.7  | 14 | 2017-12-23 | 553.00  | 7.51  | 0.71 | 2017-12-25 | 1  |
| 0.05 | 0.7  | 14 | 2017-08-06 | 4936.00 | 4.05  | 1.18 | 2017-08-08 | 20 |
| 0.05 | 0.7  | 14 | 2017-08-18 | 2612.00 | 4.19  | 0.74 | 2017-08-20 | 15 |
| 0.05 | 0.8  | 16 | 2017-07-28 | 2646.00 | 0.38  | 1.14 | 2017-07-30 | 11 |
| 0.05 | 0.7  | 14 | 2017-07-30 | 2840.00 | 6.57  | 0.84 | 2017-08-01 | 6  |
| 0.05 | 0.7  | 14 | 2017-08-21 | 4936.00 | 4.39  | 1.24 | 2017-08-23 | 11 |
| 0.05 | 0.7  | 14 | 2017-07-22 | 2607.00 | 2.60  | 0.81 | 2017-07-24 | 11 |
| 0.05 | 0.8  | 16 | 2017-08-12 | 4936.00 | 0.77  | 1.75 | 2017-08-14 | 45 |
| 0.05 | 0.7  | 14 | 2017-08-12 | 4220.00 | 2.08  | 0.87 | 2017-08-14 | 20 |
| 0.05 | 0.7  | 14 | 2017-08-12 | 3788.00 | 2.06  | 0.96 | 2017-08-14 | 11 |
| 0.05 | 0.7  | 14 | 2017-07-24 | 4936.00 | 1.50  | 2.46 | 2017-07-26 | 19 |
| 0.05 | 0.7  | 14 | 2017-09-06 | 1355.00 | 1.08  | 0.59 | 2017-09-08 | 9  |
| 0.1  | 1.3  | 19 | 2017-08-10 | 1339.00 | 0.53  | 1.00 | 2017-08-12 | 6  |
| 0.1  | 1.4  | 21 | 2017-07-28 | 4910.00 | 1.58  | 0.94 | 2017-07-30 | 20 |
| 0.05 | 0.7  | 14 | 2017-07-17 | 4771.00 | 0.34  | 0.43 | 2017-07-19 | 26 |
| 0.05 | 0.7  | 14 | 2017-10-15 | 1793.00 | 1.05  | 1.27 | 2017-10-17 | 1  |
| 0.05 | 0.7  | 14 | 2017-09-06 | 641.00  | 1.97  | 0.52 | 2017-09-08 | 3  |
| 0.05 | 0.7  | 14 | 2017-08-23 | 2757.00 | 2.36  | 0.67 | 2017-08-25 | 13 |
| 0.05 | 0.7  | 14 | 2017-10-28 | 1792.00 | 1.51  | 0.78 | 2017-10-30 | 13 |
| 0.05 | 0.7  | 14 | 2017-08-04 | 1419.00 | 0.48  | 0.42 | 2017-08-06 | 7  |
| 0.05 | 0.7  | 14 | 2017-09-01 | 4936.00 | 0.57  | 0.66 | 2017-09-03 | 21 |
| 0.05 | 0.8  | 16 | 2017-08-02 | 927.00  | 0.45  | 0.51 | 2017-08-04 | 4  |
| 0.05 | 0.8  | 16 | 2017-08-02 | 4070.00 | 0.28  | 1.28 | 2017-08-04 | 21 |
| 0.1  | 1    | 14 | 2017-08-23 | 4936.00 | 0.48  | 1.49 | 2017-08-25 | 27 |
| 0.05 | 0.7  | 14 | 2017-08-28 | 3018.00 | 0.68  | 0.16 | 2017-08-30 | 11 |
| 0.05 | 0.8  | 16 | 2017-08-08 | 4936.00 | 1.45  | 1.28 | 2017-08-10 | 14 |
| 0.05 | 0.7  | 14 | 2017-08-07 | 4380.00 | 0.69  | 0.24 | 2017-08-09 | 11 |
| 0.05 | 0.9  | 18 | 2017-08-12 | 3772.00 | 0.39  | 0.75 | 2017-08-14 | 13 |
| 0.05 | 0.7  | 14 | 2017-08-12 | 3008.00 | 0.58  | 0.85 | 2017-08-14 | 5  |
| 0.05 | 0.7  | 14 | 2017-07-29 | 1244.00 | 2.46  | 0.85 | 2017-07-31 | 3  |
| 0.05 | 0.7  | 14 | 2017-08-11 | 4936.00 | 0.36  | 1.02 | 2017-08-13 | 27 |
| 0.05 | 0.7  | 14 | 2017-08-10 | 4936.00 | 3.28  | 1.31 | 2017-08-12 | 49 |
| 0.05 | 0.75 | 15 | 2017-08-24 | 4936.00 | 0.52  | 0.35 | 2017-08-26 | 21 |

|      |      |    |            |         |      |      |            |    |
|------|------|----|------------|---------|------|------|------------|----|
| 0.05 | 0.7  | 14 | 2017-08-29 | 3159.00 | 4.15 | 1.03 | 2017-08-31 | 12 |
| 0.05 | 0.7  | 14 | 2017-08-28 | 3066.00 | 0.82 | 0.70 | 2017-08-30 | 12 |
| 0.05 | 0.7  | 14 | 2017-08-28 | 4126.00 | 1.24 | 1.26 | 2017-08-30 | 10 |
| 0.05 | 0.7  | 14 | 2017-08-20 | 4936.00 | 1.06 | 2.49 | 2017-08-22 | 13 |
| 0.05 | 0.7  | 14 | 2017-08-21 | 2227.00 | 1.44 | 0.55 | 2017-08-23 | 6  |
| 0.05 | 0.7  | 14 | 2017-08-24 | 4936.00 | 0.07 | 1.27 | 2017-08-26 | 20 |
| 0.05 | 0.7  | 14 | 2017-08-19 | 4936.00 | 2.08 | 1.67 | 2017-08-21 | 14 |
| 0.05 | 0.7  | 14 | 2017-08-25 | 4936.00 | 1.03 | 1.39 | 2017-08-27 | 16 |
| 0.05 | 0.7  | 14 | 2017-08-21 | 2344.00 | 1.88 | 0.88 | 2017-08-23 | 10 |
| 0.05 | 0.7  | 14 | 2017-09-16 | 3714.00 | 1.50 | 1.04 | 2017-09-18 | 9  |
| 0.1  | 1    | 14 | 2017-09-09 | 3239.00 | 1.56 | 1.99 | 2017-09-11 | 11 |
| 0.05 | 0.7  | 14 | 2017-09-10 | 3113.00 | 4.88 | 0.81 | 2017-09-12 | 10 |
| 0.05 | 0.7  | 14 | 2017-09-08 | 4936.00 | 1.88 | 1.69 | 2017-09-10 | 25 |
| 0.05 | 0.75 | 15 | 2017-08-30 | 3020.00 | 4.05 | 1.49 | 2017-09-01 | 5  |
| 0.1  | 1    | 14 | 2017-09-02 | 4000.00 | 0.15 | 1.24 | 2017-09-04 | 17 |
| 0.05 | 0.7  | 14 | 2017-08-23 | 4936.00 | 2.74 | 0.92 | 2017-08-25 | 20 |
| 0.1  | 1    | 14 | 2017-08-27 | 4936.00 | 1.71 | 2.04 | 2017-08-29 | 14 |
| 0.05 | 0.7  | 14 | 2017-08-30 | 1302.00 | 0.61 | 0.59 | 2017-09-01 | 10 |
| 0.05 | 0.7  | 14 | 2017-08-27 | 635.00  | 1.80 | 0.76 | 2017-08-29 | 3  |
| 0.05 | 0.7  | 14 | 2017-10-17 | 1469.00 | 1.46 | 0.35 | 2017-10-19 | 10 |
| 0.05 | 0.7  | 14 | 2017-09-15 | 4046.00 | 5.90 | 1.91 | 2017-09-17 | 9  |
| 0.05 | 0.7  | 14 | 2017-09-04 | 4936.00 | 1.19 | 0.83 | 2017-09-06 | 15 |
| 0.05 | 0.7  | 14 | 2017-08-29 | 4936.00 | 1.90 | 1.17 | 2017-08-31 | 11 |
| 0.05 | 0.7  | 14 | 2017-09-28 | 3388.00 | 1.18 | 0.78 | 2017-09-30 | 27 |
| 0.05 | 0.7  | 14 | 2017-10-15 | 4936.00 | 4.49 | 1.73 | 2017-10-17 | 9  |
| 0.05 | 0.7  | 14 | 2017-09-19 | 3062.00 | 0.32 | 1.27 | 2017-09-21 | 15 |
| 0.05 | 0.7  | 14 | 2017-09-22 | 4183.00 | 2.19 | 1.13 | 2017-09-24 | 11 |
| 0.05 | 0.7  | 14 | 2017-09-04 | 4936.00 | 3.73 | 1.81 | 2017-09-06 | 19 |
| 0.05 | 0.8  | 16 | 2017-09-08 | 1802.00 | 1.98 | 0.36 | 2017-09-10 | 7  |
| 0.05 | 0.7  | 14 | 2017-09-12 | 4528.00 | 3.29 | 0.84 | 2017-09-14 | 8  |
| 0.05 | 0.7  | 14 | 2017-09-08 | 4593.00 | 1.27 | 0.95 | 2017-09-10 | 17 |
| 0.05 | 0.7  | 14 | 2017-09-24 | 2072.00 | 6.48 | 1.17 | 2017-09-26 | 9  |
| 0.1  | 1    | 14 | 2017-10-01 | 4936.00 | 0.71 | 1.38 | 2017-10-03 | 27 |
| 0.05 | 0.7  | 14 | 2017-09-12 | 4936.00 | 1.29 | 2.52 | 2017-09-14 | 25 |
| 0.05 | 0.7  | 14 | 2017-09-15 | 2672.00 | 4.58 | 1.20 | 2017-09-17 | 5  |
| 0.1  | 1    | 14 | 2017-09-19 | 4603.00 | 1.48 | 2.07 | 2017-09-21 | 20 |
| 0.05 | 0.7  | 14 | 2017-09-20 | 3628.00 | 5.18 | 1.13 | 2017-09-22 | 14 |
| 0.05 | 0.7  | 14 | 2017-10-01 | 4936.00 | 2.07 | 1.92 | 2017-10-03 | 25 |
| 0.05 | 0.7  | 14 | 2017-10-02 | 2152.00 | 1.76 | 0.84 | 2017-10-04 | 12 |
| 0.05 | 0.9  | 18 | 2017-10-06 | 2126.00 | 1.14 | 0.86 | 2017-10-08 | 8  |
| 0.05 | 0.7  | 14 | 2017-11-08 | 4936.00 | 0.96 | 1.78 | 2017-11-10 | 27 |
| 0.05 | 0.7  | 14 | 2017-09-19 | 4936.00 | 5.29 | 1.00 | 2017-09-21 | 10 |
| 0.05 | 0.85 | 17 | 2017-10-27 | 4936.00 | 0.40 | 0.86 | 2017-10-29 | 40 |
| 0.05 | 0.7  | 14 | 2017-10-01 | 1285.00 | 0.69 | 0.58 | 2017-10-03 | 4  |
| 0.05 | 0.7  | 14 | 2017-10-08 | 4936.00 | 0.22 | 3.84 | 2017-10-10 | 39 |
| 0.05 | 0.7  | 14 | 2017-09-22 | 4119.00 | 0.90 | 1.29 | 2017-09-24 | 10 |
| 0.05 | 0.7  | 14 | 2017-10-08 | 2172.00 | 2.69 | 0.87 | 2017-10-10 | 6  |
| 0.05 | 0.7  | 14 | 2017-09-21 | 3206.00 | 2.65 | 0.74 | 2017-09-23 | 12 |
| 0.1  | 1    | 14 | 2017-09-12 | 4936.00 | 1.49 | 0.98 | 2017-09-14 | 18 |
| 0.05 | 0.7  | 14 | 2017-09-23 | 1360.00 | 1.15 | 0.63 | 2017-09-25 | 7  |

|      |      |    |            |         |      |      |            |    |
|------|------|----|------------|---------|------|------|------------|----|
| 0.1  | 1.45 | 22 | 2017-09-30 | 2807.00 | 3.77 | 0.80 | 2017-10-02 | 9  |
| 0.05 | 1.2  | 24 | 2017-12-17 | 4936.00 | 0.41 | 1.18 | 2017-12-19 | 16 |
| 0.1  | 1    | 14 | 2017-09-17 | 4936.00 | 1.28 | 1.53 | 2017-09-19 | 14 |
| 0.05 | 0.7  | 14 | 2017-10-01 | 4936.00 | 0.35 | 1.57 | 2017-10-03 | 25 |
| 0.05 | 0.7  | 14 | 2017-09-30 | 3341.00 | 3.39 | 1.38 | 2017-10-02 | 16 |
| 0.05 | 0.7  | 14 | 2017-11-04 | 3690.00 | 0.75 | 0.91 | 2017-11-06 | 24 |
| 0.05 | 0.7  | 14 | 2017-10-02 | 3781.00 | 2.07 | 0.45 | 2017-10-04 | 17 |
| 0.05 | 0.7  | 14 | 2017-11-03 | 4934.00 | 1.23 | 0.89 | 2017-11-05 | 20 |
| 0.05 | 0.7  | 14 | 2017-10-06 | 4936.00 | 2.17 | 2.31 | 2017-10-08 | 39 |
| 0.05 | 0.7  | 14 | 2017-10-08 | 3143.00 | 2.48 | 1.52 | 2017-10-10 | 10 |
| 0.05 | 0.7  | 14 | 2017-09-24 | 4936.00 | 0.70 | 0.85 | 2017-09-26 | 11 |
| 0.05 | 0.7  | 14 | 2017-11-05 | 3757.00 | 0.84 | 1.06 | 2017-11-07 | 15 |
| 0.05 | 0.8  | 16 | 2017-10-26 | 4747.00 | 0.69 | 2.23 | 2017-10-28 | 14 |
| 0.05 | 0.7  | 14 | 2017-10-13 | 4936.00 | 1.28 | 1.41 | 2017-10-15 | 30 |
| 0.05 | 0.75 | 15 | 2017-11-01 | 4522.00 | 1.24 | 1.36 | 2017-11-03 | 19 |
| 0.05 | 0.8  | 16 | 2017-10-19 | 4936.00 | 0.68 | 1.39 | 2017-10-21 | 17 |
| 0.05 | 0.9  | 18 | 2017-11-22 | 2690.00 | 1.37 | 1.32 | 2017-11-24 | 14 |
| 0.05 | 0.7  | 14 | 2017-11-02 | 968.00  | 3.60 | 0.96 | 2017-11-04 | 4  |
| 0.05 | 0.7  | 14 | 2017-11-01 | 4936.00 | 3.24 | 1.68 | 2017-11-03 | 11 |
| 0.1  | 1.45 | 22 | 2017-10-26 | 4204.00 | 3.06 | 0.80 | 2017-10-28 | 9  |
| 0.05 | 0.7  | 14 | 2017-10-19 | 3915.00 | 0.94 | 0.75 | 2017-10-21 | 16 |
| 0.05 | 0.7  | 14 | 2017-11-10 | 4936.00 | 1.10 | 0.96 | 2017-11-12 | 20 |
| 0.05 | 0.7  | 14 | 2017-10-20 | 1584.00 | 3.29 | 0.79 | 2017-10-22 | 6  |
| 0.05 | 0.7  | 14 | 2017-10-27 | 3128.00 | 0.77 | 1.32 | 2017-10-29 | 7  |
| 0.05 | 0.7  | 14 | 2017-11-04 | 2365.00 | 1.24 | 0.86 | 2017-11-06 | 9  |
| 0.05 | 0.7  | 14 | 2017-11-07 | 4257.00 | 0.48 | 1.61 | 2017-11-09 | 14 |
| 0.1  | 1.55 | 20 | 2017-10-06 | 2263.00 | 3.14 | 1.34 | 2017-10-08 | 9  |
| 0.05 | 0.7  | 14 | 2017-10-23 | 1306.00 | 0.51 | 0.68 | 2017-10-25 | 8  |
| 0.05 | 0.7  | 14 | 2017-11-12 | 4739.00 | 1.10 | 0.48 | 2017-11-14 | 17 |
| 0.05 | 0.7  | 14 | 2017-11-04 | 3484.00 | 1.17 | 1.69 | 2017-11-06 | 17 |
| 0.05 | 0.7  | 14 | 2017-11-21 | 4376.00 | 2.94 | 1.78 | 2017-11-23 | 10 |
| 0.05 | 0.7  | 14 | 2017-12-10 | 4936.00 | 0.66 | 0.93 | 2017-12-12 | 18 |
| 0.05 | 0.7  | 14 | 2017-12-10 | 1359.00 | 1.76 | 0.86 | 2017-12-12 | 6  |
| 0.05 | 0.8  | 16 | 2017-11-05 | 1810.00 | 2.65 | 0.73 | 2017-11-07 | 5  |
| 0.05 | 0.7  | 14 | 2018-01-02 | 1416.00 | 1.26 | 0.69 | 2018-01-04 | 1  |
| 0.05 | 0.7  | 14 | 2017-11-21 | 4936.00 | 1.47 | 1.15 | 2017-11-23 | 11 |
| 0.05 | 0.7  | 14 | 2017-11-03 | 4936.00 | 1.04 | 0.85 | 2017-11-05 | 20 |
| 0.05 | 0.8  | 16 | 2017-11-05 | 3361.00 | 0.35 | 2.01 | 2017-11-07 | 10 |
| 0.05 | 0.7  | 14 | 2017-11-18 | 4936.00 | 1.23 | 1.33 | 2017-11-20 | 43 |
| 0.05 | 0.7  | 14 | 2017-11-05 | 2350.00 | 1.26 | 1.24 | 2017-11-07 | 7  |
| 0.05 | 0.7  | 14 | 2017-12-25 | 2090.00 | 2.05 | 0.67 | 2017-12-27 | 4  |
| 0.05 | 0.7  | 14 | 2017-11-10 | 2897.00 | 1.12 | 1.49 | 2017-11-12 | 14 |
| 0.05 | 1    | 20 | 2017-11-11 | 2473.00 | 0.24 | 0.27 | 2017-11-13 | 5  |
| 0.05 | 0.7  | 14 | 2017-12-10 | 4936.00 | 0.38 | 2.11 | 2017-12-12 | 25 |
| 0.05 | 1.1  | 22 | 2017-11-22 | 4936.00 | 2.94 | 1.21 | 2017-11-24 | 17 |
| 0.05 | 0.95 | 19 | 2017-11-15 | 2822.00 | 0.85 | 0.90 | 2017-11-17 | 18 |
| 0.05 | 1    | 20 | 2017-11-28 | 4936.00 | 2.79 | 0.96 | 2017-11-30 | 26 |
| 0.05 | 0.9  | 18 | 2018-01-11 | 3442.00 | 0.18 | 2.20 | 2018-01-13 | 15 |
| 0.05 | 0.8  | 16 | 2017-11-18 | 3304.00 | 1.73 | 0.86 | 2017-11-20 | 9  |
| 0.05 | 0.7  | 14 | 2017-11-16 | 894.00  | 1.03 | 0.47 | 2017-11-18 | 6  |

|      |      |    |            |         |       |      |            |    |
|------|------|----|------------|---------|-------|------|------------|----|
| 0.05 | 0.7  | 14 | 2017-12-07 | 3320.00 | 1.12  | 1.08 | 2017-12-09 | 25 |
| 0.05 | 0.7  | 14 | 2017-11-19 | 2747.00 | 1.31  | 1.09 | 2017-11-21 | 10 |
| 0.05 | 0.7  | 14 | 2017-11-24 | 2038.00 | 1.27  | 0.71 | 2017-11-26 | 8  |
| 0.05 | 0.7  | 14 | 2017-11-25 | 1108.00 | 1.05  | 0.64 | 2017-11-27 | 4  |
| 0.05 | 0.7  | 14 | 2017-11-20 | 4936.00 | 0.75  | 1.52 | 2017-11-22 | 20 |
| 0.05 | 0.7  | 14 | 2017-11-05 | 4936.00 | 2.15  | 1.58 | 2017-11-07 | 25 |
| 0.05 | 0.7  | 14 | 2017-12-10 | 4205.00 | 1.82  | 0.79 | 2017-12-12 | 16 |
| 0.05 | 0.7  | 14 | 2017-11-19 | 4936.00 | 0.95  | 1.86 | 2017-11-21 | 31 |
| 0.05 | 0.7  | 14 | 2017-12-11 | 4936.00 | 1.37  | 2.88 | 2017-12-13 | 13 |
| 0.05 | 0.7  | 14 | 2017-11-24 | 1717.00 | 0.48  | 1.09 | 2017-11-26 | 19 |
| 0.05 | 0.7  | 14 | 2017-11-27 | 4936.00 | 1.27  | 0.77 | 2017-11-29 | 16 |
| 0.05 | 0.9  | 18 | 2017-12-01 | 291.00  | 1.43  | 1.24 | 2017-12-03 | 5  |
| 0.05 | 1    | 20 | 2017-11-13 | 3727.00 | 0.34  | 0.81 | 2017-11-15 | 14 |
| 0.05 | 0.9  | 18 | 2017-12-02 | 3125.00 | 2.87  | 2.03 | 2017-12-04 | 8  |
| 0.05 | 0.7  | 14 | 2018-03-09 | 2394.00 | 0.92  | 1.15 | 2018-03-11 | 11 |
| 0.05 | 1.2  | 24 | 2017-12-22 | 2857.00 | 0.98  | 0.85 | 2017-12-24 | 8  |
| 0.05 | 0.7  | 14 | 2018-01-02 | 4936.00 | 1.68  | 0.52 | 2018-01-04 | 12 |
| 0.1  | 2.1  | 21 | 2017-11-23 | 4936.00 | 1.91  | 1.73 | 2017-11-25 | 20 |
| 0.05 | 0.7  | 14 | 2018-01-02 | 3001.00 | 1.20  | 0.67 | 2018-01-04 | 12 |
| 0.1  | 1.55 | 20 | 2017-11-26 | 3433.00 | 1.80  | 0.93 | 2017-11-28 | 13 |
| 0.05 | 1.15 | 23 | 2017-12-02 | 4936.00 | 3.00  | 0.63 | 2017-12-04 | 16 |
| 0.05 | 0.7  | 14 | 2017-12-02 | 3699.00 | 1.49  | 1.01 | 2017-12-04 | 10 |
| 0.05 | 0.7  | 14 | 2017-11-25 | 2681.00 | 7.38  | 1.47 | 2017-11-27 | 8  |
| 0.05 | 0.7  | 14 | 2017-12-06 | 3062.00 | 0.44  | 1.21 | 2017-12-08 | 12 |
| 0.05 | 0.7  | 14 | 2017-12-31 | 4936.00 | 0.88  | 0.45 | 2018-01-02 | 21 |
| 0.05 | 0.7  | 14 | 2017-12-08 | 4936.00 | 1.15  | 1.31 | 2017-12-10 | 22 |
| 0.05 | 0.7  | 14 | 2017-12-11 | 3535.00 | 0.76  | 0.89 | 2017-12-13 | 7  |
| 0.05 | 0.7  | 14 | 2017-12-07 | 4936.00 | 0.92  | 1.70 | 2017-12-09 | 20 |
| 0.05 | 0.7  | 14 | 2017-12-25 | 4045.00 | 0.41  | 1.62 | 2017-12-27 | 24 |
| 0.05 | 0.7  | 14 | 2017-12-13 | 1458.00 | 1.80  | 1.47 | 2017-12-15 | 7  |
| 0.05 | 0.7  | 14 | 2017-12-23 | 1477.00 | 1.94  | 0.62 | 2017-12-25 | 5  |
| 0.05 | 0.7  | 14 | 2017-12-29 | 2342.00 | 42.00 | 0.81 | 2017-12-31 | 13 |
| 0.05 | 0.7  | 14 | 2017-12-15 | 3994.00 | 1.43  | 1.24 | 2017-12-17 | 10 |
| 0.05 | 0.7  | 14 | 2017-12-04 | 3099.00 | 1.30  | 0.84 | 2017-12-06 | 9  |
| 0.05 | 0.7  | 14 | 2017-12-09 | 1820.00 | 1.07  | 0.56 | 2017-12-11 | 5  |
| 0.05 | 0.8  | 16 | 2017-12-21 | 1523.00 | 0.62  | 1.28 | 2017-12-23 | 11 |
| 0.05 | 0.7  | 14 | 2017-12-25 | 4936.00 | 1.44  | 0.74 | 2017-12-27 | 15 |
| 0.05 | 0.7  | 14 | 2018-01-22 | 1724.00 | 1.71  | 1.37 | 2018-01-24 | 9  |
| 0.05 | 1.2  | 24 | 2017-12-25 | 3447.00 | 1.62  | 0.85 | 2017-12-27 | 10 |
| 0.05 | 1.2  | 24 | 2018-01-13 | 4936.00 | 0.76  | 1.45 | 2018-01-15 | 50 |
| 0.05 | 1    | 20 | 2017-12-28 | 1764.00 | 0.74  | 0.74 | 2017-12-30 | 3  |
| 0.05 | 1.05 | 21 | 2017-12-26 | 4936.00 | 2.60  | 1.01 | 2017-12-28 | 21 |
| 0.05 | 0.7  | 14 | 2017-12-31 | 4758.00 | 0.86  | 0.77 | 2018-01-02 | 19 |
| 0.05 | 0.7  | 14 | 2018-01-03 | 4936.00 | 3.23  | 1.13 | 2018-01-05 | 22 |
| 0.05 | 0.8  | 16 | 2018-01-02 | 2093.00 | 0.37  | 0.64 | 2018-01-04 | 9  |
| 0.05 | 0.9  | 18 | 2018-01-26 | 2120.00 | 0.48  | 0.71 | 2018-01-28 | 10 |
| 0.05 | 1.05 | 21 | 2018-01-02 | 4936.00 | 0.91  | 2.41 | 2018-01-04 | 28 |
| 0.05 | 0.7  | 14 | 2018-01-05 | 2683.00 | 0.68  | 0.98 | 2018-01-07 | 17 |
| 0.05 | 0.7  | 14 | 2018-01-08 | 2580.00 | 0.63  | 0.60 | 2018-01-10 | 10 |
| 0.05 | 0.7  | 14 | 2018-01-09 | 2576.00 | 0.46  | 0.56 | 2018-01-11 | 10 |

|      |      |    |            |         |      |      |            |    |
|------|------|----|------------|---------|------|------|------------|----|
| 0.05 | 0.7  | 14 | 2018-01-11 | 4621.00 | 1.50 | 1.02 | 2018-01-13 | 8  |
| 0.05 | 0.7  | 14 | 2018-01-26 | 1560.00 | 0.36 | 0.74 | 2018-01-28 | 31 |
| 0.05 | 0.7  | 14 | 2018-01-28 | 4856.00 | 1.32 | 2.15 | 2018-01-30 | 17 |
| 0.05 | 1    | 20 | 2018-01-26 | 1687.00 | 0.30 | 1.86 | 2018-01-28 | 4  |
| 0.05 | 0.7  | 14 | 2018-03-07 | 1232.00 | 0.61 | 0.27 | 2018-03-09 | 7  |
| 0.05 | 0.8  | 16 | 2018-01-15 | 2250.00 | 2.35 | 1.05 | 2018-01-17 | 9  |
| 0.05 | 0.8  | 16 | 2018-01-13 | 3193.00 | 0.46 | 1.10 | 2018-01-15 | 12 |
| 0.1  | 1.8  | 21 | 2018-01-12 | 4936.00 | 4.41 | 2.83 | 24         | 46 |
| 0.05 | 0.7  | 14 | 2018-01-21 | 4936.00 | 2.28 | 0.81 | 2018-01-23 | 9  |
| 0.05 | 0.7  | 14 | 2018-01-29 | 2400.00 | 1.12 | 1.11 | 2018-01-31 | 8  |
| 0.05 | 0.7  | 14 | 2018-01-29 | 2960.00 | 1.38 | 3.35 | 2018-01-31 | 11 |
| 0.1  | 1.35 | 20 | 2018-01-07 | 2138.00 | 3.97 | 0.50 | 2018-01-09 | 10 |
| 0.05 | 0.8  | 16 | 2018-01-26 | 4856.00 | 0.36 | 2.95 | 2018-01-28 | 16 |
| 0.05 | 0.7  | 14 | 2018-01-21 | 4936.00 | 1.70 | 1.70 | 2018-01-23 | 21 |
| 0.05 | 0.8  | 16 | 2018-01-20 | 4936.00 | 0.73 | 0.77 | 2018-01-22 | 17 |
| 0.05 | 0.7  | 14 | 2018-01-24 | 4936.00 | 1.44 | 1.39 | 2018-01-26 | 16 |
| 0.05 | 1.1  | 22 | 2018-01-04 | 2085.00 | 0.30 | 1.02 | 2018-01-06 | 9  |
| 0.05 | 0.7  | 14 |            | 2960.00 | 1.38 | 3.35 |            |    |
| 0.05 | 1.25 | 25 | 2018-02-05 | 4856.00 | 2.70 | 1.21 | 2018-02-07 | 15 |
| 0.05 | 1.05 | 21 | 2018-01-19 | 4936.00 | 0.17 | 1.86 | 2018-01-21 | 23 |
| 0.05 | 0.7  | 14 | 2018-03-10 | 616.00  | 1.53 | 0.18 | 2018-03-12 | 1  |
| 0.05 | 0.7  | 14 | 2018-03-21 | 3638.00 | 4.72 | 0.70 | 2018-03-23 |    |
| 0.1  | 1.4  | 21 | 2018-02-05 | 4856.00 | 2.25 | 2.21 | 2018-02-07 | 7  |
| 0.05 | 0.85 | 17 | 2018-01-23 | 2078.00 | 0.51 | 2.34 | 2018-01-25 | 7  |
| 0.1  | 1.4  | 21 | 2018-02-06 | 1172.00 | 0.78 | 0.89 | 2018-02-08 | 5  |
| 0.05 | 0.7  | 14 | 2018-01-27 | 3625.00 | 2.30 | 1.62 | 2018-01-29 | 20 |
| 0.1  | 2.5  | 25 | 2018-02-25 | 1558.00 | 2.48 | 0.64 | 2018-02-27 | 7  |

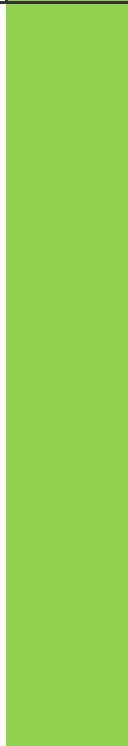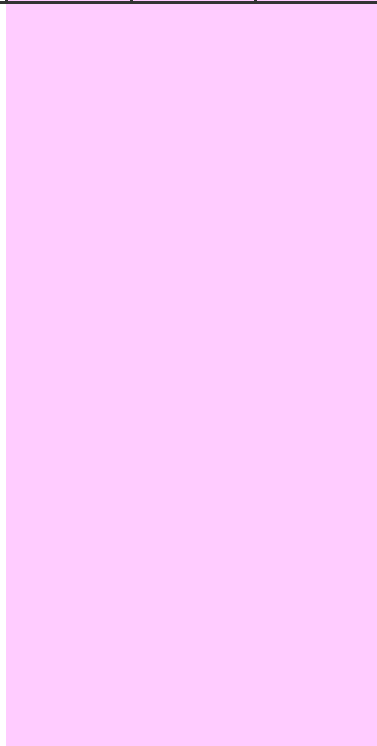





|    |   |    |   |    |    |    |   |   |
|----|---|----|---|----|----|----|---|---|
|    |   |    |   | 2  | 3  | 2  | 1 | 是 |
| 10 | 0 | 9  | 5 |    |    |    |   | 是 |
|    |   |    |   | 9  | 11 | 9  | 3 | 是 |
|    |   |    |   | 5  | 5  | 5  | 0 | 否 |
| 16 | 0 | 8  | 3 |    |    |    |   | 是 |
| 11 | 0 | 11 | 6 |    |    |    |   | 否 |
| 4  | 0 | 1  | 1 |    |    |    |   | 是 |
| 14 | 0 | 9  | 7 |    |    |    |   | 否 |
| 2  | 0 | 2  | 0 |    |    |    |   | 是 |
| 6  | 0 | 6  | 3 |    |    |    |   | 否 |
|    |   |    |   | 10 | 13 | 10 | 5 | 是 |
| 12 | 0 | 0  | 0 |    |    |    |   | 是 |
| 7  | 0 | 7  | 2 |    |    |    |   | 否 |
| 10 | 0 | 10 | 4 |    |    |    |   | 是 |
| 9  | 0 | 6  | 2 |    |    |    |   | 是 |
| 4  | 0 | 4  | 2 |    |    |    |   | 是 |
| 5  | 0 | 5  | 2 |    |    |    |   | 是 |
|    |   |    |   | 12 | 14 | 11 | 4 | 是 |
| 10 | 0 | 4  | 1 |    |    |    |   | 是 |
| 2  | 0 | 2  | 2 |    |    |    |   | 是 |
| 10 | 0 | 9  | 3 |    |    |    |   | 是 |
| 10 | 0 | 5  | 3 |    |    |    |   | 否 |
| 10 | 0 | 10 | 8 |    |    |    |   | 是 |
| 12 | 0 | 0  | 0 |    |    |    |   | 是 |
| 9  | 0 | 9  | 5 |    |    |    |   | 是 |
|    |   |    |   | 7  | 7  | 7  | 1 | 否 |
| 3  | 0 | 0  | 0 |    |    |    |   | 否 |
|    |   |    |   | 20 | 25 | 20 | 3 | 是 |
|    |   |    |   | 5  | 6  | 5  | 3 | 否 |
| 3  | 0 | 3  | 2 |    |    |    |   | 否 |
| 5  | 0 | 5  | 2 |    |    |    |   | 否 |
|    |   |    |   | 16 | 19 | 16 | 9 | 是 |
| 0  | 0 | 0  | 0 |    |    |    |   | 否 |
| 14 | 0 | 14 | 8 |    |    |    |   | 是 |
| 14 | 0 | 12 | 1 |    |    |    |   | 是 |
|    |   |    |   |    |    |    |   | 是 |
| 7  | 0 | 7  | 5 |    |    |    |   | 否 |
| 4  | 0 | 0  | 0 |    |    |    |   | 是 |
|    |   |    |   | 0  | 1  | 0  | 0 | 是 |
| 3  | 0 | 0  | 0 |    |    |    |   | 是 |
| 13 | 0 | 13 | 7 |    |    |    |   | 是 |
| 9  | 0 | 9  | 4 |    |    |    |   | 是 |
|    |   |    |   | 10 | 13 | 4  | 2 | 否 |
| 15 | 0 | 12 | 3 |    |    |    |   | 是 |
| 5  | 0 | 4  | 1 |    |    |    |   | 是 |
|    |   |    |   | 12 | 16 | 12 | 9 | 是 |
| 6  | 0 | 1  | 0 |    |    |    |   | 是 |
| 15 | 0 | 13 | 9 |    |    |    |   | 否 |
| 7  | 8 | 6  | 3 |    |    |    |   | 是 |
|    |   |    |   | 10 | 12 | 10 | 3 | 否 |

|    |    |    |    |    |    |    |   |   |
|----|----|----|----|----|----|----|---|---|
|    |    |    |    | 7  | 10 | 7  | 2 | 是 |
| 3  | 3  | 3  | 3  |    |    |    |   | 否 |
| 10 | 11 | 10 | 7  |    |    |    |   | 是 |
| 10 | 0  | 4  | 0  |    |    |    |   | 是 |
| 2  | 0  | 0  | 0  |    |    |    |   | 否 |
| 21 | 0  | 21 | 11 |    |    |    |   | 否 |
| 7  | 0  | 5  | 4  |    |    |    |   | 否 |
| 19 | 0  | 19 | 5  |    |    |    |   | 否 |
| 13 | 0  | 11 | 9  |    |    |    |   | 是 |
| 14 | 0  | 14 | 10 |    |    |    |   | 否 |
| 5  | 0  | 1  | 1  |    |    |    |   | 否 |
| 10 | 0  | 9  | 2  |    |    |    |   | 否 |
|    |    |    |    | 7  | 9  | 5  | 4 | 是 |
| 13 | 0  | 10 | 6  |    |    |    |   | 否 |
|    |    |    |    |    |    |    |   | 否 |
| 9  |    | 9  | 5  |    |    |    |   | 是 |
| 7  | 0  | 7  | 4  |    |    |    |   | 是 |
| 4  | 0  | 4  | 4  |    |    |    |   | 否 |
| 9  | 0  | 9  | 2  |    |    |    |   | 否 |
| 0  | 0  | 0  | 0  |    |    |    |   | 是 |
| 17 | 0  | 17 | 11 |    |    |    |   | 否 |
| 6  | 0  | 2  | 2  |    |    |    |   | 是 |
| 6  | 0  | 6  | 3  |    |    |    |   | 否 |
| 11 | 0  | 11 | 6  |    |    |    |   | 是 |
| 8  | 0  | 8  | 5  |    |    |    |   | 是 |
| 18 | 0  | 15 | 5  |    |    |    |   | 否 |
| 14 | 0  | 0  | 0  |    |    |    |   | 是 |
|    |    |    |    | 9  | 11 | 9  | 2 | 否 |
| 16 |    | 12 | 2  |    |    |    |   | 是 |
| 10 | 0  | 10 | 8  |    |    |    |   | 否 |
|    |    |    |    | 10 | 12 | 10 | 4 | 是 |
| 10 |    | 10 | 5  |    |    |    |   | 否 |
|    |    |    |    | 5  | 7  | 5  | 1 | 是 |
|    |    |    |    | 9  | 11 | 8  | 1 | 否 |
|    |    |    |    | 11 | 14 | 11 | 8 | 是 |
| 11 | 0  | 11 | 3  |    |    |    |   | 否 |
| 12 | 0  | 12 | 4  |    |    |    |   | 否 |
| 18 | 18 | 17 | 6  |    |    |    |   | 是 |
| 3  | 5  | 1  | 0  |    |    |    |   | 否 |
| 2  | 0  | 2  | 1  |    |    |    |   | 否 |
| 4  | 5  | 4  | 4  |    |    |    |   | 是 |
| 9  | 9  | 8  | 7  |    |    |    |   | 否 |
|    |    |    |    | 6  | 7  | 6  | 5 | 是 |
| 10 | 0  | 0  | 0  |    |    |    |   | 否 |
| 8  | 0  | 0  | 0  |    |    |    |   | 是 |
| 4  | 2  | 2  | 2  |    |    |    |   | 否 |
| 11 | 0  | 0  | 0  |    |    |    |   | 是 |
| 6  | 7  | 6  | 5  |    |    |    |   | 否 |
| 12 | 0  | 12 | 9  |    |    |    |   | 否 |
| 5  | 7  | 5  | 5  |    |    |    |   | 是 |

|    |    |    |    |    |    |    |   |   |
|----|----|----|----|----|----|----|---|---|
|    |    |    |    | 12 | 16 | 12 | 0 | 否 |
| 9  | 1  | 0  | 0  |    |    |    |   | 否 |
| 4  | 7  | 4  | 2  |    |    |    |   | 是 |
| 12 | 12 | 12 | 4  |    |    |    |   | 否 |
| 14 | 14 | 14 | 8  |    |    |    |   | 是 |
|    |    |    |    | 10 | 15 | 10 | 5 | 否 |
| 9  | 10 | 9  | 5  |    |    |    |   | 是 |
| 10 | 0  | 0  | 0  |    |    |    |   | 否 |
|    |    |    |    | 7  | 10 | 7  | 0 | 是 |
|    |    |    |    | 7  | 11 | 6  | 2 | 否 |
|    |    |    |    | 7  | 10 | 7  | 2 | 否 |
|    |    |    |    | 17 | 20 | 17 | 4 | 是 |
| 9  | 9  | 9  | 8  |    |    |    |   | 是 |
| 11 | 12 | 9  | 5  |    |    |    |   | 否 |
| 8  |    | 8  | 6  |    |    |    |   | 是 |
| 12 | 0  | 0  | 0  |    |    |    |   | 否 |
|    |    |    |    |    |    |    |   | 是 |
|    |    |    |    | 8  | 9  | 8  | 4 | 否 |
| 9  | 9  | 9  | 7  |    |    |    |   | 否 |
| 8  | 13 | 8  | 7  |    |    |    |   | 是 |
| 5  | 5  | 5  | 4  |    |    |    |   | 否 |
| 8  | 8  | 8  | 5  |    |    |    |   | 是 |
|    |    |    |    | 22 | 26 | 21 | 8 | 否 |
|    |    |    |    | 10 | 12 | 10 | 1 | 否 |
| 4  | 5  | 4  | 2  |    |    |    |   | 是 |
|    |    |    |    | 15 | 16 | 15 | 5 | 否 |
| 12 | 12 | 11 | 8  |    |    |    |   | 否 |
| 18 | 19 | 17 | 10 |    |    |    |   | 是 |
| 7  | 8  | 6  | 1  |    |    |    |   | 否 |
| 8  | 2  | 0  | 0  |    |    |    |   | 是 |
| 3  | 4  | 3  | 1  |    |    |    |   | 否 |
| 9  | 10 | 9  | 6  |    |    |    |   | 否 |
|    |    |    |    | 10 | 14 | 10 | 3 | 否 |
| 10 | 1  | 1  | 0  |    |    |    |   | 是 |
| 7  | 7  | 7  | 2  |    |    |    |   | 否 |
|    |    |    |    | 7  | 12 | 7  | 3 | 是 |
| 4  | 4  | 4  | 2  |    |    |    |   | 否 |
| 6  | 6  | 6  | 3  |    |    |    |   | 否 |
| 4  | 4  | 4  | 1  |    |    |    |   | 是 |
| 8  | 9  | 8  | 6  |    |    |    |   | 否 |
| 5  | 6  | 5  | 3  |    |    |    |   | 否 |
| 7  | 8  | 7  | 7  |    |    |    |   | 是 |
| 6  | 6  | 6  | 6  |    |    |    |   | 否 |
| 7  | 8  | 7  | 3  |    |    |    |   | 是 |
| 23 | 19 | 15 | 6  |    |    |    |   | 否 |
|    |    |    |    | 5  | 7  | 5  | 3 | 否 |
| 14 | 14 | 14 | 8  |    |    |    |   | 是 |
| 5  | 1  | 1  | 1  |    |    |    |   | 否 |
| 9  | 8  | 6  | 4  |    |    |    |   | 是 |
| 4  | 0  | 0  | 0  |    |    |    |   | 否 |

|    |    |    |    |    |    |    |   |   |
|----|----|----|----|----|----|----|---|---|
| 7  | 8  | 7  | 4  |    |    |    |   | 否 |
| 23 | 23 | 23 | 6  |    |    |    |   | 是 |
|    |    |    |    | 6  | 8  | 6  | 2 | 否 |
|    |    |    |    | 9  | 8  | 8  | 6 | 否 |
| 3  |    | 3  | 2  |    |    |    |   | 是 |
| 5  | 6  | 5  | 4  |    |    |    |   | 否 |
| 13 | 13 | 13 | 6  |    |    |    |   | 是 |
|    |    |    |    | 10 | 12 | 10 | 5 | 否 |
|    |    |    |    |    |    |    |   | 否 |
| 3  | 3  | 3  | 1  |    |    |    |   | 是 |
| 6  | 9  | 6  | 2  |    |    |    |   | 否 |
|    |    |    |    | 2  | 2  | 1  | 1 | 是 |
| 7  | 8  | 7  | 7  |    |    |    |   | 是 |
| 5  | 5  | 5  | 3  |    |    |    |   | 是 |
| 17 | 19 | 17 | 8  |    |    |    |   | 否 |
| 15 | 15 | 15 | 8  |    |    |    |   | 否 |
| 6  | 7  | 6  | 2  |    |    |    |   | 否 |
| 1  | 1  | 1  | 1  |    |    |    |   | 否 |
| 8  | 8  | 8  | 5  |    |    |    |   | 是 |
| 10 | 11 | 10 | 1  |    |    |    |   | 否 |
| 6  | 8  | 5  | 3  |    |    |    |   | 是 |
|    |    |    |    | 13 | 15 | 11 | 8 | 否 |
| 6  | 6  | 6  | 3  |    |    |    |   | 否 |
| 10 | 7  | 5  | 2  |    |    |    |   | 是 |
| 4  | 6  | 4  | 3  |    |    |    |   | 否 |
| 8  | 0  | 0  | 0  |    |    |    |   | 否 |
|    |    |    |    | 15 | 18 | 15 | 9 | 是 |
| 3  | 1  | 1  | 1  |    |    |    |   | 是 |
| 12 | 13 | 11 | 6  |    |    |    |   | 是 |
| 6  | 9  | 6  | 5  |    |    |    |   | 是 |
| 4  | 10 | 4  | 3  |    |    |    |   | 否 |
|    |    |    |    | 10 | 12 | 10 | 4 | 否 |
| 10 | 12 | 6  | 5  |    |    |    |   | 是 |
| 5  | 6  | 5  | 4  |    |    |    |   | 否 |
| 6  | 6  | 6  | 5  |    |    |    |   | 是 |
| 0  | 1  | 0  | 0  |    |    |    |   | 否 |
|    |    |    |    |    |    |    |   | 是 |
|    |    |    |    | 20 | 24 | 20 | 6 | 是 |
| 2  | 2  | 2  | 2  |    |    |    |   | 否 |
| 19 | 22 | 11 | 5  |    |    |    |   | 是 |
| 11 | 13 | 11 | 6  |    |    |    |   | 是 |
| 2  | 2  | 2  | 2  |    |    |    |   | 否 |
|    |    |    |    | 6  | 7  | 6  | 3 | 是 |
| 21 | 21 | 21 | 10 |    |    |    |   | 是 |
|    |    |    |    | 8  | 8  | 8  | 5 | 是 |
|    |    |    |    | 8  | 9  | 8  | 7 | 否 |
| 13 | 19 | 11 | 6  |    |    |    |   | 是 |
|    |    |    |    | 7  | 9  | 7  | 5 | 否 |
|    |    |    |    | 4  | 5  | 4  | 1 | 否 |
| 12 | 12 | 11 | 5  |    |    |    |   | 否 |

|    |    |    |    |    |    |    |    |   |
|----|----|----|----|----|----|----|----|---|
| 3  | 5  | 3  | 2  |    |    |    |    | 是 |
| 17 | 23 | 15 | 1  |    |    |    |    | 是 |
| 8  | 8  | 7  | 4  |    |    |    |    | 否 |
| 8  | 7  | 6  | 4  |    |    |    |    | 否 |
|    |    |    |    |    |    |    |    | 否 |
| 0  | 0  | 0  | 0  |    |    |    |    | 是 |
| 5  | 4  | 2  | 2  |    |    |    |    | 是 |
| 10 | 10 | 10 | 7  |    |    |    |    | 是 |
| 7  | 10 | 7  | 2  |    |    |    |    | 是 |
| 5  | 3  | 2  | 0  |    |    |    |    | 是 |
| 5  | 4  | 4  | 4  |    |    |    |    | 否 |
| 16 | 13 | 10 | 2  |    |    |    |    | 是 |
| 7  | 7  | 5  | 0  |    |    |    |    | 否 |
| 5  | 5  | 5  | 4  |    |    |    |    | 否 |
|    |    |    |    | 5  | 8  | 5  | 3  | 是 |
|    |    |    |    | 5  | 6  | 5  | 2  | 否 |
| 9  | 11 | 9  | 4  |    |    |    |    | 否 |
|    |    |    |    |    |    |    |    | 是 |
|    |    |    |    | 3  | 5  | 2  | 2  | 否 |
| 6  | 8  | 6  | 4  |    |    |    |    | 否 |
| 2  | 3  | 2  | 2  |    |    |    |    | 是 |
| 18 | 21 | 18 | 7  |    |    |    |    | 否 |
|    |    |    |    | 14 | 17 | 14 | 8  | 是 |
| 12 | 15 | 10 | 7  |    |    |    |    | 否 |
| 4  | 6  | 4  | 2  |    |    |    |    | 否 |
|    |    |    |    | 27 | 27 | 27 | 10 | 是 |
| 7  |    | 6  | 1  |    |    |    |    | 否 |
| 7  | 8  | 6  | 6  |    |    |    |    | 否 |
| 16 | 19 | 16 | 11 |    |    |    |    | 是 |
|    |    |    |    | 6  | 6  | 6  | 4  | 否 |
| 11 | 12 | 11 | 8  |    |    |    |    | 是 |
| 8  | 8  | 8  | 4  |    |    |    |    | 否 |
|    |    |    |    |    |    |    |    | 是 |
| 7  | 0  | 0  | 0  |    |    |    |    | 是 |
|    |    |    |    | 17 | 22 | 17 | 11 | 否 |
|    |    |    |    | 10 | 13 | 10 | 4  | 是 |
|    |    |    |    | 1  | 4  | 1  | 1  | 否 |
| 10 | 0  | 0  | 0  |    |    |    |    | 否 |
|    |    |    |    | 19 | 23 | 19 | 11 | 是 |
| 10 | 10 | 10 | 6  |    |    |    |    | 否 |
|    |    |    |    |    |    |    |    | 否 |
| 9  | 10 | 9  | 7  |    |    |    |    | 是 |
| 8  | 11 | 6  | 0  |    |    |    |    | 是 |
| 15 | 15 | 14 | 10 |    |    |    |    | 是 |
|    |    |    |    | 9  | 10 | 9  | 2  | 否 |
| 10 | 10 | 10 | 7  |    |    |    |    | 否 |
| 5  | 5  | 5  | 4  |    |    |    |    | 否 |
| 25 | 25 | 25 | 10 |    |    |    |    | 否 |
| 4  | 6  | 4  | 0  |    |    |    |    | 是 |
|    |    |    |    | 10 | 14 | 6  | 2  | 是 |

|    |    |    |    |    |    |    |    |   |
|----|----|----|----|----|----|----|----|---|
| 7  | 0  | 0  | 0  |    |    |    |    | 否 |
| 7  | 3  | 3  | 0  |    |    |    |    | 否 |
| 11 | 12 | 11 | 5  |    |    |    |    | 是 |
| 25 | 27 | 22 | 2  |    |    |    |    | 否 |
|    |    |    |    | 8  | 14 | 8  | 1  | 否 |
| 16 | 16 | 16 | 2  |    |    |    |    | 是 |
| 0  | 0  | 0  | 0  |    |    |    |    | 是 |
| 16 | 18 | 16 | 11 |    |    |    |    | 是 |
| 8  | 9  | 8  | 6  |    |    |    |    | 否 |
| 5  | 5  | 5  | 2  |    |    |    |    | 否 |
| 15 | 16 | 15 | 10 |    |    |    |    | 是 |
| 6  | 6  | 6  | 2  |    |    |    |    | 是 |
| 11 | 22 | 11 | 4  |    |    |    |    | 否 |
| 8  | 3  | 2  | 1  |    |    |    |    | 是 |
| 5  | 6  | 5  | 4  |    |    |    |    | 否 |
|    |    |    |    | 16 | 19 | 16 | 4  | 是 |
|    |    |    |    | 6  | 8  | 6  | 4  | 是 |
|    |    |    |    | 7  | 8  | 7  | 2  | 是 |
|    |    |    |    | 5  | 6  | 5  | 1  | 否 |
| 4  | 4  | 4  | 3  |    |    |    |    | 是 |
| 9  | 10 | 8  | 6  |    |    |    |    | 否 |
| 15 | 0  | 0  | 0  |    |    |    |    | 否 |
|    |    |    |    | 9  | 12 | 8  | 6  | 否 |
| 8  | 9  | 8  | 6  |    |    |    |    | 是 |
| 7  | 7  | 7  | 6  |    |    |    |    | 否 |
|    |    |    |    | 3  | 8  | 1  | 1  | 是 |
|    |    |    |    | 1  | 3  | 1  | 1  | 否 |
|    |    |    |    | 20 | 23 | 20 | 10 | 否 |
|    |    |    |    | 12 | 14 | 12 | 2  | 否 |
| 15 | 15 | 15 | 6  |    |    |    |    | 是 |
| 12 | 14 | 12 | 8  |    |    |    |    | 否 |
| 1  | 1  | 1  | 0  |    |    |    |    | 是 |
| 12 | 14 | 12 | 10 |    |    |    |    | 否 |
| 9  | 10 | 8  | 4  |    |    |    |    | 是 |
|    |    |    |    | 4  | 4  | 4  | 2  | 否 |
|    |    |    |    | 8  | 10 | 8  | 4  | 否 |
|    |    |    |    | 10 | 15 | 10 | 6  | 是 |
| 7  | 9  | 7  | 2  |    |    |    |    | 是 |
| 6  | 0  | 0  | 0  |    |    |    |    | 否 |
| 5  | 7  | 5  | 2  |    |    |    |    | 是 |
| 12 | 14 | 10 | 2  |    |    |    |    | 否 |
| 14 | 10 | 10 | 5  |    |    |    |    | 是 |
|    |    |    |    | 10 | 12 | 9  | 4  | 是 |
|    |    |    |    | 4  | 4  | 4  | 3  | 否 |
| 20 | 22 | 19 | 4  |    |    |    |    | 是 |
| 5  | 6  | 5  | 1  |    |    |    |    | 否 |
| 12 | 13 | 12 | 8  |    |    |    |    | 否 |
| 14 | 14 | 13 | 6  |    |    |    |    | 否 |
|    |    |    |    | 4  | 6  | 4  | 2  | 是 |
| 11 | 11 | 10 | 6  |    |    |    |    | 否 |





|    |    |    |    |    |    |    |   |   |
|----|----|----|----|----|----|----|---|---|
| 2  | 2  | 2  | 2  |    |    |    |   | 否 |
|    |    |    |    | 4  | 6  | 4  | 1 | 否 |
| 5  | 5  | 5  | 4  |    |    |    |   | 是 |
|    |    |    |    | 13 | 14 | 13 | 2 | 否 |
|    |    |    |    | 10 | 11 | 9  | 4 | 否 |
| 14 | 11 | 7  | 4  |    |    |    |   | 是 |
| 6  | 6  | 6  | 2  |    |    |    |   | 否 |
|    |    |    |    | 3  | 3  | 3  | 0 | 是 |
| 8  | 9  | 8  | 2  |    |    |    |   | 是 |
|    |    |    |    | 6  | 8  | 6  | 1 | 否 |
|    |    |    |    | 4  | 4  | 4  | 1 | 否 |
| 0  | 0  | 0  | 0  |    |    |    |   | 是 |
| 7  | 7  | 7  | 6  |    |    |    |   | 否 |
| 7  | 9  | 7  | 2  |    |    |    |   | 是 |
| 12 | 9  | 7  | 6  |    |    |    |   | 是 |
| 15 | 16 | 15 | 10 |    |    |    |   | 是 |
| 7  | 7  | 7  | 4  |    |    |    |   | 是 |
| 12 | 12 | 11 | 5  |    |    |    |   | 否 |
| 9  | 9  | 9  | 6  |    |    |    |   | 否 |
| 9  | 11 | 8  | 4  |    |    |    |   | 是 |
| 10 | 7  | 5  | 2  |    |    |    |   | 否 |
|    |    |    |    | 8  | 10 | 8  | 4 | 否 |
| 10 | 10 | 10 | 6  |    |    |    |   | 是 |
| 15 | 15 | 14 | 8  |    |    |    |   | 否 |
|    |    |    |    | 13 | 15 | 13 | 4 | 是 |
|    |    |    |    | 8  | 10 | 8  | 2 | 是 |
| 2  |    | 2  | 1  |    |    |    |   | 是 |
| 14 | 15 | 14 | 10 |    |    |    |   | 否 |
|    |    |    |    | 6  | 6  | 6  | 4 | 是 |
| 7  | 7  | 7  | 7  |    |    |    |   | 否 |
|    |    |    |    | 10 | 12 | 10 | 6 | 否 |
|    |    |    |    | 5  | 8  | 4  | 1 | 是 |
| 19 | 21 | 19 | 8  |    |    |    |   | 否 |
| 3  | 2  | 2  | 2  |    |    |    |   | 否 |
| 1  | 1  | 1  | 0  |    |    |    |   | 是 |
| 12 | 12 | 11 | 6  |    |    |    |   | 否 |
| 13 | 13 | 13 | 8  |    |    |    |   | 是 |
| 16 | 24 | 7  | 1  |    |    |    |   | 是 |
| 11 | 14 | 11 | 0  |    |    |    |   | 否 |
| 22 | 27 | 22 | 10 |    |    |    |   | 是 |
| 12 | 12 | 11 | 6  |    |    |    |   | 否 |
| 4  | 4  | 4  | 2  |    |    |    |   | 是 |
| 2  | 4  | 1  | 1  |    |    |    |   | 否 |
| 13 | 14 | 13 | 6  |    |    |    |   | 是 |
| 9  | 11 | 9  | 4  |    |    |    |   | 是 |
| 1  | 0  | 0  | 0  |    |    |    |   | 否 |
|    |    |    |    | 3  | 3  | 1  | 1 | 是 |
| 2  | 2  | 2  | 1  |    |    |    |   | 是 |
|    |    |    |    | 15 | 17 | 15 | 8 | 是 |
| 7  | 7  | 6  | 3  |    |    |    |   | 否 |

|    |    |    |    |    |    |    |   |   |
|----|----|----|----|----|----|----|---|---|
| 4  |    | 4  | 2  |    |    |    |   | 是 |
| 4  | 4  | 4  | 4  |    |    |    |   | 否 |
| 4  | 5  | 3  | 0  |    |    |    |   | 是 |
| 6  | 8  | 5  | 4  |    |    |    |   | 是 |
| 5  | 4  | 4  | 4  |    |    |    |   | 否 |
| 12 | 13 | 12 | 4  |    |    |    |   | 是 |
| 2  | 4  | 2  | 2  |    |    |    |   | 否 |
| 4  | 4  | 4  | 4  |    |    |    |   | 是 |
| 8  | 4  | 2  | 2  |    |    |    |   | 否 |
|    |    |    |    | 3  | 5  | 2  | 2 | 是 |
| 4  | 5  | 4  | 2  |    |    |    |   | 是 |
|    |    |    |    | 10 | 18 | 10 | 2 | 是 |
| 6  | 7  | 6  | 4  |    |    |    |   | 否 |
|    |    |    |    | 8  | 9  | 8  | 1 | 否 |
| 10 | 9  | 6  | 4  |    |    |    |   | 是 |
| 28 | 32 | 28 | 10 |    |    |    |   | 是 |
| 17 | 18 | 17 | 10 |    |    |    |   | 否 |
| 12 | 14 | 12 | 6  |    |    |    |   | 是 |
| 6  | 7  | 5  | 4  |    |    |    |   | 否 |
|    |    |    |    | 9  | 11 | 9  | 4 | 是 |
| 15 | 17 | 14 | 8  |    |    |    |   | 否 |
| 2  | 2  | 1  | 1  |    |    |    |   | 否 |
| 9  | 11 | 7  | 4  |    |    |    |   | 是 |
| 6  | 6  | 5  | 1  |    |    |    |   | 否 |
| 18 | 21 | 18 | 10 |    |    |    |   | 否 |
| 15 | 19 | 12 | 2  |    |    |    |   | 是 |
| 3  | 6  | 3  | 2  |    |    |    |   | 否 |
| 9  | 14 | 9  | 4  |    |    |    |   | 是 |
| 6  | 6  | 6  | 1  |    |    |    |   | 是 |
|    |    |    |    | 7  | 8  | 7  | 2 | 是 |
| 12 | 13 | 8  | 6  |    |    |    |   | 是 |
| 12 | 0  | 0  | 0  |    |    |    |   | 是 |
| 11 | 9  | 8  | 6  |    |    |    |   | 否 |
| 3  | 1  | 1  | 1  |    |    |    |   | 否 |
| 5  | 5  | 5  | 2  |    |    |    |   | 是 |
| 3  | 3  | 2  | 0  |    |    |    |   | 是 |
| 7  | 8  | 7  | 4  |    |    |    |   | 否 |
| 12 | 13 | 12 | 6  |    |    |    |   | 否 |
|    |    |    |    | 5  | 7  | 5  | 2 | 是 |
| 8  | 7  | 1  | 1  |    |    |    |   | 否 |
| 7  | 7  | 6  | 4  |    |    |    |   | 是 |
| 8  | 14 | 8  | 6  |    |    |    |   | 是 |
| 12 |    | 12 | 6  |    |    |    |   | 是 |
|    |    |    |    | 5  | 6  | 4  | 2 | 否 |
| 28 | 32 | 28 | 10 |    |    |    |   | 否 |
| 9  | 9  | 9  | 6  |    |    |    |   | 是 |
| 10 | 10 | 8  | 4  |    |    |    |   | 否 |
| 14 | 16 | 12 | 8  |    |    |    |   | 是 |
| 6  | 7  | 6  | 2  |    |    |    |   | 是 |
| 10 | 5  | 8  | 6  |    |    |    |   | 否 |

|    |    |    |    |    |    |    |    |   |
|----|----|----|----|----|----|----|----|---|
| 5  | 8  | 5  | 2  |    |    |    |    | 是 |
| 6  | 8  | 6  | 4  |    |    |    |    | 否 |
| 3  | 3  | 3  | 2  |    |    |    |    | 否 |
| 12 | 11 | 6  | 4  |    |    |    |    | 是 |
|    |    |    |    | 18 | 23 | 17 | 6  | 是 |
| 5  | 5  | 5  | 2  |    |    |    |    | 是 |
| 8  | 8  | 8  | 6  |    |    |    |    | 否 |
| 17 | 17 | 14 | 6  |    |    |    |    | 是 |
| 6  | 6  | 6  | 6  |    |    |    |    | 是 |
| 4  | 5  | 4  | 2  |    |    |    |    | 是 |
| 6  | 8  | 5  | 4  |    |    |    |    | 否 |
| 8  | 8  | 7  | 2  |    |    |    |    | 是 |
| 25 | 26 | 23 | 10 |    |    |    |    | 否 |
| 4  | 4  | 3  | 3  |    |    |    |    | 是 |
|    |    |    |    | 8  | 9  | 8  | 2  | 否 |
| 9  | 9  | 8  | 4  |    |    |    |    | 是 |
| 6  | 7  | 5  | 2  |    |    |    |    | 是 |
| 13 | 13 | 10 | 2  |    |    |    |    | 否 |
| 9  | 11 | 9  | 6  |    |    |    |    | 否 |
|    |    |    |    | 17 | 17 | 17 | 8  | 是 |
| 13 | 18 | 13 | 10 |    |    |    |    | 否 |
| 12 | 12 | 12 | 10 |    |    |    |    | 是 |
|    |    |    |    | 20 | 23 | 14 | 10 | 是 |
| 7  | 7  | 7  | 2  |    |    |    |    | 否 |
| 14 | 9  | 6  | 1  |    |    |    |    | 是 |
|    |    |    |    | 6  | 8  | 6  | 1  | 否 |
| 2  | 3  | 2  | 2  |    |    |    |    | 是 |
| 8  | 4  | 3  | 3  |    |    |    |    | 否 |
| 17 | 18 | 16 | 10 |    |    |    |    | 否 |
| 15 | 12 | 11 | 8  |    |    |    |    | 是 |
| 17 | 16 | 6  | 6  |    |    |    |    | 否 |
| 17 | 21 | 17 | 10 |    |    |    |    | 否 |
| 15 | 5  | 2  | 2  |    |    |    |    | 是 |
| 8  | 9  | 8  | 1  |    |    |    |    | 否 |
| 6  | 6  | 6  | 6  |    |    |    |    | 是 |
| 13 | 13 | 13 | 9  |    |    |    |    | 是 |
| 9  | 9  | 9  | 8  |    |    |    |    | 否 |
| 6  | 6  | 6  | 6  |    |    |    |    | 否 |
|    |    |    |    | 10 | 12 | 10 | 2  | 是 |
| 10 | 8  | 8  | 6  |    |    |    |    | 否 |
| 11 | 11 | 11 | 2  |    |    |    |    | 否 |
| 16 | 16 | 16 | 6  |    |    |    |    | 是 |
| 5  | 6  | 6  | 2  |    |    |    |    | 否 |
| 4  | 5  | 4  | 4  |    |    |    |    | 否 |
| 18 | 18 | 18 | 6  |    |    |    |    | 否 |
| 6  | 8  | 7  | 2  |    |    |    |    | 是 |
| 4  | 5  | 4  | 3  |    |    |    |    | 否 |
| 15 | 16 | 16 | 8  |    |    |    |    | 否 |
| 3  | 3  | 2  | 2  |    |    |    |    | 是 |
| 2  | 3  | 2  | 2  |    |    |    |    | 是 |

|    |    |    |   |    |    |    |   |   |
|----|----|----|---|----|----|----|---|---|
|    |    |    |   | 18 | 22 | 18 | 8 | 否 |
| 8  | 8  | 8  | 6 |    |    |    |   | 是 |
| 5  | 12 | 5  | 2 |    |    |    |   | 否 |
|    |    |    |   | 9  | 10 | 9  | 1 | 否 |
| 11 | 15 | 11 | 4 |    |    |    |   | 否 |
| 7  | 7  | 6  | 6 |    |    |    |   | 否 |
| 11 | 12 | 11 | 8 |    |    |    |   | 是 |
| 3  | 3  | 3  | 3 |    |    |    |   | 是 |
|    |    |    |   | 12 | 18 | 10 | 4 | 否 |
| 10 | 12 | 10 | 3 |    |    |    |   | 否 |
| 6  | 7  | 5  | 2 |    |    |    |   | 是 |
| 6  | 7  | 6  | 1 |    |    |    |   | 否 |
|    |    |    |   |    |    |    |   | 是 |
| 0  | 5  | 0  | 0 |    |    |    |   | 是 |
| 5  | 7  | 5  | 3 |    |    |    |   | 否 |
|    |    |    |   | 6  | 9  | 3  | 2 | 是 |
| 10 | 13 | 10 | 5 |    |    |    |   | 否 |
| 1  |    | 1  | 0 |    |    |    |   | 否 |
| 16 | 16 | 14 | 6 |    |    |    |   | 是 |
| 10 | 13 | 10 | 6 |    |    |    |   | 是 |
| 10 | 10 | 10 | 8 |    |    |    |   | 是 |
| 4  | 5  | 4  | 4 |    |    |    |   | 否 |
| 9  | 9  | 6  | 3 |    |    |    |   | 否 |
| 8  | 7  | 7  | 4 |    |    |    |   | 是 |
| 29 | 34 | 29 | 8 |    |    |    |   | 是 |
| 10 | 10 | 7  | 4 |    |    |    |   | 否 |
| 9  | 10 | 9  | 3 |    |    |    |   | 是 |
| 14 | 10 | 3  | 2 |    |    |    |   | 是 |
|    |    |    |   | 5  | 8  | 5  | 5 | 否 |
| 5  | 5  | 5  | 4 |    |    |    |   | 是 |
|    |    |    |   | 15 | 18 | 15 | 6 | 是 |
|    |    |    |   | 18 | 24 | 14 | 6 | 否 |
| 1  | 1  | 1  | 1 |    |    |    |   | 是 |
| 0  | 1  | 0  | 0 |    |    |    |   | 是 |
| 11 | 11 | 11 | 6 |    |    |    |   | 否 |
| 8  | 10 | 7  | 4 |    |    |    |   | 否 |
|    |    |    |   | 6  | 7  | 6  | 2 | 是 |
| 10 | 12 | 9  | 4 |    |    |    |   | 否 |
|    |    |    |   | 4  | 4  | 4  | 2 | 否 |
| 14 | 14 | 14 | 6 |    |    |    |   | 是 |
| 12 | 14 | 10 | 8 |    |    |    |   | 否 |
| 8  | 7  | 6  | 2 |    |    |    |   | 是 |
| 10 | 3  | 3  | 1 |    |    |    |   | 否 |
| 8  | 8  | 8  | 4 |    |    |    |   | 否 |
| 6  | 11 | 5  | 2 |    |    |    |   | 是 |
| 2  | 3  | 2  | 1 |    |    |    |   | 是 |
|    |    |    |   | 3  | 3  | 3  | 2 | 否 |
| 14 | 16 | 12 | 3 |    |    |    |   | 是 |
| 36 | 37 | 36 | 0 |    |    |    |   | 否 |
| 11 | 14 | 11 | 8 |    |    |    |   | 是 |

|    |    |    |   |    |    |    |    |   |
|----|----|----|---|----|----|----|----|---|
| 9  | 9  | 8  | 4 |    |    |    |    | 否 |
|    |    |    |   | 10 | 12 | 10 | 6  | 是 |
|    |    |    |   | 5  | 7  | 2  | 1  | 否 |
| 9  | 9  | 8  | 3 |    |    |    |    | 是 |
| 4  | 4  | 4  | 2 |    |    |    |    | 否 |
| 13 | 18 | 12 | 6 |    |    |    |    | 否 |
| 10 | 10 | 8  | 6 |    |    |    |    | 是 |
| 11 | 12 | 10 | 5 |    |    |    |    | 否 |
| 8  | 8  | 8  | 5 |    |    |    |    | 是 |
| 5  | 5  | 5  | 1 |    |    |    |    | 否 |
| 8  | 8  | 8  | 4 |    |    |    |    | 是 |
|    |    |    |   | 8  | 10 | 8  | 5  | 否 |
|    |    |    |   | 12 | 16 | 6  | 0  | 否 |
| 2  | 3  | 2  | 0 |    |    |    |    | 是 |
|    |    |    |   | 13 | 13 | 13 | 4  | 是 |
| 11 | 14 | 11 | 4 |    |    |    |    | 否 |
| 9  | 9  | 9  | 3 |    |    |    |    | 否 |
| 9  | 9  | 9  | 8 |    |    |    |    | 是 |
| 0  | 0  | 0  | 0 |    |    |    |    | 否 |
| 5  | 7  | 5  | 2 |    |    |    |    | 否 |
| 0  | 0  | 0  | 0 |    |    |    |    | 是 |
| 6  | 7  | 6  | 4 |    |    |    |    | 是 |
| 4  | 6  | 4  | 4 |    |    |    |    | 否 |
| 18 | 20 | 17 | 9 |    |    |    |    | 否 |
|    |    |    |   | 7  | 9  | 5  | 0  | 是 |
| 3  | 6  | 3  | 0 |    |    |    |    | 否 |
| 9  | 9  | 9  | 8 |    |    |    |    | 是 |
| 16 | 16 | 6  | 0 |    |    |    |    | 否 |
|    |    |    |   | 3  | 5  | 3  | 2  | 是 |
| 3  | 3  | 3  | 2 |    |    |    |    | 是 |
| 12 | 9  | 5  | 2 |    |    |    |    | 否 |
| 3  | 5  | 2  | 1 |    |    |    |    | 否 |
| 14 | 5  | 3  | 2 |    |    |    |    | 是 |
|    |    |    |   | 15 | 21 | 15 | 8  | 否 |
|    |    |    |   | 4  | 5  | 3  | 2  | 否 |
| 10 | 3  | 3  | 3 |    |    |    |    | 是 |
| 9  | 8  | 7  | 4 |    |    |    |    | 是 |
| 18 | 20 | 18 | 8 |    |    |    |    | 否 |
| 9  | 9  | 9  | 6 |    |    |    |    | 否 |
| 6  | 6  | 6  | 6 |    |    |    |    | 是 |
| 19 | 18 | 17 | 4 |    |    |    |    | 否 |
| 9  | 9  | 9  | 6 |    |    |    |    | 否 |
|    |    |    |   | 29 | 36 | 28 | 10 | 是 |
|    |    |    |   | 4  | 4  | 4  | 1  | 是 |
| 24 | 27 | 24 | 8 |    |    |    |    | 否 |
|    |    |    |   | 8  | 9  | 8  | 1  | 否 |
| 6  | 6  | 6  | 4 |    |    |    |    | 是 |
|    |    |    |   | 9  | 10 | 9  | 5  | 否 |
| 12 | 17 | 12 | 9 |    |    |    |    | 否 |
| 7  | 7  | 7  | 6 |    |    |    |    | 是 |

|    |    |    |    |    |    |    |   |   |
|----|----|----|----|----|----|----|---|---|
|    |    |    |    | 6  | 6  | 6  | 2 | 是 |
| 10 | 12 | 7  | 2  |    |    |    |   | 否 |
| 9  | 11 | 5  | 5  |    |    |    |   | 否 |
| 16 | 14 | 14 | 8  |    |    |    |   | 是 |
| 11 | 12 | 10 | 10 |    |    |    |   | 否 |
| 17 | 18 | 17 | 10 |    |    |    |   | 否 |
| 11 | 10 | 9  | 7  |    |    |    |   | 是 |
|    |    |    |    | 17 | 19 | 17 | 4 | 是 |
| 24 | 24 | 22 | 14 |    |    |    |   | 否 |
| 10 | 10 | 10 | 8  |    |    |    |   | 否 |
| 4  | 4  | 4  | 4  |    |    |    |   | 是 |
| 7  | 11 | 7  | 6  |    |    |    |   | 否 |
| 9  | 8  | 7  | 2  |    |    |    |   | 否 |
| 16 | 17 | 14 | 10 |    |    |    |   | 否 |
| 9  | 9  | 9  | 2  |    |    |    |   | 是 |
|    |    |    |    | 9  | 16 | 9  | 8 | 是 |
| 10 | 9  | 8  | 3  |    |    |    |   | 否 |
|    |    |    |    |    |    |    |   | 否 |
| 7  | 10 | 5  | 4  |    |    |    |   | 是 |
| 8  | 9  | 8  | 7  |    |    |    |   | 是 |
| 11 | 11 | 7  | 5  |    |    |    |   | 否 |
|    |    |    |    | 16 | 18 | 16 | 2 | 是 |
| 2  | 2  | 2  | 2  |    |    |    |   | 是 |
|    |    |    |    | 4  | 6  | 4  | 2 | 否 |
|    |    |    |    | 5  | 9  | 3  | 2 | 否 |
| 8  | 4  | 3  | 0  |    |    |    |   | 是 |
| 7  | 8  | 7  | 4  |    |    |    |   | 否 |
| 7  | 8  | 7  | 2  |    |    |    |   | 是 |
| 16 | 16 | 16 | 10 |    |    |    |   | 否 |
| 9  | 9  | 9  | 8  |    |    |    |   | 是 |
|    |    |    |    | 4  | 4  | 4  | 2 | 是 |
| 17 | 17 | 17 | 10 |    |    |    |   | 否 |
| 5  | 5  | 5  | 0  |    |    |    |   | 否 |
|    |    |    |    | 3  | 4  | 3  | 3 | 是 |
| 1  | 1  | 1  | 0  |    |    |    |   | 否 |
|    |    |    |    | 7  | 7  | 6  | 4 | 否 |
| 10 | 10 | 10 | 5  |    |    |    |   | 是 |
| 1  | 1  | 1  | 1  |    |    |    |   | 是 |
| 24 | 38 | 23 | 8  |    |    |    |   | 否 |
| 3  | 4  | 3  | 0  |    |    |    |   | 否 |
| 1  |    | 1  | 1  |    |    |    |   | 是 |
| 10 | 3  | 1  | 1  |    |    |    |   | 否 |
| 1  | 2  | 1  | 1  |    |    |    |   | 否 |
| 15 | 17 | 15 | 10 |    |    |    |   | 否 |
| 11 | 10 | 7  | 5  |    |    |    |   | 是 |
| 9  | 11 | 9  | 0  |    |    |    |   | 是 |
| 18 | 21 | 17 | 8  |    |    |    |   | 否 |
| 11 | 11 | 11 | 6  |    |    |    |   | 否 |
| 6  | 6  | 6  | 4  |    |    |    |   | 是 |
| 2  | 3  | 2  | 2  |    |    |    |   | 否 |

|    |    |    |    |    |    |    |   |   |
|----|----|----|----|----|----|----|---|---|
| 11 | 15 | 11 | 10 |    |    |    |   | 否 |
| 7  | 8  | 7  | 5  |    |    |    |   | 是 |
|    |    |    |    | 5  | 8  | 5  | 2 | 是 |
| 4  | 4  | 4  | 4  |    |    |    |   | 否 |
| 10 | 3  | 3  | 0  |    |    |    |   | 否 |
| 19 | 20 | 18 | 10 |    |    |    |   | 是 |
| 14 | 16 | 14 | 10 |    |    |    |   | 否 |
|    |    |    |    | 15 | 29 | 15 | 8 | 否 |
| 9  | 9  | 9  | 4  |    |    |    |   | 是 |
| 8  | 6  | 4  | 3  |    |    |    |   | 是 |
| 11 | 13 | 11 | 6  |    |    |    |   | 否 |
| 3  | 5  | 3  | 3  |    |    |    |   | 否 |
|    |    |    |    | 7  | 9  | 7  | 2 | 是 |
| 8  | 8  | 8  | 4  |    |    |    |   | 否 |
| 6  | 7  | 6  | 4  |    |    |    |   | 否 |
| 2  | 7  | 2  | 3  |    |    |    |   | 是 |
| 9  | 10 | 9  | 6  |    |    |    |   | 是 |
| 14 | 15 | 14 | 0  |    |    |    |   | 否 |
| 4  | 9  | 4  | 1  |    |    |    |   | 否 |
|    |    |    |    | 13 | 13 | 13 | 0 | 是 |
|    |    |    |    | 10 | 14 | 10 | 4 | 否 |
| 7  | 6  | 2  | 0  |    |    |    |   | 否 |
|    |    |    |    | 5  | 8  | 5  | 2 | 是 |
| 7  | 8  | 7  | 4  |    |    |    |   | 是 |
| 11 | 11 | 11 | 5  |    |    |    |   | 否 |
| 15 | 18 | 15 | 6  |    |    |    |   | 否 |
| 3  | 4  | 3  | 1  |    |    |    |   | 是 |
| 11 | 11 | 11 | 4  |    |    |    |   | 否 |
| 9  | 13 | 9  | 3  |    |    |    |   | 否 |
| 4  | 5  | 4  | 1  |    |    |    |   | 是 |
|    |    |    |    | 2  | 4  | 2  | 1 | 是 |
| 8  | 9  | 8  | 6  |    |    |    |   | 否 |
| 7  | 7  | 7  | 4  |    |    |    |   | 否 |
| 4  | 7  | 4  | 2  |    |    |    |   | 是 |
| 3  | 4  | 3  | 2  |    |    |    |   | 否 |
|    |    |    |    | 8  | 10 | 8  | 1 | 否 |
| 5  | 7  | 5  | 2  |    |    |    |   | 是 |
| 7  | 9  | 7  | 2  |    |    |    |   | 是 |
| 7  | 9  | 6  | 4  |    |    |    |   | 是 |
| 30 | 37 | 28 | 3  |    |    |    |   | 否 |
| 3  | 3  | 3  | 2  |    |    |    |   | 否 |
|    |    |    |    | 15 | 18 | 15 | 8 | 是 |
| 15 | 17 | 15 | 10 |    |    |    |   | 否 |
| 9  | 18 | 9  | 6  |    |    |    |   | 是 |
| 7  | 8  | 7  | 2  |    |    |    |   | 是 |
| 8  | 9  | 8  | 2  |    |    |    |   | 是 |
| 21 | 21 | 21 | 10 |    |    |    |   | 是 |
| 6  | 6  | 6  | 2  |    |    |    |   | 否 |
| 3  | 5  | 3  | 2  |    |    |    |   | 否 |
| 8  | 8  | 8  | 6  |    |    |    |   | 是 |

|    |    |    |    |    |    |    |   |   |
|----|----|----|----|----|----|----|---|---|
|    |    |    |    | 8  | 6  | 8  | 4 | 否 |
| 8  | 6  | 5  | 2  |    |    |    |   | 是 |
| 14 | 14 | 14 | 8  |    |    |    |   | 否 |
| 2  | 2  | 2  | 2  |    |    |    |   | 是 |
| 4  | 5  | 4  | 3  |    |    |    |   | 是 |
| 4  |    | 4  | 0  |    |    |    |   | 否 |
| 10 | 10 | 9  | 3  |    |    |    |   | 是 |
|    |    |    |    | 36 | 39 | 36 | 4 | 否 |
| 5  | 5  | 5  | 2  |    |    |    |   | 是 |
| 8  | 8  | 8  | 3  |    |    |    |   | 否 |
| 4  | 6  | 4  | 4  |    |    |    |   | 是 |
|    |    |    |    | 10 | 10 | 10 | 1 | 是 |
| 15 | 15 | 15 | 10 |    |    |    |   | 否 |
|    |    |    |    | 16 | 19 | 14 | 4 | 否 |
|    |    |    |    | 12 | 15 | 11 | 6 | 是 |
| 13 | 14 | 12 | 6  |    |    |    |   | 是 |
| 4  | 4  | 4  | 3  |    |    |    |   | 否 |
|    |    |    |    |    |    |    |   | 否 |
|    |    |    |    | 11 | 13 | 11 | 6 | 是 |
| 14 | 12 | 10 | 1  |    |    |    |   | 否 |
| 0  | 1  | 0  | 0  |    |    |    |   | 否 |
|    |    |    |    |    |    |    |   | 是 |
|    |    |    |    | 5  | 6  | 5  | 2 | 是 |
| 5  | 2  | 0  | 0  |    |    |    |   | 是 |
|    |    |    |    | 2  | 5  | 2  | 2 | 否 |
| 11 |    | 10 | 3  |    |    |    |   | 否 |
| 6  | 6  | 6  | 6  |    |    |    |   | 否 |



| 降调节费用 | FSH费用 | HMG费用 | 总费用   | Gn启动前降调节天数 |
|-------|-------|-------|-------|------------|
| 1310  | 4667  | 140   | 6117  | 16         |
| 1310  | 5133  | 512   | 6955  | 14         |
| 2323  | 2975  | 140   | 5438  | 16         |
| 2502  | 4667  | 465   | 7633  | 15         |
| 1668  | 2567  | 1023  | 5257  | 16         |
| 1430  | 2800  | 558   | 4788  | 16         |
| 1727  | 4025  | 488   | 6241  | 16         |
| 1430  | 2450  | 93    | 3973  | 15         |
| 1310  | 2450  | 256   | 4016  | 15         |
| 1549  | 3150  | 767   | 5466  | 14         |
| 1549  | 4200  | 140   | 5888  | 14         |
| 1573  | 4667  | 628   | 6867  | 15         |
| 1430  | 2100  | 465   | 3995  | 14         |
| 1644  | 2625  | 1186  | 5455  | 15         |
| 1358  | 1633  | 209   | 3201  | 16         |
| 1537  | 2217  | 140   | 3893  | 15         |
| 1132  | 3150  | 233   | 4514  | 16         |
| 1406  | 3500  | 302   | 5208  | 16         |
| 1358  | 3267  | 674   | 5299  | 15         |
| 1358  | 2800  | 233   | 4391  | 15         |
| 1430  | 3500  | 186   | 5116  | 15         |
| 1430  | 3267  | 1023  | 5719  | 14         |
| 1954  | 2450  | 93    | 4497  | 15         |
| 1418  | 2450  | 140   | 4007  | 16         |
| 1310  | 5367  | 302   | 6979  | 15         |
| 1430  | 2800  | 1139  | 5369  | 15         |
| 1525  | 3967  | 279   | 5771  | 15         |
| 1525  | 1400  | 314   | 3239  | 15         |
| 1418  | 1400  | 395   | 3213  | 15         |
| 1370  | 3733  | 279   | 5382  | 15         |
| 1668  | 5133  | 256   | 7057  | 16         |
| 1430  | 4667  | 465   | 6561  | 15         |
| 1489  | 4083  | 256   | 5828  | 14         |
| 1525  | 1983  | 116   | 3624  | 14         |
| 1418  | 1925  | 256   | 3598  | 14         |
| 1310  | 2450  | 419   | 4179  | 16         |
| 1489  | 3733  | 721   | 5943  | 15         |
| 1430  | 2800  | 47    | 4276  | 14         |
| 1430  | 1867  | 395   | 3691  | 14         |
| 1358  | 1633  | 419   | 3410  | 15         |
| 1310  | 3267  | 186   | 4763  | 15         |
| 1430  | 4200  | 256   | 5885  | 15         |
| 1430  | 2800  | 326   | 4555  | 16         |
| 1418  | 2800  | 419   | 4636  | 15         |
| 1906  | 2100  | 93    | 4099  | 14         |
| 1489  | 3733  | 140   | 5362  | 14         |
| 1418  | 6825  | 1814  | 10056 | 15         |
| 1430  | 4200  | 744   | 6374  | 16         |
| 1430  | 3500  | 116   | 5046  | 15         |

|      |      |      |      |    |
|------|------|------|------|----|
| 1358 | 2450 | 233  | 4041 | 15 |
| 1370 | 3500 | 58   | 4928 | 15 |
| 1430 | 3150 | 186  | 4766 | 15 |
| 1430 | 3967 | 372  | 5768 | 16 |
| 1251 | 2800 | 116  | 4167 | 14 |
| 1430 | 2800 | 93   | 4323 | 15 |
| 1430 | 4550 | 372  | 6352 | 15 |
| 1608 | 3150 | 302  | 5061 | 15 |
| 1430 | 3325 | 419  | 5173 | 14 |
| 1727 | 3150 | 1535 | 6412 | 14 |
| 1430 | 2800 | 256  | 4485 | 16 |
| 1370 | 2800 | 93   | 4263 | 14 |
| 1370 | 4550 | 47   | 5966 | 15 |
| 1489 | 3325 | 279  | 5093 | 14 |
| 1370 | 3150 | 372  | 4892 | 15 |
| 1430 | 4200 | 47   | 5676 | 15 |
| 1430 | 4433 | 140  | 6002 | 15 |
| 1430 | 3733 | 372  | 5535 | 14 |
| 1370 | 2333 | 279  | 3982 | 16 |
| 1549 | 2800 | 186  | 4535 | 15 |
| 1549 | 2917 | 116  | 4582 | 15 |
| 1430 | 3850 | 279  | 5559 | 15 |
| 1310 | 3150 | 186  | 4646 | 15 |
| 1430 | 2917 | 70   | 4416 | 15 |
| 1430 | 2800 | 186  | 4416 | 14 |
| 1489 | 3500 | 47   | 5036 | 15 |
| 1489 | 4200 | 93   | 5782 | 14 |
| 1430 | 2800 | 186  | 4416 | 15 |
| 1430 | 3733 | 349  | 5512 | 15 |
| 1430 | 2800 | 209  | 4439 | 15 |
| 1489 | 0    | 558  | 2047 | 15 |
| 1430 | 3150 | 337  | 4917 | 15 |
| 1549 | 1400 | 512  | 3460 | 15 |
| 1430 | 2800 | 47   | 4276 | 14 |
| 1489 | 3267 | 70   | 4826 | 16 |
| 1430 | 3850 | 140  | 5419 | 15 |
| 1430 | 4375 | 372  | 6177 | 15 |
| 1430 | 4900 | 326  | 6655 | 15 |
| 1906 | 1575 | 628  | 4109 | 16 |
| 1430 | 3150 | 395  | 4975 | 14 |
| 1430 | 3150 | 47   | 4626 | 16 |
| 1430 | 2275 | 23   | 3728 | 15 |
| 1251 | 3150 | 47   | 4447 | 14 |
| 2025 | 3150 | 93   | 5268 | 15 |
| 1430 | 4667 | 209  | 6305 | 16 |
| 1251 | 2800 | 326  | 4376 | 14 |
| 1430 | 3675 | 23   | 5128 | 15 |
| 1251 | 3500 | 47   | 4797 | 14 |
| 1430 | 2800 | 977  | 5206 | 14 |
| 1370 | 4200 | 558  | 6128 | 16 |

|       |      |      |       |    |
|-------|------|------|-------|----|
| 1430  | 2800 | 140  | 4369  | 16 |
| 1310  | 2800 | 186  | 4296  | 15 |
| 1430  | 2800 | 140  | 4369  | 16 |
| 1430  | 4725 | 279  | 6434  | 15 |
| 1430  | 2625 | 116  | 4171  | 15 |
| 1430  | 2625 | 1000 | 5054  | 16 |
| 1430  | 2800 | 186  | 4416  | 15 |
| 1430  | 4317 | 140  | 5886  | 14 |
| 1430  | 3325 | 488  | 5243  | 15 |
| 1430  | 2800 | 140  | 4369  | 14 |
| 1430  | 4375 | 116  | 5921  | 15 |
| 1430  | 1925 | 186  | 3541  | 15 |
| 1430  | 2450 | 1209 | 5089  | 15 |
| 1430  | 3850 | 233  | 5512  | 16 |
| 953   | 2800 | 558  | 4311  | 15 |
| 1430  | 2975 | 279  | 4684  | 16 |
| 1430  | 1400 | 616  | 3446  | 15 |
| 1430  | 4550 | 163  | 6142  | 16 |
| 1430  | 1983 | 186  | 3599  | 16 |
| 1549  | 2800 | 47   | 4395  | 15 |
| 1430  | 3150 | 186  | 4766  | 14 |
| 59208 | 2975 | 163  | 62345 | 15 |
| 1430  | 4667 | 140  | 6236  | 16 |
| 1370  | 2800 | 47   | 4216  | 16 |
| 1430  | 4200 | 267  | 5897  | 15 |
| 1430  | 2333 | 372  | 4135  | 15 |
| 1430  | 2100 | 35   | 3564  | 16 |
| 1430  | 2800 | 302  | 4532  | 15 |
| 1251  | 2800 | 535  | 4586  | 14 |
| 1787  | 2800 | 186  | 4773  | 15 |
| 1430  | 3150 | 721  | 5300  | 15 |
| 1430  | 3150 | 209  | 4789  | 16 |
| 1430  | 2975 | 512  | 4916  | 15 |
| 1370  | 2800 | 93   | 4263  | 15 |
| 1430  | 2800 | 93   | 4323  | 14 |
| 1430  | 2450 | 163  | 4042  | 15 |
| 1251  | 3325 | 70   | 4646  | 14 |
| 1430  | 4550 | 302  | 6282  | 16 |
| 1430  | 2100 | 581  | 4111  | 14 |
| 1549  | 3325 | 256  | 5129  | 15 |
| 1430  | 4200 | 163  | 5792  | 15 |
| 1787  | 3500 | 0    | 5287  | 15 |
| 1906  | 2800 | 558  | 5264  | 16 |
| 1430  | 2800 | 140  | 4369  | 15 |
| 1430  | 3500 | 93   | 5023  | 15 |
| 1668  | 2450 | 419  | 4536  | 15 |
| 1430  | 2800 | 209  | 4439  | 15 |
| 1430  | 3850 | 605  | 5884  | 15 |
| 1430  | 2800 | 47   | 4276  | 14 |
| 1370  | 3500 | 93   | 4963  | 16 |

|      |      |      |      |    |
|------|------|------|------|----|
| 1430 | 2800 | 314  | 4543 | 14 |
| 1430 | 3150 | 47   | 4626 | 15 |
| 1430 | 2888 | 442  | 4759 | 14 |
| 1430 | 2450 | 977  | 4856 | 14 |
| 1549 | 2800 | 349  | 4697 | 15 |
| 1430 | 3150 | 93   | 4673 | 15 |
| 1370 | 1983 | 453  | 3807 | 14 |
| 1430 | 1633 | 198  | 3261 | 15 |
| 1430 | 3150 | 163  | 4742 | 16 |
| 1430 | 4200 | 140  | 5769 | 16 |
| 1489 | 2800 | 70   | 4359 | 15 |
| 1430 | 3150 | 0    | 4580 | 16 |
| 2502 | 3850 | 256  | 6607 | 16 |
| 1251 | 2800 | 93   | 4144 | 14 |
| 1430 | 3733 | 163  | 5326 | 14 |
| 2025 | 2800 | 419  | 5244 | 16 |
| 1430 | 2625 | 140  | 4194 | 14 |
| 1489 | 2975 | 70   | 4534 | 15 |
| 1430 | 3967 | 372  | 5768 | 15 |
| 1430 | 2800 | 233  | 4462 | 16 |
| 1430 | 2800 | 535  | 4764 | 14 |
| 619  | 2800 | 302  | 3722 | 14 |
| 1489 | 2800 | 93   | 4382 | 16 |
| 1430 | 2975 | 70   | 4474 | 14 |
| 1430 | 1867 | 233  | 3529 | 16 |
| 1430 | 2800 | 140  | 4369 | 15 |
| 1430 | 4667 | 140  | 6236 | 14 |
| 2621 | 1750 | 163  | 4534 | 14 |
| 953  | 4667 | 512  | 6131 | 16 |
| 1430 | 3150 | 1424 | 6004 | 15 |
| 1430 | 2975 | 163  | 4567 | 16 |
| 3097 | 6300 | 442  | 9839 | 16 |
| 1310 | 2450 | 1070 | 4830 | 15 |
| 1549 | 4200 | 186  | 5935 | 14 |
| 1310 | 3967 | 209  | 5486 | 15 |
| 2025 | 1750 | 0    | 3775 | 15 |
| 1430 | 2800 | 140  | 4369 | 14 |
| 2621 | 4200 | 0    | 6821 | 14 |
| 1072 | 4200 | 279  | 5551 | 15 |
| 1310 | 3150 | 744  | 5204 | 14 |
| 1430 | 3150 | 721  | 5300 | 15 |
| 1608 | 3500 | 651  | 5759 | 15 |
| 1430 | 3500 | 326  | 5255 | 16 |
| 1013 | 4667 | 140  | 5819 | 15 |
| 1430 | 2188 | 209  | 3826 | 16 |
| 953  | 4550 | 163  | 5666 | 16 |
| 1251 | 2800 | 140  | 4190 | 14 |
| 1430 | 3150 | 93   | 4673 | 15 |
| 834  | 4200 | 1302 | 6336 | 14 |
| 893  | 2975 | 535  | 4403 | 15 |

|      |      |      |      |    |
|------|------|------|------|----|
| 1310 | 2100 | 1058 | 4468 | 16 |
| 1430 | 2975 | 140  | 4544 | 16 |
| 953  | 4200 | 256  | 5409 | 16 |
| 1310 | 3150 | 419  | 4879 | 15 |
| 1430 | 3500 | 93   | 5023 | 15 |
| 1430 | 2450 | 93   | 3973 | 15 |
| 1310 | 4200 | 140  | 5650 | 15 |
| 1310 | 1633 | 395  | 3339 | 14 |
| 1132 | 2800 | 465  | 4397 | 14 |
| 1310 | 2800 | 326  | 4436 | 15 |
| 1310 | 3033 | 651  | 4995 | 15 |
| 953  | 4375 | 1046 | 6374 | 16 |
| 1906 | 4667 | 465  | 7038 | 15 |
| 953  | 2450 | 639  | 4042 | 16 |
| 1430 | 3150 | 186  | 4766 | 16 |
| 1251 | 3150 | 256  | 4657 | 14 |
| 1310 | 3150 | 419  | 4879 | 15 |
| 953  | 3150 | 791  | 4894 | 15 |
| 1430 | 4200 | 23   | 5653 | 15 |
| 1430 | 3325 | 70   | 4824 | 15 |
| 893  | 3325 | 349  | 4567 | 15 |
| 834  | 2800 | 47   | 3680 | 14 |
| 953  | 4200 | 302  | 5455 | 16 |
| 1430 | 3150 | 93   | 4673 | 15 |
| 1310 | 3150 | 488  | 4949 | 14 |
| 1072 | 4200 | 47   | 5319 | 16 |
| 1310 | 3150 | 372  | 4832 | 16 |
| 1251 | 2800 | 256  | 4307 | 14 |
| 1310 | 2800 | 535  | 4645 | 15 |
| 1430 | 4200 | 186  | 5816 | 15 |
| 1310 | 2800 | 2069 | 6180 | 15 |
| 1370 | 3617 | 47   | 5033 | 15 |
| 1310 | 4550 | 1488 | 7348 | 15 |
| 1251 | 3850 | 442  | 5543 | 14 |
| 953  | 2888 | 628  | 4468 | 14 |
| 953  | 2683 | 651  | 4287 | 16 |
| 1787 | 2975 | 349  | 5111 | 14 |
| 1370 | 2800 | 47   | 4216 | 15 |
| 1072 | 2800 | 465  | 4337 | 15 |
| 1251 | 1867 | 395  | 3513 | 14 |
| 1132 | 2888 | 233  | 4252 | 16 |
| 1549 | 2450 | 1093 | 5091 | 15 |
| 1310 | 4200 | 163  | 5673 | 15 |
| 1310 | 2800 | 47   | 4157 | 16 |
| 1310 | 2800 | 93   | 4203 | 16 |
| 1310 | 3500 | 186  | 4996 | 16 |
| 1310 | 2800 | 93   | 4203 | 14 |
| 1430 | 3850 | 953  | 6233 | 15 |
| 1310 | 1517 | 140  | 2967 | 15 |
| 1251 | 3150 | 256  | 4657 | 14 |

|      |      |      |      |    |
|------|------|------|------|----|
| 1370 | 3500 | 1139 | 6009 | 15 |
| 1310 | 3325 | 209  | 4845 | 15 |
| 1310 | 4200 | 326  | 5836 | 16 |
| 953  | 2800 | 465  | 4218 | 15 |
| 1310 | 2800 | 395  | 4506 | 15 |
| 953  | 2800 | 977  | 4730 | 16 |
| 834  | 4200 | 256  | 5290 | 14 |
| 1251 | 5600 | 326  | 7176 | 14 |
| 1430 | 2800 | 256  | 4485 | 15 |
| 1251 | 5600 | 488  | 7339 | 14 |
| 1370 | 5600 | 663  | 7633 | 14 |
| 1251 | 3150 | 639  | 5040 | 14 |
| 1251 | 3150 | 198  | 4598 | 14 |
| 1310 | 3500 | 93   | 4903 | 15 |
| 1251 | 3675 | 279  | 5205 | 14 |
| 1430 | 2800 | 186  | 4416 | 16 |
| 1370 | 3850 | 140  | 5359 | 15 |
| 1430 | 2800 | 186  | 4416 | 15 |
| 834  | 4433 | 140  | 5407 | 14 |
| 1430 | 3150 | 1232 | 5812 | 16 |
| 1430 | 2800 | 233  | 4462 | 15 |
| 1430 | 3033 | 233  | 4695 | 15 |
| 1489 | 3733 | 233  | 5455 | 16 |
| 1251 | 3325 | 279  | 4855 | 14 |
| 1191 | 2917 | 1023 | 5131 | 14 |
| 1310 | 2800 | 209  | 4320 | 14 |
| 1370 | 3150 | 233  | 4752 | 15 |
| 1310 | 1633 | 186  | 3130 | 15 |
| 1430 | 2800 | 93   | 4323 | 14 |
| 1025 | 4200 | 140  | 5364 | 14 |
| 1370 | 2800 | 233  | 4402 | 14 |
| 1310 | 2625 | 221  | 4156 | 14 |
| 1310 | 2800 | 312  | 4422 | 14 |
| 1072 | 4200 | 279  | 5551 | 14 |
| 1430 | 2800 | 302  | 4532 | 16 |
| 1310 | 4900 | 163  | 6373 | 15 |
| 1310 | 1050 | 512  | 2872 | 15 |
| 1310 | 2800 | 140  | 4250 | 16 |
| 1430 | 2800 | 209  | 4439 | 16 |
| 1489 | 2800 | 140  | 4429 | 15 |
| 1430 | 2625 | 163  | 4217 | 15 |
| 1430 | 2800 | 256  | 4485 | 15 |
| 1430 | 4083 | 349  | 5862 | 16 |
| 1310 | 2800 | 93   | 4203 | 16 |
| 1430 | 3267 | 186  | 4882 | 15 |
| 2144 | 4200 | 279  | 6623 | 14 |
| 1310 | 2567 | 744  | 4621 | 16 |
| 1430 | 2800 | 279  | 4509 | 15 |
| 953  | 3150 | 690  | 4793 | 14 |
| 1251 | 4433 | 372  | 6056 | 14 |

|      |      |     |      |    |
|------|------|-----|------|----|
| 1072 | 3325 | 419 | 4816 | 15 |
| 1310 | 2800 | 186 | 4296 | 14 |
| 1310 | 3150 | 233 | 4693 | 16 |
| 1489 | 3733 | 593 | 5815 | 15 |
| 1430 | 4200 | 233 | 5862 | 14 |
| 1430 | 4200 | 140 | 5769 | 15 |
| 2025 | 5133 | 256 | 7414 | 16 |
| 1430 | 3150 | 349 | 4928 | 15 |
| 2085 | 3850 | 93  | 6028 | 15 |
| 1727 | 1400 | 326 | 3453 | 15 |
| 1310 | 1633 | 709 | 3653 | 16 |
| 1251 | 2800 | 395 | 4446 | 14 |
| 1549 | 6300 | 140 | 7988 | 14 |
| 1430 | 2800 | 163 | 4392 | 15 |
| 1251 | 3850 | 419 | 5519 | 14 |
| 1430 | 2800 | 93  | 4323 | 16 |
| 1430 | 2800 | 256 | 4485 | 14 |
| 1430 | 1925 | 698 | 4052 | 16 |
| 1430 | 3150 | 977 | 5556 | 15 |
| 1430 | 2450 | 860 | 4740 | 14 |
| 1310 | 4200 | 372 | 5882 | 15 |
| 1430 | 3033 | 384 | 4847 | 15 |
| 1251 | 0    | 93  | 1344 | 14 |
| 1430 | 3500 | 93  | 5023 | 16 |
| 953  | 3325 | 465 | 4743 | 15 |
| 1251 | 2567 | 140 | 3957 | 14 |
| 2204 | 5250 | 302 | 7756 | 15 |
| 1430 | 2800 | 256 | 4485 | 14 |
| 1072 | 2188 | 360 | 3620 | 16 |
| 1489 | 3150 | 0   | 4639 | 15 |
| 1310 | 1633 | 93  | 3037 | 15 |
| 1430 | 2800 | 884 | 5113 | 16 |
| 1251 | 2800 | 93  | 4144 | 14 |
| 1430 | 3150 | 256 | 4835 | 14 |
| 1430 | 3150 | 628 | 5207 | 14 |
| 1549 | 2800 | 140 | 4488 | 16 |
| 1251 | 1517 | 256 | 3023 | 14 |
| 1430 | 3150 | 140 | 4719 | 15 |
| 1310 | 2975 | 244 | 4530 | 14 |
| 1072 | 2800 | 419 | 4291 | 15 |
| 1251 | 4433 | 279 | 5963 | 14 |
| 1310 | 2975 | 0   | 4285 | 15 |
| 1430 | 2450 | 140 | 4019 | 16 |
| 1430 | 2450 | 488 | 4368 | 15 |
| 1310 | 2567 | 186 | 4063 | 14 |
| 1727 | 5775 | 395 | 7898 | 14 |
| 1310 | 3967 | 233 | 5510 | 14 |
| 1310 | 2800 | 93  | 4203 | 16 |
| 1310 | 2800 | 47  | 4157 | 15 |
| 1310 | 2800 | 116 | 4227 | 14 |

|      |      |      |      |    |
|------|------|------|------|----|
| 834  | 3500 | 140  | 4473 | 14 |
| 1430 | 2800 | 1837 | 6066 | 15 |
| 1310 | 2538 | 186  | 4034 | 16 |
| 1310 | 3733 | 209  | 5253 | 16 |
| 1310 | 3150 | 419  | 4879 | 15 |
| 1310 | 1400 | 535  | 3245 | 14 |
| 1430 | 2800 | 1163 | 5392 | 14 |
| 1370 | 2800 | 326  | 4495 | 14 |
| 953  | 3150 | 372  | 4475 | 15 |
| 1310 | 3150 | 574  | 5034 | 14 |
| 1310 | 2800 | 372  | 4482 | 16 |
| 953  | 2800 | 395  | 4148 | 15 |
| 1310 | 2742 | 1046 | 5098 | 16 |
| 834  | 3150 | 744  | 4728 | 14 |
| 1310 | 2800 | 186  | 4296 | 15 |
| 1430 | 4667 | 279  | 6375 | 14 |
| 1310 | 2625 | 279  | 4214 | 15 |
| 1072 | 1050 | 93   | 2215 | 15 |
| 1310 | 1575 | 488  | 3374 | 15 |
| 953  | 2800 | 512  | 4265 | 15 |
| 1430 | 3150 | 500  | 5079 | 16 |
| 1608 | 3150 | 93   | 4851 | 14 |
| 953  | 2800 | 465  | 4218 | 16 |
| 1668 | 2800 | 70   | 4538 | 14 |
| 1013 | 2625 | 140  | 3777 | 14 |
| 1310 | 3150 | 163  | 4623 | 15 |
| 1787 | 5133 | 256  | 7176 | 16 |
| 1310 | 3675 | 140  | 5125 | 14 |
| 1310 | 2450 | 488  | 4249 | 16 |
| 953  | 3150 | 93   | 4196 | 16 |
| 1072 | 2800 | 93   | 3965 | 15 |
| 834  | 2333 | 465  | 3632 | 14 |
| 1430 | 2800 | 93   | 4323 | 16 |
| 1072 | 3150 | 233  | 4455 | 15 |
| 953  | 2800 | 93   | 3846 | 14 |
| 953  | 4667 | 93   | 5713 | 16 |
| 834  | 4200 | 186  | 5220 | 14 |
| 953  | 2800 | 47   | 3800 | 15 |
| 1191 | 2975 | 372  | 4538 | 15 |
| 1072 | 0    | 953  | 2025 | 15 |
| 1072 | 2800 | 93   | 3965 | 14 |
| 1251 | 4200 | 256  | 5707 | 14 |
| 1668 | 4317 | 70   | 6054 | 16 |
| 1310 | 3150 | 128  | 4588 | 14 |
| 1013 | 2800 | 140  | 3952 | 15 |
| 834  | 4200 | 0    | 5034 | 14 |
| 953  | 2800 | 47   | 3800 | 15 |
| 834  | 2450 | 47   | 3330 | 14 |
| 953  | 2975 | 0    | 3928 | 16 |
| 1072 | 2800 | 116  | 3988 | 14 |



|      |      |     |      |    |
|------|------|-----|------|----|
| 1251 | 4667 | 535 | 6452 | 14 |
| 1013 | 3150 | 884 | 5046 | 14 |
| 1370 | 3850 | 93  | 5313 | 16 |
| 1072 | 2800 | 535 | 4407 | 14 |
| 834  | 2975 | 116 | 3925 | 14 |
| 834  | 2625 | 535 | 3994 | 14 |
| 1072 | 2800 | 744 | 4616 | 15 |
| 1727 | 4200 | 721 | 6648 | 14 |
| 953  | 2917 | 279 | 4149 | 14 |
| 1132 | 3150 | 93  | 4375 | 15 |
| 834  | 4667 | 326 | 5826 | 14 |
| 834  | 2800 | 47  | 3680 | 14 |
| 1430 | 3150 | 116 | 4696 | 14 |
| 953  | 2975 | 605 | 4533 | 14 |
| 834  | 2683 | 977 | 4494 | 14 |
| 1310 | 2800 | 47  | 4157 | 15 |
| 834  | 4200 | 349 | 5383 | 14 |
| 1251 | 2450 | 233 | 3933 | 15 |
| 1072 | 3500 | 372 | 4944 | 15 |
| 1072 | 4375 | 395 | 5842 | 16 |
| 1072 | 2800 | 93  | 3965 | 15 |
| 1370 | 4725 | 256 | 6351 | 14 |
| 834  | 2975 | 70  | 3879 | 14 |
| 1370 | 2800 | 163 | 4333 | 14 |
| 1132 | 2800 | 93  | 4025 | 16 |
| 953  | 4725 | 209 | 5887 | 15 |
| 834  | 2800 | 791 | 4424 | 14 |
| 953  | 3150 | 605 | 4708 | 16 |
| 834  | 4200 | 140 | 5173 | 14 |
| 834  | 2800 | 70  | 3704 | 14 |
| 1072 | 2975 | 163 | 4210 | 14 |
| 834  | 4375 | 0   | 5209 | 14 |
| 834  | 2625 | 105 | 3564 | 14 |
| 834  | 2800 | 279 | 3913 | 14 |
| 834  | 4200 | 233 | 5266 | 14 |
| 834  | 4200 | 198 | 5232 | 14 |
| 834  | 3150 | 93  | 4077 | 14 |
| 834  | 3267 | 419 | 4519 | 14 |
| 1310 | 2800 | 116 | 4227 | 15 |
| 953  | 2800 | 47  | 3800 | 15 |
| 834  | 2800 | 47  | 3680 | 14 |
| 834  | 5775 | 70  | 6679 | 14 |
| 834  | 1050 | 651 | 2535 | 14 |
| 834  | 4375 | 279 | 5488 | 14 |
| 1013 | 2800 | 140 | 3952 | 16 |
| 834  | 3150 | 395 | 4379 | 14 |
| 834  | 2800 | 140 | 3773 | 14 |
| 834  | 3150 | 419 | 4402 | 14 |
| 953  | 2800 | 256 | 4009 | 15 |
| 1251 | 2975 | 302 | 4528 | 14 |

|      |      |      |      |    |
|------|------|------|------|----|
| 1013 | 2450 | 140  | 3602 | 15 |
| 834  | 2800 | 93   | 3727 | 14 |
| 953  | 4900 | 186  | 6039 | 15 |
| 1430 | 4200 | 233  | 5862 | 16 |
| 1072 | 3675 | 698  | 5445 | 16 |
| 834  | 4433 | 233  | 5500 | 14 |
| 834  | 4375 | 116  | 5325 | 14 |
| 1549 | 3150 | 721  | 5419 | 15 |
| 834  | 4667 | 419  | 5919 | 14 |
| 834  | 4433 | 47   | 5314 | 14 |
| 834  | 2625 | 47   | 3505 | 14 |
| 953  | 2800 | 47   | 3800 | 15 |
| 953  | 2975 | 186  | 4114 | 14 |
| 834  | 1925 | 128  | 2887 | 14 |
| 834  | 2100 | 1209 | 4143 | 14 |
| 834  | 1925 | 116  | 2875 | 14 |
| 953  | 2975 | 70   | 3998 | 16 |
| 834  | 3150 | 372  | 4356 | 14 |
| 1191 | 3850 | 326  | 5367 | 15 |
| 893  | 2800 | 465  | 4158 | 15 |
| 834  | 2800 | 140  | 3773 | 14 |
| 834  | 1925 | 1279 | 4038 | 14 |
| 834  | 3150 | 233  | 4216 | 14 |
| 1191 | 4200 | 279  | 5670 | 15 |
| 953  | 4900 | 233  | 6086 | 15 |
| 1072 | 2450 | 1349 | 4871 | 15 |
| 834  | 3325 | 1000 | 5159 | 14 |
| 953  | 4550 | 47   | 5550 | 15 |
| 834  | 2450 | 791  | 4074 | 14 |
| 1430 | 4200 | 1349 | 6978 | 15 |
| 834  | 2800 | 163  | 3797 | 14 |
| 1072 | 1925 | 163  | 3160 | 16 |
| 834  | 2450 | 372  | 3656 | 14 |
| 834  | 3150 | 163  | 4147 | 14 |
| 834  | 2450 | 442  | 3726 | 14 |
| 1370 | 2100 | 884  | 4353 | 15 |
| 953  | 3500 | 140  | 4593 | 14 |
| 834  | 3383 | 209  | 4426 | 14 |
| 1132 | 2450 | 512  | 4093 | 15 |
| 953  | 3150 | 93   | 4196 | 14 |
| 834  | 3150 | 512  | 4495 | 14 |
| 953  | 4200 | 93   | 5246 | 14 |
| 834  | 3150 | 233  | 4216 | 14 |
| 834  | 3675 | 581  | 5090 | 14 |
| 953  | 1925 | 302  | 3180 | 15 |
| 953  | 3150 | 419  | 4522 | 16 |
| 1072 | 5075 | 233  | 6380 | 15 |
| 834  | 2975 | 116  | 3925 | 14 |
| 834  | 3150 | 47   | 4030 | 14 |
| 834  | 2800 | 233  | 3866 | 14 |

|      |      |      |      |    |
|------|------|------|------|----|
| 834  | 2100 | 1023 | 3957 | 14 |
| 953  | 2975 | 535  | 4463 | 15 |
| 834  | 1750 | 791  | 3374 | 14 |
| 953  | 2975 | 47   | 3975 | 14 |
| 834  | 2800 | 186  | 3820 | 14 |
| 1906 | 2800 | 0    | 4706 | 15 |
| 834  | 4725 | 186  | 5745 | 14 |
| 834  | 2975 | 535  | 4344 | 14 |
| 1072 | 3150 | 349  | 4571 | 14 |
| 834  | 4900 | 47   | 5780 | 14 |
| 893  | 3150 | 279  | 4322 | 16 |
| 1370 | 3150 | 302  | 4822 | 15 |
| 834  | 3325 | 814  | 4973 | 14 |
| 834  | 5075 | 930  | 6839 | 14 |
| 834  | 2450 | 488  | 3772 | 14 |
| 1013 | 2450 | 651  | 4114 | 15 |
| 834  | 4200 | 209  | 5243 | 14 |
| 834  | 2100 | 767  | 3701 | 14 |
| 1906 | 3500 | 233  | 5639 | 14 |
| 834  | 3150 | 512  | 4495 | 14 |
| 834  | 2450 | 791  | 4074 | 14 |
| 834  | 2800 | 349  | 3983 | 14 |
| 834  | 3325 | 209  | 4368 | 14 |
| 893  | 3150 | 302  | 4346 | 15 |
| 834  | 2800 | 512  | 4145 | 14 |
| 1430 | 5075 | 721  | 7225 | 15 |
| 834  | 2333 | 302  | 3469 | 14 |
| 834  | 2625 | 1046 | 4505 | 14 |
| 1727 | 3500 | 0    | 5227 | 15 |
| 953  | 2450 | 395  | 3798 | 14 |
| 953  | 2188 | 430  | 3571 | 14 |
| 834  | 2800 | 186  | 3820 | 14 |
| 834  | 2100 | 1116 | 4050 | 14 |
| 834  | 3150 | 326  | 4309 | 14 |
| 834  | 3150 | 302  | 4286 | 14 |
| 834  | 2800 | 93   | 3727 | 14 |
| 834  | 3150 | 256  | 4240 | 14 |
| 834  | 2450 | 140  | 3423 | 14 |
| 834  | 3150 | 372  | 4356 | 14 |
| 834  | 3150 | 47   | 4030 | 14 |
| 834  | 2800 | 419  | 4052 | 14 |
| 834  | 3150 | 326  | 4309 | 14 |
| 834  | 2800 | 837  | 4471 | 14 |
| 953  | 2800 | 93   | 3846 | 15 |
| 834  | 2450 | 314  | 3598 | 14 |
| 834  | 2975 | 70   | 3879 | 14 |
| 834  | 2800 | 256  | 3890 | 14 |
| 834  | 1050 | 349  | 2233 | 14 |
| 834  | 2450 | 488  | 3772 | 14 |
| 1847 | 6825 | 349  | 9020 | 15 |

|      |      |      |      |    |
|------|------|------|------|----|
| 834  | 2188 | 302  | 3324 | 14 |
| 834  | 3150 | 791  | 4774 | 14 |
| 953  | 2450 | 93   | 3496 | 15 |
| 953  | 2100 | 140  | 3193 | 15 |
| 834  | 3150 | 791  | 4774 | 14 |
| 834  | 2800 | 186  | 3820 | 14 |
| 834  | 2800 | 233  | 3866 | 14 |
| 834  | 2100 | 1256 | 4189 | 14 |
| 834  | 2800 | 395  | 4029 | 14 |
| 834  | 4200 | 349  | 5383 | 14 |
| 834  | 2800 | 93   | 3727 | 14 |
| 834  | 1750 | 233  | 2816 | 14 |
| 1072 | 2800 | 209  | 4081 | 15 |
| 834  | 3150 | 721  | 4705 | 14 |
| 1072 | 2450 | 198  | 3720 | 15 |
| 834  | 4375 | 256  | 5465 | 14 |
| 834  | 2100 | 279  | 3213 | 14 |
| 834  | 2800 | 1163 | 4796 | 14 |
| 834  | 2100 | 628  | 3562 | 14 |
| 834  | 3150 | 140  | 4123 | 14 |
| 953  | 2100 | 256  | 3309 | 14 |
| 834  | 2100 | 837  | 3771 | 14 |
| 834  | 3500 | 233  | 4566 | 14 |
| 834  | 2450 | 488  | 3772 | 14 |
| 953  | 2450 | 953  | 4356 | 14 |
| 834  | 2188 | 465  | 3486 | 14 |
| 834  | 2800 | 47   | 3680 | 14 |
| 834  | 3150 | 93   | 4077 | 14 |
| 834  | 2800 | 93   | 3727 | 14 |
| 1549 | 3500 | 186  | 5235 | 14 |
| 1668 | 3150 | 209  | 5027 | 14 |
| 834  | 2100 | 651  | 3585 | 14 |
| 834  | 2450 | 605  | 3888 | 14 |
| 834  | 1050 | 465  | 2349 | 14 |
| 834  | 2100 | 721  | 3655 | 14 |
| 834  | 4200 | 791  | 5824 | 14 |
| 834  | 2100 | 535  | 3469 | 14 |
| 834  | 2800 | 93   | 3727 | 14 |
| 953  | 2100 | 186  | 3239 | 15 |
| 953  | 2100 | 186  | 3239 | 14 |
| 1191 | 4900 | 256  | 6347 | 14 |
| 834  | 2450 | 419  | 3702 | 14 |
| 953  | 1867 | 651  | 3471 | 16 |
| 834  | 4375 | 256  | 5465 | 14 |
| 1072 | 2450 | 349  | 3871 | 15 |
| 834  | 2275 | 395  | 3504 | 14 |
| 834  | 1400 | 1209 | 3443 | 14 |
| 834  | 2450 | 140  | 3423 | 14 |
| 834  | 2975 | 93   | 3902 | 14 |
| 893  | 3150 | 116  | 4160 | 16 |

|      |      |      |      |    |
|------|------|------|------|----|
| 834  | 2975 | 116  | 3925 | 14 |
| 834  | 2975 | 302  | 4111 | 14 |
| 834  | 2975 | 93   | 3902 | 14 |
| 834  | 3150 | 174  | 4158 | 14 |
| 834  | 4900 | 233  | 5966 | 14 |
| 834  | 3150 | 372  | 4356 | 14 |
| 834  | 3150 | 372  | 4356 | 14 |
| 834  | 2800 | 140  | 3773 | 14 |
| 834  | 2800 | 140  | 3773 | 14 |
| 834  | 3121 | 349  | 4303 | 14 |
| 1191 | 4463 | 116  | 5770 | 14 |
| 834  | 5600 | 233  | 6666 | 14 |
| 834  | 2800 | 186  | 3820 | 14 |
| 893  | 2800 | 977  | 4670 | 15 |
| 1191 | 3150 | 244  | 4585 | 14 |
| 834  | 2800 | 47   | 3680 | 14 |
| 1191 | 2975 | 674  | 4841 | 14 |
| 834  | 3150 | 372  | 4356 | 14 |
| 834  | 3150 | 372  | 4356 | 14 |
| 834  | 2100 | 1488 | 4422 | 14 |
| 834  | 2800 | 442  | 4076 | 14 |
| 834  | 3500 | 70   | 4404 | 14 |
| 834  | 2188 | 465  | 3486 | 14 |
| 834  | 2800 | 302  | 3936 | 14 |
| 834  | 3150 | 558  | 4542 | 14 |
| 834  | 2800 | 767  | 4401 | 14 |
| 834  | 2917 | 884  | 4634 | 14 |
| 834  | 2975 | 186  | 3995 | 14 |
| 953  | 2975 | 1070 | 4998 | 16 |
| 834  | 3150 | 930  | 4914 | 14 |
| 834  | 2800 | 279  | 3913 | 14 |
| 834  | 3150 | 186  | 4170 | 14 |
| 1191 | 0    | 1046 | 2238 | 14 |
| 834  | 2975 | 116  | 3925 | 14 |
| 834  | 7000 | 209  | 8043 | 14 |
| 1191 | 6300 | 329  | 7821 | 14 |
| 834  | 6300 | 465  | 7599 | 14 |
| 834  | 2800 | 47   | 3680 | 14 |
| 834  | 3792 | 2313 | 6939 | 14 |
| 1072 | 2800 | 256  | 4128 | 15 |
| 834  | 3150 | 814  | 4798 | 14 |
| 834  | 6242 | 186  | 7262 | 14 |
| 1013 | 2333 | 70   | 3416 | 15 |
| 834  | 2800 | 186  | 3820 | 14 |
| 834  | 3150 | 628  | 4612 | 14 |
| 834  | 2100 | 349  | 3283 | 14 |
| 834  | 2800 | 302  | 3936 | 14 |
| 834  | 4200 | 163  | 5197 | 14 |
| 1191 | 5950 | 105  | 7246 | 14 |
| 834  | 3150 | 349  | 4333 | 14 |

|      |      |      |      |    |
|------|------|------|------|----|
| 1727 | 4667 | 174  | 6568 | 16 |
| 1430 | 3238 | 1279 | 5946 | 15 |
| 1191 | 3150 | 558  | 4899 | 14 |
| 834  | 2100 | 314  | 3248 | 14 |
| 834  | 2100 | 523  | 3457 | 14 |
| 834  | 2800 | 302  | 3936 | 14 |
| 834  | 3150 | 140  | 4123 | 14 |
| 834  | 3150 | 47   | 4030 | 14 |
| 834  | 2975 | 209  | 4018 | 14 |
| 834  | 3500 | 209  | 4543 | 14 |
| 834  | 2800 | 442  | 4076 | 14 |
| 834  | 3150 | 279  | 4263 | 14 |
| 953  | 2800 | 140  | 3893 | 15 |
| 834  | 2800 | 233  | 3866 | 14 |
| 893  | 3267 | 419  | 4579 | 15 |
| 953  | 3267 | 721  | 4940 | 14 |
| 1072 | 2975 | 488  | 4535 | 15 |
| 834  | 4200 | 93   | 5127 | 14 |
| 834  | 1750 | 47   | 2630 | 14 |
| 1727 | 3500 | 47   | 5274 | 15 |
| 834  | 2800 | 326  | 3959 | 14 |
| 834  | 3150 | 512  | 4495 | 14 |
| 834  | 2800 | 233  | 3866 | 14 |
| 834  | 4200 | 372  | 5406 | 14 |
| 834  | 2450 | 372  | 3656 | 14 |
| 834  | 3325 | 442  | 4601 | 14 |
| 1847 | 3150 | 47   | 5043 | 16 |
| 834  | 3150 | 209  | 4193 | 14 |
| 834  | 1925 | 256  | 3015 | 14 |
| 834  | 2800 | 651  | 4285 | 14 |
| 834  | 2800 | 721  | 4355 | 14 |
| 834  | 4200 | 233  | 5266 | 14 |
| 834  | 1400 | 1604 | 3838 | 14 |
| 953  | 2800 | 535  | 4288 | 16 |
| 834  | 2800 | 744  | 4378 | 14 |
| 834  | 3150 | 349  | 4333 | 14 |
| 834  | 2800 | 140  | 3773 | 14 |
| 953  | 2450 | 372  | 3775 | 16 |
| 834  | 3150 | 0    | 3984 | 14 |
| 834  | 3150 | 70   | 4054 | 14 |
| 834  | 4725 | 140  | 5698 | 14 |
| 834  | 3150 | 326  | 4309 | 14 |
| 1191 | 2858 | 791  | 4840 | 14 |
| 834  | 3033 | 1116 | 4983 | 14 |
| 1310 | 1925 | 70   | 3305 | 16 |
| 1132 | 2917 | 372  | 4420 | 15 |
| 1191 | 2188 | 116  | 3495 | 16 |
| 1072 | 2450 | 628  | 4150 | 14 |
| 953  | 2800 | 349  | 4102 | 15 |
| 834  | 2800 | 256  | 3890 | 14 |

|      |      |      |      |    |
|------|------|------|------|----|
| 834  | 2800 | 1232 | 4866 | 14 |
| 834  | 2800 | 116  | 3750 | 14 |
| 834  | 2800 | 209  | 3843 | 14 |
| 834  | 2800 | 302  | 3936 | 14 |
| 834  | 2800 | 209  | 3843 | 14 |
| 834  | 2625 | 70   | 3529 | 14 |
| 834  | 2450 | 140  | 3423 | 14 |
| 834  | 2800 | 140  | 3773 | 14 |
| 834  | 2800 | 140  | 3773 | 14 |
| 834  | 2800 | 256  | 3890 | 14 |
| 834  | 2800 | 163  | 3797 | 14 |
| 1072 | 0    | 884  | 1956 | 14 |
| 1191 | 2917 | 558  | 4666 | 16 |
| 1072 | 2800 | 372  | 4244 | 15 |
| 834  | 2800 | 674  | 4308 | 14 |
| 1430 | 3267 | 419  | 5115 | 15 |
| 834  | 2975 | 302  | 4111 | 14 |
| 2502 | 3500 | 233  | 6234 | 14 |
| 834  | 3150 | 442  | 4426 | 14 |
| 1847 | 4200 | 0    | 6047 | 15 |
| 1370 | 2917 | 744  | 5031 | 16 |
| 834  | 2625 | 70   | 3529 | 14 |
| 834  | 2800 | 326  | 3959 | 14 |
| 834  | 2800 | 93   | 3727 | 14 |
| 834  | 3150 | 558  | 4542 | 14 |
| 834  | 2800 | 186  | 3820 | 14 |
| 834  | 2800 | 953  | 4587 | 14 |
| 834  | 2625 | 70   | 3529 | 14 |
| 834  | 3150 | 93   | 4077 | 14 |
| 834  | 3150 | 209  | 4193 | 14 |
| 834  | 2800 | 512  | 4145 | 14 |
| 834  | 2450 | 279  | 3563 | 14 |
| 834  | 3150 | 442  | 4426 | 14 |
| 834  | 3033 | 326  | 4193 | 14 |
| 834  | 0    | 1721 | 2554 | 14 |
| 953  | 2100 | 233  | 3286 | 16 |
| 834  | 2800 | 535  | 4169 | 14 |
| 834  | 3500 | 721  | 5055 | 14 |
| 1430 | 2800 | 512  | 4741 | 15 |
| 1430 | 2013 | 116  | 3558 | 14 |
| 1191 | 2917 | 605  | 4712 | 16 |
| 1251 | 2917 | 233  | 4400 | 15 |
| 834  | 2975 | 256  | 4065 | 14 |
| 834  | 2800 | 535  | 4169 | 14 |
| 953  | 2100 | 140  | 3193 | 15 |
| 1072 | 2100 | 558  | 3730 | 15 |
| 1251 | 2100 | 47   | 3397 | 16 |
| 834  | 3267 | 140  | 4240 | 14 |
| 834  | 2450 | 186  | 3470 | 14 |
| 834  | 3150 | 721  | 4705 | 14 |
